# Supplementary material
Source: MDPI journal article supplement (https://www.mdpi.com/1424-8247/16/4/542)
Supplement: s1 [file s1]

## **Discovery of small-molecule antagonists of orexin 1/2 receptors from traditional Chinese medicinal plants with a hypnotic effect**

Jia He <sup>a,b,1</sup>, Jing Fang <sup>a,b,1</sup>, Yuxin Wang <sup>c</sup>, Chengyu Ge <sup>a,b</sup>, Shao Liu <sup>a,b\*</sup>, Yueping Jiang <sup>a,b\*</sup>

<sup>a</sup> *Department of Pharmacy, Xiangya Hospital, Central South University, Changsha, 410008, China*

<sup>b</sup> *Institute for Rational and Safe Medication Practices, National Clinical Research Center for Geriatric Disorders, Xiangya Hospital, Central South University, Changsha, 410008, China*

<sup>c</sup> *College of Pharmacy, Dali University, Dali, 671000, China*

<sup>1</sup>These authors contributed equally to this work

Correspondence to:

Shao Liu, PhD. Department of pharmacy, Xiangya Hospital, Central South University. No. 87 Xiang Ya Road Changsha 410008, People's Republic of China. E-mail: liushao999@csu.edu.cn

Or Yueping Jiang, PhD. Department of pharmacy, Xiangya Hospital, Central South University. No. 87 Xiang Ya Road Changsha 410008, People's Republic of China. E-mail: jiangyueping@csu.edu.cn

### **Supporting Materials**



Table S1. Fifteen medicinal plants were screened for the treatment of insomnia by searching in Chinese Pharmacopoeia

| TCM Name                                 | Key small molecule types                                                                                                   | References |
|------------------------------------------|----------------------------------------------------------------------------------------------------------------------------|------------|
| <i>Lilium lancifolium</i> thumb          | Steroidal saponins, Phenolic acids, Phenylpropanoids, Alkaloids, Flavonoids                                                | 40-42      |
| <i>Panax ginseng</i> C.A mey             | Saponins, Phytosterols, Flavonoids, Polyacetylenes, Fatty acids, Coumarins, Polyphenols, Phenolic acids, Cyclic dipeptides | 43-44      |
| <i>Ziziphus jujuba</i> mill. Var         | Saponins, Alkaloids, Flavonoids                                                                                            | 45-47      |
| <i>Bambusa tuldoidea</i> munro           | Saponins, Lignans                                                                                                          | 48-49      |
| <i>Physoclaina infundibularis</i> kuang  | Alkaloids, Coumarins, Flavonoids, Phenolic acids                                                                           | 50-51      |
| <i>Albizia julibrissin</i> durazz bark   | Flavonoids, Triterpenoid saponins, Lignans, Phytosterols                                                                   | 52-53      |
| <i>Albizia julibrissin</i> durazz flower | Flavonoids, Triterpenoid saponins                                                                                          | 54         |
| <i>Polygala tenuifolia</i> willd         | Triterpenoid saponins, Xanthones                                                                                           | 55-57      |
| <i>Ganoderma lucidum</i>                 | Triterpenoid saponins, Alkaloids                                                                                           | 59-62      |
| <i>Acanthopanax senticosus</i> harms     | Flavonoids, Triterpenoid saponins, Lignans, Coumarins                                                                      | 63-64      |
| <i>Apocynum venetum</i>                  | Flavonoids, Organic acids, Phoroglucinols, Phytosterols, Other glycosides                                                  | 65-67      |



*Platyclusus orientalis* franco      Fatty acids, Triterpenoid saponins, Terpenes, 68-70  
Polyphenols, Flavonoids

*Polygonum multiflorum*      Anthraquinones, Flavonoids, Phytosterols, 71-73  
thumb      Stilbenes、Anthocyanins

*Nelumbo nucifera* gaertn      Alkaloids, Phenolic acids, Flavonoids      74-75  
seeds

*Plumula Nelumbinis*      Alkaloids, Flavonoids, Phytosterols      76-77

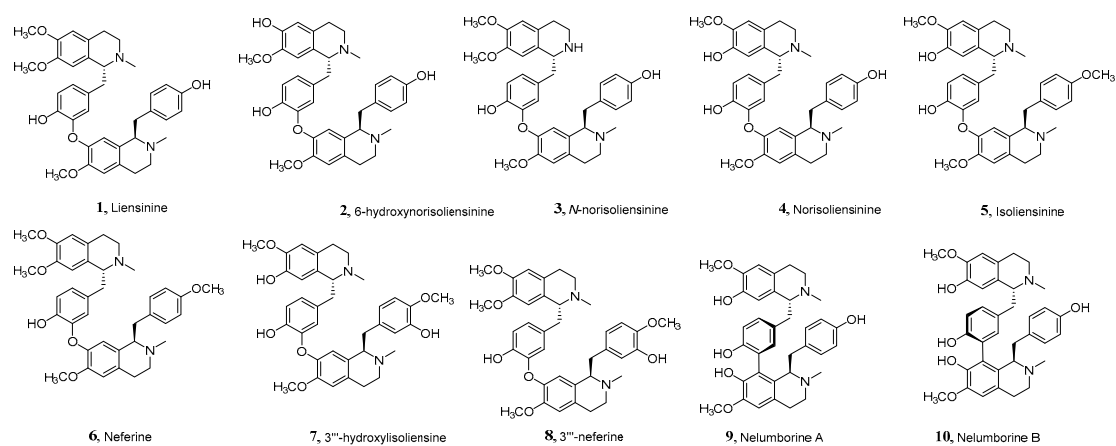

Figure S1. The structure of ten bisbenzylisoquinoline alkaloids

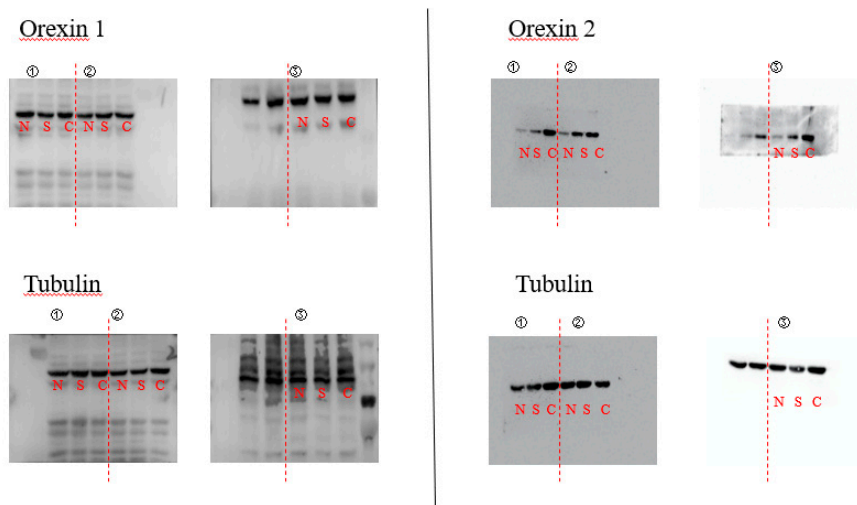

Figure S2. The original image of western bolts (C:Control; S:Suvorexant; N:Neferine)



Table S2 Chemical compositions in *Lilium lancifolium* Thumb

| No. | Compound                                                                                                                                                                                          | Type           | R                                                                                   |
|-----|---------------------------------------------------------------------------------------------------------------------------------------------------------------------------------------------------|----------------|-------------------------------------------------------------------------------------|
| 1   | (25S) -spirost-5-ene- $\beta$ 27-diol 3-O- $\beta$ -D-glucoside ( lilioglycoside B)                                                                                                               | S <sub>1</sub> | R <sub>1</sub> = G <sub>1</sub> , R <sub>2</sub> = R <sub>3</sub> = H               |
| 2   | (25S) -spirost-5-en- $\beta$ 27-diol 3-O-[ $\alpha$ -L-rha-(1 $\rightarrow$ 2) ]- $\beta$ -D-glucoside ( deacylbrownioside /lilioglycoside E)                                                     | S <sub>1</sub> | R <sub>1</sub> = G <sub>2</sub> , R <sub>2</sub> = R <sub>3</sub> = H               |
| 3   | 27-O-(3-hydroxy-3-methylglutaroyl) isonarthogenin 3-O- $\alpha$ -L-rha-(1 $\rightarrow$ 2)-O-[ $\beta$ -D-glu-(1 $\rightarrow$ 4) ]- $\beta$ -D-glucoside                                         | S <sub>1</sub> | R <sub>1</sub> = G <sub>3</sub> , R <sub>2</sub> = H , R <sub>3</sub> = HMG         |
| 4   | (25S) -27-hydroxyspirost-5-en- $\beta$ -yl 3-O- $\alpha$ -L-rha-(1 $\rightarrow$ 2)-O-[ $\beta$ -D-glu-(1 $\rightarrow$ 6) ]- $\beta$ -D-glucoside                                                | S <sub>1</sub> | R <sub>1</sub> = G <sub>4</sub> , R <sub>2</sub> = R <sub>3</sub> = H               |
| 5   | (25S) -spirost-5-ene- $\beta$ 27-diol 3-O- $\alpha$ -L-rha-(1 $\rightarrow$ 2)-O-[ $\alpha$ -L-ara-(1 $\rightarrow$ 3) ]- $\beta$ -D-glucoside                                                    | S <sub>1</sub> | R <sub>1</sub> = G <sub>5</sub> , R <sub>2</sub> = R <sub>3</sub> = H               |
| 6   | (25S) -spirost-5-ene- $\beta$ 27-diol 3-O- $\alpha$ -L-rha-(1 $\rightarrow$ 2)-O-[ $\beta$ -D-glu-(1 $\rightarrow$ 4) ]- $\beta$ -D-glucoside                                                     | S <sub>1</sub> | R <sub>1</sub> = G <sub>3</sub> , R <sub>2</sub> = R <sub>3</sub> = H               |
| 7   | (25S) -spirost-5-ene- $\beta$ 27-diol 3-O- $\alpha$ -L-rha-(1 $\rightarrow$ 2)-O-[ $\beta$ -D-glu-(1 $\rightarrow$ 3) ]- $\beta$ -D-glucoside ( lilioglycoside H)                                 | S <sub>1</sub> | R <sub>1</sub> = G <sub>6</sub> , R <sub>2</sub> = R <sub>3</sub> = H               |
| 8   | (25S) -spirost-5-ene- $\beta$ 27-diol 3-O- $\beta$ -D-glu-(1 $\rightarrow$ 3)-O- $\alpha$ -L-rha-(1 $\rightarrow$ 2)-O-[ $\beta$ -D-glu-(1 $\rightarrow$ 4) ]- $\beta$ -D-glucoside               | S <sub>1</sub> | R <sub>1</sub> = G <sub>7</sub> , R <sub>2</sub> = R <sub>3</sub> = H               |
| 9   | 27-O-[(3S) -3-O- $\beta$ -D-glu-3-methylglutaroyl] isonarthogenin 3-O-[ $\alpha$ -L-rha-(1 $\rightarrow$ 2) ]- $\beta$ -D-glucoside                                                               | S <sub>1</sub> | R <sub>1</sub> = G <sub>2</sub> , R <sub>2</sub> = H , R <sub>3</sub> = 3-O-glu-HMG |
| 10  | (25S) -spirost-5-ene- $\beta$ ,17 $\alpha$ 27-triol 3-O- $\beta$ -D-glu-(1 $\rightarrow$ 2)-O- $\beta$ -D-glu-(1 $\rightarrow$ 4)- $\beta$ -D-glucoside                                           | S <sub>1</sub> | R <sub>1</sub> = G <sub>8</sub> , R <sub>2</sub> = OH , R <sub>3</sub> = H          |
| 11  | (25S) -spirost-5-ene- $\beta$ ,17 $\alpha$ 27-triol 3-O- $\alpha$ -L-rha-(1 $\rightarrow$ 2)-O-[ $\beta$ -D-glu-(1 $\rightarrow$ 2)-O- $\beta$ -D-glu-(1 $\rightarrow$ 4) ]- $\beta$ -D-glucoside | S <sub>1</sub> | R <sub>1</sub> = G <sub>9</sub> , R <sub>2</sub> = OH , R <sub>3</sub> = H          |
| 12  | (25S) -5 $\alpha$ -spirostane- $\beta$ ,17 $\alpha$ 27-triol 3-O- $\beta$ -D-glu-(1 $\rightarrow$ 2)-O- $\beta$ -D-glu-(1 $\rightarrow$ 4)- $\beta$ -D-glucoside                                  | S <sub>2</sub> | R = G <sub>8</sub>                                                                  |
| 13  | (24S ,25S) - $\beta$ ,17 $\alpha$ ,24-trihydroxy-5 $\alpha$ -spirostan-6-one 3-O- $\alpha$ -L-rha-(1 $\rightarrow$ 2)- $\beta$ -D-glucoside                                                       | S <sub>3</sub> | R = G <sub>2</sub>                                                                  |
| 14  | (25R) -spirost-5-en- $\beta$ -ol 3-O- $\beta$ -D-glucoside ( lilioglycoside A/trillin)                                                                                                            | S <sub>4</sub> | R = G <sub>1</sub>                                                                  |



Table S2(continued)

| No. | Compound                                                                                                                                                                                               | Type           | R                                                                                               |
|-----|--------------------------------------------------------------------------------------------------------------------------------------------------------------------------------------------------------|----------------|-------------------------------------------------------------------------------------------------|
| 14  | (25R)-spirost-5-en-3 $\beta$ -ol 3-O- $\beta$ -D-glucoside ( lilioglycoside A/trillin)                                                                                                                 | S <sub>4</sub> | R = G <sub>1</sub>                                                                              |
| 15  | (25R)-spirost-5-en-3 $\beta$ -ol 3-O-L-rha-(1 $\rightarrow$ 2)-D-glucoside ( lilioglycoside D/prosapogenin A of dioscin)                                                                               | S <sub>4</sub> | R = G <sub>2</sub>                                                                              |
| 16  | (25R)-spirost-5-en-3 $\beta$ -ol 3-O- $\alpha$ -L-rha-(1 $\rightarrow$ 2)-O-[ $\beta$ -D-glu-(1 $\rightarrow$ 3)]- $\beta$ -D-glucoside ( lilioglycoside G/gracillin)                                  | S <sub>4</sub> | R = G <sub>6</sub>                                                                              |
| 17  | (25R)-spirost-5-en-3 $\beta$ -ol 3-O- $\alpha$ -L-rha-(1 $\rightarrow$ 2)-O-[ $\beta$ -D-glu-(1 $\rightarrow$ 6)]- $\beta$ -D-glucoside                                                                | S <sub>4</sub> | R = G <sub>4</sub>                                                                              |
| 18  | (25R)-spirost-5-en-3 $\beta$ -ol 3-O- $\alpha$ -L-rha-(1 $\rightarrow$ 2)-O-[ $\alpha$ -L-ara-(1 $\rightarrow$ 3)]- $\beta$ -D-glucoside ( lililancifolside A)                                         | S <sub>4</sub> | R = G <sub>5</sub>                                                                              |
| 19  | dioscin                                                                                                                                                                                                | S <sub>4</sub> | R = G <sub>10</sub>                                                                             |
| 20  | (25R)-spirost-5-ene-3 $\beta$ -ol 3-O- $\alpha$ -L-rha-(1 $\rightarrow$ 2)-O-[ $\beta$ -D-xyl-(1 $\rightarrow$ 3)]- $\beta$ -D-glucoside ( ophiopogonin D')                                            | S <sub>4</sub> | R = G <sub>11</sub>                                                                             |
| 21  | diosgenin 3-O- $\beta$ -D-glu-(1 $\rightarrow$ 2)- $\beta$ -D-glu-(1 $\rightarrow$ 4)- $\beta$ -D-galactoside ( fukioside D)                                                                           | S <sub>4</sub> | R = G <sub>12</sub>                                                                             |
| 22  | diosgenin 3-O-[ $\beta$ -D-glu-(1 $\rightarrow$ 2)]-[ $\beta$ -D-xyl-(1 $\rightarrow$ 3)]- $\beta$ -D-glu-(1 $\rightarrow$ 4)- $\beta$ -D-galactoside ( aspidistrin)                                   | S <sub>4</sub> | R = G <sub>13</sub>                                                                             |
| 23  | (25R)-2 $\alpha$ ,3 $\beta$ -dihydroxy-spirost-5-en-4 $\beta$ -O- $\alpha$ -L-rha-(1 $\rightarrow$ 2)- $\beta$ -D-xyloside ( atropuroside A)                                                           | S <sub>5</sub> | R = G <sub>14</sub>                                                                             |
| 24  | (25R)-2 $\alpha$ ,3 $\beta$ ,17 $\alpha$ -trihydroxy-spirost-5-en-4 $\beta$ -O- $\beta$ -D-xyloside ( atropuroside C)                                                                                  | S <sub>5</sub> | R = G <sub>15</sub>                                                                             |
| 25  | (25R)-spirost-5-en-3 $\beta$ ,27-diol 3-O- $\alpha$ -L-rha-(1 $\rightarrow$ 2)- $\beta$ -D-glucoside                                                                                                   | S <sub>6</sub> | R <sub>1</sub> = G <sub>2</sub> , R <sub>2</sub> = H                                            |
| 26  | (25R)-27-(3-hydroxy-3-methylglutarate)-spirost-5-ene-3 $\beta$ ,27-diol 3-O- $\beta$ -D-glucoside ( lilioglycoside C)                                                                                  | S <sub>6</sub> | R <sub>1</sub> = G <sub>1</sub> , R <sub>2</sub> = HMG                                          |
| 27  | (25R)-27-O-(3-hydroxy-3-methylglutaryl)-spirost-5-en-3 $\beta$ ,27-diol 3-O- $\alpha$ -L-rha-(1 $\rightarrow$ 2)- $\beta$ -D-glucoside ( brownioside/lilioglycoside F)                                 | S <sub>6</sub> | R <sub>1</sub> = G <sub>2</sub> , R <sub>2</sub> = HMG                                          |
| 28  | (25R)-27-[[S]-3-hydroxy-3-methylglutarate]-spirost-5-ene-3 $\beta$ ,27-diol 3-O- $\alpha$ -L-rha-(1 $\rightarrow$ 2)-O-[ $\beta$ -D-glu-(1 $\rightarrow$ 3)]- $\beta$ -D-glucoside ( lilioglycoside I) | S <sub>6</sub> | R <sub>1</sub> = G <sub>6</sub> , R <sub>2</sub> = HMG                                          |
| 29  | (25R)-27-O-[[S]-3-hydroxy-3-methylglutaryl]-spirost-5-ene-3 $\beta$ ,27-diol 3-O- $\alpha$ -L-rha-(1 $\rightarrow$ 2)-O-[ $\beta$ -D-glu-(1 $\rightarrow$ 4)]- $\beta$ -D-glucoside                    | S <sub>6</sub> | R <sub>1</sub> = G <sub>3</sub> , R <sub>2</sub> = HMG                                          |
| 30  | (25R)-27-O-[[S]-3-hydroxy-3-methylglutaryl]-spirost-5-ene-3 $\beta$ ,27-diol 3-O- $\alpha$ -L-rha-(1 $\rightarrow$ 2)-O-[ $\alpha$ -L-ara-(1 $\rightarrow$ 3)]- $\beta$ -D-glucoside                   | S <sub>6</sub> | R <sub>1</sub> = G <sub>5</sub> , R <sub>2</sub> = HMG                                          |
| 31  | (25R)-27-O-[[S]-3-hydroxy-3-methylglutaryl]-spirost-5 $\alpha$ -3 $\beta$ ,27-diol 3-O- $\alpha$ -L-rha-(1 $\rightarrow$ 2)- $\beta$ -D-glucoside                                                      | S <sub>7</sub> | R <sub>1</sub> = G <sub>2</sub> , R <sub>2</sub> = HMG                                          |
| 32  | (23S,25R)-23-hydroxyspirost-5-en-3 $\beta$ -O- $\alpha$ -L-rha-(1 $\rightarrow$ 2)-O-[ $\beta$ -D-glu-(1 $\rightarrow$ 6)]- $\beta$ -D-glucoside                                                       | S <sub>8</sub> | R <sub>1</sub> = G <sub>4</sub> , R <sub>2</sub> = R <sub>4</sub> = H, R <sub>3</sub> = OH      |
| 33  | (25R,26R)-17 $\alpha$ -hydroxy-26-methoxyspirost-5-en-3 $\beta$ -O- $\alpha$ -L-rha-(1 $\rightarrow$ 2)-O-[ $\beta$ -D-glu-(1 $\rightarrow$ 6)]- $\beta$ -D-glucoside                                  | S <sub>8</sub> | R <sub>1</sub> = G <sub>4</sub> , R <sub>2</sub> = OH, R <sub>3</sub> = H, R <sub>4</sub> = OMe |
| 34  | (25R,26R)-26-methoxyspirost-5-en-3 $\beta$ -O- $\alpha$ -L-rha-(1 $\rightarrow$ 2)-O-[ $\beta$ -D-glu-(1 $\rightarrow$ 6)]- $\beta$ -D-glucoside                                                       | S <sub>8</sub> | R <sub>1</sub> = G <sub>4</sub> , R <sub>2</sub> = R <sub>3</sub> = H, R <sub>4</sub> = OMe     |
| 35  | (25R,26R)-26-methoxyspirost-5-en-3 $\beta$ -ol 3-O- $\alpha$ -L-rha-(1 $\rightarrow$ 2)-O-[ $\alpha$ -L-ara-(1 $\rightarrow$ 3)]- $\beta$ -D-glucoside                                                 | S <sub>8</sub> | R <sub>1</sub> = G <sub>5</sub> , R <sub>2</sub> = R <sub>3</sub> = H, R <sub>4</sub> = OMe     |
| 36  | (25R,26R)-26-methoxyspirost-5-en-3 $\beta$ -ol 3-O- $\alpha$ -L-rha-(1 $\rightarrow$ 2)-O-[ $\beta$ -D-glu-(1 $\rightarrow$ 4)]- $\beta$ -D-glucoside                                                  | S <sub>8</sub> | R <sub>1</sub> = G <sub>3</sub> , R <sub>2</sub> = R <sub>3</sub> = H, R <sub>4</sub> = OMe     |
| 37  | (25R,26R)-26-methoxyspirost-5-en-3 $\beta$ -ol 3-O- $\alpha$ -L-rha-(1 $\rightarrow$ 2)- $\beta$ -D-glucoside                                                                                          | S <sub>8</sub> | R <sub>1</sub> = G <sub>2</sub> , R <sub>2</sub> = R <sub>3</sub> = H, R <sub>4</sub> = OMe     |
| 38  | (25R,26R)-26-methoxyspirost-5-ene-3 $\beta$ ,17 $\alpha$ -diol 3-O- $\alpha$ -L-rha-(1 $\rightarrow$ 2)- $\beta$ -D-glucoside                                                                          | S <sub>8</sub> | R <sub>1</sub> = G <sub>2</sub> , R <sub>2</sub> = OH, R <sub>3</sub> = H, R <sub>4</sub> = OMe |
| 39  | (25R,26R)-26-methoxyspirost-5-ene-3 $\beta$ ,17 $\alpha$ -diol 3-O- $\alpha$ -L-rha-(1 $\rightarrow$ 2)-O-[ $\beta$ -D-glu-(1 $\rightarrow$ 4)]- $\beta$ -D-glucoside                                  | S <sub>8</sub> | R <sub>1</sub> = G <sub>3</sub> , R <sub>2</sub> = OH, R <sub>3</sub> = H, R <sub>4</sub> = OMe |



Table S2(continued)

| No. | Compound                                                                                                                                                                                                                                                   | Type            | R                                                                                                |
|-----|------------------------------------------------------------------------------------------------------------------------------------------------------------------------------------------------------------------------------------------------------------|-----------------|--------------------------------------------------------------------------------------------------|
| 40  | (25 <i>R</i> , 26 <i>R</i> )-26-methoxyspirost-5-ene-3 $\beta$ , 17 $\alpha$ -diol 3- <i>O</i> - $\alpha$ -L-rha-(1 $\rightarrow$ 2)- <i>O</i> -[6- <i>O</i> -acetyl- $\beta$ -D-glu-(1 $\rightarrow$ 4)]- $\beta$ -D-glucoside                            | S <sub>8</sub>  | R <sub>1</sub> = G <sub>16</sub> , R <sub>2</sub> = OH, R <sub>3</sub> = H, R <sub>4</sub> = OMe |
| 41  | (25 <i>R</i> , 26 <i>R</i> )-26-ethoxyspirost-5-ene-3 $\beta$ -ol 3- <i>O</i> - $\alpha$ -L-rha-(1 $\rightarrow$ 2)-[ $\beta$ -D-glu-(1 $\rightarrow$ 4)]- $\beta$ -D-glucoside                                                                            | S <sub>8</sub>  | R <sub>1</sub> = G <sub>3</sub> , R <sub>2</sub> = R <sub>3</sub> = H, R <sub>4</sub> = OEt      |
| 42  | (25 <i>R</i> , 26 <i>R</i> )-26-methoxyspirost-5-ene-3 $\beta$ -ol 3- <i>O</i> - $\alpha$ -L-rha-(1 $\rightarrow$ 2)- <i>O</i> -[6- <i>O</i> -acetyl- $\beta$ -D-glu-(1 $\rightarrow$ 4)]- $\beta$ -D-glucoside                                            | S <sub>8</sub>  | R <sub>1</sub> = G <sub>16</sub> , R <sub>2</sub> = R <sub>3</sub> = H, R <sub>4</sub> = OMe     |
| 43  | (25 <i>R</i> )-spirost-5-en-3 $\beta$ , 12 $\alpha$ -diol 3- <i>O</i> - $\alpha$ -L-rha-(1 $\rightarrow$ 2)- <i>O</i> -[ $\beta$ -D-glu-(1 $\rightarrow$ 4)]- $\beta$ -D-glucoside                                                                         | S <sub>9</sub>  | R = G <sub>3</sub>                                                                               |
| 44  | (25 <i>R</i> )-3 $\beta$ , 17 $\alpha$ -diol-5 $\alpha$ -spirostan 3- <i>O</i> - $\alpha$ -L-rha-(1 $\rightarrow$ 2)- <i>O</i> -[ $\beta$ -D-glu-(1 $\rightarrow$ 4)]- $\beta$ -D-glucoside                                                                | S <sub>10</sub> | R <sub>1</sub> = G <sub>3</sub> , R <sub>2</sub> = H                                             |
| 45  | (25 <i>R</i> )-5 $\alpha$ -spirostan-3 $\beta$ , 17 $\alpha$ -diol 3- <i>O</i> - $\beta$ -D-xy-(1 $\rightarrow$ 4)-[ $\alpha$ -L-ara-(1 $\rightarrow$ 6)]- $\beta$ -D-glucoside                                                                            | S <sub>10</sub> | R <sub>1</sub> = G <sub>17</sub> , R <sub>2</sub> = H                                            |
| 46  | (25 <i>R</i> )-spirost-3 $\beta$ , 17 $\alpha$ , 21-triol 3- <i>O</i> - $\alpha$ -L-rha-(1 $\rightarrow$ 2)-[ $\alpha$ -L-ara-(1 $\rightarrow$ 3)]- $\beta$ -D-glucoside (pardarioside E)                                                                  | S <sub>10</sub> | R <sub>1</sub> = G <sub>5</sub> , R <sub>2</sub> = OH                                            |
| 47  | (25 <i>R</i> )-3 $\beta$ , 17 $\alpha$ -dihydroxy-5 $\alpha$ -spirostan-6-one 3- <i>O</i> - $\alpha$ -L-rha-(1 $\rightarrow$ 2)- $\beta$ -D-glucoside                                                                                                      | S <sub>11</sub> | R <sub>1</sub> = G <sub>2</sub> , R <sub>2</sub> = OH, R <sub>3</sub> = H                        |
| 48  | (25 <i>R</i> )-3 $\beta$ , 17 $\alpha$ -dihydroxy-5 $\alpha$ -spirostan-6-one 3- <i>O</i> - $\alpha$ -L-rha-(1 $\rightarrow$ 2)- <i>O</i> -[ $\alpha$ -L-ara-(1 $\rightarrow$ 3)]- $\beta$ -D-glucoside                                                    | S <sub>11</sub> | R <sub>1</sub> = G <sub>5</sub> , R <sub>2</sub> = OH, R <sub>3</sub> = H                        |
| 49  | (25 <i>R</i> )-3 $\beta$ -hydroxy-5 $\alpha$ -spirost-6-one 3- <i>O</i> - $\alpha$ -L-rha-(1 $\rightarrow$ 2)- $\beta$ -D-glucoside                                                                                                                        | S <sub>11</sub> | R <sub>1</sub> = G <sub>2</sub> , R <sub>2</sub> = R <sub>3</sub> = H                            |
| 50  | (25 <i>R</i> )-3 $\beta$ -hydroxy-5 $\alpha$ -spirostan-6-one 3- <i>O</i> - $\alpha$ -L-ara-(1 $\rightarrow$ 6)- $\beta$ -D-glucoside                                                                                                                      | S <sub>11</sub> | R <sub>1</sub> = G <sub>18</sub> , R <sub>2</sub> = R <sub>3</sub> = H                           |
| 51  | (25 <i>R</i> )-3 $\beta$ , 17 $\alpha$ , 27-triol-spirostan-6-one 3- <i>O</i> - $\alpha$ -L-rha-(1 $\rightarrow$ 2)- $\beta$ -D-glucoside (pumilum A)                                                                                                      | S <sub>11</sub> | R <sub>1</sub> = G <sub>2</sub> , R <sub>2</sub> = R <sub>3</sub> = OH                           |
| 52  | (25 <i>R</i> )-3 $\beta$ , 17 $\alpha$ , 27-triol-spirostan-6-one 3- <i>O</i> - $\alpha$ -L-rha-(1 $\rightarrow$ 2)-[ $\beta$ -D-glu-(1 $\rightarrow$ 6)]- $\beta$ -D-glucoside (callosum A)                                                               | S <sub>11</sub> | R <sub>1</sub> = G <sub>4</sub> , R <sub>2</sub> = R <sub>3</sub> = OH                           |
| 53  | 26- <i>O</i> - $\beta$ -D-glu-nuatigenin 3- <i>O</i> - $\alpha$ -L-rha-(1 $\rightarrow$ 2)- $\beta$ -D-glucoside                                                                                                                                           | S <sub>12</sub> | R <sub>1</sub> = G <sub>2</sub> , R <sub>2</sub> = G <sub>1</sub>                                |
| 54  | 26- <i>O</i> - $\beta$ -D-glu-nuatigenin 3- <i>O</i> - $\alpha$ -L-rha-(1 $\rightarrow$ 2)- <i>O</i> -[ $\beta$ -D-glu-(1 $\rightarrow$ 4)]- $\beta$ -D-glucoside                                                                                          | S <sub>12</sub> | R <sub>1</sub> = G <sub>3</sub> , R <sub>2</sub> = G <sub>1</sub>                                |
| 55  | 26- <i>O</i> - $\beta$ -D-glu-nuatigenin                                                                                                                                                                                                                   | S <sub>12</sub> | R <sub>1</sub> = H, R <sub>2</sub> = G <sub>1</sub>                                              |
| 56  | 26- <i>O</i> - $\beta$ -D-glu-nuatigenin 3- <i>O</i> - $\beta$ -D-glucoside                                                                                                                                                                                | S <sub>12</sub> | R <sub>1</sub> = R <sub>2</sub> = G <sub>1</sub>                                                 |
| 57  | 26- <i>O</i> - $\beta$ -D-glu-nuatigenin 3- <i>O</i> - $\alpha$ -L-rha-(1 $\rightarrow$ 2)-[ $\beta$ -D-glu-(1 $\rightarrow$ 6)]- $\beta$ -D-glucoside                                                                                                     | S <sub>12</sub> | R <sub>1</sub> = G <sub>4</sub> , R <sub>2</sub> = G <sub>1</sub>                                |
| 58  | 26- <i>O</i> -[ $\beta$ -D-glu-(1 $\rightarrow$ 2)]- $\beta$ -D-glu-nuatigenin 3- <i>O</i> - $\alpha$ -L-rha-(1 $\rightarrow$ 2)- $\beta$ -D-glucoside                                                                                                     | S <sub>12</sub> | R <sub>1</sub> = G <sub>2</sub> , R <sub>2</sub> = G <sub>19</sub>                               |
| 59  | (25 <i>S</i> )-26- <i>O</i> - $\beta$ -D-glu-22, 25-epoxyfurost-5 $\alpha$ -3 $\beta$ , 26-diol 3- <i>O</i> -[ $\alpha$ -L-rha-(1 $\rightarrow$ 2)]- $\beta$ -D-glucoside                                                                                  | S <sub>13</sub> | R <sub>1</sub> = G <sub>2</sub> , R <sub>2</sub> = G <sub>1</sub>                                |
| 60  | (25 <i>R</i> )-furost-5-en-3 $\beta$ , 22 $\alpha$ , 26-triol 3, 26-di- <i>O</i> - $\beta$ -D-glucoside (lilioglycoside K)                                                                                                                                 | S <sub>14</sub> | R <sub>1</sub> = R <sub>3</sub> = G <sub>1</sub> , R <sub>2</sub> = H                            |
| 61  | (25 <i>R</i> )-26- <i>O</i> - $\beta$ -D-glu-furost-5-en-3 $\beta$ , 22 $\alpha$ , 26-triol 3- <i>O</i> -L-rha-(1 $\rightarrow$ 2)-D-glucoside (lilioglycoside N)                                                                                          | S <sub>14</sub> | R <sub>1</sub> = G <sub>2</sub> , R <sub>2</sub> = H, R <sub>3</sub> = G <sub>1</sub>            |
| 62  | (25 <i>R</i> )-26- <i>O</i> - $\beta$ -D-glu-furost-5-en-3 $\beta$ , 22 $\alpha$ , 26-triol 3- <i>O</i> -[ <i>O</i> -L-rha-(1 $\rightarrow$ 2)]-[ <i>O</i> -D-glu-(1 $\rightarrow$ 3)]- $\beta$ -D-glucoside (lilioglycoside R)                            | S <sub>14</sub> | R <sub>1</sub> = G <sub>6</sub> , R <sub>2</sub> = H, R <sub>3</sub> = G <sub>1</sub>            |
| 63  | (25 <i>R</i> )-22- <i>O</i> -methyl-26- <i>O</i> - $\beta$ -D-glu-furost-5-ene-3 $\beta$ , 22 $\xi$ , 26-triol 3- <i>O</i> - $\alpha$ -L-rha-(1 $\rightarrow$ 2)- $\beta$ -D-glucoside                                                                     | S <sub>14</sub> | R <sub>1</sub> = G <sub>2</sub> , R <sub>2</sub> = H, R <sub>3</sub> = G <sub>1</sub>            |
| 64  | (25 <i>R</i> )-22- <i>O</i> -methyl-26- <i>O</i> - $\beta$ -D-glu-furost-5-ene-3 $\beta$ , 22 $\xi$ , 26-triol 3- <i>O</i> - $\alpha$ -L-rha-(1 $\rightarrow$ 2)- <i>O</i> -[ $\beta$ -D-glu-(1 $\rightarrow$ 3)]- $\beta$ -D-glucoside (trigofoenoside D) | S <sub>14</sub> | R <sub>1</sub> = G <sub>6</sub> , R <sub>2</sub> = Me, R <sub>3</sub> = G <sub>1</sub>           |
| 65  | (25 <i>R</i> )-22- <i>O</i> -methyl-26- <i>O</i> - $\beta$ -D-glu-furost-5-ene-3 $\beta$ , 22 $\xi$ , 26-triol 3- <i>O</i> - $\alpha$ -L-rha-(1 $\rightarrow$ 2)- <i>O</i> -[ $\beta$ -D-glu-(1 $\rightarrow$ 4)]- $\beta$ -D-glucoside                    | S <sub>14</sub> | R <sub>1</sub> = G <sub>3</sub> , R <sub>2</sub> = Me, R <sub>3</sub> = G <sub>1</sub>           |
| 66  | (25 <i>R</i> )-22- <i>O</i> -methyl-26- <i>O</i> - $\beta$ -D-glu-furost-5-ene-3 $\beta$ , 22 $\xi$ , 26-triol 3- <i>O</i> - $\alpha$ -L-rha-(1 $\rightarrow$ 2)- <i>O</i> -[ $\alpha$ -L-ara-(1 $\rightarrow$ 3)]- $\beta$ -D-glucoside                   | S <sub>14</sub> | R <sub>1</sub> = G <sub>5</sub> , R <sub>2</sub> = Me, R <sub>3</sub> = G <sub>1</sub>           |



Table S2(continued)

| No. | Compound                                                                                                                                                                                                                              | Type            | R                                                                                               |
|-----|---------------------------------------------------------------------------------------------------------------------------------------------------------------------------------------------------------------------------------------|-----------------|-------------------------------------------------------------------------------------------------|
| 67  | (25R)-22-O-methyl-26-O-( $\beta$ -D-glu)-furost-5-ene-3 $\beta$ ,22 $\xi$ ,26-triol 3-O- $\alpha$ -L-rha-(1 $\rightarrow$ 2)-O-[ $\beta$ -D-xyl-(1 $\rightarrow$ 3)]- $\beta$ -D-glucoside                                            | S <sub>14</sub> | R <sub>1</sub> = G <sub>11</sub> , R <sub>2</sub> = Me, R <sub>3</sub> = G <sub>1</sub>         |
| 68  | (25R)-26-O-( $\beta$ -D-glu)-22-methoxyfurost-5-en-3 $\beta$ -yl O- $\alpha$ -L-rha-(1 $\rightarrow$ 2)-O-[ $\beta$ -D-glu-(1 $\rightarrow$ 6)]- $\beta$ -D-glucoside                                                                 | S <sub>14</sub> | R <sub>1</sub> = G <sub>4</sub> , R <sub>2</sub> = Me, R <sub>3</sub> = G <sub>1</sub>          |
| 69  | (25R)-26-O-( $\beta$ -D-glu)-furost-5-en-3 $\beta$ ,22 $\alpha$ ,26-triol 3-O- $\alpha$ -L-rha-(1 $\rightarrow$ 2)-[ $\alpha$ -L-ara-(1 $\rightarrow$ 3)]- $\beta$ -D-glucoside                                                       | S <sub>14</sub> | R <sub>1</sub> = G <sub>5</sub> , R <sub>2</sub> = H, R <sub>3</sub> = G <sub>1</sub>           |
| 70  | (25R)-26-O-( $\beta$ -D-glu)-furost-5-en-3 $\beta$ ,22 $\alpha$ ,26-triol 3-O- $\alpha$ -L-rha-(1 $\rightarrow$ 2)-[ $\alpha$ -L-xyl-(1 $\rightarrow$ 3)]- $\beta$ -D-glucoside                                                       | S <sub>14</sub> | R <sub>1</sub> = G <sub>11</sub> , R <sub>2</sub> = H, R <sub>3</sub> = G <sub>1</sub>          |
| 71  | (25R)-26-O-( $\beta$ -D-glu)-furost-5-en-3 $\beta$ ,22 $\xi$ ,26-triol 3-O- $\alpha$ -L-rha-(1 $\rightarrow$ 2)-O-[ $\beta$ -D-glu-(1 $\rightarrow$ 4)]- $\beta$ -D-glucoside                                                         | S <sub>14</sub> | R <sub>1</sub> = G <sub>3</sub> , R <sub>2</sub> = H, R <sub>3</sub> = G <sub>1</sub>           |
| 72  | (25R)-26-O-( $\beta$ -D-glu)-22 $\alpha$ -hydroxyfurost-5-en-3 $\beta$ -yl O- $\alpha$ -L-ara-(1 $\rightarrow$ 3)-O-[ $\beta$ -D-glu-(1 $\rightarrow$ 4)]-O-[ $\alpha$ -L-rha-(1 $\rightarrow$ 2)]- $\beta$ -D-glucoside              | S <sub>14</sub> | R <sub>1</sub> = G <sub>20</sub> , R <sub>2</sub> = H, R <sub>3</sub> = G <sub>1</sub>          |
| 73  | (25R)-26-O-( $\beta$ -D-glu)-22 $\alpha$ -hydroxyfurost-5-en-3 $\beta$ -yl O- $\alpha$ -L-ara-(1 $\rightarrow$ 4)-O-[ $\beta$ -D-glu-(1 $\rightarrow$ 3)]-O-[ $\alpha$ -L-rha-(1 $\rightarrow$ 2)]- $\beta$ -D-glucoside              | S <sub>14</sub> | R <sub>1</sub> = G <sub>21</sub> , R <sub>2</sub> = H, R <sub>3</sub> = G <sub>1</sub>          |
| 74  | (25R)-26-O-( $\beta$ -D-glu)-furosta-5,20(22)-dien-3 $\beta$ -yl O- $\alpha$ -L-ara-(1 $\rightarrow$ 3)-O-[ $\beta$ -D-glu-(1 $\rightarrow$ 4)]-O-[ $\alpha$ -L-rha-(1 $\rightarrow$ 2)]- $\beta$ -D-glucoside                        | S <sub>15</sub> | R <sub>1</sub> = G <sub>20</sub> , R <sub>2</sub> = G <sub>1</sub>                              |
| 75  | (25R)-26-O-( $\beta$ -D-glu)-furosta-5,20(22)-dien-3 $\beta$ -yl O- $\alpha$ -L-ara-(1 $\rightarrow$ 4)-O-[ $\beta$ -D-glu-(1 $\rightarrow$ 3)]-O-[ $\alpha$ -L-rha-(1 $\rightarrow$ 2)]- $\beta$ -D-glucoside                        | S <sub>15</sub> | R <sub>1</sub> = G <sub>21</sub> , R <sub>2</sub> = G <sub>1</sub>                              |
| 76  | (25R)-26-O-( $\beta$ -D-glu)-5 $\alpha$ -furostan-3 $\beta$ ,22 $\xi$ -diol 3-O- $\alpha$ -L-rha-(1 $\rightarrow$ 2)-O-[ $\beta$ -D-glu-(1 $\rightarrow$ 4)]- $\beta$ -D-glucoside                                                    | S <sub>16</sub> | R <sub>1</sub> = G <sub>3</sub> , R <sub>2</sub> = G <sub>1</sub>                               |
| 77  | (25R)-22-O-methyl-26-O-acetyl-5 $\alpha$ -furost-3 $\beta$ ,14 $\alpha$ ,17 $\alpha$ ,22 $\alpha$ ,26-pentaol 3-O- $\alpha$ -L-rha-(1 $\rightarrow$ 2)- $\beta$ -D-glucoside (pardarinoside A)                                        | S <sub>17</sub> | R <sub>1</sub> = G <sub>2</sub> , R <sub>2</sub> = OH, R <sub>3</sub> = Ac                      |
| 78  | (25R)-22-O-methyl-26-O-acetyl-5 $\alpha$ -furost-3 $\beta$ ,17 $\alpha$ ,22 $\alpha$ ,26-tetraol 3-O- $\alpha$ -L-rha-(1 $\rightarrow$ 2)- $\beta$ -D-glucoside (pardarinoside B)                                                     | S <sub>17</sub> | R <sub>1</sub> = G <sub>2</sub> , R <sub>2</sub> = H, R <sub>3</sub> = Ac                       |
| 79  | (25R)-22-O-methyl-26-O-acetyl-5 $\alpha$ -furost-3 $\beta$ ,14 $\alpha$ ,17 $\alpha$ ,22 $\alpha$ ,26-pentaol 3-O- $\alpha$ -L-rha-(1 $\rightarrow$ 2)-[ $\beta$ -D-glu-(1 $\rightarrow$ 4)]- $\beta$ -D-glucoside (pardarinoside C)  | S <sub>17</sub> | R <sub>1</sub> = G <sub>3</sub> , R <sub>2</sub> = OH, R <sub>3</sub> = Ac                      |
| 80  | (25R)-22-O-methyl-26-O-acetyl-5 $\alpha$ -furost-3 $\beta$ ,17 $\alpha$ ,22 $\alpha$ ,26-tetraol 3-O- $\alpha$ -L-rha-(1 $\rightarrow$ 2)-[ $\beta$ -D-glu-(1 $\rightarrow$ 4)]- $\beta$ -D-glucoside (pardarinoside D)               | S <sub>17</sub> | R <sub>1</sub> = G <sub>3</sub> , R <sub>2</sub> = H, R <sub>3</sub> = Ac                       |
| 81  | (25R)-22-O-methyl-26-O-acetyl-5 $\alpha$ -furost-3 $\beta$ ,14 $\alpha$ ,17 $\alpha$ ,22 $\alpha$ ,26-pentaol 3-O- $\alpha$ -L-rha-(1 $\rightarrow$ 2)-[ $\alpha$ -L-ara-(1 $\rightarrow$ 3)]- $\beta$ -D-glucoside (pardarinoside F) | S <sub>17</sub> | R <sub>1</sub> = G <sub>5</sub> , R <sub>2</sub> = OH, R <sub>3</sub> = Ac                      |
| 82  | (25R)-22-O-methyl-26-O-acetyl-5 $\alpha$ -furost-3 $\beta$ ,17 $\alpha$ ,22 $\alpha$ ,26-tetraol 3-O- $\alpha$ -L-rha-(1 $\rightarrow$ 2)-[ $\alpha$ -L-ara-(1 $\rightarrow$ 3)]- $\beta$ -D-glucoside (pardarinoside G)              | S <sub>17</sub> | R <sub>1</sub> = G <sub>5</sub> , R <sub>2</sub> = H, R <sub>3</sub> = Ac                       |
| 83  | Regaloside F                                                                                                                                                                                                                          | S <sub>18</sub> | R <sub>1</sub> =OCH <sub>3</sub> , R <sub>2</sub> =3-O- $\beta$ -D-Glu-glycerol                 |
| 84  | 6'-O-feruloylsucrose                                                                                                                                                                                                                  | S <sub>18</sub> | R <sub>1</sub> =OCH <sub>3</sub> , R <sub>2</sub> =sucrose                                      |
| 85  | 3,6'-diferuloylsucrose                                                                                                                                                                                                                | S <sub>18</sub> | R <sub>1</sub> =OCH <sub>3</sub> , R <sub>2</sub> =sucrose-6'-feruloyl                          |
| 86  | 1-O-feruloylglycerol                                                                                                                                                                                                                  | S <sub>18</sub> | R <sub>1</sub> =OCH <sub>3</sub> , R <sub>2</sub> =CH <sub>2</sub> -CH(OH)-CH <sub>2</sub> (OH) |
| 87  | 1-O-p-coumaroylglycerol                                                                                                                                                                                                               | S <sub>18</sub> | R <sub>1</sub> =H, R <sub>2</sub> =CH <sub>2</sub> -CH(OH)-CH <sub>2</sub> (OH)                 |
| 88  | 1-O-caffeoylglycerol                                                                                                                                                                                                                  | S <sub>18</sub> | R <sub>1</sub> =OH, R <sub>2</sub> =CH <sub>2</sub> -CH(OH)-CH <sub>2</sub> (OH)                |
| 89  | 1-O-caffeoyl-3-O-p-coumaroylglycerol                                                                                                                                                                                                  | S <sub>19</sub> | R <sub>1</sub> =OH, R <sub>2</sub> =H                                                           |
| 90  | 1,3-O-diferuloylglycerol                                                                                                                                                                                                              | S <sub>19</sub> | R <sub>1</sub> =OCH <sub>3</sub> , R <sub>2</sub> =OCH <sub>3</sub>                             |
| 91  | 1-O-feruloyl-3-O-p-coumaroylglycerol                                                                                                                                                                                                  | S <sub>19</sub> | R <sub>1</sub> =OCH <sub>3</sub> , R <sub>2</sub> =H                                            |
| 92  | 1,3-O-di-p-coumaroylglycerol                                                                                                                                                                                                          | S <sub>19</sub> | R <sub>1</sub> =H, R <sub>2</sub> =H                                                            |
| 93  | 1,2-O-diferuloylglycerol                                                                                                                                                                                                              | S <sub>20</sub> | R <sub>1</sub> =OCH <sub>3</sub> , R <sub>2</sub> =OCH <sub>3</sub>                             |
| 94  | 1-O-feruloyl-2-O-p-coumaroylglycerol                                                                                                                                                                                                  | S <sub>20</sub> | R <sub>1</sub> =OCH <sub>3</sub> , R <sub>2</sub> =H                                            |
| 95  | 1-O-p-coumaroyl-2-O-feruloylglycerol                                                                                                                                                                                                  | S <sub>20</sub> | R <sub>1</sub> =H, R <sub>2</sub> =OCH <sub>3</sub>                                             |
| 96  | Regaloside A                                                                                                                                                                                                                          | S <sub>21</sub> | R <sub>1</sub> =H, R <sub>2</sub> =H, R <sub>3</sub> = $\beta$ -D-Glu                           |
| 97  | Regaloside B                                                                                                                                                                                                                          | S <sub>21</sub> | R <sub>1</sub> =H, R <sub>2</sub> = $\beta$ -D-Glu, R <sub>3</sub> =OCH <sub>3</sub>            |
| 98  | Regaloside D                                                                                                                                                                                                                          | S <sub>21</sub> | R <sub>1</sub> =H, R <sub>2</sub> = $\beta$ -D-Glu, R <sub>3</sub> =H                           |
| 99  | Regaloside H                                                                                                                                                                                                                          | S <sub>21</sub> | R <sub>1</sub> =H, R <sub>2</sub> =H, R <sub>3</sub> = $\beta$ -D-Glu                           |
| 100 | Regaloside C                                                                                                                                                                                                                          | S <sub>21</sub> | R <sub>1</sub> =OH, R <sub>2</sub> =H, R <sub>3</sub> = $\beta$ -D-Glu                          |
| 101 | Regaloside E                                                                                                                                                                                                                          | S <sub>21</sub> | R <sub>1</sub> =OH, R <sub>2</sub> = $\beta$ -D-Glu, R <sub>3</sub> =acetyl                     |



Table S2(continued)

| No. | Compound                                                                                                                                    | Type            | R                                                                                                          |
|-----|---------------------------------------------------------------------------------------------------------------------------------------------|-----------------|------------------------------------------------------------------------------------------------------------|
| 102 | Solamargine                                                                                                                                 | S <sub>22</sub> | R = $\alpha$ -L-Rha-(1 $\rightarrow$ 2)- $\beta$ -D-Glu                                                    |
| 103 | Khasianine                                                                                                                                  | S <sub>22</sub> | R = $\alpha$ -L-Rha-(1 $\rightarrow$ 2)-O-[ $\beta$ -D-Glu-(1 $\rightarrow$ 4)]- $\beta$ -D-Glu            |
| 104 | (22R,25R)-spirosol-5-en-3 $\beta$ -yl-O- $\alpha$ -L-Rha-(1 $\rightarrow$ 2)-6-O-acetyl- $\beta$ -D-Glc-(1 $\rightarrow$ 4)- $\beta$ -D-Glu | S <sub>22</sub> | R = $\alpha$ -L-Rha-(1 $\rightarrow$ 2)-O-[6-O-acetyl- $\beta$ -D-Glu-(1 $\rightarrow$ 4)]- $\beta$ -D-Glu |
| 105 | Jatropham                                                                                                                                   | S <sub>23</sub> | R=H                                                                                                        |
| 106 | Jatropham-5-O- $\beta$ -D-Glu                                                                                                               | S <sub>23</sub> | R= $\beta$ -D-Glu                                                                                          |
| 107 | Jatropham-5-O-[O- $\beta$ -D-Glu-(1 $\rightarrow$ 3)]- $\beta$ -D-Glu                                                                       | S <sub>23</sub> | R= $\beta$ -D-Glu-(1 $\rightarrow$ 3)- $\beta$ -D-Glu                                                      |
| 108 | Jatropham-5-O-(6-O-p-coumaroyl- $\beta$ -D-Glu)                                                                                             | S <sub>23</sub> | R=6-O-p-coumaroyl- $\beta$ -D-Glu                                                                          |
| 109 | Adenosine                                                                                                                                   | S <sub>24</sub> | R=OH                                                                                                       |
| 110 | 2'-deoxyadenosine                                                                                                                           | S <sub>24</sub> | R=H                                                                                                        |
| 111 | Colchicine                                                                                                                                  | -               | -                                                                                                          |
| 112 | Berberine                                                                                                                                   | -               | -                                                                                                          |
| 113 | Lilaline                                                                                                                                    | -               | -                                                                                                          |
| 114 | Etioline                                                                                                                                    | -               | -                                                                                                          |
| 115 | Rutin                                                                                                                                       | S <sub>25</sub> | R <sub>1</sub> =rhap-(1 $\rightarrow$ 6)-glup, R <sub>2</sub> =H, R <sub>3</sub> =OH                       |
| 116 | Quercetin                                                                                                                                   | S <sub>25</sub> | R <sub>1</sub> =H, R <sub>2</sub> =H, R <sub>3</sub> =OH                                                   |
| 117 | Dihydroquercetin                                                                                                                            | S <sub>26</sub> | R <sub>1</sub> =H, R <sub>2</sub> =H, R <sub>3</sub> =H                                                    |
| 118 | Kaempferol                                                                                                                                  | S <sub>25</sub> | R <sub>1</sub> =H, R <sub>2</sub> =OH, R <sub>3</sub> =OH                                                  |
| 119 | Myricetin                                                                                                                                   | S <sub>25</sub> | R <sub>1</sub> =OH, R <sub>2</sub> =H                                                                      |
| 120 | Dihydromyricetin                                                                                                                            | S <sub>26</sub> | R <sub>1</sub> =OH, R <sub>2</sub> =OH                                                                     |
| 121 | Eriodictyol                                                                                                                                 | S <sub>26</sub> | R <sub>1</sub> =H, R <sub>2</sub> =H                                                                       |
| 122 | Catechin                                                                                                                                    | -               | -                                                                                                          |
| 123 | Epi-catechin                                                                                                                                | -               | -                                                                                                          |
| 124 | Cyanidin 3- rutinoside                                                                                                                      | -               | -                                                                                                          |
| 125 | Phloridzin                                                                                                                                  | -               | -                                                                                                          |

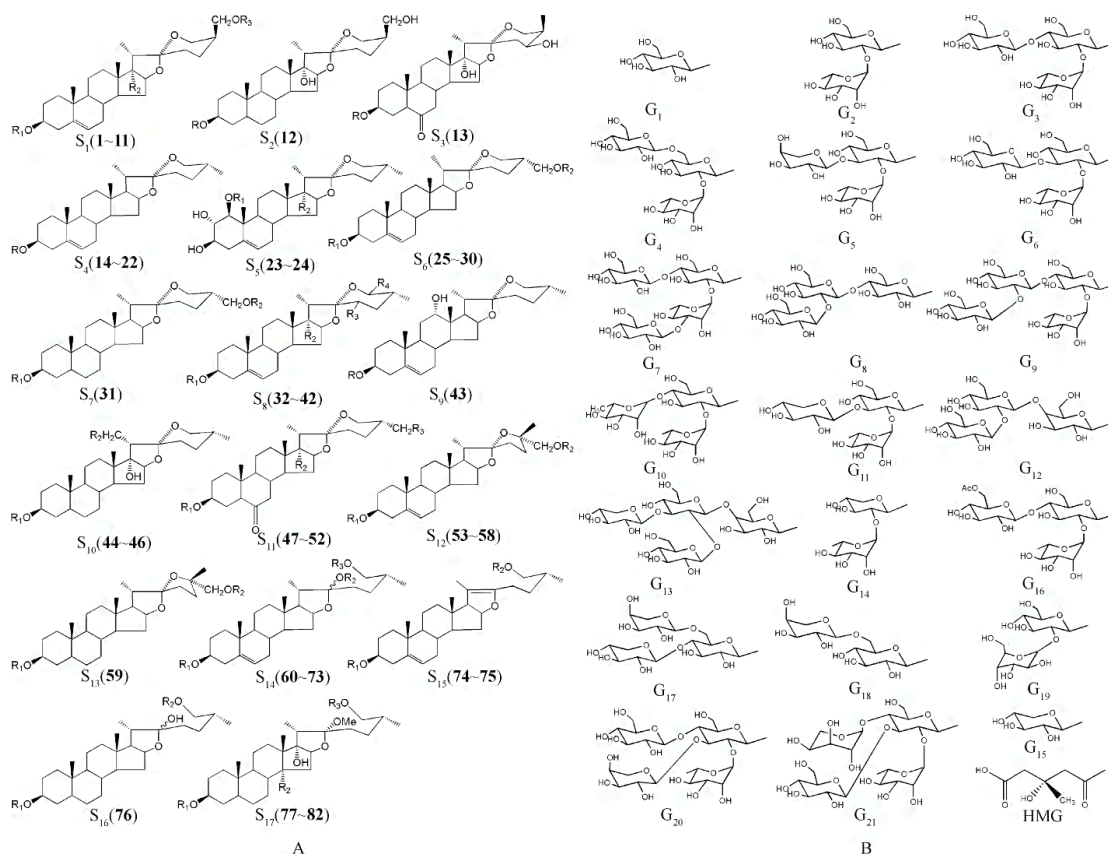Figure S3. The structure of compounds in *Lilium lancifolium* Thunb



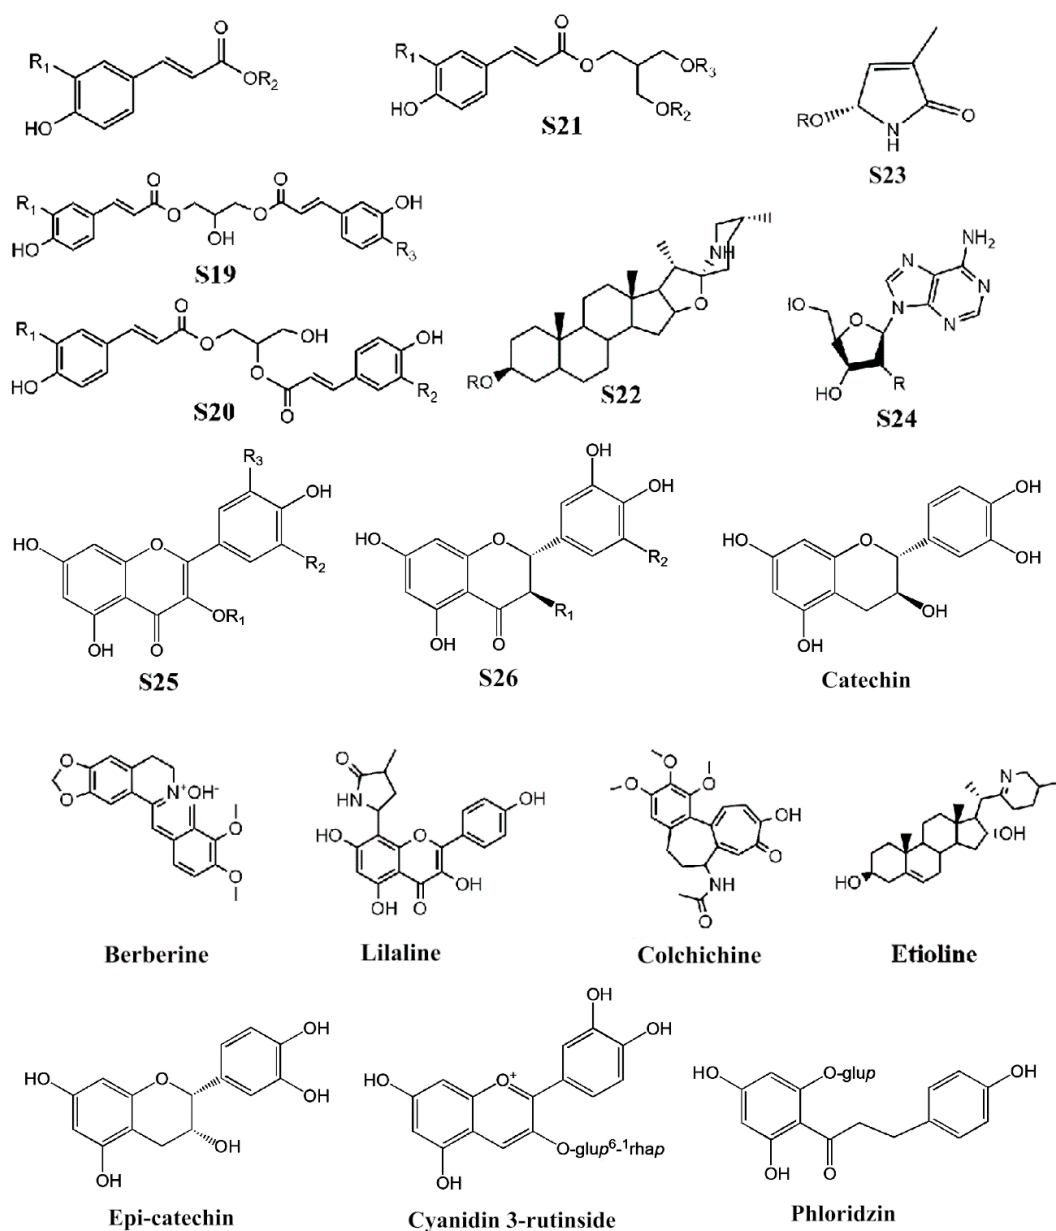

Figure S3. (continued)

Table S3 Chemical compositions in *Panax ginseng* C.A mey (Part.1)

| NO. | Compound                          | R <sub>1</sub>        | R <sub>2</sub> | R <sub>3</sub>                               | R <sub>4</sub>   | C <sub>20</sub> |
|-----|-----------------------------------|-----------------------|----------------|----------------------------------------------|------------------|-----------------|
| 1   | 20(S)-25-OCH <sub>3</sub> -PPD    | H                     | OH             | OH                                           | OCH <sub>3</sub> | S               |
| 2   | 20(R)-Protopanaxadiol             | H                     | OH             | OH                                           | CH <sub>3</sub>  | S               |
| 3   | 20(S)- Protopanaxadiol            | H                     | OH             | CH <sub>3</sub>                              | OH               | R               |
| 4   | Ginsenoside Ra <sub>1</sub>       | Glc <sup>2</sup> -Glc | OH             | O-Glc <sup>6</sup> -Ara(p) <sup>4</sup> -Xyl | CH <sub>3</sub>  | S               |
| 5   | Ginsenoside Ra <sub>2</sub>       | Glc <sup>2</sup> -Glc | OH             | O-Glc <sup>6</sup> -Ara(f) <sup>2</sup> -Xyl | CH <sub>3</sub>  | S               |
| 6   | Ginsenoside Ra <sub>3</sub>       | Glc <sup>2</sup> -Glc | OH             | O-Glc <sup>6</sup> -Glc <sup>3</sup> -Xyl    | CH <sub>3</sub>  | S               |
| 7   | Ginsenosides Ra <sub>4</sub>      | S5                    | OH             | O-Glc <sup>6</sup> -Ara(p) <sup>4</sup> -Xyl | CH <sub>3</sub>  | S               |
| 8   | Ginsenosides Ra <sub>5</sub>      | S6                    | OH             | O-Glc <sup>6</sup> -Ara(p) <sup>4</sup> -Xyl | CH <sub>3</sub>  | S               |
| 9   | Ginsenosides Ra <sub>6</sub>      | S5                    | OH             | O-Glc <sup>6</sup> -Glc                      | CH <sub>3</sub>  | S               |
| 10  | Ginsenosides Ra <sub>7</sub>      | S5                    | OH             | OGlc <sup>6</sup> -Ara(f)                    | CH <sub>3</sub>  | S               |
| 11  | Ginsenosides Ra <sub>8</sub>      | S7                    | OH             | OGlc <sup>6</sup> -Ara(f)                    | CH <sub>3</sub>  | S               |
| 12  | Ginsenosides Ra <sub>9</sub>      | S5                    | OH             | OGlc <sup>6</sup> -Ara(f)                    | CH <sub>3</sub>  | S               |
| 13  | Ginsenoside Rb <sub>1</sub>       | Glc <sup>2</sup> -Glc | OH             | O-Glc <sup>6</sup> -Glc                      | CH <sub>3</sub>  | S               |
| 14  | Ginsenoside Rb <sub>2</sub>       | Glc <sup>2</sup> -Glc | OH             | O-Glc <sup>6</sup> -Ara(p)                   | CH <sub>3</sub>  | S               |
| 15  | Ginsenoside Rb <sub>3</sub>       | Glc <sup>2</sup> -Glc | OH             | O-Glc <sup>6</sup> -Xyl                      | CH <sub>3</sub>  | S               |
| 16  | Ginsenoside Rc                    | Glc <sup>2</sup> -Glc | OH             | O-Glc <sup>6</sup> -Ara(f)                   | CH <sub>3</sub>  | S               |
| 17  | Ginsenoside Rd                    | Glc <sup>2</sup> -Glc | OH             | O-Glc                                        | CH <sub>3</sub>  | S               |
| 18  | 20(S)-Ginsenoside Rg <sub>3</sub> | Glc <sup>2</sup> -Glc | OH             | OH                                           | CH <sub>3</sub>  | S               |
| 19  | 20(R)-Ginsenoside Rg <sub>3</sub> | Glc <sup>2</sup> -Glc | OH             | CH <sub>3</sub>                              | OH               | R               |
| 20  | 20(S)-ginsenoside Rh <sub>2</sub> | Glc                   | OH             | OH                                           | CH <sub>3</sub>  | S               |
| 21  | 20(R)-ginsenoside Rh <sub>2</sub> | Glc                   | OH             | CH <sub>3</sub>                              | OH               | R               |
| 22  | Ginsenoside F <sub>2</sub>        | Glc                   | OH             | O-Glc                                        | CH <sub>3</sub>  | S               |
| 23  | Ginsenoside Mc                    | H                     | OH             | O-Glc <sup>6</sup> -Ara(f)                   | CH <sub>3</sub>  | S               |



Table S3(continued)

| NO. | Compound                                   | R <sub>1</sub>                                        | R <sub>2</sub> | R <sub>3</sub>                               | R <sub>4</sub>  | C <sub>20</sub> |
|-----|--------------------------------------------|-------------------------------------------------------|----------------|----------------------------------------------|-----------------|-----------------|
| 22  | Ginsenoside F <sub>2</sub>                 | Glc                                                   | OH             | O-Glc                                        | CH <sub>3</sub> | S               |
| 23  | Ginsenoside Mc                             | H                                                     | OH             | O-Glc <sup>6</sup> -Ara(f)                   | CH <sub>3</sub> | S               |
| 24  | Ginsenoside R <sub>S2</sub>                | Glc <sup>2</sup> -Glc <sup>6</sup> -AC                | OH             | O-Glc <sup>2</sup> -Ara(f)                   | CH <sub>3</sub> | S               |
| 25  | Ginsenoside R <sub>S3</sub>                | Glc <sup>2</sup> -Glc <sup>6</sup> -(6-O-AC)          | OH             | OH                                           | CH <sub>3</sub> | S               |
| 26  | 6 <sup>o</sup> -Acetyl-ginsenoside-Rd      | Glc <sup>2</sup> -Glc <sup>6</sup> -COCH <sub>3</sub> | OH             | O-Glc                                        | CH <sub>3</sub> | S               |
| 27  | Malonyl ginsenoside R <sub>A3</sub>        | Glc <sup>2</sup> -Glc-COCOCH <sub>2</sub> O           | OH             | O-Glc <sup>6</sup> -Glc <sup>3</sup> -Xyl    | CH <sub>3</sub> | S               |
| 28  | Malonyl ginsenoside R <sub>B1</sub>        | Glc <sup>2</sup> -Glc <sup>6</sup> -(6-O-Mal)         | OH             | O-Glc <sup>6</sup> -Glc                      | CH <sub>3</sub> | S               |
| 29  | Malonyl ginsenoside R <sub>B2</sub>        | Glc <sup>2</sup> -Glc <sup>6</sup> -(6-O-Mal)         | OH             | O-Glc <sup>6</sup> -Ara(p)                   | CH <sub>3</sub> | S               |
| 30  | Malonyl ginsenoside Rc                     | Glc <sup>2</sup> -Glc <sup>6</sup> -(6-O-Mal)         | OH             | O-Glc <sup>6</sup> -Ara(f)                   | CH <sub>3</sub> | S               |
| 31  | Malonyl ginsenoside Rd                     | Glc <sup>2</sup> -Glc <sup>6</sup> -(6-O-Mal)         | OH             | O-Glc                                        | CH <sub>3</sub> | S               |
| 32  | Malonyl notoginsenoside R <sub>4</sub>     | Glc <sup>2</sup> -(6-Mal)Glc                          | OH             | O-Glc <sup>6</sup> -Glc <sup>6</sup> -Xyl    | CH <sub>3</sub> | S               |
| 33  | Notoginsenoside Fa                         | Glc <sup>2</sup> -Glc <sup>2</sup> -Xyl               | OH             | O-Glc <sup>6</sup> -Glc                      | CH <sub>3</sub> | S               |
| 34  | Notoginsenoside Fc                         | Glc <sup>2</sup> -Glc <sup>2</sup> -Xyl               | OH             | O-Glc <sup>6</sup> -Xyl                      | CH <sub>3</sub> | S               |
| 35  | Notoginsenoside Fe                         | Glc                                                   | OH             | O-Glc <sup>6</sup> -Ara(p)                   | CH <sub>3</sub> | S               |
| 36  | Notoginsenoside Ft <sub>1</sub>            | Glc <sup>2</sup> -Glc <sup>2</sup> -Xyl               | OH             | OH                                           | CH <sub>3</sub> | S               |
| 37  | Notoginsenoside FP <sub>2</sub>            | Glc <sup>2</sup> -Glc <sup>2</sup> -Xyl               | OH             | O-Glc <sup>6</sup> -Ara(p)                   | CH <sub>3</sub> | S               |
| 38  | Notoginsenoside D                          | Glc <sup>2</sup> -Glc <sup>2</sup> -Xyl               | OH             | O-Glc <sup>6</sup> -Glc <sup>6</sup> -Xyl    | CH <sub>3</sub> | S               |
| 39  | Notoginsenoside K                          | Glc <sup>6</sup> -Glc                                 | OH             | O-Glc                                        | CH <sub>3</sub> | S               |
| 40  | Notoginsenoside L                          | Glc <sup>2</sup> -Xyl                                 | OH             | O-Glc <sup>6</sup> -Glc                      | CH <sub>3</sub> | S               |
| 41  | Notoginsenoside O                          | Glc                                                   | OH             | O-Glc <sup>6</sup> -Xyl <sup>3</sup> -Xyl    | CH <sub>3</sub> | S               |
| 42  | Notoginsenoside P                          | Glc                                                   | OH             | O-Glc <sup>6</sup> -Xyl <sup>4</sup> -Xyl    | CH <sub>3</sub> | S               |
| 43  | Notoginsenoside Q                          | Glc <sup>2</sup> -Glc <sup>2</sup> -Xyl               | OH             | O-Glc <sup>6</sup> -Xyl <sup>4</sup> -Xyl    | CH <sub>3</sub> | S               |
| 44  | Notoginsenoside S                          | Glc <sup>2</sup> -Glc <sup>2</sup> -Xyl               | OH             | O-Glc <sup>6</sup> -Ara(f) <sup>5</sup> -Xyl | CH <sub>3</sub> | S               |
| 45  | Notoginsenoside T                          | Glc <sup>2</sup> -Glc <sup>2</sup> -Xyl               | OH             | O-Glc <sup>6</sup> -Glc <sup>3</sup> -Xyl    | CH <sub>3</sub> | S               |
| 46  | Notoginsenoside R <sub>4</sub>             | Glc <sup>2</sup> -Glc                                 | OH             | O-Glc <sup>6</sup> -Glc <sup>6</sup> -Xyl    | CH <sub>3</sub> | S               |
| 47  | Notoginsenoside ST <sub>4</sub>            | Glc <sup>2</sup> -Glc <sup>2</sup> -Xyl               | OH             | OH                                           | CH <sub>3</sub> | S               |
| 48  | Notoginsenoside FZ                         | Glc <sup>2</sup> -Glc <sup>2</sup> -Xyl               | OH             | O-Glc <sup>6</sup> -Ara(p)                   | CH <sub>3</sub> | S               |
| 49  | Notoginsenoside Fh <sub>1</sub>            | Glc <sup>2</sup> -Glc <sup>2</sup> -Xyl               | OH             | O-Glc <sup>6</sup> -Ara(p) <sup>4</sup> -Xyl | CH <sub>3</sub> | S               |
| 50  | Notoginsenoside L <sub>5</sub>             | S4                                                    | OH             | O-Glc <sup>6</sup> -Ara(f)                   | CH <sub>3</sub> | S               |
| 51  | Notoginsenoside L <sub>6</sub>             | S4                                                    | OH             | O-Glc <sup>6</sup> -Ara(p)                   | CH <sub>3</sub> | S               |
| 52  | Notoginsenoside L <sub>7</sub>             | S4                                                    | OH             | O-Glc <sup>6</sup> -Xyl                      | CH <sub>3</sub> | S               |
| 53  | Notoginsenoside L <sub>8</sub>             | S4                                                    | OH             | O-Glc <sup>6</sup> -Glc                      | CH <sub>3</sub> | S               |
| 54  | Gypenoside IX                              | Glc                                                   | OH             | O-Glc <sup>6</sup> -Xyl                      | CH <sub>3</sub> | S               |
| 55  | Gypenoside V                               | Glc <sup>2</sup> -Glc                                 | OH             | O-Glc <sup>6</sup> -Rha                      | CH <sub>3</sub> | S               |
| 56  | Gypenoside XVII                            | Glc                                                   | OH             | O-Glc <sup>6</sup> -Glc                      | CH <sub>3</sub> | S               |
| 57  | Gypenoside XIII                            | H                                                     | OH             | O-Glc <sup>6</sup> -Xyl                      | CH <sub>3</sub> | S               |
| 58  | Chikusetsusaponin VI                       | Glc-Xyl <sup>6</sup> -Xyl                             | OH             | O-Glc-Glc <sup>6</sup>                       | CH <sub>3</sub> | S               |
| 59  | Chikusetsusaponin III                      | Glc-Glc <sup>6</sup> -Xyl                             | OH             | OH                                           | CH <sub>3</sub> | S               |
| 60  | Chikusetsusaponin VII                      | Glc <sup>6</sup> -Xyl                                 | OH             | O-Glc <sup>6</sup> -Glc                      | CH <sub>3</sub> | S               |
| 61  | Chikusetsusaponin FK <sub>4</sub>          | Xyl <sup>1-6</sup> Glc <sup>2</sup> -Glc              | OH             | O-Glc <sup>6</sup> -Ara(f)                   | CH <sub>3</sub> | S               |
| 62  | Chikusetsusaponin FK <sub>5</sub>          | Xyl <sup>1-6</sup> Glc <sup>2</sup> -Glc              | OH             | O-Glc <sup>6</sup> -Xyl                      | CH <sub>3</sub> | S               |
| 63  | Chikusetsusaponin FK <sub>6</sub>          | Xyl <sup>1-6</sup> Glc <sup>2</sup> -Glc              | OH             | O-Glc                                        | CH <sub>3</sub> | S               |
| 64  | Chikusetsusaponin FK <sub>7</sub>          | Glc <sup>2</sup> -Glc                                 | O-Glc          | OH                                           | CH <sub>3</sub> | S               |
| 65  | Quinquenoside I                            | S1                                                    | OH             | O-Glc                                        | CH <sub>3</sub> | S               |
| 66  | Quinquenoside II                           | S2                                                    | OH             | O-Glc <sup>6</sup> -Glc                      | CH <sub>3</sub> | S               |
| 67  | Quinquenoside III                          | S3                                                    | OH             | O-Glc                                        | CH <sub>3</sub> | S               |
| 68  | Quinquenoside V                            | Glc <sup>2</sup> -Glc                                 | OH             | O-Glc <sup>6</sup> -Glc <sup>4</sup> -Glc    | CH <sub>3</sub> | S               |
| 69  | Quinquenoside L <sub>2</sub>               | Glc <sup>2</sup> -Glc                                 | OH             | O-Glc                                        | CH <sub>3</sub> | S               |
| 70  | Quinquenosides L <sub>10</sub>             | Glc                                                   | OH             | O-Glc <sup>6</sup> -Ara(p)                   | CH <sub>3</sub> | S               |
| 71  | Quinquenosides L <sub>14</sub>             | Glc <sup>2</sup> -Glc                                 | OH             | O-Ara(p)                                     | CH <sub>3</sub> | S               |
| 72  | Quinquenosides L <sub>16</sub>             | Glc <sup>2</sup> -Glc                                 | OH             | O-Glc <sup>6</sup> -Glc                      | CH <sub>3</sub> | S               |
| 73  | Compound O                                 | Glc                                                   | OH             | O-Glc <sup>2</sup> -Ara(p)                   | CH <sub>3</sub> | S               |
| 74  | Compound K                                 | H                                                     | OH             | O-Glc                                        | CH <sub>3</sub> | S               |
| 75  | Compound Y                                 | H                                                     | OH             | OH                                           | CH <sub>3</sub> | S               |
| 76  | Pseu-ginsenoside Rc <sub>1</sub>           | Glc <sup>2</sup> -Glc <sup>6</sup> -AC                | OH             | O-Glc                                        | CH <sub>3</sub> | S               |
| 77  | Yesanchnoside J                            | Glc <sup>2</sup> -Glc <sup>6</sup> -AC                | OH             | O-Glc <sup>6</sup> -Glc <sup>6</sup> -Xyl    | CH <sub>3</sub> | S               |
| 78  | Vinaginsenoside R <sub>16</sub>            | Glc <sup>2</sup> -Xyl                                 | O-Glc          | OH                                           | CH <sub>3</sub> | S               |
| 79  | Vinaginsenoside R <sub>3</sub>             | Glc <sup>2</sup> -Glc                                 | H              | O-Glc                                        | CH <sub>3</sub> | S               |
| 80  | Quinquenoside Jb                           | Glc <sup>2</sup> -Glc                                 | OH             | O-Glc <sup>6</sup> -Glc <sup>6</sup> -Ara(f) | CH <sub>3</sub> | S               |
| 81  | 20(R)methoxyl-ginsenoside R <sub>83</sub>  | Glc <sup>2</sup> -Glc                                 | OH             | OCH <sub>3</sub>                             | CH <sub>3</sub> | R               |
| 82  | 20(S)methoxyl-ginsenoside R <sub>83</sub>  | Glc <sup>2</sup> -Glc                                 | OH             | OCH <sub>3</sub>                             | CH <sub>3</sub> | S               |
| 83  | Malonyl-floralginsenosides R <sub>B1</sub> | Glc <sup>2</sup> -Glc                                 | H              | O-Glc <sup>6</sup> -(4-Mal)Glc               | CH <sub>3</sub> | S               |
| 84  | Malonyl-floralginsenosides R <sub>B2</sub> | Glc <sup>2</sup> -(3-Mal)Glc                          | H              | O-Glc <sup>6</sup> -Glc                      | CH <sub>3</sub> | S               |
| 85  | Malonyl-floralginsenosides R <sub>D1</sub> | Glc <sup>2</sup> -(2-Mal)Glc                          | H              | O-Glc                                        | CH <sub>3</sub> | S               |
| 86  | Malonyl-floralginsenosides R <sub>D2</sub> | Glc <sup>2</sup> -(3-Mal)Glc                          | H              | O-Glc                                        | CH <sub>3</sub> | S               |
| 87  | Malonyl-floralginsenosides R <sub>D3</sub> | Glc <sup>2</sup> -(4-Mal)Glc                          | H              | O-Glc                                        | CH <sub>3</sub> | S               |
| 88  | Malonyl-floralginsenosides R <sub>D4</sub> | Glc <sup>2</sup> -Glc                                 | H              | O-(3-Mal)Glc                                 | CH <sub>3</sub> | S               |
| 89  | Malonyl-floralginsenosides R <sub>D5</sub> | Glc <sup>2</sup> -Glc                                 | H              | O-(6-Mal)Glc                                 | CH <sub>3</sub> | S               |
| 90  | Malonyl-floralginsenosides R <sub>D6</sub> | Glc <sup>2</sup> -(6-Mal)Glc                          | H              | O-(6-Mal)Glc                                 | CH <sub>3</sub> | S               |
| 91  | Malonyl-floralginsenosides Rc <sub>1</sub> | Glc <sup>2</sup> -(6-Mal)Glc                          | H              | O-Glc <sup>6</sup> -Xyl                      | CH <sub>3</sub> | S               |
| 92  | Malonyl-floralginsenosides Rc <sub>2</sub> | Glc <sup>2</sup> -(4-Mal)Glc                          | H              | O-Glc <sup>6</sup> -Ara(p)                   | CH <sub>3</sub> | S               |
| 93  | Malonyl-floralginsenosides Rc <sub>3</sub> | Glc <sup>2</sup> -(3-Mal)Glc                          | H              | O-Glc <sup>6</sup> -Ara(p)                   | CH <sub>3</sub> | S               |
| 94  | Malonyl-floralginsenosides Rc <sub>4</sub> | Glc <sup>2</sup> -(3-Mal)Glc                          | H              | O-Glc <sup>6</sup> -Ara(f)                   | CH <sub>3</sub> | S               |

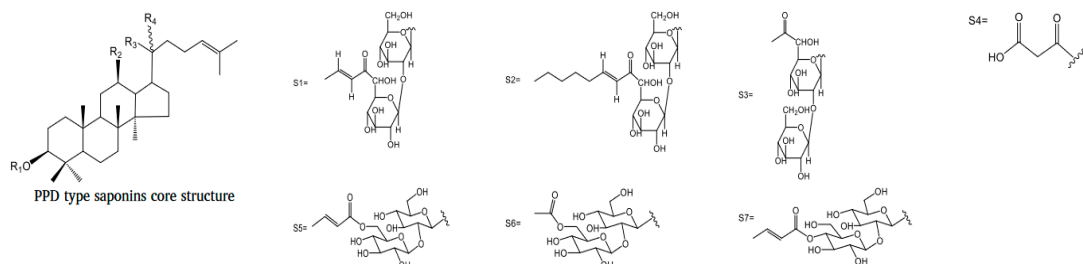Figure S4. The structure of compounds in *Panax ginseng* C.A mey(Part.1)



Table S4 Chemical compositions in *Panax ginseng* C.A mey (Part.2)

| NO. | Compound                                                                                                                        | R <sub>1</sub>                         | R <sub>2</sub>                          | R <sub>3</sub> | R <sub>4</sub>                                  | R <sub>5</sub>          |
|-----|---------------------------------------------------------------------------------------------------------------------------------|----------------------------------------|-----------------------------------------|----------------|-------------------------------------------------|-------------------------|
| 95  | 20(S)- protopanaxatriol                                                                                                         | H                                      | H                                       | H              | OH                                              | CH <sub>3</sub>         |
| 96  | 20(R)-protopanaxatriol                                                                                                          | H                                      | H                                       | H              | CH <sub>3</sub>                                 | OH                      |
| 97  | Ginsenoside Rg <sub>1</sub>                                                                                                     | H                                      | Glc                                     | H              | O-Glc                                           | CH <sub>3</sub>         |
| 98  | 20(S)-ginsenoside Rg <sub>2</sub>                                                                                               | H                                      | Glc <sup>6</sup> -Rha                   | H              | OH                                              | CH <sub>3</sub>         |
| 99  | 20(R)-ginsenoside Rg <sub>2</sub>                                                                                               | H                                      | Glc <sup>6</sup> -Rha                   | H              | CH <sub>3</sub>                                 | OH                      |
| 100 | 20(S)-ginsenoside Rh <sub>1</sub>                                                                                               | H                                      | Glc                                     | H              | OH                                              | CH <sub>3</sub>         |
| 101 | 20(R)-ginsenoside Rh <sub>1</sub>                                                                                               | H                                      | Glc                                     | H              | CH <sub>3</sub>                                 | OH                      |
| 102 | Ginsenoside Rf                                                                                                                  | H                                      | Glc <sup>2</sup> -Glc                   | H              | OH                                              | CH <sub>3</sub>         |
| 103 | Ginsenoside F <sub>1</sub>                                                                                                      | H                                      | H                                       | H              | O-Glc                                           | CH <sub>3</sub>         |
| 104 | Ginsenoside Re                                                                                                                  | H                                      | Glc <sup>2</sup> -Rha                   | H              | O-Glc                                           | CH <sub>3</sub>         |
| 105 | Ginsenoside Re <sub>1</sub>                                                                                                     | H                                      | Glc                                     | H              | O-Glc <sup>2</sup> -Glc                         | CH <sub>3</sub>         |
| 106 | Ginsenoside Re <sub>2</sub>                                                                                                     | H                                      | Glc <sup>2</sup> -Glc                   | H              | O-Glc                                           | CH <sub>3</sub>         |
| 107 | Ginsenoside Re <sub>3</sub>                                                                                                     | H                                      | Glc                                     | H              | O-Glc <sup>4</sup> -Glc                         | CH <sub>3</sub>         |
| 108 | Ginsenoside Re <sub>4</sub>                                                                                                     | H                                      | Glc                                     | H              | O-Glc <sup>6</sup> -Ara(f)                      | CH <sub>3</sub>         |
| 109 | Ginsenoside F <sub>3</sub>                                                                                                      | H                                      | H                                       | H              | O-Glc <sup>6</sup> -Ara(p)                      | CH <sub>3</sub>         |
| 110 | Ginsenoside F <sub>5</sub>                                                                                                      | H                                      | H                                       | H              | O-Glc <sup>6</sup> -Ara(f)                      | CH <sub>3</sub>         |
| 111 | Ginsenoside Rh <sub>24</sub>                                                                                                    | H                                      | Ara(p) <sup>6</sup> -Rha                | H              | O-Glc                                           | CH <sub>3</sub>         |
| 112 | Ginsenoside Rg <sub>16</sub>                                                                                                    | H                                      | Glc                                     | H              | O-Glc <sup>2</sup> -Rha                         | CH <sub>3</sub>         |
| 113 | Ginsenoside Rs <sub>11</sub>                                                                                                    | H                                      | Glc <sup>2</sup> -OGlc <sup>6</sup> -AC | H              | O-Glc <sup>6</sup> -Ara(f)                      | CH <sub>3</sub>         |
| 114 | Ginsenoside Rh <sub>25</sub>                                                                                                    | O-Xyl-Glc <sup>2</sup>                 | H                                       | H              | O-Ara-Glc <sup>6</sup>                          | CH <sub>3</sub>         |
| 115 | Ginsenoside Rh <sub>26</sub>                                                                                                    | O-(E)-but-2-enoyl-Glc-Glc <sup>2</sup> | H                                       | H              | O-Glc                                           | CH <sub>3</sub>         |
| 116 | Ginsenoside Re <sub>5</sub>                                                                                                     | H                                      | Glc <sup>2</sup> -Glc                   | H              | OH                                              | CH <sub>3</sub>         |
| 117 | Ginsenoside Mb                                                                                                                  | Glc                                    | H                                       | H              | O-Glc <sup>6</sup> -Ara(p)                      | CH <sub>3</sub>         |
| 118 | 20(R)-ginsenoside Rh <sub>10</sub>                                                                                              | Glc                                    | H                                       | H              | CH <sub>3</sub>                                 | OH                      |
| 119 | Notoginsenoside R <sub>1</sub>                                                                                                  | H                                      | Glc <sup>2</sup> -Xyl                   | H              | O-Glc                                           | CH <sub>3</sub>         |
| 120 | 20(R)-Notoginsenoside R <sub>2</sub>                                                                                            | H                                      | Glc <sup>2</sup> -Xyl                   | H              | CH <sub>3</sub>                                 | OH                      |
| 121 | Notoginsenoside R <sub>3</sub>                                                                                                  | H                                      | Glc                                     | H              | O-Glc <sup>6</sup> -Glc                         | CH <sub>3</sub>         |
| 122 | Notoginsenoside R <sub>6</sub>                                                                                                  | H                                      | Glc                                     | H              | O-Glc <sup>6</sup> -Glc*                        | CH <sub>3</sub>         |
| 123 | Notoginsenoside N                                                                                                               | H                                      | Glc <sup>4</sup> -Glc*                  | H              | O-Glc                                           | CH <sub>3</sub>         |
| 124 | Notoginsenoside Rt                                                                                                              | H                                      | Glc <sup>6</sup> -OAC                   | H              | O-Glc                                           | CH <sub>3</sub>         |
| 125 | Notoginsenoside FP <sub>1</sub>                                                                                                 | H                                      | Glc                                     | H              | O-Glc <sup>6</sup> -Ara(p)                      | CH <sub>3</sub>         |
| 126 | Notoginsenoside RW <sub>1</sub>                                                                                                 | H                                      | Xyl                                     | H              | O-Glc <sup>6</sup> -Xyl                         | CH <sub>3</sub>         |
| 127 | Notoginsenoside Fh <sub>7</sub>                                                                                                 | H                                      | Glc <sup>2</sup> -Glc                   | H              | O-Glc <sup>6</sup> -Glc                         | CH <sub>3</sub>         |
| 128 | Notoginsenoside M                                                                                                               | H                                      | Glc <sup>6</sup> -Glc*                  | H              | O-Glc                                           | CH <sub>3</sub>         |
| 129 | Notoginsenoside L <sub>4</sub>                                                                                                  | SI'                                    | H                                       | H              | O-Glc                                           | OH                      |
| 130 | Notoginsenoside L <sub>9</sub>                                                                                                  | S4                                     | H                                       | H              | O-Glc <sup>6</sup> -Ara(f)                      | CH <sub>3</sub>         |
| 131 | Notoginsenoside L <sub>10</sub>                                                                                                 | S4                                     | H                                       | H              | O-Glc <sup>6</sup> -Ara(p)                      | CH <sub>3</sub>         |
| 132 | Notoginsenoside L <sub>11</sub>                                                                                                 | S4                                     | H                                       | H              | O-Glc <sup>6</sup> -Xyl                         | CH <sub>3</sub>         |
| 133 | Notoginsenoside L <sub>12</sub>                                                                                                 | S4                                     | H                                       | H              | O-Glc <sup>6</sup> -Glc                         | CH <sub>3</sub>         |
| 134 | Chikusetsusaponin LM <sub>1</sub>                                                                                               | H                                      | H                                       | H              | O-Glc <sup>6</sup> -Xyl                         | CH <sub>3</sub>         |
| 135 | Chikusetsusaponin LM <sub>2</sub>                                                                                               | H                                      | H                                       | H              | O-Glc <sup>6</sup> -Xyl <sup>2</sup> -Xyl       | CH <sub>3</sub>         |
| 136 | Chikusetsusaponin LM <sub>3</sub>                                                                                               | H                                      | H                                       | H              | O-Glc <sup>6</sup> -Ara(p) <sup>4</sup> -Xyl    | CH <sub>3</sub>         |
| 137 | Chikusetsusaponin LM <sub>4</sub>                                                                                               | Glc <sup>2</sup> -Glc                  | H                                       | Glc            | OH                                              | CH <sub>3</sub>         |
| 138 | Chikusetsusaponin LM <sub>5</sub>                                                                                               | Glc <sup>2</sup> -Glc                  | H                                       | H              | O-Glc <sup>6</sup> -Ara(f)                      | CH <sub>3</sub>         |
| 139 | Chikusetsusaponin LM <sub>6</sub>                                                                                               | Glc <sup>2</sup> -Glc                  | H                                       | H              | O-Glc <sup>6</sup> -Ara(p) <sup>4</sup> -Ara(f) | CH <sub>3</sub>         |
| 140 | Chikusetsusaponin FK <sub>1</sub>                                                                                               | Glc <sup>2</sup> -Rha                  | Glc                                     | H              | CH <sub>3</sub>                                 | CH <sub>3</sub>         |
| 141 | Chikusetsusaponin L <sub>10</sub>                                                                                               | H                                      | H                                       | Glc            | OH                                              | CH <sub>3</sub>         |
| 142 | Chikusetsusaponin L <sub>5</sub>                                                                                                | H                                      | H                                       | H              | O-Glc <sup>6</sup> -Ara(p) <sup>4</sup> -Xyl    | CH <sub>3</sub>         |
| 143 | 3-acetyl ginsenoside F <sub>1</sub>                                                                                             | AC                                     | H                                       | H              | O-Glc                                           | CH <sub>3</sub>         |
| 144 | 6'-acetyl-ginsenoside F <sub>1</sub>                                                                                            | H                                      | H                                       | H              | O-Glc <sup>6</sup> -AC                          | CH <sub>3</sub>         |
| 145 | 3β-acetoxyl ginsenoside F <sub>1</sub>                                                                                          | COO                                    | H                                       | H              | O-Glc                                           | CH <sub>3</sub>         |
| 146 | 6'-acetyl ginsenoside Rg <sub>3</sub>                                                                                           | H                                      | Glc <sup>2</sup> -Glc <sup>2</sup>      | H              | O-Glc <sup>6</sup> -AC                          | CH <sub>3</sub>         |
| 147 | 20-O-Gluco-ginsenoside R <sub>3</sub>                                                                                           | H                                      | Glc <sup>2</sup> -Glc                   | H              | O-Glc                                           | CH <sub>3</sub>         |
| 148 | 6'-malonyl formyl-ginsenoside F <sub>1</sub>                                                                                    | H                                      | H                                       | H              | O-Glc                                           | CH <sub>3</sub>         |
| 149 | 6'-emalonyl formyl ginsenoside F <sub>1</sub>                                                                                   | H                                      | H                                       | H              | SZ'                                             | CH <sub>3</sub>         |
| 150 | Pseudoginsenoside RT <sub>3</sub>                                                                                               | H                                      | Xvl                                     | H              | O-Glc                                           | CH <sub>3</sub>         |
| 151 | Pseudo-ginsenosides F <sub>8</sub>                                                                                              | AC <sup>6</sup> Glc <sup>2</sup> -Glc  | H                                       | H              | O-Glc <sup>6</sup> -Xyl                         | CH <sub>3</sub>         |
| 152 | Pseudoginsenoside Rs <sub>1</sub>                                                                                               | AC <sup>6</sup> Glc <sup>2</sup> -Rha  | H                                       | H              | O-CH <sub>3</sub>                               | CH <sub>3</sub>         |
| 153 | Floralginsenosides E                                                                                                            | H                                      | Glc <sup>2</sup> -Rha                   | H              | O-Glc <sup>6</sup> -Xyl                         | CH <sub>3</sub>         |
| 154 | Floralginsenoside M                                                                                                             | H                                      | Glc <sup>2</sup> -Rha                   | H              | O-Glc <sup>6</sup> -Ara(f)                      | CH <sub>3</sub>         |
| 155 | Floralginsenoside N                                                                                                             | H                                      | Glc <sup>2</sup> -Rha                   | H              | O-Glc <sup>6</sup> -Ara(p)                      | CH <sub>3</sub>         |
| 156 | Floralginsenoside P                                                                                                             | Glc <sup>2</sup> -Glc                  | H                                       | H              | O-Glc <sup>6</sup> -Ara(p)                      | CH <sub>3</sub>         |
| 157 | Quinquenoside L <sub>17</sub>                                                                                                   | H                                      | Glc                                     | H              | O-Glc <sup>6</sup> -Xyl                         | CH <sub>3</sub>         |
| 158 | Quinquenoside R <sub>1</sub>                                                                                                    | Glc <sup>2</sup> -Glc <sup>6</sup> -AC | H                                       | H              | O-Glc <sup>6</sup> -Glc                         | CH <sub>3</sub>         |
| 159 | Koryoginsenoside R <sub>1</sub>                                                                                                 | H                                      | Glc <sup>6</sup> -Bu                    | H              | O-Glc                                           | CH <sub>3</sub>         |
| 160 | 20(S)-sanchirrhinosides A <sub>1</sub>                                                                                          | H                                      | S3'                                     | H              | OH                                              | CH <sub>3</sub>         |
| 161 | 20(S)-sanchirrhinosides A <sub>2</sub>                                                                                          | H                                      | S4'                                     | H              | OH                                              | CH <sub>3</sub>         |
| 162 | 20(S)-sanchirrhinosides A <sub>3</sub>                                                                                          | H                                      | Glc                                     | H              | O-Ara(p)                                        | CH <sub>3</sub>         |
| 163 | 20(S)-sanchirrhinosides A <sub>4</sub>                                                                                          | H                                      | Ara(p)                                  | H              | O-Glc                                           | CH <sub>3</sub>         |
| 164 | 20(S)-sanchirrhinosides A <sub>5</sub>                                                                                          | H                                      | Glc <sup>2</sup> -Ara(f)                | H              | O-Glc                                           | CH <sub>3</sub>         |
| 165 | 20(S)-sanchirrhinosides A <sub>6</sub>                                                                                          | II                                     | Glc <sup>2</sup> -Xyl                   | II             | O-Glc <sup>6</sup> -Glc                         | CH <sub>3</sub>         |
| 166 | 6α-acetoxy-3β,12β,20R-trihydroxydammar-24-ene                                                                                   | H                                      | OAC                                     | H              | CH <sub>3</sub>                                 | OH                      |
| 167 | 3-O-β-D-glucopyranosyl-20(S)-protopanaxatriol                                                                                   | Glc                                    | H                                       | H              | OH                                              | CH <sub>3</sub>         |
| 168 | 3-formyloxy-20-O-β-D-glucopyranosyl-20(S)-protopanaxatriol                                                                      | SS'                                    | H                                       | H              | O-Glc                                           | CH <sub>3</sub>         |
| 169 | Vina-ginsenosides R <sub>4</sub>                                                                                                | Glc <sup>6</sup> -Glc                  | H                                       | H              | O-Glc                                           | CH <sub>3</sub>         |
| 170 | Vina-ginsenosides R <sub>7</sub>                                                                                                | Glc <sup>2</sup> -Glc-Xyl              | H                                       | H              | O-Glc                                           | CH <sub>3</sub>         |
| 171 | Yesaninoside D                                                                                                                  | H                                      | Glc <sup>6</sup> -AC                    | H              | O-Glc                                           | CH <sub>3</sub>         |
| 172 | Yesaninoside E                                                                                                                  | Glc <sup>2</sup> -Rha                  | H                                       | H              | CH <sub>3</sub>                                 | O-Glc <sup>6</sup> -Xyl |
| 173 | 20(R)-ginsenoside Rh <sub>5</sub>                                                                                               | OH                                     | O-Glc                                   | H              | CH <sub>3</sub>                                 | O-CH <sub>3</sub>       |
| 174 | 6-O-[β-D-glucopyranosyl-(1 → 2)-β-D-glucopyranosyl]-20-O-[β-D-glucopyranosyl-(1 → 4)-β-D-glucopyranosyl]-20(S)-protopanaxatriol | H                                      | Glc <sup>2</sup> -Glc                   | H              | O-Glc <sup>4</sup> -Glc                         | CH <sub>3</sub>         |
| 175 | 20(S)-6-O-[β-D-xylopyranosyl-(1 → 2)-β-D-xylopyranosyl]dammar-24-ene-3β,6α,12β,20-tetrol                                        | Xyl-Xyl <sup>2</sup>                   | H                                       | H              | OH                                              | CH <sub>3</sub>         |
| 176 | Malonyl-ginsenoside Rg <sub>1</sub>                                                                                             | H                                      | Glc <sup>6</sup> -Mal                   | H              | O-Glc                                           | CH <sub>3</sub>         |
| 177 | Malonyl-ginsenoside Re                                                                                                          | H                                      | Glc <sup>2</sup> -Rha-Mal               | H              | O-Glc                                           | CH <sub>3</sub>         |
| 178 | Malonyl-floralginsenosides Re <sub>1</sub>                                                                                      | II                                     | (6-Mal)Glc <sup>2</sup> -Rha            | H              | O-Glc                                           | CH <sub>3</sub>         |
| 179 | Malonyl-floralginsenosides Re <sub>2</sub>                                                                                      | H                                      | Glc <sup>2</sup> -Rha                   | H              | O-(2-Mal)Glc                                    | CH <sub>3</sub>         |
| 180 | Malonyl-floralginsenosides Re <sub>3</sub>                                                                                      | H                                      | Glc <sup>2</sup> -Rha                   | H              | O-(4-Mal)Glc                                    | CH <sub>3</sub>         |
| 181 | 20(R)-ginsenoside Rh <sub>1</sub> 6'-acetate                                                                                    | H                                      | Glc <sup>6</sup> -Ac                    | H              | CH <sub>3</sub>                                 | OH                      |
| 182 | 20(S)-ginsenoside Rh <sub>1</sub> 6'-acetate                                                                                    | H                                      | Glc <sup>6</sup> -Ac                    | H              | OH                                              | CH <sub>3</sub>         |
| 183 | (20S)-20-O-[β-D-xylopyranosyl-(1 → 6)-β-D-glucopyranosyl-(1 → 6)-β-D-glucopyranosyl] dammar-24-ene-3β,6α,12β,20-tetrol          | H                                      | H                                       | H              | O-Xyl-Glc <sup>6</sup> -Glc <sup>6</sup>        | CH <sub>3</sub>         |
| 184 | (20S)-6-O-[(E)-but-2-enoyl-(1 → 6)-β-D-glucopyranosyl] dammar-24-ene-3β,6α,12β,20-tetrol                                        | H                                      | S3'                                     | H              | OH                                              | CH <sub>3</sub>         |
| 185 | Ginsenoside Ia                                                                                                                  | Glc                                    | H                                       | H              | O-Glc                                           | CH <sub>3</sub>         |
| 186 | Pseudo-ginsenoside RT <sub>8</sub>                                                                                              | Glc <sup>2</sup> -Glc                  | H                                       | H              | CH <sub>3</sub>                                 | CH <sub>3</sub>         |
| 187 | Quinquenoside Ja                                                                                                                | II                                     | Glc <sup>2</sup> -Glc                   | II             | O-Glc <sup>4</sup> -Glc                         | CH <sub>3</sub>         |



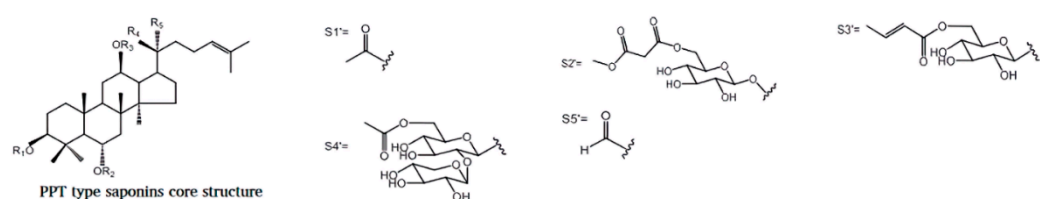

Figure S5. The structure of compounds in *Panax ginseng* C.A mey (Part.2)

Table S5 Chemical compositions in *Panax ginseng* C.A mey (Part.3)

| NO. | Compound                                                                                  | R <sub>1</sub>             | R <sub>2</sub>  | R <sub>3</sub> |
|-----|-------------------------------------------------------------------------------------------|----------------------------|-----------------|----------------|
| 188 | Talbalenoside IV                                                                          | Glc-UA <sup>2</sup> -Glc   | CH <sub>3</sub> | H              |
| 189 | Calenduloside E                                                                           | Glc-UA                     | CH <sub>3</sub> | H              |
| 190 | Oleanolic acid 3-O-[β-D-glucopyranosyl-(1 → 2)-β-D-glucuronopyranosyl-6'-O-n-butyl ester] | I2                         | CH <sub>3</sub> | H              |
| 191 | Calenduloside B                                                                           | Glc <sup>4</sup> -Gal      | CH <sub>3</sub> | Glc            |
| 192 | Pjs-1 (oleanolic acid 28-O-β-D-glucopyranoside)                                           | H                          | CH <sub>3</sub> | Glc            |
| 193 | Pseudo-ginsenoside-Rl <sub>3</sub>                                                        | I3                         | Xyl             | H              |
| 194 | Pseudoginsenoside Rp <sub>1</sub>                                                         | GlcUA <sup>2</sup> -Xyl    | CH <sub>3</sub> | H              |
| 195 | Polyacetyleneginsenoside Ro                                                               | I1                         | CH <sub>3</sub> | Glc            |
| 196 | 28-desglucosyl chikusetsusaponin IV                                                       | GlcUA <sup>4</sup> -Ara(p) | CH <sub>3</sub> | H              |
| 197 | Oleanolic acid                                                                            | H                          | CH <sub>3</sub> | H              |

  

| NO. | Compound                                                                                                   | R <sub>1</sub> = I4 |                       |                |                    | R <sub>2</sub>  | R <sub>3</sub> |
|-----|------------------------------------------------------------------------------------------------------------|---------------------|-----------------------|----------------|--------------------|-----------------|----------------|
|     |                                                                                                            | r <sub>1</sub>      | r <sub>2</sub>        | r <sub>3</sub> | r <sub>4</sub>     |                 |                |
| 198 | Bifinoside A                                                                                               | Ara(p)              | H                     | H              | COOCH <sub>3</sub> | CH <sub>3</sub> | H              |
| 199 | Bifinoside B                                                                                               | H                   | Xyl <sup>6</sup> -Glc | H              | COOCH <sub>3</sub> | CH <sub>3</sub> | H              |
| 200 | Bifinoside C                                                                                               | Xyl                 | Ara(p)                | H              | COOCH <sub>3</sub> | CH <sub>3</sub> | Glc            |
| 201 | Talbalenoside I                                                                                            | H                   | H                     | Ara(f)         | n-Bu               | CH <sub>3</sub> | Glc            |
| 202 | Chikusetsusaponin IV                                                                                       | H                   | H                     | Ara(f)         | COOH               | CH <sub>3</sub> | Glc            |
| 203 | Chikusetsusaponin IV methyl ester                                                                          | H                   | H                     | Ara(f)         | COOCH <sub>3</sub> | CH <sub>3</sub> | Glc            |
| 204 | Chikusetsusaponin IVα                                                                                      | H                   | H                     | H              | COOH               | CH <sub>3</sub> | Glc            |
| 205 | Chikusetsusaponin IVa methyl ester                                                                         | H                   | H                     | H              | COOCH <sub>3</sub> | CH <sub>3</sub> | Glc            |
| 206 | Chikusetsusaponin IVa butyl ester                                                                          | H                   | H                     | H              | n-Bu               | CH <sub>3</sub> | Glc            |
| 207 | Chikusetsusaponin V                                                                                        | H                   | H                     | Glc            | COOH               | CH <sub>3</sub> | Glc            |
| 208 | Chikusetsusaponin Ib                                                                                       | Ara(f)              | H                     | H              | COOH               | CH <sub>3</sub> | Glc            |
| 209 | Stipuleanoside R <sub>1</sub>                                                                              | H                   | Glc                   | Ara(f)         | COOH               | CH <sub>3</sub> | H              |
| 210 | Stipuleanoside R <sub>2</sub>                                                                              | H                   | Glc                   | Ara(f)         | COOH               | CH <sub>3</sub> | Glc            |
| 211 | Stipuleanoside R <sub>2</sub> methyl ester                                                                 | H                   | Glc                   | Ara(f)         | COOCH <sub>3</sub> | CH <sub>3</sub> | Glc            |
| 212 | Pseudoginsenoside RT <sub>1</sub>                                                                          | Xyl                 | H                     | H              | COOH               | CH <sub>3</sub> | Glc            |
| 213 | Pseudoginsenoside RT <sub>1</sub> methyl ester                                                             | Xyl                 | H                     | H              | COOCH <sub>3</sub> | CH <sub>3</sub> | Glc            |
| 214 | Pseudoginsenoside Rp <sub>1</sub> methyl ester                                                             | Xyl                 | H                     | H              | COOCH <sub>3</sub> | CH <sub>3</sub> | H              |
| 215 | Ginsenoside Ro                                                                                             | Glc                 | H                     | H              | COOH               | CH <sub>3</sub> | H              |
| 216 | Ginsenoside Ro methyl ester                                                                                | Glc                 | H                     | H              | COOCH <sub>3</sub> | CH <sub>3</sub> | Glc            |
| 217 | Spinasaponin A 28-O-glucoside                                                                              | H                   | Glc                   | H              | COOH               | CH <sub>3</sub> | H              |
| 218 | Araloside A methyl ester                                                                                   | H                   | H                     | Ara(f)         | COOCH <sub>3</sub> | CH <sub>3</sub> | Glc            |
| 219 | 3-O-β-D-glucopyranosyl (1 → 3)-β-D-glucuronopyranoside-28-O-β-D-glucopyranosyl oleanolic acid methyl ester | H                   | Glc                   | H              | COOCH <sub>3</sub> | CH <sub>3</sub> | Glc            |
| 220 | 3-O-β-D-xylopyranosyl (1 → 2)-β-D-glucopyranosyl-28-O-β-D-glucopyranosyl oleanolic acid                    | Xyl                 | H                     | H              | CH <sub>2</sub> OH | CH <sub>3</sub> | Glc            |

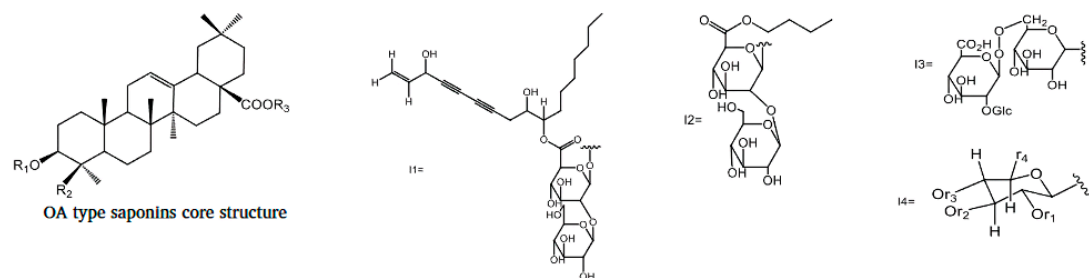

Figure S6. The structure of compounds in *Panax ginseng* C.A mey (Part.3)



Table S6 Chemical compositions in *Panax ginseng* C.A mey (Part.4)

| NO. | Compound                                                                                                                                                           | R <sub>1</sub> | R <sub>2</sub>                          | R <sub>3</sub>     | C <sub>20</sub> | C <sub>24</sub> |
|-----|--------------------------------------------------------------------------------------------------------------------------------------------------------------------|----------------|-----------------------------------------|--------------------|-----------------|-----------------|
| 221 | Gypenoside F <sub>11</sub>                                                                                                                                         | H              | O-Glc-Rha                               | CH <sub>3</sub>    | R               | S               |
| 222 | (20R,24R)-dammarane-20,24-epoxy-3 $\beta$ ,6 $\alpha$ ,12 $\beta$ ,25-tetraol                                                                                      | H              | H                                       | CH <sub>3</sub>    | R               | R               |
| 223 | Vina-ginsenosides R <sub>14</sub>                                                                                                                                  | H              | O-Glc <sup>2</sup> -Xyl                 | CH <sub>3</sub>    | S               | R               |
| 224 | 24(R)-Ocotillol                                                                                                                                                    | H              | OH                                      | CH <sub>3</sub>    | S               | R               |
| 225 | Pseudoginsenoside F <sub>11</sub>                                                                                                                                  | H              | O-Glc <sup>2</sup> -Rha                 | CH <sub>3</sub>    | S               | R               |
| 226 | 24(R)-majoroside R <sub>1</sub>                                                                                                                                    | H              | OH                                      | CH <sub>3</sub>    | S               | R               |
| 227 | (20S,24R,25R)-6-O-[ $\beta$ -D-glucopyranosyl-(1 $\rightarrow$ 2)- $\beta$ -D-glucopyranosyl]-dammar-20,24-epoxy-3 $\beta$ ,6 $\alpha$ ,12 $\beta$ ,25,26-pentaol  | H              | O-Glc <sup>2</sup> -Glc                 | CH <sub>2</sub> OH | S               | R               |
| 228 | (20S,24R)-dammarane-20,24-epoxy-3 $\beta$ ,6 $\alpha$ ,12 $\beta$ ,25-tetraol                                                                                      | H              | OH                                      | CH <sub>3</sub>    | S               | R               |
| 229 | Pseudoginsenoside RT <sub>5</sub>                                                                                                                                  | H              | O-Glc                                   | CH <sub>3</sub>    | S               | R               |
| 230 | Pseudoginsenoside RT <sub>2</sub>                                                                                                                                  | H              | O-Glc <sup>2</sup> -Xyl                 | CH <sub>3</sub>    | S               | R               |
| 231 | (20S,24R)-Pseudoginsenoside F <sub>11</sub>                                                                                                                        | H              | O-Glc <sup>2</sup> -Rha                 | CH <sub>3</sub>    | S               | R               |
| 232 | Vina-ginsenosides R <sub>1</sub>                                                                                                                                   | H              | AC-Glc <sup>2</sup> -Rha                | CH <sub>3</sub>    | S               | S               |
| 233 | Vina-ginsenosides R <sub>2</sub>                                                                                                                                   | H              | AC-Glc <sup>2</sup> -Xyl                | CH <sub>3</sub>    | S               | S               |
| 234 | Vina-ginsenosides R <sub>5</sub>                                                                                                                                   | H              | Glc <sup>2</sup> -Xyl <sup>4</sup> -Glc | CH <sub>3</sub>    | S               | S               |
| 235 | Vina-ginsenosides R <sub>6</sub>                                                                                                                                   | H              | Glc <sup>6</sup> -Glc <sup>2</sup> -Xyl | CH <sub>3</sub>    | S               | S               |
| 236 | Vina-ginsenosides R <sub>13</sub>                                                                                                                                  | H              | Glc <sup>2</sup> -Xyl                   | CH <sub>3</sub>    | S               | S               |
| 237 | (20S,24S,25R*)-6-O-[ $\beta$ -D-glucopyranosyl-(1 $\rightarrow$ 2)- $\beta$ -D-glucopyranosyl]-dammar-20,24-epoxy-3 $\beta$ ,6 $\alpha$ ,12 $\beta$ ,25,26-pentaol | H              | Glc <sup>2</sup> -Glc                   | CH <sub>2</sub> OH | S               | S               |
| 238 | Pseudo-ginsenoside RT <sub>4</sub>                                                                                                                                 | H              | Glc                                     | CH <sub>3</sub>    | S               | S               |
| 239 | 24(S)-majoroside R <sub>1</sub>                                                                                                                                    | H              | Glc <sup>2</sup> -Glc                   | CH <sub>3</sub>    | S               | S               |
| 240 | 24(S)-6-O-[ $\beta$ -D-glucopyranosyl-(1 $\rightarrow$ 2)- $\beta$ -D-glucopyranosyl]-dammar-20,25-epoxy-3 $\beta$ ,6 $\alpha$ ,12 $\beta$ ,24 $\alpha$ -tetraol   | H              | Glc <sup>2</sup> -Glc                   | CH <sub>3</sub>    | S               | S               |
| 241 | 24(S)-Majoroside R <sub>2</sub>                                                                                                                                    | H              | Glc <sup>2</sup> -Xyl                   | CH <sub>3</sub>    | S               | S               |
| 242 | (20S,24S)-dammarane-20,24-epoxy-3 $\beta$ ,6 $\alpha$ ,12 $\beta$ ,25-tetraol                                                                                      | H              | H                                       | CH <sub>3</sub>    | S               | S               |
| 243 | Yesanchinoside A (24S)                                                                                                                                             | H              | AC- <sup>6</sup> Glc <sup>2</sup> -Glc  | CH <sub>3</sub>    | S               | S               |
| 244 | Yesanchinoside B (24S)                                                                                                                                             | H              | Glc- <sup>6</sup> Glc <sup>2</sup> -Glc | CH <sub>3</sub>    | S               | S               |
| 245 | Yesanchinoside C (24S)                                                                                                                                             | H              | Glc <sup>2</sup> -Glc <sup>2</sup> -Xyl | CH <sub>3</sub>    | S               | S               |

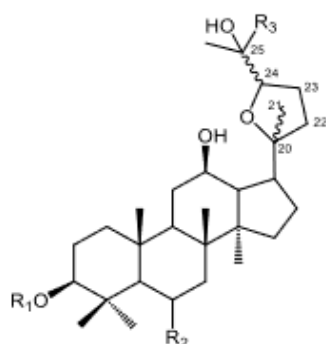

OC type saponins core structure

Figure S7 The structure of compounds in *Panax ginseng* C.A mey(Part.4)Table S7 Chemical compositions in *Panax ginseng* C.A mey(Part.5)

| NO. | Type | Compound                                                                                                                     | R <sub>1</sub>        | R <sub>2</sub> | R <sub>3</sub>             | R <sub>4</sub> | Chiral Carbon |
|-----|------|------------------------------------------------------------------------------------------------------------------------------|-----------------------|----------------|----------------------------|----------------|---------------|
| 246 | V1   | 25-hydroxy-23-ene-20(S)-protopanaxadiol                                                                                      | H                     | OH             | OH                         | —              | C24:S         |
| 247 | V1   | Ginsenoside-M6a                                                                                                              | Glc <sup>2</sup> -Glc | OH             | O-Glc                      | —              | C25:S         |
| 248 | V1   | Floranotoginsenoside A                                                                                                       | Glc <sup>2</sup> -Glc | OH             | O-Glc <sup>6</sup> -Ara(f) | —              | C25:S         |
| 249 | V1   | Gypenoside XLIX                                                                                                              | Glc <sup>2</sup> -Glc | OH             | O-Glc <sup>6</sup> -Xyl    | —              | C25:S         |
| 250 | V1   | Notoginsenoside L <sub>16</sub>                                                                                              | Glc                   | OH             | O-Glc <sup>6</sup> -Ara(f) | —              | C25:S         |
| 251 | V1   | Vina-ginsenosides R <sub>8</sub>                                                                                             | Glc <sup>2</sup> -Glc | OH             | O-Glc                      | —              | C25:R         |
| 252 | V1   | Dammar-23 (24)-ene-3 $\beta$ ,12 $\beta$ , 20(S), 25-tetraol-20-O- $\beta$ -D-glucopyranosyl-3-O- $\beta$ -D-glucopyranoside | Glc                   | OH             | Glc                        | —              | C25:R         |
| 253 | V1   | Majoroside F <sub>4</sub>                                                                                                    | Glc                   | OH             | O-Glc                      | —              | C25:R         |
| 254 | V1   | dammar-23 (24)-ene-3 $\beta$ , 12 $\beta$ , 20(S), 25-tetraol-20-O- $\beta$ -D-glucopyranoside                               | H                     | OH             | O-Glc                      | —              | C25:R         |
| 255 | V2   | Notoginsenoside Fh <sub>6</sub>                                                                                              | Glc <sup>2</sup> -Gen | OH             | O-Glc                      | —              | —             |
| 256 | V3   | Notoginsenoside SF <sub>12</sub>                                                                                             | Glc                   | OH             | OH                         | —              | —             |
| 257 | V3   | dammar-3 $\beta$ ,12 $\beta$ ,20(S),24( $\zeta$ ),25-pentaol-20-O- $\beta$ -D-glucopyranoside                                | H                     | OH             | O-Glc                      | —              | —             |
| 258 | V3   | Chikusetsusaponin FM <sub>1</sub>                                                                                            | Glc <sup>2</sup> -Glc | OH             | O-Glc <sup>2</sup> -Xyl    | —              | —             |
| 259 | V4   | Notoginsenoside R <sub>7</sub>                                                                                               | Glc                   | OH             | —                          | —              | —             |



Table S7(continued)

| NO. | Type | Compound                                                                                 | R <sub>1</sub>                          | R <sub>2</sub> | R <sub>3</sub>             | R <sub>4</sub>  | Chiral Carbon |
|-----|------|------------------------------------------------------------------------------------------|-----------------------------------------|----------------|----------------------------|-----------------|---------------|
| 260 | V4   | 3 $\beta$ -acetoxy-12 $\beta$ -hydroxy-20 (R), 25-epoxy dammarane                        | AC                                      | OH             | —                          | —               | —             |
| 261 | V5   | Notoginsenoside SFT <sub>1</sub>                                                         | Glc                                     | OH             | OH                         | —               | C24:R         |
| 262 | V5   | Notoginsenoside Fh <sub>3</sub>                                                          | Glc <sup>2</sup> -Glc <sup>2</sup> -Xyl | OH             | O-Glc <sup>2</sup> -Xyl    | —               | C24:R         |
| 263 | V5   | Notoginsenoside Fh <sub>4</sub>                                                          | Glc <sup>2</sup> -Glc <sup>2</sup> -Xyl | OH             | O-Glc <sup>6</sup> -Glc    | —               | C24:R         |
| 264 | V5   | Floranotoginsenoside D                                                                   | Glc <sup>2</sup> -Glc                   | OH             | O-Glc <sup>6</sup> -Ara(f) | —               | C24:R         |
| 265 | V5   | Notoginsenosides LK <sub>6</sub>                                                         | Glc <sup>2</sup> -Glc                   | OH             | O-Xyl                      | —               | C24:R         |
| 266 | V5   | Notoginsenosides LK <sub>7</sub>                                                         | Glc <sup>2</sup> -Glc                   | OH             | O-Glc <sup>6</sup> -Ara(f) | —               | C24:R         |
| 267 | V5   | Notoginsenosides LK <sub>8</sub>                                                         | Glc <sup>2</sup> -Glc <sup>2</sup> -Xyl | OH             | OH                         | —               | C24:R         |
| 268 | V5   | Vinaginsenosides R <sub>9</sub>                                                          | Glc <sup>2</sup> -Glc                   | OH             | O-Glc                      | —               | C24:S         |
| 269 | V5   | Bipinnatifidusoside F <sub>1</sub>                                                       | Glc <sup>2</sup> -Glc                   | OH             | O-Glc                      | —               | C24:R         |
| 270 | V5   | Majoroside F <sub>1</sub>                                                                | Glc <sup>2</sup> -Glc                   | OH             | O-Glc                      | —               | C24:R         |
| 271 | V6   | Notoginsenoside Ft <sub>2</sub>                                                          | Glc <sup>2</sup> -Glc <sup>2</sup> -Xyl | OH             | OH                         | —               | —             |
| 272 | V7   | Ginsenoside II                                                                           | Glc <sup>2</sup> -Glc                   | OH             | O-Glc                      | OH              | —             |
| 273 | V7   | Floranotoginsenoside B                                                                   | Glc <sup>2</sup> -Glc                   | OH             | O-Glc <sup>2</sup> -Xyl    | OH              | —             |
| 274 | V7   | Floranotoginsenoside C                                                                   | Glc <sup>2</sup> -Glc                   | OH             | O-Glc <sup>6</sup> -Ara(f) | OH              | —             |
| 275 | V7   | Floralquinquenoside D                                                                    | Glc                                     | OH             | O-Glc                      | OH              | —             |
| 276 | V8   | Ginsenoside III                                                                          | Glc <sup>2</sup> -Glc                   | OH             | O-Glc                      | —               | —             |
| 277 | V8   | Notoginsenoside L <sub>17</sub>                                                          | Glc                                     | OH             | O-Glc <sup>6</sup> -Xyl    | —               | —             |
| 278 | V8   | Notoginsenoside L <sub>18</sub>                                                          | Glc                                     | OH             | O-Glc <sup>6</sup> -Ara(f) | —               | —             |
| 279 | V8   | Notoginsenoside L <sub>19</sub>                                                          | Glc                                     | OH             | O-Glc <sup>6</sup> -Ara(f) | —               | —             |
| 280 | V9   | Ginsenoside Rg <sub>12</sub>                                                             | Glc-Glc <sup>2</sup>                    | OH             | OH                         | OH              | —             |
| 281 | V10  | Ginsenoside L <sub>1</sub>                                                               | Glc                                     | OH             | OH                         | —               | —             |
| 282 | V11  | Ginsenoside L <sub>2</sub>                                                               | Glc <sup>2</sup> -Glc                   | OH             | OH                         | —               | —             |
| 283 | V12  | Notoginsenosides Ng <sub>2</sub>                                                         | Glc <sup>2</sup> -Glc                   | OH             | O-Glc <sup>6</sup> -Ara(f) | —               | —             |
| 284 | V12  | Notoginsenosides LK <sub>1</sub>                                                         | Glc <sup>2</sup> -Glc                   | OH             | O-Glc <sup>6</sup> -Xyl    | —               | —             |
| 285 | V12  | Notoginsenosides LK <sub>4</sub>                                                         | Glc <sup>2</sup> -Glc <sup>2</sup> -Xyl | OH             | O-Glc <sup>6</sup> -Xyl    | —               | —             |
| 286 | V12  | Notoginsenosides LK <sub>5</sub>                                                         | Glc <sup>2</sup> -Glc <sup>2</sup> -Xyl | OH             | O-Glc <sup>6</sup> -Ara(p) | —               | —             |
| 287 | V12  | Vinaginsenoside R <sub>20</sub>                                                          | Glc <sup>2</sup> -Glc                   | OH             | O-Glc                      | —               | —             |
| 288 | V13  | Notoginsenosides LK <sub>2</sub>                                                         | Glc <sup>2</sup> -Glc <sup>2</sup> -Xyl | OH             | O-Glc-Ara(f)               | —               | —             |
| 289 | V13  | Notoginsenosides LK <sub>3</sub>                                                         | Glc <sup>2</sup> -Glc <sup>2</sup> -Xyl | OH             | O-Glc                      | —               | —             |
| 290 | V13  | Notoginsenosides LK <sub>15</sub>                                                        | Glc                                     | OH             | O-Glc <sup>6</sup> -Xyl    | —               | —             |
| 291 | V14  | Notoginsenoside L <sub>1</sub>                                                           | H                                       | OH             | —                          | —               | —             |
| 292 | V15  | Notoginsenoside L <sub>2</sub>                                                           | Glc <sup>2</sup> -Glc                   | OH             | OH                         | —               | —             |
| 293 | V16  | Notoginsenoside L <sub>3</sub>                                                           | Glc                                     | OH             | —                          | —               | —             |
| 294 | V17  | Sanchirrhinoside D                                                                       | Glc <sup>2</sup> -Glc                   | OH             | OH                         | —               | —             |
| 295 | V18  | Koryoginsenoside R <sub>2</sub>                                                          | Glc <sup>2</sup> -Glc                   | OH             | O-Glc <sup>6</sup> -Glc    | —               | —             |
| 296 | V19  | 3 $\beta$ ,6 $\beta$ ,12 $\beta$ ,20(S)-trihydroxy dammar 24-methyl 1-23-ene-24-carbonyl | H                                       | OH             | OH                         | —               | —             |
| 297 | V20  | 3 $\beta$ ,12 $\beta$ ,20(S),25-tetrahydroxy dammar 23-ene                               | H                                       | OH             | OH                         | —               | —             |
| 298 | V20  | Quinquenoside L <sub>3</sub>                                                             | Glc                                     | OH             | O-Glc <sup>6</sup> -Xyl    | —               | —             |
| 299 | V21  | 27-demethyl-(E,E)-20 (22),23-dien-3 $\beta$ ,12 $\beta$ -dihydroxydammar-25-one          | H                                       | OH             | —                          | —               | —             |
| 300 | V22  | 20(S)-25-ethoxyl-dammarane-3 $\beta$ ,12 $\beta$ ,20-triol                               | H                                       | OH             | OH                         | CH <sub>3</sub> | —             |
| 301 | V22  | 20(R)-25-ethoxyl-dammarane-3 $\beta$ ,12 $\beta$ ,20-triol                               | H                                       | OH             | CH <sub>3</sub>            | OH              | —             |
| 302 | V23  | Quinquenoside L <sub>1</sub>                                                             | Glc <sup>2</sup> -Glc                   | OH             | O-Glc                      | —               | —             |
| 303 | V24  | Isoginsenoside Rh <sub>3</sub>                                                           | Glc                                     | OH             | —                          | —               | —             |
| 304 | V25  | Floralginsenoside E                                                                      | Glc <sup>2</sup> -Glc                   | OH             | OH                         | OH              | —             |
| 305 | V25  | Floralginsenoside F                                                                      | Glc                                     | OH             | O-Glc                      | OH              | —             |
| 306 | V26  | Floralginsenoside Kb                                                                     | Glc <sup>2</sup> -Glc                   | OH             | O-Glc                      | H               | —             |
| 307 | V26  | Floralginsenoside Kc                                                                     | Glc <sup>2</sup> -Glc                   | OH             | O-Glc                      | OH              | —             |
| 308 | V27  | Bipinnatifidusoside F <sub>2</sub>                                                       | Glc <sup>2</sup> -Glc                   | OH             | O-Glc                      | —               | —             |
| 309 | V28  | Ginsenoside Rz <sub>1</sub>                                                              | Glc <sup>2</sup> -Glc                   | OH             | —                          | —               | —             |
| 310 | V29  | Vinaginsenoside R <sub>24</sub>                                                          | Glc <sup>2</sup> -Glc                   | OH             | Glc                        | CH <sub>3</sub> | —             |
| 311 | V30  | Ginsenoside RT <sub>5</sub>                                                              | Glc                                     | OH             | CH <sub>3</sub>            | —               | —             |

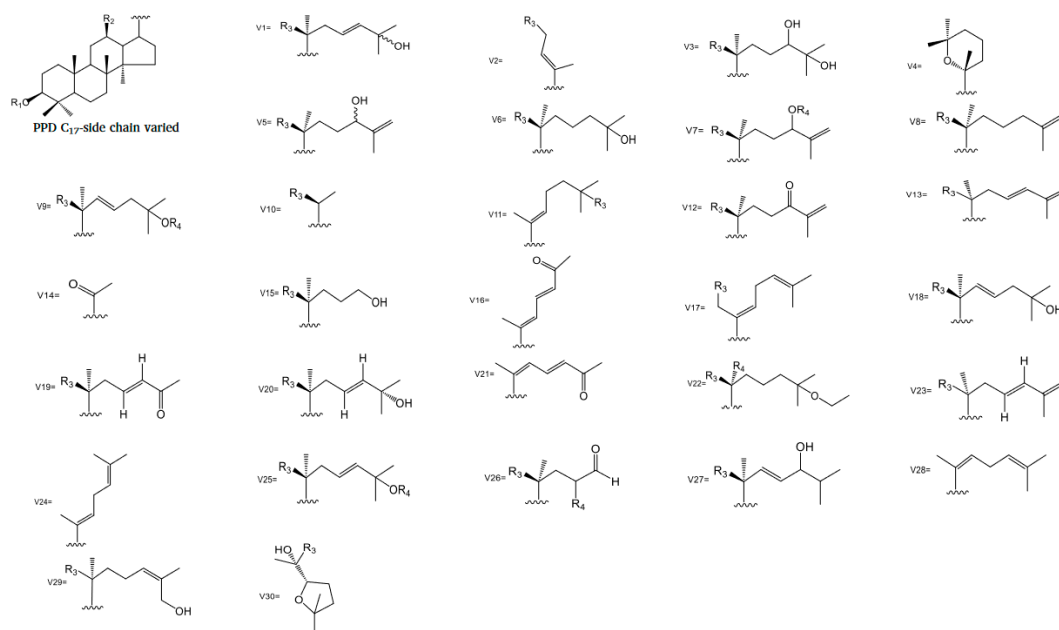Figure S8. The structure of compounds in *Panax ginseng* C.A. Mey (Part.5)



Table S8 Chemical compositions in *Panax ginseng* C.A mey(Part.6)

| NO. | Type | R <sub>1</sub>                            | R <sub>2</sub>          | R <sub>3</sub> | R <sub>4</sub>           | R <sub>5</sub>             | R <sub>6</sub> | Chiral Carbon |
|-----|------|-------------------------------------------|-------------------------|----------------|--------------------------|----------------------------|----------------|---------------|
| 312 | W1   | OH                                        | OH                      | H              | —                        | —                          | —              | —             |
| 313 | W1   | OH                                        | H                       | H              | —                        | —                          | —              | —             |
| 314 | W1   | OH                                        | OH                      | H              | —                        | —                          | —              | —             |
| 315 | W1   | O-Glc                                     | H                       | H              | —                        | —                          | —              | —             |
| 316 | W1   | OH                                        | O-Glc                   | H              | —                        | —                          | —              | —             |
| 317 | W2   | OH                                        | O-Glc                   | H              | H                        | —                          | —              | —             |
| 318 | W2   | OH                                        | O-Glc <sup>2</sup> -Xyl | H              | H                        | —                          | —              | —             |
| 319 | W3   | OH                                        | O-Glc                   | H              | H                        | —                          | —              | —             |
| 320 | W3   | OH                                        | O-Glc <sup>2</sup> -Rha | H              | Glc                      | —                          | —              | —             |
| 321 | W3   | OH                                        | O-Glc <sup>2</sup> -Rha | H              | H                        | —                          | —              | —             |
| 322 | W4   | OH                                        | O-Glc                   | H              | Glc                      | —                          | —              | —             |
| 323 | W4   | OH                                        | O-Glc                   | H              | H                        | —                          | —              | —             |
| 324 | W4   | OH                                        | O-Glc                   | H              | H                        | —                          | —              | —             |
| 325 | W4   | OH                                        | O-Glc <sup>2</sup> -Glc | H              | H                        | —                          | —              | —             |
| 326 | W4   | O-Glc <sup>2</sup> -Glc                   | H                       | H              | Glc                      | —                          | —              | —             |
| 327 | W4   | OH                                        | O-Glc                   | H              | Glc                      | —                          | —              | —             |
| 328 | W5   | OH                                        | OH                      | H              | OH                       | CH <sub>3</sub>            | —              | C25:S         |
| 329 | W5   | OH                                        | O-Glc <sup>2</sup> -Rha | H              | OH                       | CH <sub>3</sub>            | —              | C25:S         |
| 330 | W5   | OH                                        | OH                      | H              | CH <sub>3</sub>          | OH                         | —              | C25:S         |
| 331 | W5   | OH                                        | O-Glc <sup>2</sup> -Rha | H              | CH <sub>3</sub>          | OH                         | —              | C25:S         |
| 332 | W5   | OH                                        | H                       | H              | OH                       | CH <sub>3</sub>            | —              | C25:R         |
| 333 | W5   | OH                                        | H                       | H              | CH <sub>3</sub>          | OH                         | —              | C25:R         |
| 334 | W5   | OH                                        | OH                      | H              | OH                       | CH <sub>3</sub>            | —              | C25:R         |
| 335 | W5   | OH                                        | OH                      | H              | CH <sub>3</sub>          | OH                         | —              | C25:R         |
| 336 | W5   | OH                                        | O-Glc <sup>2</sup> -Rha | H              | CH <sub>3</sub>          | OH                         | —              | C25:R         |
| 337 | W5   | OH                                        | O-Glc <sup>2</sup> -Rha | H              | OH                       | CH <sub>3</sub>            | —              | C25:R         |
| 338 | W6   | OH                                        | O-Glc <sup>2</sup> -Xyl | H              | OH                       | O-Glc                      | —              | —             |
| 339 | W6   | O-Glc <sup>2</sup> -Glc                   | OH                      | H              | OH                       | O-Glc                      | —              | —             |
| 340 | W6   | OH                                        | OH                      | H              | OH                       | O-Glc <sup>2</sup> -Xyl    | —              | —             |
| 341 | W6   | O-Glc <sup>2</sup> -Glc <sup>2</sup> -Xyl | H                       | H              | OH                       | O-Glc <sup>6</sup> -Glc    | —              | —             |
| 342 | W6   | OH                                        | H                       | H              | OH                       | OH                         | —              | —             |
| 343 | W6   | OH                                        | Glc                     | H              | OH                       | O-Glc                      | —              | —             |
| 344 | W6   | OH                                        | O-Glc <sup>2</sup> -Rha | H              | OH                       | O-Glc                      | —              | —             |
| 345 | W6   | OH                                        | O-Glc                   | H              | OH                       | OH                         | —              | —             |
| 346 | W6   | OH                                        | OH                      | H              | CH <sub>3</sub>          | O-Glc                      | —              | —             |
| 347 | W6   | OH                                        | OH                      | H              | OH                       | O-Glc                      | —              | —             |
| 348 | W6   | OH                                        | OH                      | H              | OH                       | O-Glc                      | —              | —             |
| 349 | W6   | O-Glc <sup>2</sup> -Glc                   | OH                      | H              | OCH <sub>3</sub>         | O-Glc <sup>6</sup> -Xyl    | —              | —             |
| 350 | W6   | OH                                        | O-Glc                   | H              | OOH                      | OH                         | —              | —             |
| 351 | W6   | O-Glc <sup>2</sup> -Glc <sup>2</sup> -Xyl | OH                      | H              | OOH                      | O-Glc <sup>6</sup> -Glc    | —              | —             |
| 352 | W6   | = O                                       | OH                      | H              | OOH                      | OH                         | —              | —             |
| 353 | W6   | H                                         | OH                      | = O            | OOH                      | OH                         | —              | —             |
| 354 | W6   | = O                                       | H                       | H              | OOH                      | OH                         | —              | —             |
| 355 | W6   | OH                                        | O-Glc                   | H              | OOH                      | O-Glc                      | —              | —             |
| 356 | W6   | OH                                        | OH                      | H              | OOH                      | O-Glc <sup>6</sup> -Ara(f) | —              | —             |
| 357 | W6   | OH                                        | O-Glc                   | H              | OOH                      | OH                         | —              | —             |
| 358 | W6   | OH                                        | O-Glc <sup>2</sup> -Rha | H              | OOH                      | OH                         | —              | —             |
| 359 | W6   | OH                                        | OH                      | H              | OOH                      | O-Glc                      | —              | —             |
| 360 | W6   | OH                                        | O-Glc                   | H              | OOH                      | OH                         | —              | —             |
| 361 | W7   | O-Glc <sup>2</sup> -Glc <sup>2</sup> -Xyl | H                       | H              | Glc <sup>6</sup> -Glc    | —                          | —              | —             |
| 362 | W7   | OH                                        | O-Glc <sup>2</sup> -Rha | H              | Glc                      | —                          | —              | —             |
| 363 | W7   | OH                                        | Glc                     | H              | Glc                      | —                          | —              | —             |
| 364 | W7   | OH                                        | OH                      | H              | Glc                      | —                          | —              | —             |
| 365 | W8   | O-Glc <sup>2</sup> -Glc                   | OH                      | H              | Glc <sup>6</sup> -Glc    | OH                         | —              | C24:R         |
| 366 | W8   | OH                                        | O-Glc                   | H              | H                        | OH                         | —              | C24:R         |
| 367 | W12  | OH                                        | O-Glc <sup>2</sup> -Glc | H              | H                        | —                          | —              | C24:S         |
| 368 | W8   | OH                                        | OH                      | H              | Glc <sup>6</sup> -Ara(p) | OH                         | —              | C24:R         |
| 369 | W8   | OH                                        | O-Glc                   | H              | Glc                      | OH                         | —              | C24:R         |
| 370 | W8   | O-AC <sup>6</sup> Glc <sup>2</sup> -Glc   | H                       | H              | Glc                      | OH                         | —              | C24:R         |
| 371 | W8   | O-Glc <sup>2</sup> -Glc                   | H                       | H              | Glc <sup>6</sup> -Ara(p) | OH                         | —              | C24:R         |
| 372 | W8   | O-Glc <sup>2</sup> -Glc                   | H                       | H              | Glc <sup>6</sup> -Ara(p) | OH                         | —              | C24:R         |
| 373 | W8   | OH                                        | O-Glc <sup>2</sup> -Rha | H              | Glc                      | OH                         | —              | C24:R         |
| 374 | W8   | OH                                        | OH                      | H              | Glc                      | OH                         | —              | C24:R         |
| 375 | W8   | OH                                        | O-Glc <sup>2</sup> -Rha | H              | H                        | OH                         | —              | C24:R         |
| 376 | W8   | OH                                        | OH                      | H              | Glc                      | OH                         | —              | C24:S         |
| 377 | W9   | OH                                        | O-Glc                   | H              | —                        | —                          | —              | —             |
| 378 | W10  | OH                                        | O-Glc                   | H              | H                        | —                          | —              | —             |
| 379 | W10  | OH                                        | OH                      | H              | H                        | —                          | —              | —             |
| 380 | W11  | OH                                        | O-Glc                   | H              | H                        | —                          | —              | —             |
| 381 | W11  | OH                                        | O-Glc                   | H              | CH <sub>3</sub>          | —                          | —              | —             |
| 382 | W11  | O-Glc <sup>2</sup> -Rha                   | OH                      | H              | H                        | —                          | —              | —             |
| 383 | W12  | OH                                        | O-Glc <sup>3</sup> -Xyl | H              | —                        | —                          | —              | —             |
| 384 | W12  | OH                                        | O-Glc <sup>2</sup> -Rha | H              | —                        | —                          | —              | —             |
| 385 | W12  | OH                                        | OH                      | H              | —                        | —                          | —              | —             |
| 386 | W12  | O-Glc <sup>2</sup> -Glc <sup>2</sup> -Xyl | H                       | H              | —                        | —                          | —              | —             |
| 387 | W13  | OH                                        | O-Glc                   | H              | H                        | —                          | —              | —             |
| 388 | W13  | O-Glc <sup>2</sup> -Glc                   | H                       | H              | OCH <sub>3</sub>         | —                          | —              | —             |
| 389 | W14  | O-Glc <sup>2</sup> -Glc                   | H                       | H              | OCH <sub>3</sub>         | —                          | —              | —             |
| 390 | W15  | OH                                        | O-Glc                   | H              | —                        | —                          | —              | —             |
| 391 | W15  | OH                                        | OH                      | H              | —                        | —                          | —              | —             |
| 392 | W16  | OH                                        | Glc <sup>2</sup> -Rha   | H              | —                        | —                          | —              | —             |
| 393 | W16  | O-Glc <sup>2</sup> -Glc <sup>2</sup> -Xyl | H                       | H              | —                        | —                          | —              | —             |



Table S8(continued)

| NO. | Type | R <sub>1</sub>                           | R <sub>2</sub>          | R <sub>3</sub> | R <sub>4</sub>                    | R <sub>5</sub>   | R <sub>6</sub>  | Chiral Carbon |
|-----|------|------------------------------------------|-------------------------|----------------|-----------------------------------|------------------|-----------------|---------------|
| 394 | W16  | OH                                       | OH                      | H              | —                                 | —                | —               | —             |
| 395 | W16  | O-Glc <sup>2</sup> -Glc <sup>6</sup> -AC | H                       | H              | —                                 | —                | —               | —             |
| 396 | W16  | OH                                       | O-Glc <sup>2</sup> -Rha | H              | —                                 | —                | —               | —             |
| 397 | W17  | OH                                       | O-Glc                   | H              | —                                 | —                | —               | —             |
| 398 | W18  | OH                                       | O-Glc                   | H              | —                                 | —                | —               | —             |
| 399 | W19  | OH                                       | O-Glc                   | H              | —                                 | —                | —               | —             |
| 400 | W19  | O-Glc                                    | OH                      | H              | —                                 | —                | —               | —             |
| 401 | W20  | OH                                       | O-Glc <sup>2</sup> -Glc | H              | —                                 | —                | —               | —             |
| 402 | W21  | O-Glc <sup>2</sup> -Xyl                  | OH                      | H              | —                                 | —                | —               | —             |
| 403 | W21  | O-Glc                                    | OH                      | H              | —                                 | —                | —               | —             |
| 404 | W21  | OH                                       | OH                      | H              | —                                 | —                | —               | —             |
| 405 | W21  | OH                                       | O-Glc <sup>2</sup> -Rha | H              | —                                 | —                | —               | —             |
| 406 | W21  | OH                                       | O-Glc                   | Glc            | —                                 | —                | —               | —             |
| 407 | W22  | OH                                       | O-Glc                   | H              | —                                 | —                | —               | —             |
| 408 | W23  | OH                                       | O-Glc                   | H              | OH                                | —                | —               | C24:R         |
| 409 | W23  | OH                                       | O-Glc <sup>2</sup> -Glc | H              | OH                                | —                | —               | C24:R         |
| 410 | W23  | OH                                       | O-Glc <sup>2</sup> -Rha | H              | O-Glc                             | —                | —               | C24:R         |
| 411 | W23  | OH                                       | O-Glc <sup>2</sup> -Rha | H              | O-Glc                             | —                | —               | C24:R         |
| 412 | W23  | OH                                       | OH                      | H              | O-Glc                             | —                | —               | C24:S         |
| 413 | W23  | OH                                       | OH                      | H              | O-Glc                             | —                | —               | C24:S         |
| 414 | W23  | OH                                       | Glc                     | H              | OH                                | —                | —               | C24:R         |
| 415 | W24  | OH                                       | OH                      | H              | O-Glc                             | CH <sub>3</sub>  | —               | —             |
| 416 | W25  | OH                                       | O-Glc                   | H              | O-Glc <sup>6</sup> -Ara(f)        | CH <sub>3</sub>  | —               | —             |
| 417 | W26  | O-Glc <sup>2</sup> -Glc                  | OH                      | H              | —                                 | —                | —               | —             |
| 418 | W27  | OH                                       | OH                      | H              | O-CH <sub>2</sub> CH <sub>3</sub> | —                | —               | —             |
| 419 | W27  | OH                                       | OH                      | H              | OH                                | —                | —               | —             |
| 420 | W27  | O-Glc                                    | H                       | H              | OH                                | —                | —               | —             |
| 421 | W27  | OH                                       | H                       | H              | OH                                | —                | —               | —             |
| 422 | W27  | O-AC                                     | OH                      | H              | OH                                | —                | —               | —             |
| 423 | W27  | OH                                       | OH                      | AC             | OH                                | —                | —               | —             |
| 424 | W28  | OH                                       | OH                      | H              | O-Glc                             | —                | —               | —             |
| 425 | W29  | OH                                       | OH                      | H              | —                                 | —                | —               | —             |
| 426 | W30  | OH                                       | O-Glc                   | H              | CH <sub>3</sub>                   | —                | —               | —             |
| 427 | W30  | O-Glc                                    | H                       | H              | CH <sub>3</sub>                   | —                | —               | —             |
| 428 | W30  | O-Glc <sup>2</sup> -Glc                  | OH                      | H              | CH <sub>3</sub>                   | —                | —               | —             |
| 429 | W30  | OH                                       | O-Glc                   | H              | OH                                | —                | —               | —             |
| 430 | W30  | OH                                       | O-Glc                   | H              | OOH                               | —                | —               | —             |
| 431 | W30  | OH                                       | O-Glc <sup>2</sup> -Rha | H              | OOH                               | —                | —               | —             |
| 432 | W31  | OH                                       | O-Glc                   | H              | CH <sub>3</sub>                   | CH <sub>3</sub>  | —               | C24:S         |
| 433 | W31  | OH                                       | O-Glc <sup>2</sup> -Rha | H              | —                                 | O-Glc            | —               | C24:R         |
| 434 | W32  | OH                                       | O-Glc                   | H              | OH                                | —                | —               | C22:S         |
| 435 | W33  | OH                                       | O-Glc                   | H              | OH                                | —                | —               | —             |
| 436 | W34  | OH                                       | O-Glc                   | H              | —                                 | —                | —               | —             |
| 437 | W34  | OH                                       | O-Glc <sup>2</sup> -Xyl | H              | —                                 | —                | —               | —             |
| 438 | W35  | OH                                       | OH                      | H              | CH <sub>3</sub>                   | OH               | —               | —             |
| 439 | W35  | OH                                       | O-Glc                   | H              | OH                                | CH <sub>3</sub>  | —               | —             |
| 440 | W35  | OH                                       | O-Glc <sup>2</sup> -Xyl | H              | OH                                | CH <sub>3</sub>  | —               | —             |
| 441 | W35  | OH                                       | O-Glc <sup>2</sup> -Glc | H              | OH                                | CH <sub>3</sub>  | —               | —             |
| 442 | W35  | OH                                       | OH                      | H              | O-Glc                             | CH <sub>3</sub>  | —               | —             |
| 443 | W36  | OH                                       | OH                      | H              | —                                 | —                | —               | C24:S         |
| 444 | W36  | OH                                       | OH                      | H              | —                                 | —                | —               | C24:R         |
| 445 | W37  | OH                                       | OCOCH <sub>3</sub>      | H              | —                                 | —                | —               | —             |
| 446 | W38  | OH                                       | OH                      | H              | OH                                | CH <sub>3</sub>  | —               | —             |
| 447 | W38  | OH                                       | O-Glc                   | H              | CH <sub>3</sub>                   | OH               | —               | —             |
| 448 | W38  | O-Glc                                    | H                       | H              | OH                                | CH <sub>3</sub>  | —               | —             |
| 449 | W39  | OH                                       | H                       | H              | CH <sub>3</sub>                   | OH               | CH <sub>3</sub> | —             |
| 450 | W39  | OH                                       | H                       | H              | H                                 | OCH <sub>3</sub> | H               | —             |
| 451 | W39  | OH                                       | OH                      | H              | H                                 | OH               | CH <sub>3</sub> | —             |
| 452 | W39  | OH                                       | O-Glc <sup>2</sup> -Rha | H              | H                                 | OH               | CH <sub>3</sub> | —             |
| 453 | W40  | OH                                       | OH                      | H              | —                                 | —                | —               | —             |
| 454 | W40  | OH                                       | O-Glc                   | H              | —                                 | —                | —               | —             |
| 455 | W41  | OH                                       | OH                      | H              | —                                 | —                | —               | —             |
| 456 | W42  | OH                                       | OAC                     | H              | —                                 | —                | —               | —             |
| 457 | W42  | AC                                       | OH                      | H              | —                                 | —                | —               | —             |
| 458 | W43  | O-AC- <sup>5</sup> Glc <sup>2</sup> -Glc | H                       | H              | Glc                               | OH               | —               | —             |
| 459 | W43  | OH                                       | O-Glc <sup>2</sup> -Rha | H              | Glc                               | OH               | —               | —             |
| 460 | W43  | O-Glc <sup>2</sup> -Glc                  | H                       | H              | Glc                               | OH               | —               | —             |
| 461 | W43  | O-Glc <sup>2</sup> -Glc                  | H                       | H              | Glc <sup>6</sup> -Ara(f)          | OH               | —               | —             |
| 462 | W44  | OH                                       | OH                      | H              | O-Glc                             | —                | —               | —             |
| 463 | W45  | OH                                       | O-Glc                   | H              | —                                 | —                | —               | —             |
| 464 | W45  | OH                                       | O-Glc <sup>2</sup> -Rha | H              | —                                 | —                | —               | —             |



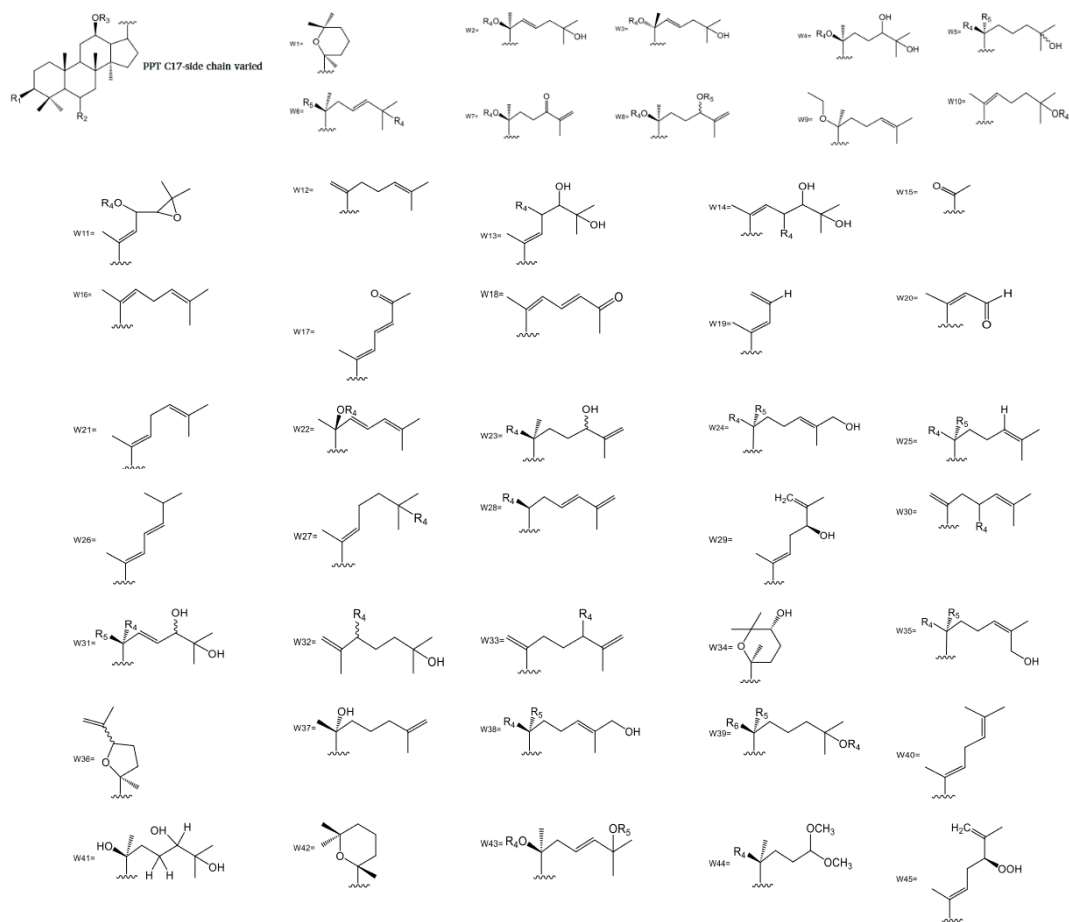

Figure S9. The structure of compounds in *Panax ginseng* C.A. Mey (Part.6)

Table S9 Chemical compositions in *Panax ginseng* C.A. Mey (Part.7)

| NO. | Type | Compound                                                                  | R <sub>1</sub>                                                                                                  | R <sub>2</sub>              | R <sub>3</sub>        | R <sub>4</sub> |
|-----|------|---------------------------------------------------------------------------|-----------------------------------------------------------------------------------------------------------------|-----------------------------|-----------------------|----------------|
| 465 | A    | Baisanqisaponin A                                                         | H                                                                                                               | H                           | X                     | Glc            |
| 466 | A    | Baisanqisaponin B                                                         | H                                                                                                               | Ara(f)                      | X                     | Glc            |
| 467 | A    | Baisanqisaponin C                                                         | Glc                                                                                                             | H                           | X                     | H              |
| 468 | B    | Pseudo-ginsenoside RT <sub>6</sub>                                        | O-Glc                                                                                                           | —                           | —                     | —              |
| 469 | B    | Pseudoginsenosin R <sub>1</sub>                                           | OH                                                                                                              | —                           | —                     | —              |
| 470 | C    | Gypenoside L                                                              | Glc <sup>2</sup> -Glc                                                                                           | H                           | —                     | —              |
| 471 | C    | Gypenoside L <sub>1</sub>                                                 | Glc <sup>2</sup> -Glc                                                                                           | H                           | —                     | —              |
| 472 | D    | 24(R)-Pseudoginsenoside G <sub>1</sub>                                    | Glc <sup>2</sup> -Glc                                                                                           | —                           | —                     | —              |
| 473 | D    | 24(S)-Pseudoginsenoside G <sub>2</sub>                                    | Glc <sup>2</sup> -Glc                                                                                           | —                           | —                     | —              |
| 474 | E    | 3β,4α,12β-trihydroxystigmast-5-en-21-yl octadecan-9',12'-dienoate         | R = CO(CH <sub>2</sub> ) <sub>7</sub> CH=CHCH <sub>2</sub> CH=CH(CH <sub>2</sub> ) <sub>4</sub> CH <sub>3</sub> |                             |                       |                |
| 475 | E    | stigmast-5-en-3β,4α,12β, 21-tetraol-21-octadec-9',12'-dienoate            | R = CO(CH <sub>2</sub> ) <sub>7</sub> CH=CHCH <sub>2</sub> (CH <sub>2</sub> ) <sub>3</sub> CH <sub>3</sub>      |                             |                       |                |
| 476 | F    | 3β-cis-feruloyloxy-16β-hydroxylup-20 (29)-ene                             | S1 <sup>a</sup>                                                                                                 | —                           | —                     | —              |
| 477 | F    | 3β-trans-feruloyloxy-16β-hydroxylup-20 (29)-ene                           | S2 <sup>a</sup>                                                                                                 | —                           | —                     | —              |
| 478 | G    | Notoginsenoside G                                                         | Glc <sup>2</sup> -Glc                                                                                           | Glc                         | —                     | —              |
| 479 | G    | Yesanqinsaponin G                                                         | Glc <sup>2</sup> -Glc                                                                                           | Glc <sup>6</sup> -Xyl       | —                     | —              |
| 480 | G    | Quinqueoside IV                                                           | Glc <sup>2</sup> -Glc                                                                                           | Glc <sup>6</sup> -Glc       | —                     | —              |
| 481 | H    | Notoginsenoside I                                                         | Glc <sup>2</sup> -Glc                                                                                           | O-Glc <sup>6</sup> -Glc     | —                     | —              |
| 482 | H    | Yesanqinsenoside I                                                        | Glc <sup>2</sup> -Glc                                                                                           | O-Glc <sup>6</sup> -Glc-Xyl | —                     | —              |
| 483 | H    | Lanost-24-en-3β-ol-3-O-β-D-arabinopyranosyl-(2'→1'')-O-β-D-arabinoside    | Glc <sup>2</sup> -Ara(p)                                                                                        | CH <sub>3</sub>             | —                     | —              |
| 484 | I    | Vina-ginsenoside R <sub>3</sub>                                           | Glc <sup>2</sup> -Glc                                                                                           | H                           | Glc                   | —              |
| 485 | J    | Chikusetsusaponins LT <sub>5</sub>                                        | Glc                                                                                                             | H                           | Glc <sup>6</sup> -Glc | —              |
| 486 | J    | Chikusetsusaponins LT <sub>8</sub>                                        | Glc                                                                                                             | H                           | Glc                   | —              |
| 487 | J    | Chikusetsusaponin LN <sub>4</sub>                                         | Glc <sup>6</sup> -Xyl                                                                                           | H                           | Glc <sup>6</sup> -Ara | —              |
| 488 | J    | 3β,6α-20(S)-6,20-bis(β-D-glucopyranosyloxy)-3-hydroxy dammar-24-en-12-one | H                                                                                                               | Glc                         | Glc                   | —              |
| 489 | J    | Chikusetsusaponin FK <sub>2</sub>                                         | Glc <sup>2</sup> -Glc                                                                                           | Glc                         | —                     | —              |
| 490 | J    | Chikusetsusaponin FK <sub>3</sub>                                         | Xyl- <sup>6</sup> Glc <sup>2</sup> -Glc                                                                         | Glc                         | —                     | —              |
| 491 | K    | 7β-hydroxyl ginsenoside Rd                                                | O-Glc-Glc <sup>2</sup>                                                                                          | Glc                         | —                     | —              |
| 492 | L    | 5,6-didehydroginsenoside Rg <sub>3</sub>                                  | O-Glc-Glc <sup>2</sup>                                                                                          | OH                          | —                     | —              |
| 493 | L    | 5,6-didehydroginsenoside Rd                                               | Glc <sup>2</sup> -Glc                                                                                           | Glc                         | —                     | —              |
| 494 | L    | 5,6-didehydroginsenoside Rb <sub>1</sub>                                  | Glc <sup>2</sup> -Glc                                                                                           | Glc <sup>6</sup> -Glc       | —                     | —              |
| 495 | M    | Notoginsenoside LX                                                        | Glc                                                                                                             | Glc <sup>6</sup> -Ara(f)    | —                     | —              |
| 496 | M    | Notoginsenoside LY                                                        | H                                                                                                               | Glc <sup>6</sup> -Ara(f)    | —                     | —              |
| 497 | M    | Notoginsenosides Ng <sub>1</sub>                                          | Glc                                                                                                             | Glc <sup>6</sup> -Xyl       | —                     | —              |
| 498 | M    | Notoginsenoside Fh <sub>4</sub>                                           | Glc-Glc                                                                                                         | Glc-Ara(f)                  | —                     | —              |
| 499 | M    | Notoginsenoside Fh <sub>9</sub>                                           | Glc-Glc                                                                                                         | Glc-Ara(p)                  | —                     | —              |
| 500 | M    | Notoginsenoside L14                                                       | Glc                                                                                                             | Glc <sup>6</sup> -Xyl       | C23:S                 | —              |
| 501 | M    | Notoginsenoside L13                                                       | Glc                                                                                                             | Glc <sup>6</sup> -Xyl       | C23:R                 | —              |



Table S9(continued)

| NO. | Type | Compound                                                                                                                                                                                | R <sub>1</sub>        | R <sub>2</sub>          | R <sub>3</sub> | R <sub>4</sub> |
|-----|------|-----------------------------------------------------------------------------------------------------------------------------------------------------------------------------------------|-----------------------|-------------------------|----------------|----------------|
| 502 | M    | 3 $\beta$ ,20S-dihydroxy-12 $\beta$ , 23R-epoxydammar-24-ene 3-O-[ $\beta$ -D-glucopyranosyl (1 $\rightarrow$ 2)- $\beta$ -D-glucopyranosyl]-20-O- $\beta$ -D-glucopyranoside           | Glc <sup>c</sup> -Glc | O-Glc                   | —              | —              |
| 503 | M    | Ginsenosides Ia                                                                                                                                                                         | Glc                   | Glc                     | —              | —              |
| 504 | N    | Ginsenosides Rh <sub>18</sub>                                                                                                                                                           | OH                    | O-Glc <sup>2</sup> -Rha | O-Glc          | —              |
| 505 | N    | 12 $\beta$ ,23(R)-epoxydammar-24-ene-3 $\beta$ ,6 $\alpha$ ,20(S)-triol                                                                                                                 | OH                    | OH                      | OH             | —              |
| 506 | N    | 3 $\beta$ ,6 $\alpha$ , 20S-trihydroxy-12 $\beta$ , 23R-epoxydammar-24-ene 6-O-[ $\alpha$ -L-rhamnosyl (1 $\rightarrow$ 2)- $\beta$ -D-glucopyranosyl]-20-O- $\beta$ -D-glucopyranoside | H                     | O-Glc <sup>2</sup> -Rha | O-Glc          | —              |
| 507 | P    | Notoginsenoside P <sub>1</sub>                                                                                                                                                          | Glc                   | OH                      | —              | —              |
| 508 | Q    | 6-O- $\beta$ -D-glucopyranosyl-20R-protopanaxadiol-3-one                                                                                                                                | Glc                   | H                       | —              | —              |
| 509 | R    | 6-O- $\beta$ -D-glucopyranosyl-20-O- $\beta$ -D-glucopyranosyl-20(S)-protopanaxadiol-3-one                                                                                              | Glc                   | Glc                     | —              | —              |
| 510 | T    | 6 $\alpha$ -hydroxy-22,23,24,25,26,27-hexanordammar-3,12,20-trione                                                                                                                      | Ara(p)                | Ara(p)                  | —              | —              |
| 511 | S    | Dammar-12,24-dien-3 $\alpha$ ,6 $\beta$ ,15 $\alpha$ -triol-3 $\alpha$ -D-arabinopyranosyl-6 $\beta$ -L-arabinopyranoside                                                               | —                     | —                       | —              | —              |
| 512 | U    | Dammar-24-en-3 $\alpha$ ,6 $\beta$ ,16 $\alpha$ ,20 $\beta$ -tetraol-3 $\alpha$ -D-arabinopyranosyl-6 $\beta$ -D-arabinopyranoside                                                      | Xyl                   | Xyl                     | —              | —              |
| 513 | V    | (20S,22S)-dammar-22,25-epoxy-3 $\beta$ ,12 $\beta$ ,20-triol                                                                                                                            | —                     | —                       | —              | —              |
| 514 | W    | Pseudoginsenoside-RU <sub>2</sub>                                                                                                                                                       | —                     | —                       | —              | —              |
| 515 | X    | 12-one-pseudoginsenoside F <sub>11</sub>                                                                                                                                                | Glc <sup>2</sup> -Rha | —                       | —              | —              |
| 516 | Y    | (12R,20S,24S)-20,24-;12,24-diepoxy-dammarane-3 $\beta$ -ol                                                                                                                              | —                     | —                       | —              | —              |

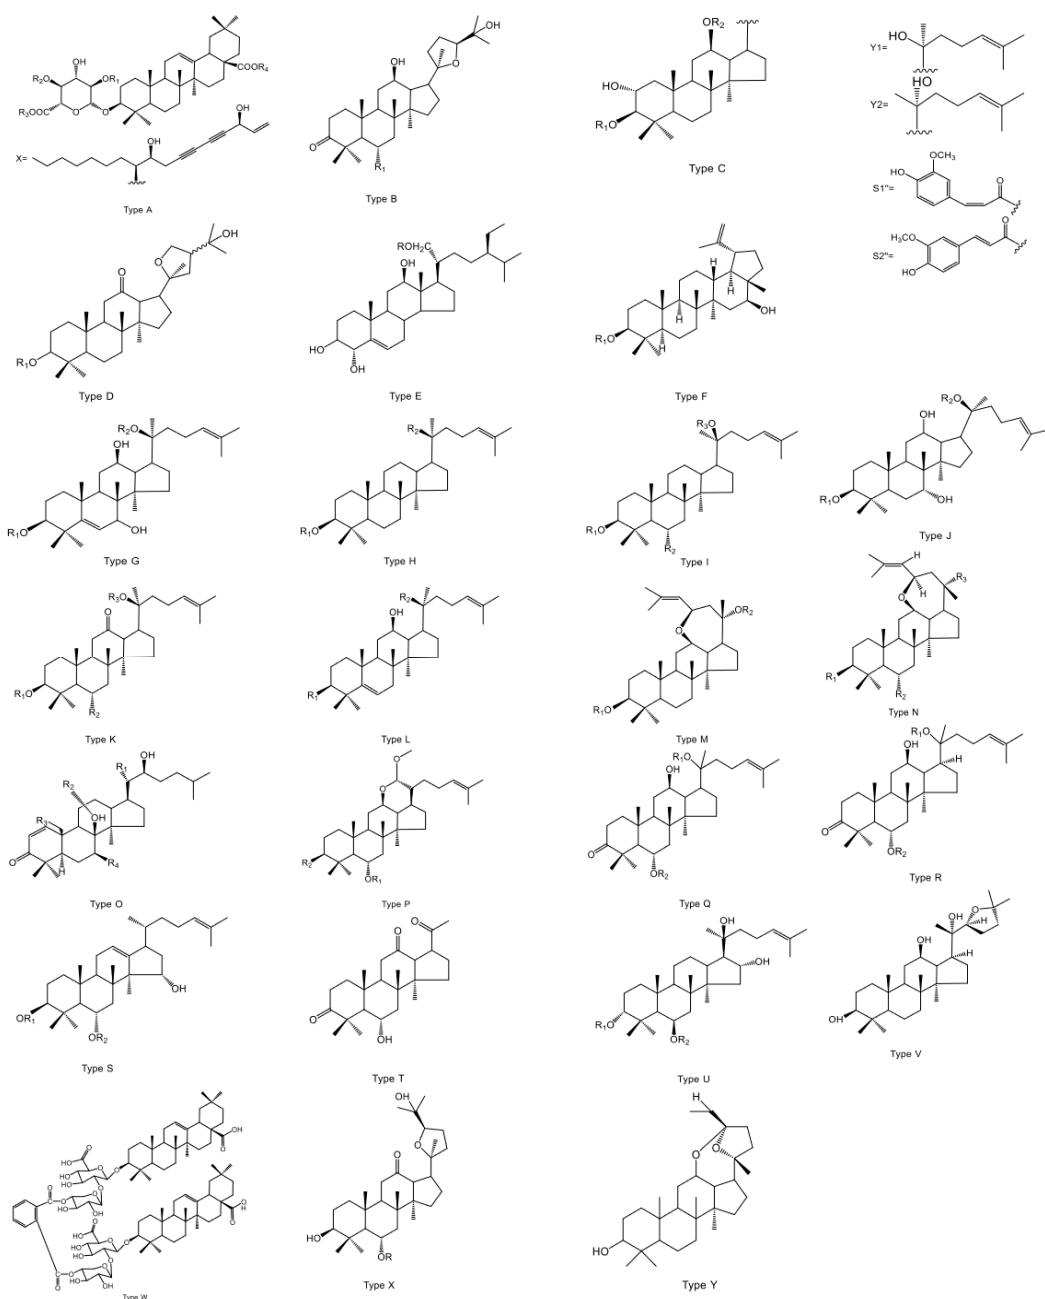Figure S10. The structure of compounds in *Panax ginseng* C.A meyer (Part.7)



Table S10 Chemical compositions in *Ziziphus jujuba* mill. Var

| NO. | Compound                                                                 | NO.  | Compound                                                                                          |
|-----|--------------------------------------------------------------------------|------|---------------------------------------------------------------------------------------------------|
| S1  | Ursolic acid                                                             | F5   | Epiafzelechin                                                                                     |
| S2  | 3-Oxours-12-en-28-oic acid                                               | F6   | Afzelechin                                                                                        |
| S3  | Pomonic acid                                                             | F7   | Rutoside                                                                                          |
| S4  | Pomolic acid                                                             | F8   | Isospinosin                                                                                       |
| S5  | Corosolic Acid                                                           | F9   | Spinosin                                                                                          |
| S6  | 2 $\alpha$ ,3 $\beta$ ,13 $\beta$ ,23-Tetrahydroxurs-11-en-28-oic acid   | F10  | 6'''-sinapoyl spinosin                                                                            |
| S7  | 2 $\alpha$ ,3 $\beta$ -Dihydroxurs-20-en-28-oic acid                     | F11  | 6'''-feruloyl spinosin                                                                            |
| S8  | 2 $\alpha$ ,3 $\beta$ ,28-Trihydroxurs-20-en                             | F12  | 6'''-coumaroyl spinosin                                                                           |
| S9  | 3 $\beta$ ,12 $\beta$ ,13 $\beta$ -Trihydroxurs-28-oic acid              | A-1  | 6-(2',3'-dihydroxy-4'-hydroxymethyl-tetrahydro-furan-1'-yl)<br>cyclopentadiene[c]pyrrole-1,3-diol |
| S10 | Betulnic acid                                                            | A-2  | 3S-1-N- $\beta$ -D-glucopyranosyl-2-oxo-3-hydroxy-indole-3-acetic acid                            |
| S11 | Alphitollic acid                                                         | A-3  | 3R-1-N- $\beta$ -D-glucopyranosyl-2-oxo-3-hydroxy-indole-3-acetic acid                            |
| S12 | Betulonic acid                                                           | A-4  | Coclaurine                                                                                        |
| S13 | 3-O-trans-p-Coumaroylalthitolic acid                                     | A-5  | Juzirine                                                                                          |
| S14 | 3-O-cis-p-Coumaroylalthitolic acid                                       | A-6  | Norisocorynoline                                                                                  |
| S15 | Betulin                                                                  | A-7  | Caaverine                                                                                         |
| S16 | 2 $\alpha$ , 3 $\beta$ -dihydroxy-lup-20(29)-en-28-oic acid methyl ester | A-8  | Asimilobine                                                                                       |
| S17 | 3 $\beta$ -Hydroxy-30-norlupan-20-one-28-oic acid                        | A-9  | Nornuciferine                                                                                     |
| S18 | Oleanic acid                                                             | A-10 | N-Methylasimilobine                                                                               |
| S19 | Oleanonic acid                                                           | A-11 | Nuciferine                                                                                        |
| S20 | 3-O-Trans-p-coumaroyl maslinic acid                                      | A-12 | 4H-Dibenzo[de,g]quinolinium                                                                       |
| S21 | 3-O-cis-p-coumaroyl maslinic acid                                        | A-13 | (+)-magnoflorine iodide                                                                           |
| S22 | Hydroxyoleanonic acid lacton                                             | A-14 | Lysicamine                                                                                        |
| S23 | Maslinic acid                                                            | A-15 | 6-glc-coclaurine                                                                                  |
| S24 | Epiceanothic acid                                                        | A-16 | Sanjoinine A                                                                                      |
| S25 | Ceanothic acid                                                           | A-17 | Sanjoinine F                                                                                      |
| S26 | Zizyberenic acid                                                         | A-18 | Sanjoinine B                                                                                      |
| S27 | Colubrinic acid                                                          | A-19 | Sanjoinine D                                                                                      |
| S28 | Ceanothenic acid                                                         | A-20 | Sanjoinine G1                                                                                     |
| S29 | Cecropiacic acid                                                         | A-21 | Lotusine B                                                                                        |
| S30 | Zizyphus saponin I                                                       | A-22 | Ramosine A                                                                                        |
| S31 | Zizyphus saponin II                                                      | A-23 | Sanjoinine G2                                                                                     |
| F1  | Pinocembrin                                                              | A-24 | Amphibine D                                                                                       |
| F2  | 7, 4'-dihydroxy-5-methoxy flavanon                                       | A-25 | Sanjoinenine                                                                                      |
| F3  | 5,7,3',4'-tetramethoxycatechin                                           | A-26 | Mucronine J                                                                                       |
| F4  | Catechin                                                                 |      |                                                                                                   |

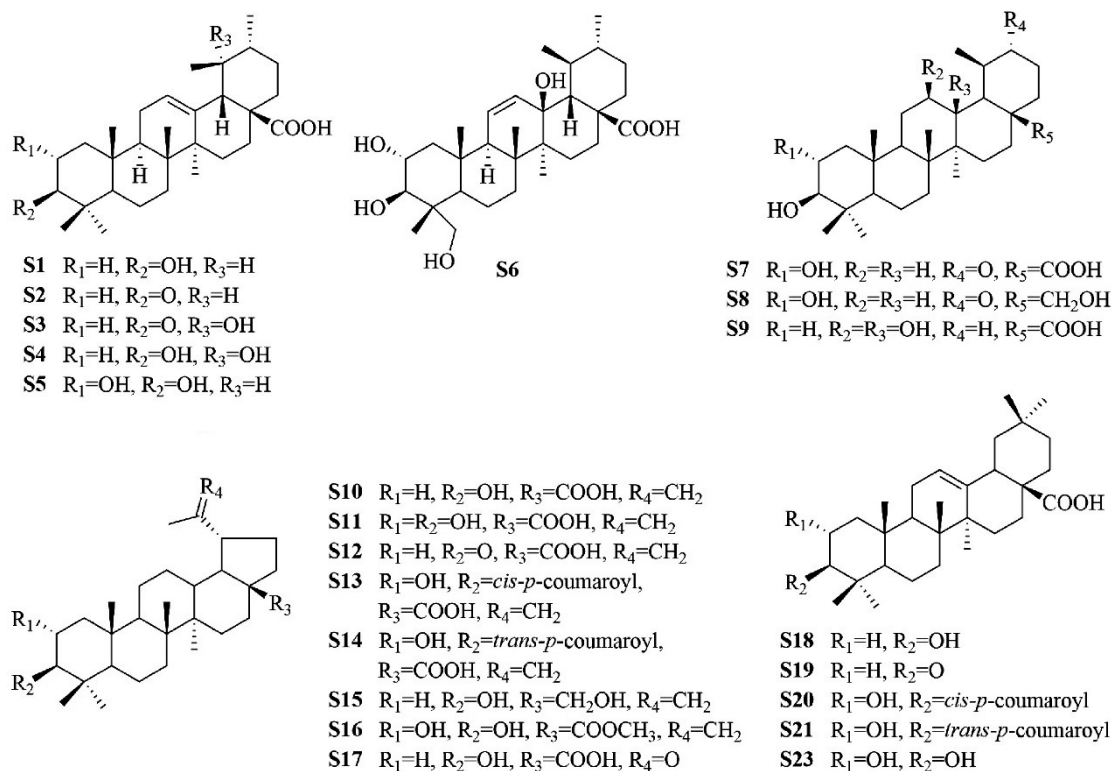Figure S11. The structure of compounds in *Ziziphus jujuba* mill. Var



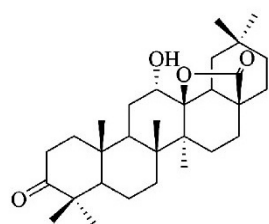

**S22**

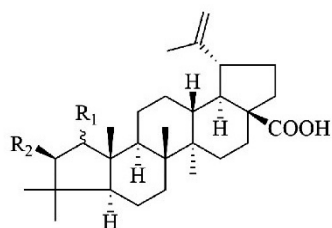

**S24**  $R_1=\alpha\text{COOH}$ ,  $R_2=\alpha\text{OH}$

**S25**  $R_1=\beta\text{COOH}$ ,  $R_2=\alpha\text{OH}$

**S27**  $R_1=\alpha\text{CHO}$ ,  $R_2=\beta\text{OH}$

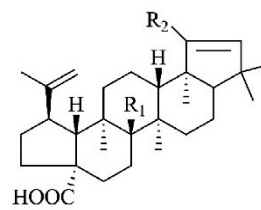

**S26**  $R_1=\text{CH}_3$ ,  $R_2=\text{CHO}$

**S28**  $R_1=\text{COOH}$ ,  $R_2=\text{H}$

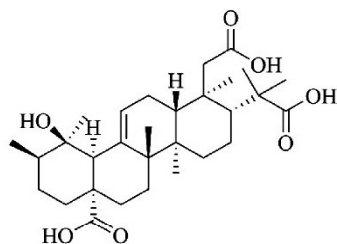

**S29**

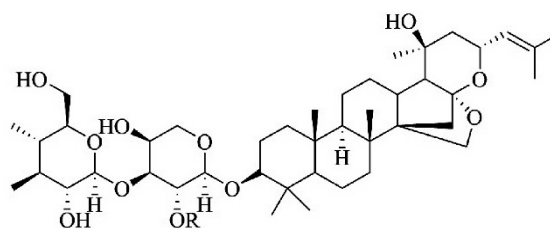

**S30**  $R=O\text{-}6\text{-deoxy-}\alpha\text{-L-Tal}$

**S31**  $R=O\text{-}6\text{-deoxy-}\alpha\text{-L-Man}$

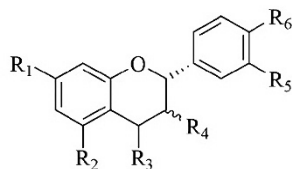

**F1**  $R_1=R_2=\text{OH}$ ,  $R_3=\text{O}$ ,  $R_4=R_5=R_6=\text{H}$

**F2**  $R_1=R_6=\text{OH}$ ,  $R_2=\text{OCH}_3$ ,  $R_3=\text{O}$ ,  $R_4=R_5=\text{H}$

**F3**  $R_1=R_2=R_5=R_6=\text{OCH}_3$ ,  $R_3=\text{H}$ ,  $R_4=\beta\text{OH}$

**F4**  $R_1=R_2=R_5=R_6=\text{OH}$ ,  $R_3=\text{H}$ ,  $R_4=\beta\text{OH}$

**F5**  $R_1=R_2=R_6=\text{OH}$ ,  $R_3=R_5=\text{H}$ ,  $R_4=\alpha\text{OH}$

**F6**  $R_1=R_2=R_6=\text{OH}$ ,  $R_3=R_5=\text{H}$ ,  $R_4=\beta\text{OH}$

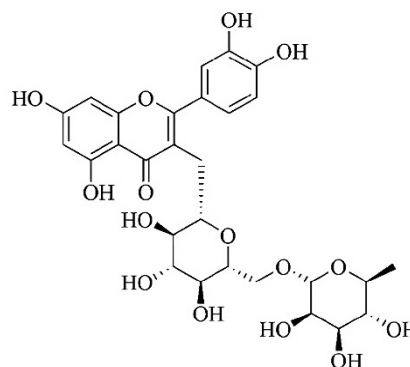

**F7**

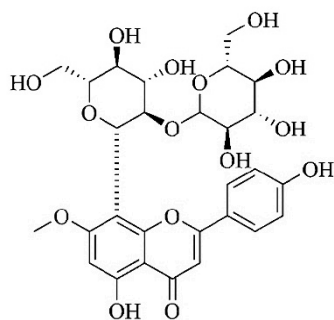

**F8**

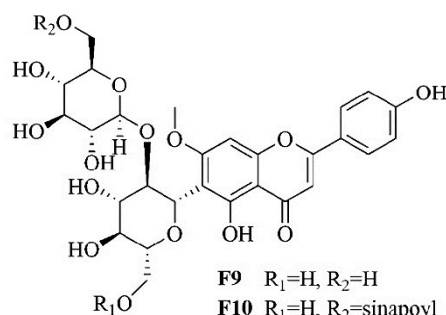

**F9**  $R_1=\text{H}$ ,  $R_2=\text{H}$

**F10**  $R_1=\text{H}$ ,  $R_2=\text{sinapoyl}$

**F11**  $R_1=\text{H}$ ,  $R_2=\text{feruloyl}$

**F12**  $R_1=\text{H}$ ,  $R_2=p\text{-coumaroyl}$

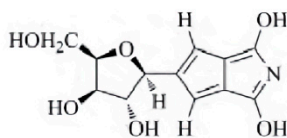

**A-1**

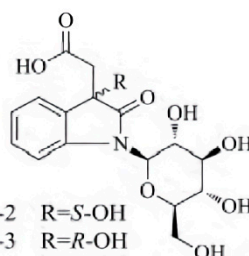

**A-2**  $R=\text{S-OH}$   
**A-3**  $R=R\text{-OH}$

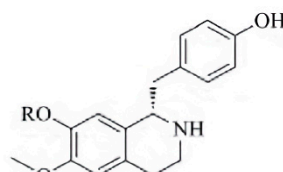

**A-4**  $R=\text{H}$   
**A-15**  $R=\text{Glu}$

Figure S11 (continued)



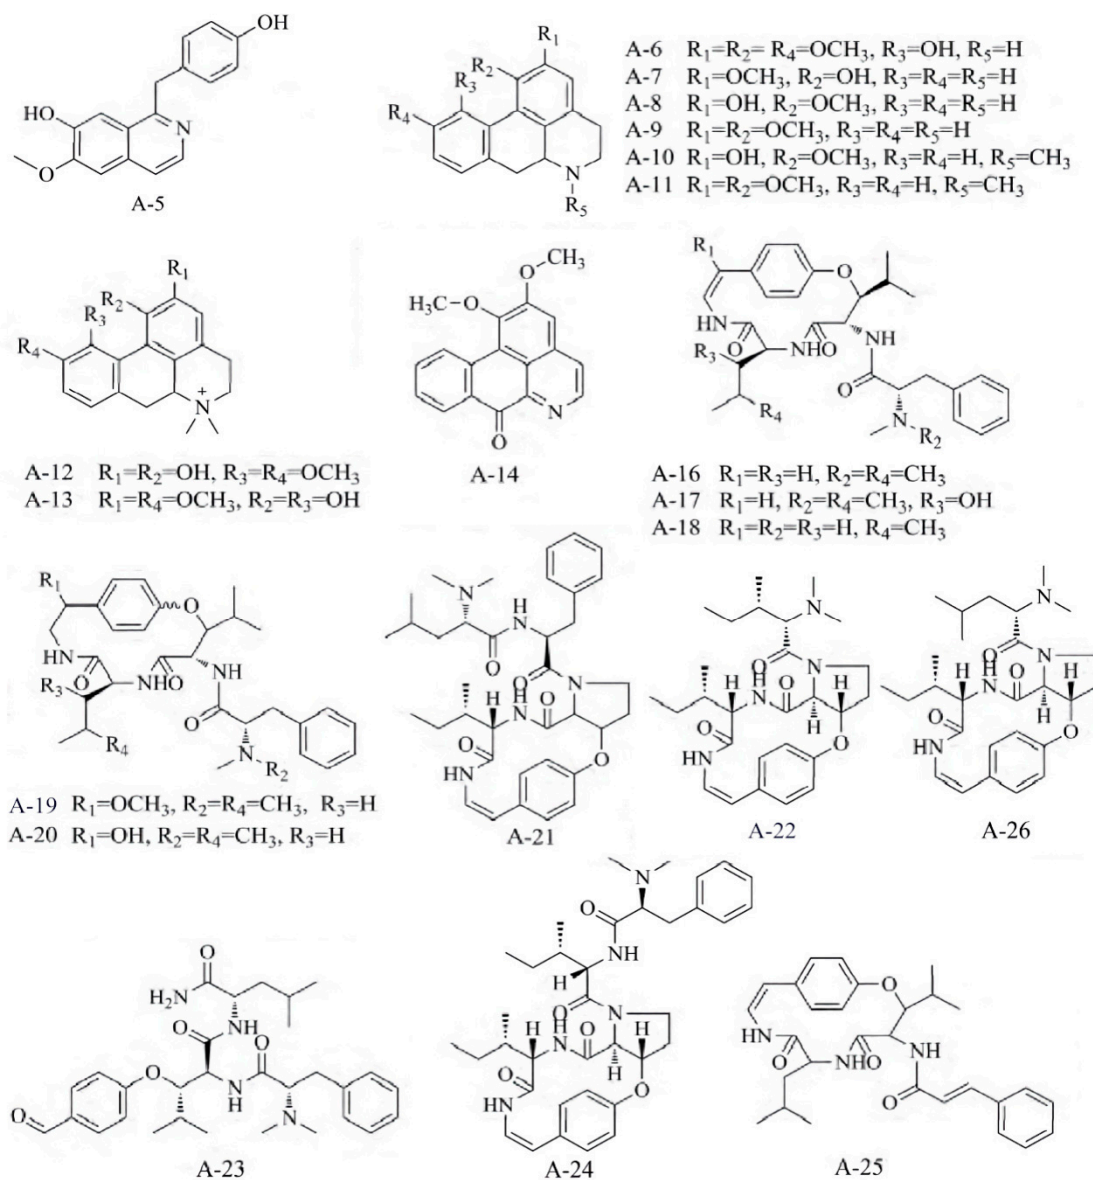

Figure S11 (continued)

Table S11 Chemical compositions in *Bambusa tuldois* munro

| No. | Compound                                                                                                            | No. | Compound                      |
|-----|---------------------------------------------------------------------------------------------------------------------|-----|-------------------------------|
| 1   | (1S,2R)-1,2-bis(4-hydroxy-3-methoxyphenyl)-1,3-propanediol                                                          | 9   | (+)-lyoniresinol              |
| 2   | 2-Propenal, 3-[4-[(1S,2R)-2-hydroxy-2-(4-hydroxy-3-methoxyphenyl)-1-(hydroxymethyl)ethoxy]-3-methoxyphenyl]-, (2E)- | 10  | Isolariciresinol 9,9'-acetone |
| 3   | erythro-Guaiacylglycerol $\beta$ -dihydroconiferyl ether                                                            | 11  | 2,6-Dimethyl-4H-pyran-4-one   |
| 4   | 5'-Methoxylariciresinol                                                                                             | 12  | Friedelin                     |
| 5   | 5,5'-Dimethoxylariciresinol                                                                                         | 13  | Friedelanol                   |
| 6   | (+)-glaberridin I                                                                                                   | 14  | Lupenone                      |
| 7   | (-)-Syringaresinol                                                                                                  | 15  | Lupeol                        |
| 8   | (-)-medioresinol                                                                                                    | 16  | alpha-Amyrin                  |



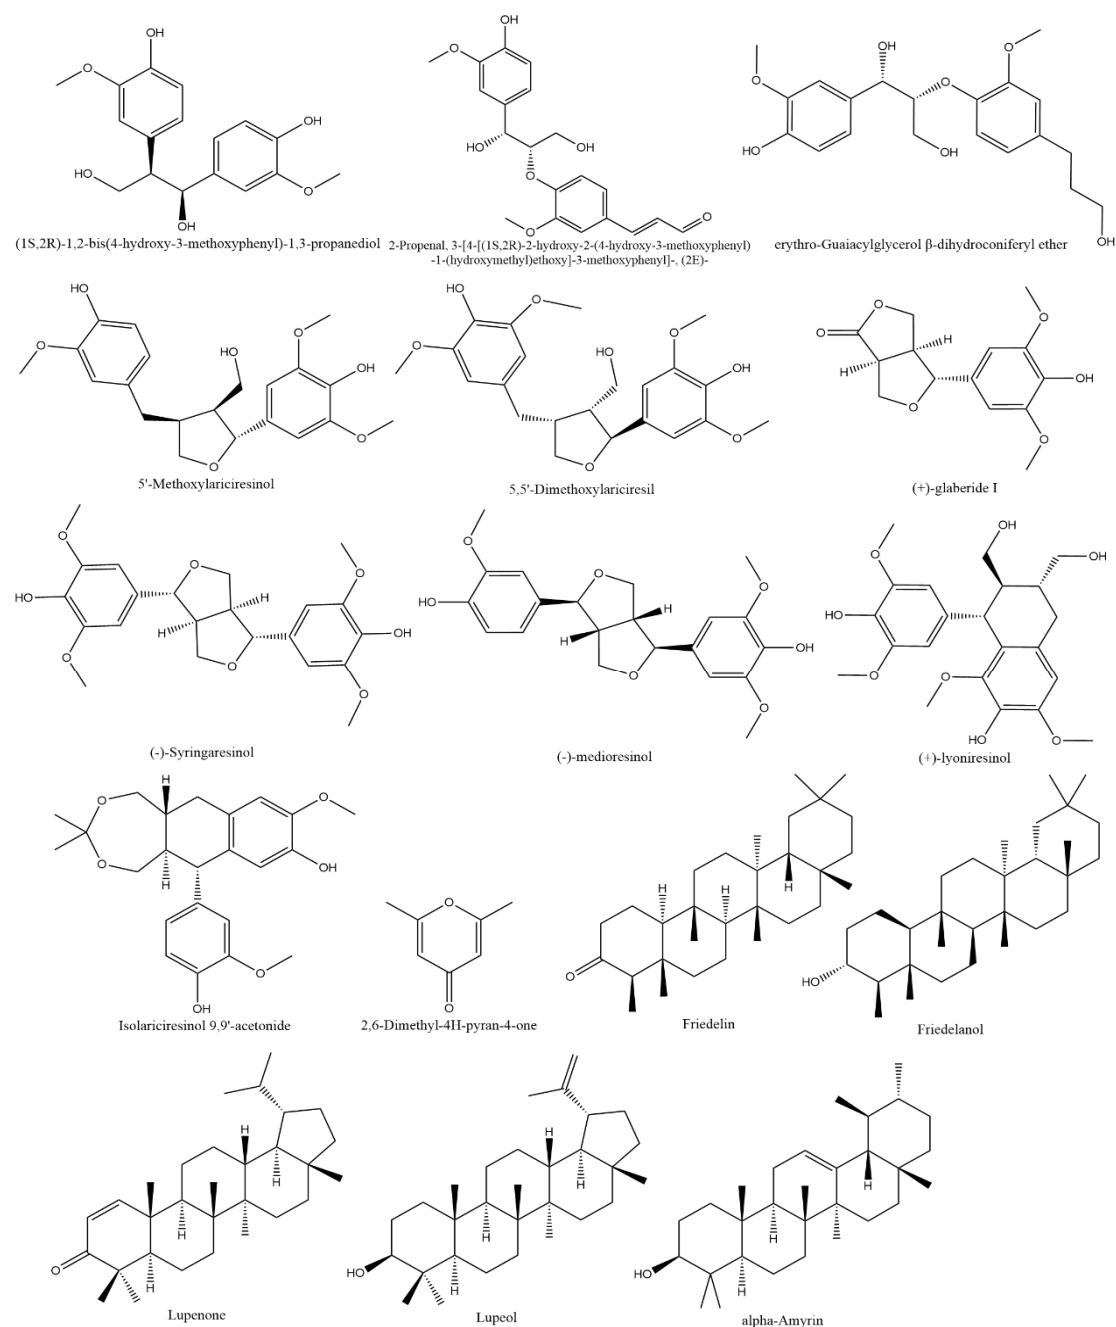

Figure S12. The structure of compounds in *Bambusa tuldois* munro

Table S12 Chemical compositions in *Physochlaina infundibularis* kuang

| No. | Compound    | No. | Compound                       |
|-----|-------------|-----|--------------------------------|
| S1  | Scopolamine | S11 | 6, 7-dimethoxycoumarin         |
| S2  | Anisodamine | S12 | 3-O-Methylquercetin            |
| S3  | Hyoscyamine | S13 | Isoquercitrin                  |
| S4  | Atropine    | S14 | Kaempferol 7-O-glucoside       |
| S5  | Scopoline   | S15 | Syringarenol                   |
| S6  | choline     | S16 | Protocatechuic acid            |
| S7  | Scopoletin  | S17 | Methyl 4-hydroxymethylbenzoate |
| S8  | Scopolin    | S18 | 2-hydroxybenzoic acid          |
| S9  | Fabiatrin   | S19 | 4-hydroxy-benzoic acid         |
| S10 | Umbellifero |     |                                |



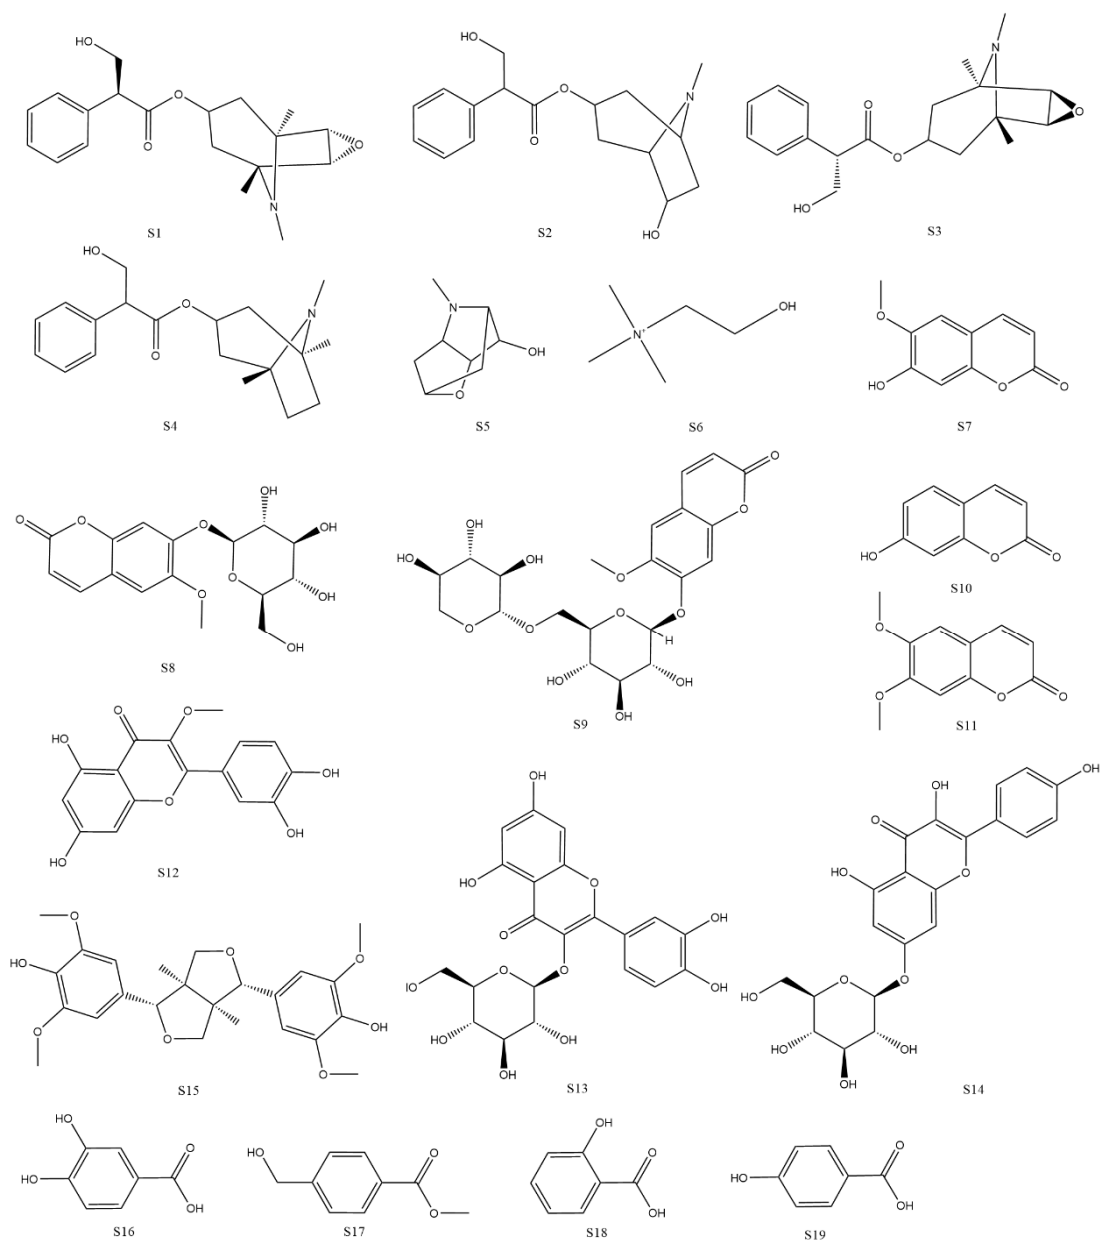

Figure S13. The structure of compounds in *Physochlaina infundibularis* kuang



Table S13 The main compound in *Ganoderma lucidum*

| Cpd | Name                                                                                                                                   |
|-----|----------------------------------------------------------------------------------------------------------------------------------------|
| 1   | n-Butyl ganoderate H (n-butyl 12 $\beta$ -acetoxy-3 $\beta$ -hydroxy-7,11,15, tetraoxo-5 $\alpha$ -lanost-8-en-Cheng et al. 2010-oate) |
| 2   | Butyl ganoderate A                                                                                                                     |
| 3   | Butyl ganoderate B                                                                                                                     |
| 4   | Ganoderic acid $\alpha$ (12 $\beta$ -acetoxy-3 $\beta$ , 15 $\beta$ -dihydroxy-7,11,23-trioxo-5 $\alpha$ -lanosta-8-en-26-oic acid)    |
| 5   | Ganolucidic acid A                                                                                                                     |
| 6   | Methyl ganolucide A (methyl 15 $\alpha$ -hydroxy-3,11,23-trioxo-5 $\alpha$ -lanost-8-en-26-oate)                                       |
| 7   | Ganolucidic acid B                                                                                                                     |
| 8   | Methyl ganolucide B                                                                                                                    |
| 9   | Ganoderic acid A (7 $\beta$ , 15 $\alpha$ -dihydroxy-3,11,23-trioxo-5 $\alpha$ -lanost-8-en-26-oic acid)                               |
| 10  | Methyl ganoderate A (methyl 7 $\beta$ , 15 $\alpha$ -dihydroxy-3,11,23-trioxo-5 $\alpha$ -lanost-8-en-26-oate)                         |
| 11  | Methyl ganoderate A (methyl 7 $\beta$ , 15 $\alpha$ -dihydroxy-3,11,23-trioxo-5 $\alpha$ -lanost-8-en-26-oate)                         |
| 12  | Methyl ganoderate B (methyl 3 $\beta$ , 7 $\beta$ -dihydroxy-11,15,23-trioxo-5 $\alpha$ -lanost-8-en-26-oate)                          |
| 13  | Ganoderic acid C (3 $\beta$ , 7 $\beta$ , 15 $\alpha$ -trihydroxy-11,23-dioxo-5 $\alpha$ -lanost-8-en-26-oic acid)                     |
| 14  | Methyl ganoderate C                                                                                                                    |
| 15  | Ganoderic acid D (7 $\beta$ -hydroxy-3,11,15,23-tetraoxo-5 $\alpha$ -lanost-8-en-26-oic acid)                                          |
| 16  | Methyl ganoderate D                                                                                                                    |
| 17  | Methyl ganoderate C 2 (methyl 3 $\beta$ , 7 $\beta$ , 15 $\alpha$ -trihydroxy-11,23-dioxo-5 $\alpha$ -lanost-8-en-26-oate)             |
| 18  | Methyl ganoderate K                                                                                                                    |
| 19  | Compound B <sub>8</sub>                                                                                                                |
| 20  | Compound B <sub>9</sub>                                                                                                                |
| 21  | 3 $\beta$ -Oxo-formyl-7 $\beta$ , 12 $\beta$ -dihydroxy-5 $\alpha$ -lanost-11,15,23-trioxo-8-en(E)-26-oic acid                         |
| 22  | Ganoderic acid B <sub>8</sub>                                                                                                          |
| 23  | Ganoderic acid C <sub>1</sub>                                                                                                          |
| 24  | 12 $\beta$ -Acetoxy-3,7,11,15,23-pentaoxo-5 $\alpha$ -lanosta-8-en-26-oic acid ethyl ester                                             |
| 25  | 3 $\beta$ , 7 $\beta$ -Dihydroxy-12 $\beta$ -acetoxy-11,15,23-trioxo-5 $\alpha$ -lanosta-8-en-26-oic acid methyl ester                 |
| 26  | 3 $\beta$ -Hydroxy-7,11,12,15,23-pentaoxolanost-8-en-26-oic acid                                                                       |
| 27  | Ganoderic acid Df (7 $\beta$ , 11 $\beta$ -dihydroxy-3,15,23-trioxo-5 $\alpha$ -lanosta-8-                                             |



|    |                                                                                                                             |
|----|-----------------------------------------------------------------------------------------------------------------------------|
|    | en-26-oic acid)                                                                                                             |
| 28 | Ganoderic acid H                                                                                                            |
| 29 | Ganoderic acid F (12 $\beta$ -acetoxy-3,7,11,15-pentaoxo-5 $\alpha$ -lanost-8-en-26-oic acid)                               |
| 30 | Ganoderic acid E (3,7,11,15,23-pentaoxo-5 $\alpha$ -lanost-8-en-26-oic acid)                                                |
| 31 | Ganoderic acid K                                                                                                            |
| 32 | Ganoderic acid AM <sub>1</sub>                                                                                              |
| 33 | Ganoderic acid J                                                                                                            |
| 34 | Ganoderic acid C2 (3 $\beta$ , 7 $\beta$ , 15 $\alpha$ -trihydroxy-11,23-dioxo-5 $\alpha$ -lanosta-8-en-26-oic acid)        |
| 35 | Ganoderic acid G (3 $\beta$ , 7 $\beta$ , 15 $\beta$ -trihydroxy-11,15,23-trioxo-5 $\alpha$ -lanosta-8-en-26-oic acid)      |
| 36 | 7 $\beta$ , 12 $\beta$ -Dihydroxy-3,11,15,23-tetraoxo-5 $\alpha$ -lanosta-8-en-26-oic acid                                  |
| 37 | 12 $\beta$ -Hydroxy-3,7,11,15,23-pentaoxo-5 $\alpha$ -lanosta-8-en-26-oic acid                                              |
| 38 | Methyl ganoderate D (methyl 3 $\beta$ , 7 $\beta$ , 15 $\alpha$ -trihydroxy-11,23-dioxo-5 $\alpha$ -lanost-8-en-26-oate)    |
| 39 | Methyl ganoderate E (methyl 3 $\beta$ , 7 $\beta$ , 15 $\alpha$ -trihydroxy-11,23-dioxo-5 $\alpha$ -lanost-8-en-26-oate)    |
| 40 | Methyl ganoderate F (methyl 12 $\beta$ -acetoxy-3,7,11,15,23-pentaoxo-5 $\alpha$ -lanost-8-en-26-oate)                      |
| 41 | Methyl ganoderate H (methyl 3 $\beta$ -hydroxy-12 $\beta$ -acetoxy-7,11,15,23-tetraoxo-5 $\alpha$ -lanost-8-en-26-oate)     |
| 42 | Methyl ganoderate G (methyl 3 $\beta$ , 7 $\beta$ , 12 $\beta$ -trihydroxy-11,15,23-trioxo-5 $\alpha$ -lanost-8-en-26-oate) |
| 43 | Compound C <sub>5</sub>                                                                                                     |
| 44 | Compound C <sub>6</sub>                                                                                                     |
| 45 | Ganoderic acid AP3 (15 $\alpha$ , 20 $\xi$ -dihydroxy-3,7,11,23-tetraoxolanost-8-en-26-oic acid)                            |
| 46 | 23-Dihydroganoderic acid I (3 $\beta$ , 7 $\beta$ , 20,23 $\xi$ -tetrahydroxy-11,15-dioxolanosta-8-en-26-oic acid)          |
| 47 | 23-Dihydroganoderic acid N (7 $\beta$ , 20,23 $\xi$ -trihydroxy-3,11,15-trioxolanosta-8-en-26-oic acid)                     |
| 48 | 20-Hydroxylganoderic acid G                                                                                                 |
| 49 | Ganoderic acid I                                                                                                            |
| 50 | Methyl ganoderate I                                                                                                         |
| 51 | Methyl ganoderate AP (methyl 12 $\beta$ , 15 $\alpha$ , 20-trihydroxy-3,7,11,23-tetraoxo-5 $\alpha$ -lanost-8-en-26-oate)   |
| 52 | Methyl ganoderate N (Methyl 7 $\beta$ , 20-dihydroxy-3,11,15,23-tetraoxo-5 $\alpha$ -lanost-8-en-26-oate)                   |
| 53 | Methyl ganoderate M (methyl 7 $\beta$ , 12 $\alpha$ -dihydroxy-3,11,15,23-tetraoxo-5 $\alpha$ -lanost-8-en-26-oate)         |
| 54 | 3-O-Acetyl ganoderic acid B (3 $\beta$ -acetoxy-7 $\beta$ -hydroxy-11,15,23-trioxolanost-8-en-26-oic acid)                  |



|    |                                                                                                              |
|----|--------------------------------------------------------------------------------------------------------------|
| 55 | 3-O-Acetylganoderic acid K (3 $\beta$ -acetyloxy-15 $\alpha$ -hydroxy-7,11,23-trioxolanost-8-en-26-oic acid) |
| 56 | Ethyl 3-O-acetylganoderate B                                                                                 |
| 57 | Ethyl ganoderate J                                                                                           |
| 58 | Leucocontextin S                                                                                             |
| 59 | Leucocontextin T                                                                                             |
| 60 | Leucocontextin U                                                                                             |
| 61 | 3 $\alpha$ -Carboxyacetoxy-24-methylene-23-oxolanost-8-en-26-oic acid                                        |
| 62 | 3 $\alpha$ -Carboxyacetoxy-24-methyl-23-oxolanost-8-en-26-oic acid                                           |
| 63 | Ganoderoid E                                                                                                 |
| 64 | Ganoderoid G                                                                                                 |
| 65 | 3 $\beta$ ,7 $\beta$ ,15 $\alpha$ ,24-Tetrahydroxy-11,23-dioxo-lanost-8-en-26-oic Acid                       |
| 66 | 24S,25R-dihydroxy-3,7-dioxo-8-en-5 $\alpha$ -lanosta-26-ol                                                   |
| 67 | (24S)-3-oxo-7 $\alpha$ ,15 $\alpha$ ,24,25-tetrahydroxylanosta-8-ene                                         |
| 68 | Ganodaustralic acid A                                                                                        |
| 69 | Ganoderense H                                                                                                |
| 70 | Ganoderense I                                                                                                |
| 71 | Ganoderiol D                                                                                                 |
| 72 | 7 $\beta$ ,15 $\beta$ ,28-Trihydroxy-3,11,23-trioxolanost-8-en-26-oate                                       |
| 73 | 3 $\beta$ ,7 $\beta$ ,15 $\beta$ -Trihydroxy-11,23-dioxolanost-8-en-26-oate                                  |
| 74 | 15 $\beta$ ,20-Dihydroxy-3,7,11,23-tetraoxolanost-8-en-26-oate                                               |
| 75 | Ganohainanic acid A                                                                                          |
| 76 | Acetyl ganohainanic acid A                                                                                   |
| 77 | Ganohainanic acid B                                                                                          |
| 78 | Ganohainanic acid C                                                                                          |
| 79 | Ganohainanic acid D                                                                                          |
| 80 | Acetyl ganohainanic acid C                                                                                   |
| 81 | Lucidumol A ((24S)-24,25-dihydroxylanost-8-ene-3,7-dione)                                                    |
| 82 | Ganoderiol C (7 $\alpha$ -ethoxy-24,25,26-trihydroxy-5 $\alpha$ -lanost-8-en-3-one)                          |
| 83 | Ganoderiol D (24,25,26-trihydroxy-5 $\alpha$ -lanost-8-en-3,7-dione)                                         |
| 84 | Ganoderiol G (24,25,26-trihydroxy-7 $\alpha$ -methoxy-5 $\alpha$ -lanost-8-en-3-one)                         |
| 85 | Applanic acids A                                                                                             |
| 86 | (20E)-3 $\beta$ ,7 $\beta$ ,15 $\beta$ -Trihydroxy-11,23-dioxolanost-8,20(22)-dien-26-oate                   |
| 87 | (20E)-3 $\beta$ ,15 $\beta$ -Dihydroxy-7,11,23-trioxolanost-8,20(22)-dien-26-oate                            |
| 88 | (20E)-3 $\beta$ ,7 $\beta$ -Dihydroxy-11,23-dioxolanost-8,20(22)-dien-26-oic acid                            |
| 89 | (20E)-15 $\beta$ -Hydroxy-3,7,11,23-tetraoxolanost-8,20(22)-dien-26-oic acid                                 |
| 90 | (20E)-7 $\beta$ ,15 $\beta$ ,28-Trihydroxy-3,11,23-trioxolanost-8,20(22)-dien-26-oate                        |
| 91 | 3 $\beta$ -hydroxy-12 $\beta$ -acetoxy-7,11,15,23-tetraoxolanosta-8,20E(22)-dien-26-oic acid methyl ester    |
| 92 | 15 $\alpha$ -hydroxy-3,11,23-trioxolanosta-8,20E(22)-dien-26-oic acid methyl ester                           |



|     |                                                                                                                                     |
|-----|-------------------------------------------------------------------------------------------------------------------------------------|
| 93  | 12 $\beta$ -Acetoxy-3 $\beta$ -hydroxy-7,11,15,23-tetraoxo-lanost-8,20 $E$ -diene-26-oic acid                                       |
| 94  | 23-Dihydroganoderenic acid D (7 $\beta$ , 23 $\xi$ -dihydroxy-3,11,15-trioxolanosta-8,20 $E$ (22)-dien-26-oic acid)                 |
| 95  | Methyl ganoderenate D (7 $\beta$ -hydroxy-3,11,15,23-tetraoxolanosta-8,20 $E$ (22)-dien-26-oic acid methyl ester)                   |
| 96  | Ganoderenic acid A ((20 $E$ )-7 $\beta$ , 15 $\alpha$ -dihydroxy-3,11,23-trioxo-5 $\alpha$ -lanost-8,20-dien-26-oic acid)           |
| 97  | Ganoderenic acid B ((20 $E$ )-3 $\beta$ , 7 $\beta$ -dihydroxy-11,15,23-trioxo-5 $\alpha$ -lanost-8,20-dien-26-oic acid)            |
| 98  | Ganoderenic acid C ((20 $E$ )-3 $\beta$ , 7 $\beta$ , 15 $\alpha$ -trihydroxy-11,23-dioxo-5 $\alpha$ -lanost-8,20-dien-26-oic acid) |
| 99  | Ganoderenic acid D ((20 $E$ )-7 $\beta$ -hydroxy-3,11,15,23-tetraoxo-5 $\alpha$ -lanost-8,20-dien-26-oic acid)                      |
| 100 | 12 $\beta$ -Acetoxy-7 $\beta$ -hydroxy-3,11,15,23-tetraoxo-5 $\alpha$ -lanosta-8,20-dien-26-oic acid                                |
| 101 | Ganoderenic acid F (3,7,11,15,23-pentaoxo-5 $\alpha$ -lanosta-8,20 $E$ -dien-26-oic acid)                                           |
| 102 | Ganoderenic acid G (15 $\alpha$ -hydroxy-3,7,11,23-tetraoxo-5 $\alpha$ -lanosta-8,20 $E$ -dien-26-oic acid)                         |
| 103 | Methyl ganoderenate H (methyl 3 $\beta$ -hydroxy-7,11,15,23-tetraoxo-5 $\alpha$ -lanosta-8,20 $E$ -dien-26-oate)                    |
| 104 | Methyl ganoderenate I (3 $\beta$ , 15 $\alpha$ -dihydroxy-7,11,23-trioxo-5 $\alpha$ -lanosta-8,20 $E$ -dien-26-oate)                |
| 105 | Ganoderenic acid H                                                                                                                  |
| 106 | 12 $\beta$ -Acetoxy-3 $\beta$ , 7 $\beta$ -dihydroxy-11,15,23-trioxo-5 $\alpha$ -lanosta-8,20-dien-26-oic acid                      |
| 107 | Gibbosic acid I                                                                                                                     |
| 108 | Gibbosic acid J                                                                                                                     |
| 109 | Gibbosic acid K                                                                                                                     |
| 110 | Methyl ganoderenate E (7 $\beta$ , 12 $\beta$ -dihydroxy-3,11,15,23-tetraoxo-5 $\alpha$ -lanosta-8,20 $E$ -dien-26-oate)            |
| 111 | 12 $\beta$ -acetoxy-3,7,11,15,23-pentaoxo-lanost-8,20 $E$ -dien-26-oic acid                                                         |
| 112 | Ganoderic acid GS-1 (7 $\beta$ -hydroxy-3,11,15-trioxolanosta-8,24( $E$ )-dien-26-oic acid)                                         |
| 113 | Ganoderic acid GS-2 (7 $\beta$ ,15 $\alpha$ -dihydroxy-3,11-dioxolanosta-8,24( $E$ )-dien-26-oic acid)                              |
| 114 | Ganoderic acid GS-3 (12 $\beta$ -acetoxy-3 $\beta$ , 7 $\beta$ -dihydroxy-11,15-dioxo-lanosta-8,24( $E$ )-dien-26-oic acid)         |
| 115 | Ganoderic acid AP 2 (12 $\beta$ , 15 $\alpha$ -diacetoxy-3 $\beta$ -hydroxy-11-oxolanost-8,24( $E$ )-dien-26-oic acid)              |
| 116 | 23 $S$ -Hydroxy-3,7,11,15-tetraoxolanost-8,24 $E$ -diene-26-oic acid                                                                |
| 117 | 7-Oxoganoderic acid Z (3 $\beta$ -hydroxy-7-oxo-5 $\alpha$ -lanosta-8,24( $E$ )-dien-26-oic acid)                                   |
| 118 | Ganoderic acid LM2 ((23 $S$ ) 7 $\beta$ ,dihydroxy-3,11,15-trioxo-5 $\alpha$ -lanosta-8,24-dien-26-oic acid)                        |



|     |                                                                                                                                      |
|-----|--------------------------------------------------------------------------------------------------------------------------------------|
| 119 | Lucialdehyde B ((24E)-3,7-dioxo-5 $\alpha$ -lanosta-8,24-dien-26-al)                                                                 |
| 120 | Lucialdehyde C ((24E)-3 $\beta$ -hydroxy-7-oxo-5 $\alpha$ -lanosta-8,24-dien-26-al)                                                  |
| 121 | Ganoderic acid $\gamma$ ((23S)-7 $\beta$ , 15 $\alpha$ , 23-trihydroxy-3,11-dioxolanosta-8,24(E)-diene-26-oic acid)                  |
| 122 | Ganoderic acid $\delta$ ((23S)-7 $\alpha$ , 15 $\alpha$ , 23-trihydroxy-3,11-dioxolanosta-8,24(E)-diene-26-oic acid)                 |
| 123 | Ganoderic acid $\epsilon$ ((23S)-3 $\beta$ , 7 $\beta$ , 23-trihydroxy-11,15-dioxolanosta-8,24(E)-diene-26-oic acid)                 |
| 124 | Ganoderic acid $\zeta$ ((23S)-3 $\beta$ , 23-dihydroxy-7,11,15-trioxolanosta-8,24(E)-diene-26-oic acid)                              |
| 125 | Ganoderic acid $\eta$ ((23S)-3 $\beta$ , 7 $\beta$ , 12 $\beta$ , 23-tetrahydroxy-11,15-dioxolanosta-8,24(E)-diene-26-oic acid)      |
| 126 | Ganoderic acid $\theta$ ((23S)-3 $\beta$ , 12 $\beta$ , 23-trihydroxy-7,11,15-trioxolanosta-8,24(E)-diene-26-oic acid)               |
| 127 | Ganoderic acid $\beta$ (3 $\beta$ , 7 $\beta$ -dihydroxy-11,15-dioxolanosta-8,24(E)-dien-26-oic acid)                                |
| 128 | Ganolucidic acid E (15 $\alpha$ -hydroxy-3,11-dioxo-5 $\alpha$ -lanosta-8,24E-dien-26-oic acid)                                      |
| 129 | Ganoderal B (7 $\alpha$ -hydroxy-3-oxo-5 $\alpha$ -lanosta-8,24E-dien-26-al)                                                         |
| 130 | Ganoderic acid Ma (3 $\alpha$ , 7 $\alpha$ -diacetoxy-15 $\alpha$ -hydroxy-5 $\alpha$ -lanost-8,24E-dien-26-oic acid)                |
| 131 | Lucialdehyde D (3,7,11-trioxo-5 $\alpha$ -lanosta-8,24-diene-26-al)                                                                  |
| 132 | Ganoderone A (5 $\alpha$ -lanosta-8,24-diene-26-hydroxy-3,7-dione)                                                                   |
| 133 | ganoderic acid Mi (3 $\alpha$ -acetoxy-15 $\alpha$ -hydroxy-7 $\alpha$ -methoxy-5 $\alpha$ -lanost-8,24E-dien-26-oic acid)           |
| 134 | 11 $\alpha$ -Hydroxy-3,7-dioxo-5 $\alpha$ -lanosta-8,24(E)-dien-26-oic acid                                                          |
| 135 | 11 $\beta$ -Hydroxy-3,7-dioxo-5 $\alpha$ -lanosta-8,24(E)-dien-26-oic acid                                                           |
| 136 | Lucidiol (5 $\alpha$ -lanosta-8,24-dien-3 $\beta$ , 26-dihydroxy-7-one)                                                              |
| 137 | Lucidal (5 $\alpha$ -lanosta-8,24E-dien-3 $\beta$ -hydroxy-7-on-26-al)                                                               |
| 138 | Ganoderic acid DM (3,7-dioxo-8,24(E)-dien-lanosta-26-oic acid)                                                                       |
| 139 | Ganoderic acid V                                                                                                                     |
| 140 | Ganolucidic acid $\gamma$ a (3 $\beta$ , 7 $\beta$ , 15 $\alpha$ , 23-tetrahydroxy-11-oxo-5 $\alpha$ -lanosta-8,24-dien-26-oic acid) |
| 141 | Ganolucidic acid F (3 $\beta$ , 15 $\alpha$ , 23-trihydroxy-11-oxo-5 $\alpha$ -lanosta-8,24-dien-26-oic acid)                        |
| 142 | Lucialdehyde E (7 $\beta$ , 15 $\alpha$ -dihydroxy-3,11-dioxo-5 $\alpha$ -lanosta-8,24-dien-26-al)                                   |
| 143 | Ganolucidic acid D                                                                                                                   |
| 144 | Ganoderic acid W                                                                                                                     |
| 145 | Ganoderic acid Mb (3 $\alpha$ , 15 $\alpha$ , 22-triacetoxy-7 $\alpha$ -hydroxy-5 $\alpha$ -lanost-8,24E-dien-26-oic acid)           |
| 146 | Ganoderic acid Mc (3 $\alpha$ , 7 $\alpha$ , 22-triacetoxy-15 $\alpha$ -hydroxy-5 $\alpha$ -lanost-8,24E-dien-26-oic acid)           |
| 147 | Ganoderic acid Md (3 $\alpha$ , 22-diacetoxy-7 $\alpha$ -methoxy-5 $\alpha$ -lanost-8,24E-dien-26-oic acid)                          |



|     |                                                                                                                                                        |
|-----|--------------------------------------------------------------------------------------------------------------------------------------------------------|
| 148 | Ganoderic acid Mg (3 $\alpha$ , 22-diacetoxy-15 $\alpha$ -hydroxy-7 $\alpha$ -methoxy-5 $\alpha$ -lanost-8,24 $E$ -dien-26-oic acid)                   |
| 149 | Ganoderic acid Mh (3 $\alpha$ , 22-diacetoxy-7 $\alpha$ , 15 $\alpha$ -dihydroxy-5 $\alpha$ -lanost-8,24 $E$ -dien-26-oic acid)                        |
| 150 | Ganoderic acid Mj (22-acetoxy-3 $\alpha$ -hydroxy-7 $\alpha$ -methoxy-5 $\alpha$ -lanost-8,24 $E$ -dien-26-oic acid)                                   |
| 151 | 3 $\alpha$ , 22 $\beta$ -Diacetoxy-7 $\alpha$ -hydroxyl-5 $\alpha$ -lanost-8,24 $E$ -dien-26-oic acid                                                  |
| 152 | Ganorbiformin B                                                                                                                                        |
| 153 | Ganorbiformin C                                                                                                                                        |
| 154 | Ganorbiformin D                                                                                                                                        |
| 155 | Ganorbiformin E                                                                                                                                        |
| 156 | Ganorbiformin F                                                                                                                                        |
| 157 | Ganoderic acid O ((22 $S$ , 24 $E$ )-3 $\alpha$ , 15 $\alpha$ , 22-triacetoxy-7 $\alpha$ -hydroxy-5 $\alpha$ -lanosta-7,24-dien-26-oic acid)           |
| 158 | 7-O-Methylganoderic acid O ((22 $S$ , 24 $E$ )-3 $\alpha$ , 15 $\alpha$ , 22-triacetoxy-7 $\alpha$ -methoxy-5 $\alpha$ -lanosta-8,24-dien-26-oic acid) |
| 159 | (22 $S$ ,24 $E$ )-15 $\alpha$ ,22-Diacetoxy-3-oxolanosta-8,24-dien-26-oic acid                                                                         |
| 160 | (22 $S$ ,24 $E$ )-3 $\beta$ ,15 $\alpha$ ,22-Triacetoxylanosta-8,24-dien-26-oic acid                                                                   |
| 161 | (22 $S$ ,24 $E$ )-15 $\alpha$ ,22-Diacetoxy-3 $\beta$ -hydroxylanosta-8,24-dien-26-oic acid                                                            |
| 162 | (24 $E$ )-15 $\alpha$ -hydroxy-3-oxolanosta-8,24-dien-26-oic acid.                                                                                     |
| 163 | (24 $E$ )-7 $\alpha$ ,15 $\alpha$ -dihydroxy-3-oxolanosta-8,24-dien-26-oic acid.                                                                       |
| 164 | (24 $E$ )-3 $\beta$ -Acetoxy-7 $\alpha$ -hydroxylanosta-8,24-dien-26-oic acid                                                                          |
| 165 | (24 $E$ )-3 $\beta$ ,15 $\alpha$ -Diacetoxy-7 $\alpha$ -hydroxylanosta-8,24-dien-26-oic acid                                                           |
| 166 | (22 $S$ ,24 $E$ )-7 $\alpha$ -Hydroxy-3 $\beta$ ,15 $\alpha$ ,22-triacetoxylanosta-8,24-dien-26-oic acid                                               |
| 167 | Leucocontextin W                                                                                                                                       |
| 168 | Ganoleucoin Y                                                                                                                                          |
| 169 | Ganoleucoin Z                                                                                                                                          |
| 170 | Hainanaldehyde A                                                                                                                                       |
| 171 | Sinensoic acid (3,26-dihydroxy-5 $\alpha$ -lanosta-8,24 $E$ -dien-21-oic acid)                                                                         |
| 172 | Tsugaroside B (3 $\alpha$ -acetoxy-5 $\alpha$ -lanosta-8,24-diene-21-O- $\beta$ -D-xyloside)                                                           |
| 173 | Tsugaric acid A (3 $\alpha$ -acetoxy-5 $\alpha$ -lanosta-8,24-dien-21-oic acid)                                                                        |
| 174 | Ganosinoside A (3-oxo-5 $\alpha$ -lanosta-8,24-dien-21-oic acid ester $\beta$ -D-glucoside)                                                            |
| 175 | Tsugaroside A (3 $\alpha$ -acetoxy-5 $\alpha$ -lanosta-8,24-dien-21-oic acid ester $\beta$ -D-glucoside)                                               |
| 176 | 3-Oxo-5 $\alpha$ -lanosta-8,24-dien-21-oic acid                                                                                                        |
| 177 | 3 $\beta$ -Hydroxy-5 $\alpha$ -lanosta-8,24-dien-21-oic acid                                                                                           |
| 178 | Leucocontextins A                                                                                                                                      |
| 179 | Leucocontextins B                                                                                                                                      |
| 180 | Leucocontextins C                                                                                                                                      |
| 181 | Leucocontextins D                                                                                                                                      |
| 182 | Leucocontextins J                                                                                                                                      |



|     |                                                                                                  |
|-----|--------------------------------------------------------------------------------------------------|
| 183 | Leucocontextins K                                                                                |
| 184 | Leucocontextins L                                                                                |
| 185 | Leucocontextins M                                                                                |
| 186 | Leucocontextins N                                                                                |
| 187 | Leucocontextins R                                                                                |
| 188 | Leucocontextins E                                                                                |
| 189 | Leucocontextins H                                                                                |
| 190 | Leucocontextins F                                                                                |
| 191 | Leucocontextins G                                                                                |
| 192 | Leucocontextins I                                                                                |
| 193 | Leucocontextins Q                                                                                |
| 194 | (24Z)-3-oxo-7 $\alpha$ ,15 $\alpha$ ,27-trihydroxylanosta-8,24-diene.                            |
| 195 | 3-oxo-7 $\alpha$ ,15 $\alpha$ ,26,27-tetrahydroxylanosta-8,24-diene.                             |
| 196 | Hainanic acid A                                                                                  |
| 197 | Hainanic acid B                                                                                  |
| 198 | Ganodrol A                                                                                       |
| 199 | 21-hydroxy-3,7-dioxo-8,24E-dien-5 $\alpha$ -lanosta-26-ol                                        |
| 200 | (20S,24E)-21-chloro-15 $\beta$ ,20,29-trihydroxy-3,7,11-trioxolanosta-8,24-dien-26-oic acid.     |
| 201 | (20S,24E)-15 $\beta$ ,20,29-trihydroxy-3,7,11-trioxolanosta-8,24-dien-26-oic acid.               |
| 202 | (20S,24E)-15 $\beta$ ,20-dihydroxy-3,7,11-trioxolanosta-8,24-dien-26-oic acid                    |
| 203 | (20S,24E)-7,11-dioxo-3 $\beta$ ,15 $\beta$ ,20,29-tetrahydroxylanosta-8,24-dien-26-oic acid      |
| 204 | Ganoderiol E (3 $\beta$ ,26,27-trihydroxy-5 $\alpha$ -lanosta-8,24-dien-7-one)                   |
| 205 | Ganoderiol I (15 $\alpha$ ,26,27-trihydroxy-5 $\alpha$ -lanosta-8,24-dien-3-one)                 |
| 206 | Ganoderiol J (26,27-dihydroxy-5 $\alpha$ -lanosta-8,24-dien-3,7-dione)                           |
| 207 | 3 $\beta$ ,15 $\alpha$ -Diacetoxylanosta-8,24-dien-26-oic acid                                   |
| 208 | Ganoderic acid U5                                                                                |
| 209 | Ganoderic acid U6                                                                                |
| 210 | (22S,24E)-22-acetoxy-3,7-dioxolanosta-8,24-dien-26-oic acid                                      |
| 211 | (22S,24E)-3 $\alpha$ ,22-diacetoxy-7-oxolanosta-8,24-dien-26-oic acid                            |
| 212 | 3 $\alpha$ -acetoxy-5 $\alpha$ -lanosta-8,24(24')-dien-21-oic acid                               |
| 213 | (24E)-7 $\alpha$ -acetoxy-15 $\alpha$ -hydroxy-3-oxolanosta-8,24-dien-26-oic acid                |
| 214 | Colossolactone A                                                                                 |
| 215 | Ganocolossusins H                                                                                |
| 216 | Ganoderic acid U4                                                                                |
| 217 | 3b,7b-dihydroxy-11-oxo-8,24E-dien-5 $\alpha$ -lanosta-26-ol                                      |
| 218 | (24Z)-7 $\alpha$ -hydroxy-3-oxo-lanosta-8,24-dien-26-oic acid                                    |
| 219 | (24E)-7 $\alpha$ -Methoxy-3-oxolanosta-8,24-dien-26-oic acid                                     |
| 220 | (22S,24E)-3 $\beta$ ,22-Diacetoxy-7 $\alpha$ -methoxylanosta-8,24-dien-26-oic acid               |
| 221 | (22S,24E)-7 $\alpha$ -Methoxy-3 $\beta$ ,15 $\alpha$ ,22-triacetoxylanosta-8,24-dien-26-oic acid |



|     |                                                                                                                                     |
|-----|-------------------------------------------------------------------------------------------------------------------------------------|
| 222 | (24 <i>E</i> )-3 $\beta$ -Acetoxy-15 $\alpha$ -hydroxy-7 $\alpha$ -methoxylanosta-8,24-dien-26-oic acid                             |
| 223 | (24 <i>S</i> )-7 $\alpha$ ,24-dihydroxy-3-oxo-lanosta-8,25-diene,                                                                   |
| 224 | (24 <i>S</i> )-3,7-dioxo-24-hydroxylanosta-8,25-diene                                                                               |
| 225 | (24 <i>S</i> )-24-hydroxy-3-oxo-lanosta-7,9(11),25-triene                                                                           |
| 226 | (24 <i>S</i> )-3 $\beta$ ,24-dihydroxylanosta-7,9(11),25-triene                                                                     |
| 227 | Tsugaric acid C ((24 <i>R,S</i> )-3 $\alpha$ -acetoxy-24-hydroxy-5 $\alpha$ -lanosta-8,25-dien-21-oic acid)                         |
| 228 | 3 $\beta$ -hydroxy-7,22-dioxo-5 $\alpha$ -lanosta-8,24-dien-21-oic acid                                                             |
| 229 | Applanaic acid B                                                                                                                    |
| 230 | (17 <i>Z</i> )-3 $\beta$ ,7 $\beta$ ,15 $\beta$ -Trihydroxy-11,23-dioxolanost-8,17(20)-dien-26-oate                                 |
| 231 | Ganoderoid D                                                                                                                        |
| 232 | Tsugaric acid B (3 $\alpha$ -acetoxy-16 $\alpha$ -hydroxy-24 $\xi$ -methyl-5 $\alpha$ -lanosta-8,25-dien-21-oic acid)               |
| 233 | 3-Epipachymic acid (3 $\alpha$ -acetoxy-16 $\alpha$ -hydroxy-24-methylene-5 $\alpha$ -lanost-8-en-21-oic acid)                      |
| 235 | Epoxyganoderiol A (24 <i>S</i> , 25 <i>S</i> -epoxy-7 $\alpha$ , 26-dihydroxy-5 $\alpha$ -lanost-8-en-3-one)                        |
| 236 | Ganoderone C (5 $\alpha$ -lanosta-8-ene-24,25-epoxy-26-hydroxy-3,7-dione)                                                           |
| 237 | Colossolactone B                                                                                                                    |
| 238 | Ganodermalactones X                                                                                                                 |
| 239 | Colossolactone I ((22 <i>S</i> )-3 $\beta$ -hydroxylanosta-8,24-dien-26,22-olide)                                                   |
| 240 | Colossolactone II ((22 <i>S</i> )-1,3- $\beta$ -dihydroxylanosta-8,24-dien-26,22-olide)                                             |
| 241 | Offiffifficimalonic acid L                                                                                                          |
| 242 | Offiffifficimalonic acid M                                                                                                          |
| 243 | Offiffifficimalonic acid N                                                                                                          |
| 244 | Offiffifficimalonic acid O                                                                                                          |
| 245 | Spiroganocalitone A                                                                                                                 |
| 246 | Spiroganocalitone B                                                                                                                 |
| 247 | Spiroganocalitone C                                                                                                                 |
| 248 | Spiroganocalitone D                                                                                                                 |
| 249 | Ganotropic Acid                                                                                                                     |
| 250 | (24 <i>E</i> )-20,21-epoxy-15 $\beta$ -hydroxy-3,7,11-trioxolanosta-8,24-dien-26-oic acid.                                          |
| 251 | Applanaic acids C                                                                                                                   |
| 252 | Furanoganoderic acid (21,23-epoxy-15 $\alpha$ -hydroxy-3,7,11-trioxo-5 $\alpha$ -lanosta-8,20(21),22-trien-26-oic acid)             |
| 253 | Ganodermacetal (methyl 7 $\beta$ , 15 $\alpha$ -isopropylidenedioxy-3 $\beta$ -hydroxy-11,23-dioxo-5 $\alpha$ -lanost-8-en-26-oate) |
| 254 | Methyl ganoderate A acetamide (methyl 7 $\beta$ , 15 $\alpha$ -isopropylidenedioxy-3,11,23-trioxo-5 $\alpha$ -lanost-8-en-26-oate)  |
| 255 | Leucocontextin V                                                                                                                    |
| 256 | Austrolactone (I)                                                                                                                   |



|     |                                                                                                                                     |
|-----|-------------------------------------------------------------------------------------------------------------------------------------|
| 257 | Ganodermalactones W                                                                                                                 |
| 258 | Colossolactone III ((22S)-3 $\beta$ , 19-epoxy-lanosta-8,24-dien-26,22-olide)                                                       |
| 259 | Butyl lucidenate N                                                                                                                  |
| 260 | Butyl lucidenate A                                                                                                                  |
|     | 20(21)-Dehydro lucidenic acid N                                                                                                     |
| 261 | (3 $\beta$ , 7 $\beta$ -dihydroxy-11,15-dioxo-25,26,27-trinorlanosta-8,20-dien-24-oic acid)                                         |
|     | 20-Hydroxylucidenic acid A                                                                                                          |
| 262 | (7 $\beta$ , 20 $\xi$ -dihydroxy-3,11,15-trioxo-25,26,27-trinorlanost-8-en-24-oic acid)                                             |
|     | Methyl lucidenate D                                                                                                                 |
| 263 | (methyl 12 $\beta$ -acetoxy-3,7,11,15-tetraoxo-5 $\alpha$ -lanost-8-en-24-oate)                                                     |
|     | 20(21)-Dehydro lucidenic acid A                                                                                                     |
| 264 | (7 $\beta$ -Hydroxy-3,11,15-trioxo-25,26,27-trisnorlanosta-8,20(21)-dien-24-oic acid)                                               |
|     | Methyl 20(21)-dehydro lucidenate A                                                                                                  |
| 265 | (methyl 7 $\beta$ -hydroxy-3,11,15-trioxo-25,26,27-trisnorlanosta-8,20(21)-dien-24-oate)                                            |
|     | Lucidenic acid N                                                                                                                    |
| 266 | (3,7-dihydroxy-4,4,14-trimethyl-11,15-dioxo-5 $\alpha$ -chol-8-en-24-oic acid)                                                      |
|     | Lucidenic acid D                                                                                                                    |
| 267 | (12 $\beta$ -acetoxy-4,4,14 $\alpha$ -trimethyl-3,7,11,15-tetraoxo-5 $\alpha$ -chol-8-en-24-oic acid)                               |
| 268 | Methyl lucidenate E                                                                                                                 |
| 269 | Methyl lucidenate F                                                                                                                 |
|     | Ethyl lucidenates A                                                                                                                 |
| 270 | (ethyl 7 $\beta$ -hydroxy-4,4,14 $\alpha$ -trimethyl-3,11,15-trioxo-5 $\alpha$ -chol-8-en-24-oate)                                  |
|     | 3 $\beta$ -Oxo-formyl-7 $\beta$ , 12 $\beta$ -dihydroxy-4,4,14 $\alpha$ -trimethyl-5 $\alpha$ -chol-11,15-dioxo-8-en(E)-24-oic acid |
| 271 | Lucidenic acid A                                                                                                                    |
| 272 | 273(7 $\beta$ -hydroxy-4,4,14 $\alpha$ -trimethyl-3,11,15-trioxo-5 $\alpha$ -chol-8-en-24-oic acid)                                 |
|     | Lucidenic acid B                                                                                                                    |
| 273 | (7 $\beta$ , 12-dihydroxy-4,4,14 $\alpha$ -trimethyl-3,11,15-trioxo-5 $\alpha$ -chol-8-en-24-oic acid)                              |
|     | Lucidenic acid C                                                                                                                    |
| 274 | (3 $\beta$ , 7 $\beta$ , 12-trihydroxy-4,4,14 $\alpha$ -trimethyl-11,15-dioxo-5 $\alpha$ -chol-8-en-24-oic acid)                    |
| 275 | 4,4,14 $\alpha$ -Trimethyl-3,7-dioxo-5 $\alpha$ -chol-8-en-24-oic acid                                                              |
|     | (3 $\beta$ , 7 $\beta$ -dihydroxy-12 $\beta$ -acetoxy-25,26,27-trinor-11,15-dioxo dioxolanost-8-en-24-oic acid)                     |
| 276 |                                                                                                                                     |
| 277 | Methyl lucidenate P                                                                                                                 |
|     | Methyl lucidenate Q (methyl-7 $\beta$ ,                                                                                             |
| 278 | 15 $\alpha$ -dihydroxy-25,26,27-trinor-3,11-dioxolanost-8-en-24-oate)                                                               |
| 279 | 3 $\beta$ -Hydroxy-4,4,14-trimethyl-7,11,15-trioxochol-8-en-24-oic acid                                                             |
| 280 | Methyl lucidenate D2                                                                                                                |
| 281 | Methyl lucidenate E2                                                                                                                |
|     | Methyl lucidenate N (methyl 3 $\beta$ , 7 $\beta$ -dihydroxy-4,4,14 $\alpha$ -trimethyl-11,15-dioxo-5 $\alpha$ -chol-8-en-24-oate)  |
| 282 |                                                                                                                                     |



|     |                                                                                                                                                                     |
|-----|---------------------------------------------------------------------------------------------------------------------------------------------------------------------|
| 283 | t-Butyl lucidenate B (t-butyl 7 $\beta$ , 12 $\beta$ -dihydroxy-4,4,14 $\alpha$ -trimethyl-3,11,15-trioxo-5 $\alpha$ -chol-8-en-24-oate)                            |
| 284 | Methyl lucidenate A                                                                                                                                                 |
| 285 | Lucidenic acid D2                                                                                                                                                   |
| 286 | 20-Hydroxylucidenic acid D 2 ((20 $\xi$ )-12 $\beta$ -acetoxy-20-hydroxy-3,7,11,15-tetraoxo-25,26,27-trisnorlanost-8-en-24-oic acid)                                |
| 287 | 20-Hydroxylucidenic acid F ((20 $\xi$ )-20-hydroxy-3,7,11,15-tetraoxo-25,26,27-trisnorlanost-8-en-24-oic acid)                                                      |
| 288 | 20-Hydroxylucidenic acid E 2 (12 $\beta$ -acetoxy-3 $\beta$ -hydroxy-7,11,15-trioxo-25,26,27-trisnorlanost-8-en-24-oic acid)                                        |
| 289 | 20-Hydroxylucidenic acid N ((20 $\xi$ )-3 $\beta$ , 7 $\beta$ , 20-trihydroxy-11,15-dioxo-25,26,27-trisnorlanost-8-en-24-oic acid)                                  |
| 290 | 20-Hydroxylucidenic acid P ((20 $\xi$ )-12 $\beta$ -acetoxy-3 $\beta$ , 7 $\beta$ , 20-trihydroxy-11,15-dioxo-25,26,27-trisnorlanost-8-en-24-oic acid)              |
| 291 | Lucidenic acid F                                                                                                                                                    |
| 292 | Methyl lucidenate C                                                                                                                                                 |
| 293 | Lucidenic acid E2                                                                                                                                                   |
| 294 | Lucideric acid A                                                                                                                                                    |
| 295 | Methyl lucidenate H (methyl 3 $\beta$ , 7 $\beta$ -dihydroxy-4 $\alpha$ -hydroxymethyl-4 $\beta$ , 14 $\alpha$ -dimethyl-11,15-dioxo-5 $\alpha$ -chol-8-en-24-oate) |
| 296 | Methyl lucidenate I (3 $\beta$ -hydroxy-4 $\alpha$ -hydroxymethyl-4 $\beta$ , 14 $\alpha$ -dimethyl-7,11,15-trioxo-5 $\alpha$ -chol-8-en-24-oate)                   |
| 297 | Methyl lucidenate J (3 $\beta$ , 12 $\beta$ -dihydroxy-4 $\alpha$ -hydroxymethyl-4 $\beta$ , 14 $\alpha$ -dimethyl-7,11,15-trioxo-5 $\alpha$ -chol-8-en-24-oate)    |
| 298 | Methyl lucidenate Ha                                                                                                                                                |
| 299 | Ganoderoid C                                                                                                                                                        |
| 300 | Lucidone A                                                                                                                                                          |
| 301 | Lucidenol                                                                                                                                                           |
| 302 | Ganosineniol A                                                                                                                                                      |
| 303 | Ganolucidoid A.                                                                                                                                                     |
| 304 | Ganolucidoid B                                                                                                                                                      |
| 305 | 3 $\beta$ -acetyloxy-lucidone H                                                                                                                                     |
| 306 | Ganoluciduone A                                                                                                                                                     |
| 307 | Ganosporelactone A                                                                                                                                                  |
| 308 | Ganosporelactone B                                                                                                                                                  |
| 309 | Ganolactone (7 $\beta$ -hydroxy-3,11,15-trioxo-lanosta-8-en-24 $\rightarrow$ 20 $\alpha$ -lactone)                                                                  |
| 310 | Ganoderlactone B                                                                                                                                                    |
| 311 | Ganoderlactone C                                                                                                                                                    |
| 312 | Ganoderlactone D                                                                                                                                                    |
| 313 | Ganoderlactone E                                                                                                                                                    |



|     |                                                                                                                         |
|-----|-------------------------------------------------------------------------------------------------------------------------|
| 314 | Ganolactone B (3 $\beta$ , 7 $\beta$ -dihydroxy-11, 15-dioxolanosta-8-en-24 $\rightarrow$ 20 lactone)                   |
| 315 | 8 $\alpha$ , 9 $\alpha$ -Epoxy-4,4,14 $\alpha$ -trimethyl-3,7,11,15,20-pentaoxo-5 $\alpha$ -pregnane                    |
| 316 | 3 $\beta$ , 7 $\beta$ -Dihydroxy-11,15,23-trioxolanost-8,16-dien-26-oic acid                                            |
| 317 | 3 $\beta$ , 7 $\beta$ -Dihydroxy-11,15,23-trioxolanost-8,16-dien-26-oic acid methyl ester                               |
| 318 | 12 $\beta$ -Acetoxy-3 $\beta$ , 7 $\beta$ -dihydroxy-11, 15,23-trioxolanost-8,16-dien-26-oic acid                       |
| 319 | 20-carbinol-7 $\beta$ ,15 $\alpha$ -dihydroxy-4,4,14 $\alpha$ -trimethyl-3,11-dioxo-5 $\alpha$ -pregn-8,16-dien         |
| 320 | Ganoderol A                                                                                                             |
| 321 | Ganoderol A                                                                                                             |
| 322 | 15-Hydroxy-ganoderic acid S<br>(15 $\alpha$ -hydroxy-3-oxo-5 $\alpha$ -lanosta-7,9(11),24(E)-trien-26-oic acid)         |
| 323 | 3 $\alpha$ , 16 $\alpha$ -Dihydroxylanosta-7,9(11),24-trien-21-oic acid                                                 |
| 324 | 3 $\alpha$ , 16 $\alpha$ , 26-Trihydroxylanosta-7,9(11),24-trien-21-oic acid                                            |
| 325 | Ganoderic acid S1                                                                                                       |
| 326 | Ganoderic acid SZ (3-oxo-lanosta-7,9(11),24(Z)-trien-26-oic acid)                                                       |
| 327 | 5 $\alpha$ -Lanosta-7,9(11),24-triene-15 $\alpha$ -26-dihydroxy-3-one                                                   |
| 328 | Ganoderic acid Me (3 $\alpha$ , 15 $\alpha$ -diacetoxy-5 $\alpha$ -lanost-7,9(11),24E-trien-26-oic acid)                |
| 329 | Ganoderic acid Mf<br>(3 $\alpha$ -acetoxy-15 $\alpha$ -hydroxy-5 $\alpha$ -lanost-7,9(11),24E-trien-26-oic acid)        |
| 330 | Ganodermenonol (26-hydroxy-5 $\alpha$ -lanosta-7,9(11),24-trien-3-one)                                                  |
| 331 | Ganodermediol (5 $\alpha$ -lanosta-7,9(11),24-triene-3 $\beta$ , 26-diol)                                               |
| 332 | Ganoderetriol (5 $\alpha$ -lanosta-7,9(11),24-triene-3 $\beta$ , 26,27-triol)                                           |
| 333 | Ganodermic acid S (lanosta-7,9(11),24-trien-3 $\beta$ , 15 $\alpha$ -diacetoxy-26-oic acid)                             |
| 334 | Carnosodione (26,27-dihydroxylanosta-7,9(11),24-trien-3,16-dione)                                                       |
| 335 | Canoderol B ((24E)-5 $\alpha$ -lanosta-7,9(11),24-trien-3,26-diol)                                                      |
| 336 | Ganoderic acid Mk (3 $\alpha$ , 22-diacetoxy-15 $\alpha$ -hydroxy-5 $\alpha$ -lanost-7,9(11),24E-trien-26-oic acid)     |
| 337 | Ganoderiol B (15 $\alpha$ , 26,27-trihydroxy-5 $\alpha$ -lanosta-7,9(11),24-trien-3-one)                                |
| 338 | Ganoderic acid T ((22S, 24E)-3 $\alpha$ , 15 $\alpha$ , 22-triacetoxy-5 $\alpha$ -lanosta-7,9(11),24-trien-26-oic acid) |
| 339 | Ganoderic acid S ((22S, 24E)-22-acetoxy-3 $\alpha$ -hydroxy-5 $\alpha$ -lanosta-7,9(11),24-trien-26-oic acid)           |
| 340 | Ganoderic acid R ((22S, 24E)-3 $\alpha$ , 22-diacetoxy-5 $\alpha$ -lanosta-7,9(11),24-trien-26-oic acid)                |
| 341 | Ganorbiformin G                                                                                                         |
| 342 | Lanosta-7,9(11),24-trien-3 $\beta$ , 15 $\alpha$ , 22 $\beta$ -triacetoxy-26-oic acid                                   |
| 343 | Lanosta-7,9(11),24-trien-15 $\alpha$ -acetoxy-3 $\alpha$ -hydroxy-23-oxo-26-oic acid                                    |
| 344 | Lanosta-7,9(11),24-trien-3 $\alpha$ , 15 $\alpha$ -diacetoxy-23-oxo-26-oic acid                                         |
| 345 | Lanosta-7,9(11),24-trien-3 $\alpha$ , 15 $\alpha$ -hydroxy-23-oxo-26-oic acid                                           |
| 346 | Lanosta-7,9(11),24-trien-3 $\alpha$ -acetoxy-15 $\alpha$ , 22 $\beta$ -dihydroxy-26-oic acid                            |
| 347 | Ganodermic acid T-N (3 $\beta$ -hydroxy-15 $\alpha$ -acetoxy-lanosta-7,9(11),24-trien-26-oic acid)                      |



|     |                                                                                                                                                 |
|-----|-------------------------------------------------------------------------------------------------------------------------------------------------|
| 348 | Ganodermic acid T-O (3 $\beta$ -acetoxy-15 $\alpha$ -hydroxy-lanosta-7,9(11),24-trien-26-oic acid)                                              |
| 349 | Ganodermic acid T-Q (3 $\beta$ -oxo-15 $\alpha$ -acetoxy-lanosta-7,9(11),24-trien-26-oic acid)                                                  |
| 350 | Compound 10                                                                                                                                     |
| 351 | Ganoderic acid P ((22 <i>S</i> , 24 <i>E</i> )-15 $\alpha$ , 22-diacetoxy-3 $\alpha$ -hydroxy-5 $\alpha$ -lanosta-7,9(11),24-trien-26-oic acid) |
| 352 | Ganoderic acid Q ((22 <i>S</i> , 24 <i>E</i> )-3 $\alpha$ , 22-diacetoxy-15 $\alpha$ -hydroxy-5 $\alpha$ -lanosta-7,9(11),24-trien-26-oic acid) |
| 353 | Ganoderic acid Jc (15 $\alpha$ , 23-dihydroxy-3-oxo-5 $\alpha$ -lanosta-7,9(11),24-trien-26-oic acid)                                           |
| 354 | Ganodermatetraol (3 $\beta$ , 15 $\alpha$ , 26,27-tetrahydroxy-5 $\alpha$ -lanosta-7,9(11),24-triene)                                           |
| 355 | Lucialdehyde A ((24 <i>E</i> )-3 $\beta$ -hydroxy-5 $\alpha$ -lanosta-7,9(11),24-trien-26-al)                                                   |
| 356 | Ganoderiol F (26,27-dihydroxy-5 $\alpha$ -lanosta-7,9(11),24-trien-3-one)                                                                       |
| 357 | 26,27-Dihydroxy-5 $\alpha$ -lanosta-7,9(11),24-triene-3,22-dione                                                                                |
| 358 | 26-Hydroxy-5 $\alpha$ -lanosta-7,9(11),24-triene-3,22-dione                                                                                     |
| 359 | Ganodermic acid P1 (lanosta-7,9(11),24-trien-3 $\alpha$ , 22 $\beta$ -diacetoxy-15 $\alpha$ -hydroxy-26-oic acid)                               |
| 360 | Ganodermic acid P 2 (lanosta-7,9(11),24-trien-15 $\alpha$ , 22 $\beta$ -diacetoxy-3 $\beta$ -hydroxy-26-oic acid)                               |
| 361 | Lanosta-7,9(11),24-trien-3 $\beta$ , 15 $\alpha$ , 22-triacetoxy-26-oic acid                                                                    |
| 362 | 16 $\alpha$ -Hydroxy-3-oxolanosta-7,9(11),24-trien-21-oic acid                                                                                  |
| 363 | (20 <i>S</i> ,24 <i>E</i> )-15 $\beta$ ,20-dihydroxy-3-oxolanosta-7,9(11),24-trien-26-oic acid.                                                 |
| 364 | Ganodaustalic acid D                                                                                                                            |
| 365 | 15 $\alpha$ -acetoxy-5 $\alpha$ -lanosta-7,9(11),24-trien-3 $\beta$ ,26-dio                                                                     |
| 366 | 3 $\beta$ -hydroxy-15 $\alpha$ -acetoxy-5 $\alpha$ -lanosta-7,9(11),24-trien-26-al                                                              |
| 367 | 3 $\alpha$ , 15 $\alpha$ , 22 $\alpha$ -Trihydroxylanosta-7,9(11),24-trien-26-oic acid                                                          |
| 368 | 3 $\beta$ , 15 $\alpha$ , 22 $\beta$ -Trihydroxylanosta-7,9(11),24-trien-26-oic acid                                                            |
| 369 | 3 $\alpha$ , 15 $\alpha$ -Diacetoxy-22 $\alpha$ -hydroxylanosta-7,9(11),24-trien-26-oic acid                                                    |
| 370 | 3 $\beta$ , 15 $\alpha$ -Diacetoxy-22 $\alpha$ -hydroxylanosta-7,9(11),24-trien-26-oic acid                                                     |
| 371 | 22 $\beta$ -Acetoxy-3 $\alpha$ , 15 $\alpha$ -dihydroxylanosta-7,9(11),24-trien-26-oic acid                                                     |
| 372 | 22 $\beta$ -Acetoxy-3 $\beta$ , 15 $\alpha$ -dihydroxylanosta-7,9(11),24-trien-26-oic acid                                                      |
| 373 | Ganoderic acid TR                                                                                                                               |
| 374 | Ganodermic acid Ja (lanosta-7,9(11),24-trien-3 $\alpha$ , 15 $\alpha$ -dihydroxy-26-oic acid)                                                   |
| 375 | Ganodermic acid Jb (lanosta-7,9(11),24-trien-3 $\beta$ , 15 $\alpha$ -dihydroxy-26-oic acid)                                                    |
| 376 | Ganodermic acid R (lanosta-7,9(11),24-trien-3 $\alpha$ , 15 $\alpha$ -diacetoxy-26-oic acid)                                                    |
| 377 | Ganoderic acid U1                                                                                                                               |
| 378 | 15 $\alpha$ , 26-Dihydroxy-5 $\alpha$ -lanosta-7,9,24( <i>E</i> )-trien-3-one                                                                   |
| 379 | 3 $\beta$ -Hydroxy-5 $\alpha$ -lanosta-7,9,24( <i>E</i> )-trien-26-oic acid                                                                     |
| 380 | (24 <i>E</i> )-3 $\beta$ -Acetoxylanosta-7,9(11),24-trien-26-oic acid                                                                           |



---

|     |                                                                                                                                                                         |
|-----|-------------------------------------------------------------------------------------------------------------------------------------------------------------------------|
| 381 | (22 <i>S</i> ,24 <i>E</i> )-3 $\beta$ ,22-Diacetoxylanosta-7,9(11),24-trien-26-oic acid (15)                                                                            |
| 382 | (22 <i>S</i> ,24 <i>E</i> )-22-Acetoxy-3 $\beta$ -hydroxylanosta-7,9(11),24-trien-26-oic acid                                                                           |
| 383 | Ganodaustalic acid G                                                                                                                                                    |
| 384 | Ganodaustalic acid F                                                                                                                                                    |
| 385 | Ganodrol B                                                                                                                                                              |
| 386 | 3-oxo-25-methoxy-24,26-dihydroxy-lanosta-7,9(11)-diene                                                                                                                  |
| 387 | Ganowebrianones B                                                                                                                                                       |
| 388 | (24 <i>S</i> ,25 <i>R</i> )-25-methoxylanosta-7,9(11)-dien-3 $\beta$ ,24,26-triol                                                                                       |
| 389 | Ganoderiol A triacetate (3 $\beta$ ,24,26-triacetoxy-5 $\alpha$ -lanosta-7,9(11)-dien-25-ol)                                                                            |
| 390 | Lucidumol B ((24 <i>S</i> )-lanosta-7,9(11)-diene-3 $\beta$ ,24,25-triol)                                                                                               |
| 391 | Ganodermanontriol (24,25,26-trihydroxy-5 $\alpha$ -lanosta-7,9(11)-dien-3-one)                                                                                          |
| 392 | Ganoderiol A (5 $\alpha$ -lanosta-7,9(11)-dien-3 $\beta$ ,24,25,26-tetraol)                                                                                             |
| 393 | Ganodermanondiol                                                                                                                                                        |
| 394 | Ganoderic acid X (3 $\alpha$ -hydroxy-15 $\alpha$ -acetoxy-lanosta-7,9(11),24-trien-26-oic acid)                                                                        |
| 395 | Ganosinensin A (ganodermanontriol 26-O-((2 <i>Z</i> ,5 <i>E</i> ,9 <i>E</i> )-2-[2-(2,5-dihydroxyphenyl)-2-oxo-ethylidene]-11-hydroxy-6,10-dimethylundeca-5,9-dienate)) |
| 396 | Ganosinensin B (ganodermanontriol 24-O-((2 <i>Z</i> ,5 <i>E</i> ,9 <i>E</i> )-2-[2-(2,5-dihydroxyphenyl)-2-oxo-ethylidene]-11-hydroxy-6,10-dimethylundeca-5,9-dienate)) |
| 397 | Ganosinensin C (ganodermanontriol 24-O-((2 <i>Z</i> ,5 <i>E</i> ,9 <i>E</i> )-2-[2-(2,5-dihydroxyphenyl)ethylidene]-11-hydroxy-6,10-dimethylundeca-5,9-dienate))        |
| 398 | Epoxyganoderiol B (24 <i>S</i> ,25 <i>S</i> -epoxy-26-hydroxy-5 $\alpha$ -lanosta-7,9(11)-diene-3-one)                                                                  |
| 399 | Epoxyganoderiol C (24 <i>S</i> ,25 <i>S</i> -epoxy-5 $\alpha$ -lanosta-7,9(11)-diene-3 $\beta$ ,26-diol)                                                                |
| 400 | 26,27-dihydroxy-24,25-epoxylanosta-7,9(11)-dien-3-one                                                                                                                   |
| 401 | Gibbosicolids C                                                                                                                                                         |
| 402 | Applanoxidic acid A (15 $\alpha$ -hydroxy-7 $\alpha$ ,8 $\alpha$ -epoxy-3,12,23-trioxo-5 $\alpha$ -lanosta-9(11),20 <i>E</i> -dien-26-oic acid)                         |
| 403 | Applanoxidic acid B (3 $\beta$ -hydroxy-7 $\alpha$ ,8 $\alpha$ -epoxy-12,15,23-trioxo-5 $\alpha$ -lanosta-9(11),20 <i>E</i> -dien-26-oic acid)                          |
| 404 | Applanoxidic acid F (7 $\alpha$ ,8 $\alpha$ -epoxy-3,12,15,23-tetraoxo-5 $\alpha$ -lanosta-9(11),20 <i>E</i> -dien-26-oic acid)                                         |
| 405 | Applanoxidic acid C (20-hydroxy-7 $\alpha$ ,8 $\alpha$ -epoxy-3,12,15,23-tetraoxo-5 $\alpha$ -lanosta-9(11),16-dien-26-oic acid)                                        |
| 406 | Applanoxidic acid D (3 $\beta$ ,20-dihydroxy-7 $\alpha$ ,8 $\alpha$ -epoxy-12,15,23-trioxo-5 $\alpha$ -lanosta-9(11),16-dien-26-oic acid)                               |
| 407 | Applanolactone A                                                                                                                                                        |
| 408 | Applanolic acid F                                                                                                                                                       |
| 409 | Applanolic acid E                                                                                                                                                       |

---



---

|     |                                                                                                                                                  |
|-----|--------------------------------------------------------------------------------------------------------------------------------------------------|
| 410 | Lucialdehyde A ((24 <i>E</i> )-3 <i>β</i> -hydroxy-5 <i>α</i> -lanosta-7,9(11),24-trien-26-ol)                                                   |
| 411 | Ganoderol A                                                                                                                                      |
| 412 | Ganoderol A                                                                                                                                      |
| 413 | Ganoderic acid TR                                                                                                                                |
| 414 | Ganodermic acid Ja (lanosta-7,9(11),24-trien-3 <i>α</i> , 15 <i>α</i> -dihydroxy-26-oic acid)                                                    |
| 415 | Ganodermic acid Jb (lanosta-7,9(11),24-trien-3 <i>β</i> , 15 <i>α</i> -dihydroxy-26-oic acid)                                                    |
| 416 | Ganodermic acid R (lanosta-7,9(11),24-trien-3 <i>α</i> , 15 <i>α</i> -diacetoxy-26-oic acid)                                                     |
| 417 | 15 <i>α</i> -Hydroxy-3-oxo-5 <i>α</i> -lanosta-7,9,24( <i>E</i> )-triene-26-oic acid                                                             |
| 418 | 15 <i>α</i> , 26-Dihydroxy-5 <i>α</i> -lanosta-7,9,24( <i>E</i> )-trien-3-one                                                                    |
| 419 | 3 <i>β</i> -Hydroxy-5 <i>α</i> -lanosta-7,9,24( <i>E</i> )-trien-26-oic acid                                                                     |
| 420 | Ganodermenonol (26-hydroxy-5 <i>α</i> -lanosta-7,9(11),24-trien-3-one)                                                                           |
| 421 | Ganoluciduone B                                                                                                                                  |
| 422 | Lanosta-7,9(11),24-trien-3-one 15,26-dihydroxy                                                                                                   |
| 423 | Lanosta-7,9(11),24-trien-26-oic,3-hydroxy                                                                                                        |
| 424 | Ganoderic acid Y ((24 <i>E</i> )-3-ol-5 <i>α</i> -lanosta-7,9(11),24-trien-26-oic acid)                                                          |
| 425 | 4,4,14 <i>α</i> -Trimethyl-5 <i>α</i> -chole-7,9(11)-dien-3-oxo-24-oic acid                                                                      |
| 426 | Ganoderic acid Jd (15 <i>α</i> -hydroxy-3-oxo-5 <i>α</i> -lanosta-7,9(11)-dien-24-oic acid)                                                      |
| 427 | Applanone A                                                                                                                                      |
| 428 | Applanone B                                                                                                                                      |
| 429 | 16,17-dehydroapplanone E                                                                                                                         |
| 430 | Applanone D                                                                                                                                      |
| 431 | Applanone E                                                                                                                                      |
| 432 | Fornicatin C ((3 <i>β</i> )-3-hydroxy-18(13→12 <i>β</i> )-abeo-lanosta-13(17),24-dien-18-oic acid)                                               |
| 433 | Applanoxidic acid G (15 <i>β</i> , 20-dihydroxy-7 <i>α</i> , 8 <i>α</i> -epoxy-3,12,23-trioxo-5 <i>α</i> -lanosta-9(11),16-dien-26-oic acid)     |
| 434 | Applanoxidic acid H (3 <i>β</i> , 12 <i>α</i> , 20-trihydroxy-7 <i>α</i> , 8 <i>α</i> -epoxydioxo-5 <i>α</i> -lanosta-9(11),16-dien-26-oic acid) |
| 435 | Methyl applanate B                                                                                                                               |
| 436 | 8 <i>β</i> , 9 <i>α</i> -Dihydroganoderic acid J                                                                                                 |
| 437 | Methyl 8 <i>β</i> , 9 <i>α</i> -dihydroganoderate J                                                                                              |
| 438 | Ganosporic acid A (3,7,11,12,15,23-hexaoxo-5 <i>α</i> -lanosta-8-en-26-oic acid)                                                                 |
| 439 | 24 <i>ξ</i> -Methyl-5 <i>α</i> -lanosta-25-one                                                                                                   |
| 440 | 16 <i>α</i> ,20-dihydroxy-3,23-dioxo-5 <i>α</i> -lanosta-6,8-dien-26-oic acid                                                                    |
| 441 | Piptolinic acids F                                                                                                                               |
| 442 | Piptolinic acids I                                                                                                                               |
| 443 | Piptolinic acids G                                                                                                                               |
| 444 | Fornicatin C ((3 <i>β</i> )-3-hydroxy-18(13→12 <i>β</i> )-abeo-lanosta-13(17),24-dien-18-oic acid)                                               |
| 445 | Ganorbiformin A                                                                                                                                  |
| 446 | Gibbosic acid M                                                                                                                                  |

---



|     |                                                                                                                                                                                               |
|-----|-----------------------------------------------------------------------------------------------------------------------------------------------------------------------------------------------|
| 447 | Ganoderol X.                                                                                                                                                                                  |
| 448 | 8 $\beta$ , 9 $\alpha$ -Dihydroganoderic acid J                                                                                                                                               |
| 449 | Methyl 8 $\beta$ , 9 $\alpha$ -dihydroganoderate J                                                                                                                                            |
| 450 | Ganosporeric acid A (3,7,11,12,15,23-hexa-oxo-5 $\alpha$ -lanosta-8-en-26-oic acid)                                                                                                           |
| 451 | 24 $\xi$ -Methyl-5 $\alpha$ -lanosta-25-one                                                                                                                                                   |
| 452 | (20 <i>E</i> )-15 $\beta$ -Hydroxy-3,7,11,23-tetraoxolanost-20(22)-en-26-oate                                                                                                                 |
| 453 | (20 <i>E</i> )-15 $\beta$ -Hydroxy-3,7,11,23-tetraoxolanost-20(22)-en-26-oate                                                                                                                 |
| 454 | Fornicatins D                                                                                                                                                                                 |
| 455 | Fornicatins E                                                                                                                                                                                 |
| 456 | Fornicatins F                                                                                                                                                                                 |
| 457 | Fornicatin B (7 $\beta$ -hydroxy-11-oxo-3,4-seco-25,26,27-trinorlanosta-4(28),8-dien-3,24-dioic acid)                                                                                         |
| 458 | Fornicatin G (7 $\beta$ -hydroxy-11-oxo-3,4-seco-25,26,27-trinorlanosta-4(28),8-dien-24-oic-3-acetyl ester)                                                                                   |
| 459 | Fornicatin A (4,7 $\beta$ -epoxy-28-hydroxy-11-oxo-3,4-seco-25,26,27-trinorlanosta-8-en-3,24-dioic acid)                                                                                      |
| 460 | Fornicatin H (4,7 $\beta$ -epoxy-28-hydroxy-11-oxo-3,4-seco-25,26,27-trinorlanosta-8-en-3,24-diest er)                                                                                        |
| 461 | Australic acid ((20 <i>Z</i> , 23 <i>R</i> , 25 <i>R</i> )-15 $\alpha$ -acetyl-7 $\alpha$ , 8 $\alpha$ -epoxy-12-oxo-3,4-seco-5 $\alpha$ -lanosta-4(28),9,20(22)-trien-23,26-olid-3-oic acid) |
| 462 | Gibbosicolid E                                                                                                                                                                                |
| 463 | Gibbosicolid F                                                                                                                                                                                |
| 464 | Gibbosicolid G                                                                                                                                                                                |
| 465 | Cochlates A                                                                                                                                                                                   |
| 466 | Cochlates B                                                                                                                                                                                   |
| 467 | Colossolactone E                                                                                                                                                                              |
| 468 | Colossolactone F                                                                                                                                                                              |
| 469 | Colossolactone G                                                                                                                                                                              |
| 470 | Colossolactone G                                                                                                                                                                              |
| 471 | Colossolactone VIII ((22 <i>S</i> , 23 <i>R</i> )-A,B-dihomo-19-nor-15- $\beta$ -acetoxy-23-hydroxy-4-oxa-3-oxolanosta-1,8,19,24-tetraen-26,22-olide)                                         |
| 472 | Ganosinemic acid A                                                                                                                                                                            |
| 473 | Methyl ganosinensate A                                                                                                                                                                        |
| 475 | Ganocolossusins E                                                                                                                                                                             |
| 476 | Ganocolossusins F                                                                                                                                                                             |
| 477 | Gganorbifate H                                                                                                                                                                                |
| 478 | Ganorbifate F                                                                                                                                                                                 |



|     |                                                                                                                                                    |
|-----|----------------------------------------------------------------------------------------------------------------------------------------------------|
| 479 | Ganorbifate G                                                                                                                                      |
| 480 | Colossolactone VI ((22 <i>R</i> )-3,4- <i>seco</i> -19,22-diacetoxy-4-hydroxy lanosta-7,9(11),24( <i>Z</i> )-trien-3,26-dioic acid 3-methyl ester) |
| 481 | Colossolactone V ((22 <i>R</i> )-3,4- <i>seco</i> -19,22-diacetoxy-4-hydroxy lanosta-8,24( <i>Z</i> )-dien-3,26-dioic acid 3-methyl ester)         |
| 482 | Colossolactone VII ((22 <i>S</i> )-3,4- <i>seco</i> -19-acetoxy-4-hydroxy lanosta-8,24-3dien-26,22-olide 3-methyl ester)                           |
| 483 | Ganodermalactones U                                                                                                                                |
| 484 | Ganocolossusins D                                                                                                                                  |
| 485 | Ganorbifates A                                                                                                                                     |
| 486 | Ganorbifate C                                                                                                                                      |
| 487 | Ganorbifate D                                                                                                                                      |
| 488 | Ganorbifate E                                                                                                                                      |
| 489 | Ganorbifates B                                                                                                                                     |
| 490 | Ganorbifate I                                                                                                                                      |
| 491 | Colossolactone IV ((22 <i>S</i> )-A,B-dihomo-19-nor-4-oxalanosta-8,24-dien-26,22-olide)                                                            |
| 492 | Colossolactone C                                                                                                                                   |
| 493 | Ganocolossusins B                                                                                                                                  |
| 494 | Ganocolossusins C                                                                                                                                  |
| 495 | Ganodermalactones V                                                                                                                                |
| 496 | Ganocolossusins A                                                                                                                                  |
| 497 | Ganosidone A                                                                                                                                       |
| 498 | Ganosineamic acid B                                                                                                                                |

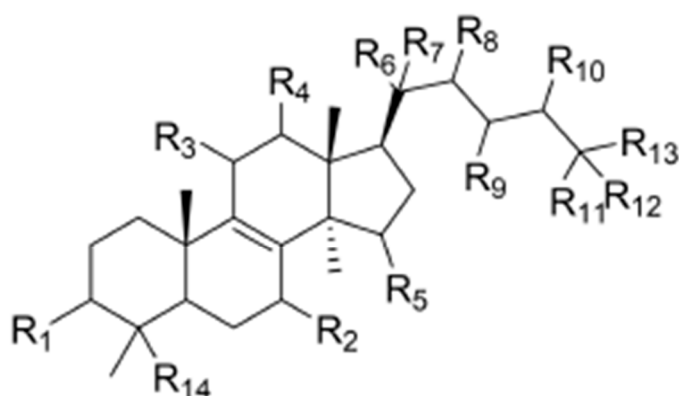

Figure S14 Chemical structure of compound 1-231



Table S14 Chemical Structures of compounds 1-231

| Cpd | R1            | R2           | R3          | R4            | R5                        | R6                        | R7          | R8 | R9        | R10 | R11                | R12 | R13             | R14                      |
|-----|---------------|--------------|-------------|---------------|---------------------------|---------------------------|-------------|----|-----------|-----|--------------------|-----|-----------------|--------------------------|
| 1   | $\beta$ -OH   | =O           | =O          | $\beta$ -O-Ac | =O                        | $\alpha$ -CH <sub>3</sub> | H           | H  | H         | H   | COOBu              | H   | CH <sub>3</sub> | $\beta$ -CH <sub>3</sub> |
| 2   | =O            | $\beta$ -OH  | =O          | H             | $\alpha$ -OH              | $\alpha$ -CH <sub>3</sub> | H           | H  | H         | H   | COOBu              | H   | CH <sub>3</sub> | $\beta$ -CH <sub>3</sub> |
| 3   | $\beta$ -OH   | $\beta$ -OH  | =O          | H             | =O                        | $\alpha$ -CH <sub>3</sub> | H           | H  | H         | H   | COOBu              | H   | CH <sub>3</sub> | $\beta$ -CH <sub>3</sub> |
| 4   | $\beta$ -OH   | =O           | =O          | $\beta$ -O-Ac | $\alpha$ -OH              | $\alpha$ -CH <sub>3</sub> | H           | H  | H         | H   | COOH               | H   | CH <sub>3</sub> | $\beta$ -CH <sub>3</sub> |
| 5   | =O            | H            | =O          | H             | $\alpha$ -OH              | $\beta$ -CH <sub>3</sub>  | H           | H  | H         | H   | COOH               | H   | CH <sub>3</sub> | $\beta$ -CH <sub>3</sub> |
| 6   | =O            | H            | =O          | H             | $\alpha$ -OH              | $\beta$ -CH <sub>3</sub>  | H           | H  | H         | H   | COOCH <sub>3</sub> | H   | CH <sub>3</sub> | $\beta$ -CH <sub>3</sub> |
| 7   | $\beta$ -OH   | H            | =O          | H             | $\alpha$ -OH              | $\beta$ -CH <sub>3</sub>  | H           | H  | H         | H   | COOH               | H   | CH <sub>3</sub> | $\beta$ -CH <sub>3</sub> |
| 8   | $\beta$ -OH   | H            | =O          | H             | $\alpha$ -OH              | $\beta$ -CH <sub>3</sub>  | H           | H  | H         | H   | COOCH <sub>3</sub> | H   | CH <sub>3</sub> | $\beta$ -CH <sub>3</sub> |
| 9   | =O            | $\beta$ -OH  | =O          | H             | $\alpha$ -OH              | $\beta$ -CH <sub>3</sub>  | H           | H  | H         | H   | COOH               | H   | CH <sub>3</sub> | $\beta$ -CH <sub>3</sub> |
| 10  | =O            | $\beta$ -OH  | =O          | H             | $\alpha$ -OH              | $\beta$ -CH <sub>3</sub>  | H           | H  | H         | H   | COOCH <sub>3</sub> | H   | CH <sub>3</sub> | $\beta$ -CH <sub>3</sub> |
| 11  | $\beta$ -OH   | $\beta$ -OH  | =O          | H             | =O                        | $\beta$ -CH <sub>3</sub>  | H           | H  | H         | H   | COOH               | H   | CH <sub>3</sub> | $\beta$ -CH <sub>3</sub> |
| 12  | $\beta$ -OH   | $\beta$ -OH  | =O          | H             | =O                        | $\beta$ -CH <sub>3</sub>  | H           | H  | H         | H   | COOCH <sub>3</sub> | H   | CH <sub>3</sub> | $\beta$ -CH <sub>3</sub> |
| 13  | $\beta$ -OH   | $\beta$ -OH  | =O          | H             | $\alpha$ -OH              | $\beta$ -CH <sub>3</sub>  | H           | H  | H         | H   | COOH               | H   | CH <sub>3</sub> | $\beta$ -CH <sub>3</sub> |
| 14  | $\beta$ -OH   | $\beta$ -OH  | =O          | H             | $\alpha$ -OH              | $\beta$ -CH <sub>3</sub>  | H           | H  | H         | H   | COOCH <sub>3</sub> | H   | CH <sub>3</sub> | $\beta$ -CH <sub>3</sub> |
| 15  | =O            | $\beta$ -OH  | =O          | H             | =O                        | $\beta$ -CH <sub>3</sub>  | H           | H  | H         | H   | COOH               | H   | CH <sub>3</sub> | $\beta$ -CH <sub>3</sub> |
| 16  | =O            | $\beta$ -OH  | =O          | H             | =O                        | $\beta$ -CH <sub>3</sub>  | H           | H  | H         | H   | COOCH <sub>3</sub> | H   | CH <sub>3</sub> | $\beta$ -CH <sub>3</sub> |
| 17  | $\beta$ -OH   | $\beta$ -OH  | =O          | H             | $\alpha$ -OH              | $\alpha$ -CH <sub>3</sub> | H           | H  | H         | H   | COOCH <sub>3</sub> | H   | CH <sub>3</sub> | $\beta$ -CH <sub>3</sub> |
| 18  | $\beta$ -OH   | =O           | H           | $\alpha$ -OH  | $\alpha$ -CH <sub>3</sub> | H                         | H           | H  | H         | H   | COOCH <sub>3</sub> | H   | CH <sub>3</sub> | $\beta$ -CH <sub>3</sub> |
| 19  | =O            | $\alpha$ -OH | =O          | H             | $\alpha$ -OH              | $\alpha$ -CH <sub>3</sub> | H           | H  | H         | H   | COOCH <sub>3</sub> | H   | CH <sub>3</sub> | $\beta$ -CH <sub>3</sub> |
| 20  | $\beta$ -OH   | $\alpha$ -OH | =O          | H             | $\alpha$ -OH              | $\alpha$ -CH <sub>3</sub> | H           | H  | H         | H   | COOCH <sub>3</sub> | H   | CH <sub>3</sub> | $\beta$ -CH <sub>3</sub> |
| 21  | O-CHO         | $\beta$ -OH  | =O          | $\beta$ -OH   | =O                        | $\beta$ -CH <sub>3</sub>  | H           | H  | H         | H   | COOH               | H   | CH <sub>3</sub> | $\beta$ -CH <sub>3</sub> |
| 22  | =O            | $\alpha$ -OH | =O          | H             | $\alpha$ -OH              | $\alpha$ -CH <sub>3</sub> | H           | H  | H         | H   | COOH               | H   | CH <sub>3</sub> | $\beta$ -CH <sub>3</sub> |
| 23  | =O            | $\beta$ -OH  | =O          | H             | =O                        | $\alpha$ -CH <sub>3</sub> | H           | H  | H         | H   | COOH               | H   | CH <sub>3</sub> | $\beta$ -CH <sub>3</sub> |
| 24  | =O            | =O           | =O          | $\beta$ -O-Ac | =O                        | $\alpha$ -CH <sub>3</sub> | H           | H  | H         | H   | COOEt              | H   | CH <sub>3</sub> | $\beta$ -CH <sub>3</sub> |
| 25  | $\beta$ -OH   | $\beta$ -OH  | =O          | $\beta$ -O-Ac | =O                        | $\alpha$ -CH <sub>3</sub> | H           | H  | H         | H   | COOCH <sub>3</sub> | H   | CH <sub>3</sub> | $\beta$ -CH <sub>3</sub> |
| 26  | $\beta$ -OH   | =O           | =O          | =O            | =O                        | $\alpha$ -CH <sub>3</sub> | H           | H  | H         | H   | COOH               | H   | CH <sub>3</sub> | $\beta$ -CH <sub>3</sub> |
| 27  | =O            | $\beta$ -OH  | $\beta$ -OH | H             | =O                        | $\alpha$ -CH <sub>3</sub> | H           | H  | H         | H   | COOH               | H   | CH <sub>3</sub> | $\beta$ -CH <sub>3</sub> |
| 28  | $\beta$ -OH   | =O           | =O          | $\beta$ -O-Ac | =O                        | $\beta$ -CH <sub>3</sub>  | H           | H  | H         | H   | COOH               | H   | CH <sub>3</sub> | $\beta$ -CH <sub>3</sub> |
| 29  | =O            | =O           | =O          | $\beta$ -O-Ac | =O                        | $\beta$ -CH <sub>3</sub>  | H           | H  | H         | H   | COOH               | H   | CH <sub>3</sub> | $\beta$ -CH <sub>3</sub> |
| 30  | =O            | =O           | =O          | H             | =O                        | $\beta$ -CH <sub>3</sub>  | H           | H  | H         | H   | COOH               | H   | CH <sub>3</sub> | $\beta$ -CH <sub>3</sub> |
| 31  | $\beta$ -OH   | $\beta$ -OH  | =O          | $\beta$ -O-Ac | =O                        | $\alpha$ -CH <sub>3</sub> | H           | H  | H         | H   | COOH               | H   | CH <sub>3</sub> | $\beta$ -CH <sub>3</sub> |
| 32  | $\beta$ -OH   | =O           | =O          | H             | =O                        | $\alpha$ -CH <sub>3</sub> | H           | H  | H         | H   | COOH               | H   | CH <sub>3</sub> | $\beta$ -CH <sub>3</sub> |
| 33  | =O            | =O           | =O          | H             | $\alpha$ -OH              | $\alpha$ -CH <sub>3</sub> | H           | H  | H         | H   | COOH               | H   | CH <sub>3</sub> | $\beta$ -CH <sub>3</sub> |
| 34  | $\beta$ -OH   | $\beta$ -OH  | =O          | H             | $\alpha$ -OH              | $\alpha$ -CH <sub>3</sub> | H           | H  | H         | H   | COOH               | H   | CH <sub>3</sub> | $\beta$ -CH <sub>3</sub> |
| 35  | $\beta$ -OH   | $\beta$ -OH  | =O          | $\beta$ -OH   | =O                        | $\beta$ -CH <sub>3</sub>  | H           | H  | H         | H   | COOH               | H   | CH <sub>3</sub> | $\beta$ -CH <sub>3</sub> |
| 36  | =O            | $\beta$ -OH  | =O          | $\beta$ -OH   | =O                        | $\alpha$ -CH <sub>3</sub> | H           | H  | H         | H   | COOH               | H   | CH <sub>3</sub> | $\beta$ -CH <sub>3</sub> |
| 37  | =O            | =O           | =O          | $\beta$ -OH   | =O                        | $\alpha$ -CH <sub>3</sub> | H           | H  | H         | H   | COOH               | H   | CH <sub>3</sub> | $\beta$ -CH <sub>3</sub> |
| 38  | $\beta$ -OH   | $\beta$ -OH  | =O          | H             | $\alpha$ -OH              | $\alpha$ -CH <sub>3</sub> | H           | H  | H         | H   | COOCH <sub>3</sub> | H   | CH <sub>3</sub> | $\beta$ -CH <sub>3</sub> |
| 39  | =O            | =O           | =O          | H             | =O                        | $\alpha$ -CH <sub>3</sub> | H           | H  | H         | H   | COOCH <sub>3</sub> | H   | CH <sub>3</sub> | $\beta$ -CH <sub>3</sub> |
| 40  | =O            | =O           | =O          | $\beta$ -O-Ac | =O                        | $\alpha$ -CH <sub>3</sub> | H           | H  | H         | H   | COOCH <sub>3</sub> | H   | CH <sub>3</sub> | $\beta$ -CH <sub>3</sub> |
| 41  | $\beta$ -OH   | =O           | =O          | $\beta$ -O-Ac | =O                        | $\alpha$ -CH <sub>3</sub> | H           | H  | H         | H   | COOCH <sub>3</sub> | H   | CH <sub>3</sub> | $\beta$ -CH <sub>3</sub> |
| 42  | $\beta$ -OH   | $\beta$ -OH  | =O          | $\beta$ -OH   | =O                        | $\alpha$ -CH <sub>3</sub> | H           | H  | H         | H   | COOCH <sub>3</sub> | H   | CH <sub>3</sub> | $\beta$ -CH <sub>3</sub> |
| 43  | =O            | $\beta$ -OH  | =O          | OH            | =O                        | $\alpha$ -CH <sub>3</sub> | H           | H  | H         | H   | COOCH <sub>3</sub> | H   | CH <sub>3</sub> | $\beta$ -CH <sub>3</sub> |
| 44  | $\beta$ -OH   | =O           | =O          | OH            | =O                        | $\alpha$ -CH <sub>3</sub> | H           | H  | H         | H   | COOCH <sub>3</sub> | H   | CH <sub>3</sub> | $\beta$ -CH <sub>3</sub> |
| 45  | =O            | =O           | =O          | H             | $\alpha$ -OH              | $\beta$ -CH <sub>3</sub>  | $\xi$ -OH   | H  | =O        | H   | COOH               | H   | CH <sub>3</sub> | $\beta$ -CH <sub>3</sub> |
| 46  | $\beta$ -OH   | $\beta$ -OH  | =O          | H             | =O                        | $\alpha$ -CH <sub>3</sub> | $\beta$ -OH | H  | $\xi$ -OH | H   | $\xi$ -COOH        | H   | CH <sub>3</sub> | $\beta$ -CH <sub>3</sub> |
| 47  | =O            | $\beta$ -OH  | =O          | H             | =O                        | $\alpha$ -CH <sub>3</sub> | $\beta$ -OH | H  | $\xi$ -OH | H   | $\xi$ -COOH        | H   | CH <sub>3</sub> | $\beta$ -CH <sub>3</sub> |
| 48  | $\beta$ -OH   | $\beta$ -OH  | =O          | $\beta$ -OH   | =O                        | $\beta$ -CH <sub>3</sub>  | $\beta$ -OH | H  | =O        | H   | COOH               | H   | CH <sub>3</sub> | $\beta$ -CH <sub>3</sub> |
| 49  | $\beta$ -OH   | $\beta$ -OH  | =O          | =O            | =O                        | $\alpha$ -CH <sub>3</sub> | $\xi$ -OH   | H  | =O        | H   | COOH               | H   | CH <sub>3</sub> | $\beta$ -CH <sub>3</sub> |
| 50  | $\beta$ -OH   | $\beta$ -OH  | =O          | H             | =O                        | $\alpha$ -CH <sub>3</sub> | $\beta$ -OH | H  | H         | H   | COOCH <sub>3</sub> | H   | CH <sub>3</sub> | $\beta$ -CH <sub>3</sub> |
| 51  | =O            | =O           | =O          | $\beta$ -OH   | $\alpha$ -OH              | $\alpha$ -CH <sub>3</sub> | $\beta$ -OH | H  | H         | H   | COOCH <sub>3</sub> | H   | CH <sub>3</sub> | $\beta$ -CH <sub>3</sub> |
| 52  | =O            | $\beta$ -OH  | =O          | H             | =O                        | $\alpha$ -CH <sub>3</sub> | $\beta$ -OH | H  | H         | H   | COOCH <sub>3</sub> | H   | CH <sub>3</sub> | $\beta$ -CH <sub>3</sub> |
| 53  | =O            | $\beta$ -OH  | =O          | $\alpha$ -OH  | =O                        | $\alpha$ -CH <sub>3</sub> | $\beta$ -OH | H  | H         | H   | COOCH <sub>3</sub> | H   | CH <sub>3</sub> | $\beta$ -CH <sub>3</sub> |
| 54  | $\beta$ -O-Ac | $\beta$ -OH  | =O          | H             | =O                        | $\alpha$ -CH <sub>3</sub> | H           | H  | H         | H   | COOH               | H   | CH <sub>3</sub> | $\beta$ -CH <sub>3</sub> |
| 55  | $\beta$ -O-Ac | =O           | =O          | H             | $\alpha$ -OH              | $\alpha$ -CH <sub>3</sub> | H           | H  | H         | H   | COOH               | H   | CH <sub>3</sub> | $\beta$ -CH <sub>3</sub> |



| Cpd | R1                                                                                | R2                          | R3           | R4            | R5                        | R6                        | R7 | R8                  | R9        | R10                       | R11                       | R12              | R13             | R14                           |
|-----|-----------------------------------------------------------------------------------|-----------------------------|--------------|---------------|---------------------------|---------------------------|----|---------------------|-----------|---------------------------|---------------------------|------------------|-----------------|-------------------------------|
| 56  | $\beta$ -O-Ac                                                                     | $\beta$ -OH                 | =O           | H             | =O                        | $\alpha$ -CH <sub>3</sub> | H  | H                   | H         | H                         | COOEt                     | H                | CH <sub>3</sub> | $\beta$ -CH <sub>3</sub>      |
| 57  | =O                                                                                | =O                          | =O           | H             | $\alpha$ -OH              | $\alpha$ -CH <sub>3</sub> | H  | H                   | H         | H                         | COOEt                     | H                | CH <sub>3</sub> | $\beta$ -CH <sub>3</sub>      |
| 58  | =O                                                                                | =O                          | $\alpha$ -OH | H             | H                         | $\alpha$ -CH <sub>3</sub> | H  | H                   | H         | $\alpha$ -OH              | CH <sub>2</sub> OH        | $\beta$ -OH      | CH <sub>3</sub> | $\beta$ -CH <sub>3</sub>      |
| 59  | =O                                                                                | $\beta$ -OH                 | =O           | H             | H                         | $\alpha$ -CH <sub>3</sub> | H  | H                   | H         | $\alpha$ -OH              | CH <sub>2</sub> OH        | $\beta$ -OH      | CH <sub>3</sub> | $\beta$ -CH <sub>3</sub>      |
| 60  | $\beta$ -OH                                                                       | =O                          | $\alpha$ -OH | H             | H                         | $\alpha$ -CH <sub>3</sub> | H  | H                   | H         | $\alpha$ -OH              | CH <sub>2</sub> OH        | $\beta$ -OH      | CH <sub>3</sub> | $\beta$ -CH <sub>3</sub>      |
| 61  |  | H                           | H            | H             | H                         | $\alpha$ -CH <sub>3</sub> | H  | H                   | =O        | =CH <sub>2</sub>          | COOH                      | H                | CH <sub>3</sub> | $\beta$ -CH <sub>3</sub>      |
| 62  | $\beta$ -OH                                                                       | $\beta$ -OH                 | =O           | $\alpha$ -OH  | =O                        | $\alpha$ -CH <sub>3</sub> | H  | H                   | =O        | $\alpha$ -CH <sub>3</sub> | COOH                      | H                | CH <sub>3</sub> | $\beta$ -CH <sub>3</sub>      |
| 63  | $\beta$ -OH                                                                       | $\beta$ -OH                 | =O           | $\alpha$ -OH  | =O                        | $\alpha$ -CH <sub>3</sub> | H  | H                   | =O        | H                         | COOCH <sub>3</sub>        | H                | CH <sub>3</sub> | $\beta$ -CH <sub>3</sub>      |
| 64  | $\beta$ -OH                                                                       | $\beta$ -OH                 | =O           | $\alpha$ -OH  | =O                        | $\alpha$ -CH <sub>3</sub> | H  | H                   | =O        | H                         | COOH                      | H                | CH <sub>3</sub> | $\beta$ -CH <sub>3</sub>      |
| 65  | $\beta$ -OH                                                                       | $\beta$ -OH                 | =O           | H             | $\alpha$ -OH              | $\alpha$ -CH <sub>3</sub> | H  | H                   | =O        | $\alpha$ -OH              | COOH                      | H                | CH <sub>3</sub> | $\alpha$ -CH <sub>3</sub>     |
| 66  | =O                                                                                | =O                          | =O           | H             | H                         | $\alpha$ -CH <sub>3</sub> | H  | H                   | H         | $\alpha$ -OH              | CH <sub>2</sub> OH        | $\alpha$ -OH     | CH <sub>3</sub> | $\alpha$ -CH <sub>3</sub>     |
| 67  | =O                                                                                | $\alpha$ -OH                | H            | H             | $\beta$ -OH               | $\alpha$ -CH <sub>3</sub> | H  | H                   | H         | $\alpha$ -OH              | CH <sub>3</sub>           | H                | CH <sub>3</sub> | $\alpha$ -CH <sub>3</sub>     |
| 68  | $\beta$ -OH                                                                       | =O                          | =O           | $\beta$ -OH   | $\alpha$ -CH <sub>3</sub> | $\beta$ -OH               | H  | H                   | =O        | H                         | COOH                      | H                | CH <sub>3</sub> | $\alpha$ -CH <sub>3</sub>     |
| 69  | $\beta$ -OH                                                                       | H                           | =O           | H             | H                         | $\alpha$ -CH <sub>3</sub> | H  | H                   | H         | $\alpha$ -OH              | CH <sub>2</sub> OH        | OH               | CH <sub>3</sub> | $\alpha$ -CH <sub>3</sub>     |
| 70  | $\beta$ -OH                                                                       | =O                          | $\alpha$ -OH | =O            | H                         | $\alpha$ -CH <sub>3</sub> | H  | H                   | H         | $\alpha$ -OH              | CH <sub>3</sub>           | OH               | CH <sub>3</sub> | $\alpha$ -CH <sub>3</sub>     |
| 71  | =O                                                                                | =O                          | =O           | H             | H                         | $\alpha$ -CH <sub>3</sub> | H  | H                   | H         | OH                        | CH <sub>2</sub> OH        | OCH <sub>3</sub> | CH <sub>3</sub> | $\alpha$ -CH <sub>3</sub>     |
| 72  | =O                                                                                | $\beta$ -OH                 | =O           | H             | $\beta$ -OH               | $\alpha$ -CH <sub>3</sub> | H  | H                   | =O        | H                         | COOCH <sub>3</sub>        | H                | CH <sub>3</sub> | $\alpha$ -CH <sub>2</sub> OH  |
| 73  | $\beta$ -OH                                                                       | $\beta$ -OH                 | =O           | H             | $\beta$ -OH               | $\alpha$ -CH <sub>3</sub> | H  | H                   | =O        | H                         | COOCH <sub>3</sub>        | H                | CH <sub>3</sub> | $\beta$ -CH <sub>3</sub>      |
| 74  | =O                                                                                | =O                          | =O           | H             | $\beta$ -OH               | $\alpha$ -CH <sub>3</sub> | OH | H                   | =O        | H                         | COOCH <sub>3</sub>        | H                | CH <sub>3</sub> | $\beta$ -CH <sub>3</sub>      |
| 75  | =O                                                                                | =O                          | H            | H             | $\beta$ -OH               | $\alpha$ -CH <sub>3</sub> | H  | H                   | H         | H                         | COOH                      | H                | CH <sub>3</sub> | $\alpha$ -CH <sub>2</sub> OH  |
| 76  | =O                                                                                | =O                          | H            | H             | $\beta$ -OH               | $\alpha$ -CH <sub>3</sub> | H  | H                   | H         | H                         | COOH                      | H                | CH <sub>3</sub> | $\alpha$ -CH <sub>2</sub> OAc |
| 77  | =O                                                                                | =O                          | =O           | H             | $\beta$ -OH               | $\alpha$ -CH <sub>3</sub> | H  | H                   | H         | H                         | COOH                      | H                | CH <sub>3</sub> | H                             |
| 78  | =O                                                                                | =O                          | H            | H             | H                         | $\alpha$ -CH <sub>3</sub> | H  | H                   | H         | $\alpha$ -OH              | CH <sub>3</sub>           | OH               | CH <sub>3</sub> | $\beta$ -CH <sub>3</sub>      |
| 78  | =O                                                                                | $\alpha$ -O-Et              | H            | H             | H                         | $\beta$ -CH <sub>3</sub>  | H  | H                   | H         | $\xi$ -OH                 | CH <sub>2</sub> OH        | OH               | CH <sub>3</sub> | $\beta$ -CH <sub>3</sub>      |
| 80  | =O                                                                                | =O                          | H            | H             | H                         | $\beta$ -CH <sub>3</sub>  | H  | H                   | H         | $\xi$ -OH                 | CH <sub>2</sub> OH        | OH               | CH <sub>3</sub> | $\beta$ -CH <sub>3</sub>      |
| 81  | =O                                                                                | $\alpha$ -O-CH <sub>3</sub> | H            | H             | H                         | $\beta$ -CH <sub>3</sub>  | H  | H                   | H         | $\xi$ -OH                 | CH <sub>2</sub> OH        | OH               | CH <sub>3</sub> | $\beta$ -CH <sub>3</sub>      |
| 82  | $\beta$ -OH                                                                       | =O                          | H            | H             | H                         | $\beta$ -CH <sub>3</sub>  | H  | H                   | H         | $\xi$ -OH                 | CH <sub>2</sub> OH        | OH               | CH <sub>3</sub> | $\beta$ -CH <sub>3</sub>      |
| 83  | $\beta$ -OH                                                                       | =O                          | H            | H             | H                         | $\alpha$ -CH <sub>3</sub> | H  | H                   | H         | $\alpha$ -OH              | CH <sub>3</sub>           | OH               | CH <sub>3</sub> | $\beta$ -CH <sub>3</sub>      |
| 84  | =O                                                                                | =O                          | =O           | H             | H                         | $\alpha$ -CH <sub>3</sub> | H  | H                   | H         | $\alpha$ -OH              | CH <sub>3</sub>           | OH               | CH <sub>3</sub> | $\beta$ -CH <sub>3</sub>      |
| 85  | =O                                                                                | =O                          | =O           | H             | =O                        | CH <sub>3</sub>           | -  | H, $\Delta^{20,22}$ | =O        | H                         | COOH                      | H                | CH <sub>3</sub> | $\beta$ -CH <sub>3</sub>      |
| 85  | $\beta$ -OH                                                                       | $\beta$ -OH                 | =O           | H             | $\beta$ -OH               | CH <sub>3</sub>           | -  | H, $\Delta^{20,22}$ | =O        | H                         | COOCH <sub>3</sub>        | H                | CH <sub>3</sub> | $\beta$ -CH <sub>3</sub>      |
| 86  | $\beta$ -OH                                                                       | =O                          | =O           | H             | $\beta$ -OH               | CH <sub>3</sub>           | -  | H, $\Delta^{20,22}$ | =O        | H                         | COOCH <sub>3</sub>        | H                | CH <sub>3</sub> | $\beta$ -CH <sub>3</sub>      |
| 87  | $\beta$ -OH                                                                       | $\beta$ -OH                 | =O           | H             | H                         | CH <sub>3</sub>           | -  | H, $\Delta^{20,22}$ | =O        | H                         | COOH                      | H                | CH <sub>3</sub> | $\beta$ -CH <sub>3</sub>      |
| 88  | =O                                                                                | =O                          | =O           | H             | H                         | CH <sub>3</sub>           | -  | H, $\Delta^{20,22}$ | =O        | H                         | COOH                      | H                | CH <sub>3</sub> | $\beta$ -CH <sub>3</sub>      |
| 89  | =O                                                                                | $\beta$ -OH                 | =O           | H             | $\beta$ -OH               | CH <sub>3</sub>           | -  | H, $\Delta^{20,22}$ | =O        | H                         | COOCH <sub>3</sub>        | H                | CH <sub>3</sub> | $\alpha$ -CH <sub>2</sub> OH  |
| 90  | $\beta$ -OH                                                                       | =O                          | =O           | $\beta$ -O-Ac | =O                        | CH <sub>3</sub>           | -  | H, $\Delta^{20,22}$ | =O        | H                         | COOCH <sub>3</sub>        | H                | CH <sub>3</sub> | $\beta$ -CH <sub>3</sub>      |
| 91  | =O                                                                                | H                           | =O           | H             | $\alpha$ -OH              | CH <sub>3</sub>           | -  | H, $\Delta^{20,22}$ | =O        | H                         | COOCH <sub>3</sub>        | H                | CH <sub>3</sub> | $\beta$ -CH <sub>3</sub>      |
| 92  | $\beta$ -OH                                                                       | =O                          | =O           | $\beta$ -O-Ac | =O                        | CH <sub>3</sub>           | -  | H, $\Delta^{20,22}$ | =O        | H                         | COOH                      | H                | CH <sub>3</sub> | $\beta$ -CH <sub>3</sub>      |
| 93  | =O                                                                                | $\beta$ -OH                 | =O           | H             | =O                        | CH <sub>3</sub>           | -  | H, $\Delta^{20,22}$ | $\xi$ -OH | H                         | $\xi$ -COOH               | H                | CH <sub>3</sub> | $\beta$ -CH <sub>3</sub>      |
| 94  | =O                                                                                | $\beta$ -OH                 | =O           | H             | =O                        | CH <sub>3</sub>           | -  | H, $\Delta^{20,22}$ | =O        | H                         | $\xi$ -COOCH <sub>3</sub> | H                | CH <sub>3</sub> | $\beta$ -CH <sub>3</sub>      |
| 95  | =O                                                                                | $\beta$ -OH                 | =O           | H             | $\alpha$ -OH              | CH <sub>3</sub>           | -  | H, $\Delta^{20,22}$ | =O        | H                         | COOH                      | H                | CH <sub>3</sub> | $\beta$ -CH <sub>3</sub>      |
| 96  | $\beta$ -OH                                                                       | $\beta$ -OH                 | =O           | H             | =O                        | CH <sub>3</sub>           | -  | H, $\Delta^{20,22}$ | =O        | H                         | COOH                      | H                | CH <sub>3</sub> | $\beta$ -CH <sub>3</sub>      |
| 97  | $\beta$ -OH                                                                       | $\beta$ -OH                 | =O           | H             | $\alpha$ -OH              | CH <sub>3</sub>           | -  | H, $\Delta^{20,22}$ | =O        | H                         | COOH                      | H                | CH <sub>3</sub> | $\beta$ -CH <sub>3</sub>      |
| 98  | =O                                                                                | $\beta$ -OH                 | =O           | H             | =O                        | CH <sub>3</sub>           | -  | H, $\Delta^{20,22}$ | =O        | H                         | COOH                      | H                | CH <sub>3</sub> | $\beta$ -CH <sub>3</sub>      |
| 99  | =O                                                                                | $\beta$ -OH                 | =O           | $\beta$ -O-Ac | =O                        | CH <sub>3</sub>           | -  | H, $\Delta^{20,22}$ | =O        | H                         | COOH                      | H                | CH <sub>3</sub> | $\beta$ -CH <sub>3</sub>      |
| 100 | =O                                                                                | =O                          | =O           | H             | =O                        | CH <sub>3</sub>           | -  | H, $\Delta^{20,22}$ | =O        | H                         | COOH                      | H                | CH <sub>3</sub> | $\beta$ -CH <sub>3</sub>      |
| 101 | =O                                                                                | =O                          | =O           | H             | $\alpha$ -OH              | CH <sub>3</sub>           | -  | H, $\Delta^{20,22}$ | =O        | H                         | COOH                      | H                | CH <sub>3</sub> | $\beta$ -CH <sub>3</sub>      |
| 102 | $\beta$ -OH                                                                       | =O                          | =O           | H             | =O                        | CH <sub>3</sub>           | -  | H, $\Delta^{20,22}$ | =O        | H                         | COCH <sub>3</sub>         | H                | CH <sub>3</sub> | $\beta$ -CH <sub>3</sub>      |
| 103 | $\beta$ -OH                                                                       | =O                          | =O           | H             | $\alpha$ -OH              | CH <sub>3</sub>           | -  | H, $\Delta^{20,22}$ | =O        | H                         | COCH <sub>3</sub>         | H                | CH <sub>3</sub> | $\beta$ -CH <sub>3</sub>      |
| 104 | $\beta$ -OH                                                                       | =O                          | =O           | H             | =O                        | CH <sub>3</sub>           | -  | H, $\Delta^{20,22}$ | =O        | H                         | COOH                      | H                | CH <sub>3</sub> | $\beta$ -CH <sub>3</sub>      |
| 105 | $\beta$ -OH                                                                       | $\beta$ -OH                 | =O           | $\beta$ -O-Ac | =O                        | CH <sub>3</sub>           | -  | H, $\Delta^{20,22}$ | =O        | H                         | COOH                      | H                | CH <sub>3</sub> | $\beta$ -CH <sub>3</sub>      |
| 106 | =O                                                                                | =O                          | =O           | $\alpha$ -OH  | $\beta$ -OH               | CH <sub>3</sub>           | -  | H, $\Delta^{20,22}$ | =O        | H                         | COOH                      | H                | CH <sub>3</sub> | $\beta$ -CH <sub>3</sub>      |
| 107 | =O                                                                                | =O                          | OH           | $\alpha$ -OH  | $\beta$ -OH               | CH <sub>3</sub>           | -  | H, $\Delta^{20,22}$ | =O        | H                         | COOH                      | H                | CH <sub>3</sub> | $\beta$ -CH <sub>3</sub>      |
| 108 | =O                                                                                | =O                          | H            | $\alpha$ -OH  | $\beta$ -OH               | CH <sub>3</sub>           | -  | H, $\Delta^{20,22}$ | =O        | H                         | COOH                      | H                | CH <sub>3</sub> | $\beta$ -CH <sub>3</sub>      |
| 109 | =O                                                                                | OH                          | =O           | OH            | =O                        | CH <sub>3</sub>           | -  | H, $\Delta^{20,22}$ | =O        | H                         | COOCH <sub>3</sub>        | H                | CH <sub>3</sub> | $\beta$ -CH <sub>3</sub>      |
| 110 | =O                                                                                | =O                          | =O           | $\beta$ -O-Ac | =O                        | CH <sub>3</sub>           | -  | H, $\Delta^{20,22}$ | =O        | H                         | COOH                      | H                | CH <sub>3</sub> | $\beta$ -CH <sub>3</sub>      |



| Cpd | R1             | R2                          | R3           | R4            | R5             | R6                        | R7 | R8            | R9          | R10                 | R11                | R12 | R13                | R14                      |
|-----|----------------|-----------------------------|--------------|---------------|----------------|---------------------------|----|---------------|-------------|---------------------|--------------------|-----|--------------------|--------------------------|
| 111 | =O             | $\beta$ -OH                 | =O           | H             | =O             | $\alpha$ -CH <sub>3</sub> | H  | H             | H           | H, $\Delta^{24,25}$ | COOH               | -   | CH <sub>3</sub>    | $\beta$ -CH <sub>3</sub> |
| 112 | =O             | $\beta$ -OH                 | =O           | H             | $\alpha$ -OH   | $\alpha$ -CH <sub>3</sub> | H  | H             | H           | H, $\Delta^{24,25}$ | COOH               | -   | CH <sub>3</sub>    | $\beta$ -CH <sub>3</sub> |
| 113 | $\beta$ -OH    | $\beta$ -OH                 | =O           | $\beta$ -O-Ac | =O             | $\alpha$ -CH <sub>3</sub> | H  | H             | H           | H, $\Delta^{24,25}$ | COOH               | -   | CH <sub>3</sub>    | $\beta$ -CH <sub>3</sub> |
| 114 | $\beta$ -OH    | H                           | =O           | $\beta$ -O-Ac | $\alpha$ -O-Ac | $\alpha$ -CH <sub>3</sub> | H  | H             | H           | H, $\Delta^{24,25}$ | COOH               | -   | CH <sub>3</sub>    | $\beta$ -CH <sub>3</sub> |
| 115 | =O             | =O                          | =O           | H             | =O             | $\alpha$ -CH <sub>3</sub> | H  | H             | $\beta$ -OH | H, $\Delta^{24,25}$ | COOH               | -   | CH <sub>3</sub>    | $\beta$ -CH <sub>3</sub> |
| 116 | $\beta$ -OH    | =O                          | H            | H             | H              | $\beta$ -CH <sub>3</sub>  | H  | H             | H           | H, $\Delta^{24,25}$ | COOH               | -   | CH <sub>3</sub>    | $\beta$ -CH <sub>3</sub> |
| 117 | =O             | OH                          | =O           | H             | =O             | $\alpha$ -CH <sub>3</sub> | H  | H             | OH          | H, $\Delta^{24,25}$ | COOH               | -   | CH <sub>3</sub>    | $\beta$ -CH <sub>3</sub> |
| 118 | =O             | =O                          | H            | H             | H              | $\alpha$ -CH <sub>3</sub> | H  | H             | H           | H, $\Delta^{24,25}$ | CHO                | -   | CH <sub>3</sub>    | $\beta$ -CH <sub>3</sub> |
| 119 | $\beta$ -OH    | =O                          | H            | H             | H              | $\alpha$ -CH <sub>3</sub> | H  | H             | H           | H, $\Delta^{24,25}$ | CHO                | -   | CH <sub>3</sub>    | $\beta$ -CH <sub>3</sub> |
| 120 | =O             | $\beta$ -OH                 | =O           | H             | $\alpha$ -OH   | $\alpha$ -CH <sub>3</sub> | H  | H             | $\beta$ -OH | H, $\Delta^{24,25}$ | COOH               | -   | CH <sub>3</sub>    | $\beta$ -CH <sub>3</sub> |
| 121 | =O             | $\alpha$ -OH                | =O           | H             | $\alpha$ -OH   | $\alpha$ -CH <sub>3</sub> | H  | H             | $\beta$ -OH | H, $\Delta^{24,25}$ | COOH               | -   | CH <sub>3</sub>    | $\beta$ -CH <sub>3</sub> |
| 122 | $\beta$ -OH    | $\beta$ -OH                 | =O           | H             | =O             | $\alpha$ -CH <sub>3</sub> | H  | H             | $\beta$ -OH | H, $\Delta^{24,25}$ | COOH               | -   | CH <sub>3</sub>    | $\beta$ -CH <sub>3</sub> |
| 123 | $\beta$ -OH    | =O                          | =O           | H             | =O             | $\alpha$ -CH <sub>3</sub> | H  | H             | $\beta$ -OH | H, $\Delta^{24,25}$ | COOH               | -   | CH <sub>3</sub>    | $\beta$ -CH <sub>3</sub> |
| 124 | $\beta$ -OH    | $\beta$ -OH                 | =O           | $\beta$ -OH   | =O             | $\alpha$ -CH <sub>3</sub> | H  | H             | $\beta$ -OH | H, $\Delta^{24,25}$ | COOH               | -   | CH <sub>3</sub>    | $\beta$ -CH <sub>3</sub> |
| 125 | $\beta$ -OH    | =O                          | =O           | $\beta$ -OH   | =O             | $\alpha$ -CH <sub>3</sub> | H  | H             | $\beta$ -OH | H, $\Delta^{24,25}$ | COOH               | -   | CH <sub>3</sub>    | $\beta$ -CH <sub>3</sub> |
| 126 | $\beta$ -OH    | $\beta$ -OH                 | =O           | H             | =O             | $\alpha$ -CH <sub>3</sub> | H  | H             | H           | H, $\Delta^{24,25}$ | COOH               | -   | CH <sub>3</sub>    | $\beta$ -CH <sub>3</sub> |
| 127 | =O             | H                           | =O           | H             | $\alpha$ -OH   | $\beta$ -CH <sub>3</sub>  | H  | H             | H           | H, $\Delta^{24,25}$ | COOH               | -   | CH <sub>3</sub>    | $\beta$ -CH <sub>3</sub> |
| 128 | =O             | $\alpha$ -OH                | H            | H             | H              | $\beta$ -CH <sub>3</sub>  | H  | H             | H           | H, $\Delta^{24,25}$ | CHO                | -   | CH <sub>3</sub>    | $\beta$ -CH <sub>3</sub> |
| 129 | $\alpha$ -O-Ac | $\alpha$ -O-Ac              | H            | H             | $\alpha$ -OH   | $\beta$ -CH <sub>3</sub>  | H  | H             | H           | H, $\Delta^{24,25}$ | COOH               | -   | CH <sub>3</sub>    | $\beta$ -CH <sub>3</sub> |
| 130 | =O             | =O                          | =O           | H             | H              | $\alpha$ -CH <sub>3</sub> | H  | H             | H           | H, $\Delta^{24,25}$ | CHO                | -   | CH <sub>3</sub>    | $\beta$ -CH <sub>3</sub> |
| 131 | =O             | =O                          | H            | H             | H              | $\alpha$ -CH <sub>3</sub> | H  | H             | H           | H, $\Delta^{24,25}$ | CH <sub>2</sub> OH | -   | CH <sub>3</sub>    | $\beta$ -CH <sub>3</sub> |
| 132 | $\alpha$ -O-Ac | $\alpha$ -O-CH <sub>3</sub> | H            | H             | $\alpha$ -OH   | $\beta$ -CH <sub>3</sub>  | H  | H             | H           | H, $\Delta^{24,25}$ | COOH               | -   | CH <sub>3</sub>    | $\beta$ -CH <sub>3</sub> |
| 133 | =O             | =O                          | $\alpha$ -OH | H             | H              | $\alpha$ -CH <sub>3</sub> | H  | H             | H           | H, $\Delta^{24,25}$ | COOH               | -   | CH <sub>3</sub>    | $\beta$ -CH <sub>3</sub> |
| 134 | =O             | =O                          | $\beta$ -OH  | H             | H              | $\alpha$ -CH <sub>3</sub> | H  | H             | H           | H, $\Delta^{24,25}$ | COOH               | -   | CH <sub>3</sub>    | $\beta$ -CH <sub>3</sub> |
| 135 | $\beta$ -OH    | =O                          | H            | H             | H              | $\alpha$ -CH <sub>3</sub> | H  | H             | H           | H, $\Delta^{24,25}$ | CH <sub>2</sub> OH | -   | CH <sub>3</sub>    | $\beta$ -CH <sub>3</sub> |
| 136 | $\beta$ -OH    | =O                          | H            | H             | H              | $\alpha$ -CH <sub>3</sub> | H  | H             | H           | H, $\Delta^{24,25}$ | CHO                | -   | CH <sub>3</sub>    | $\beta$ -CH <sub>3</sub> |
| 137 | =O             | =O                          | H            | H             | H              | $\alpha$ -CH <sub>3</sub> | H  | H             | H           | H, $\Delta^{24,25}$ | COOH               | -   | CH <sub>3</sub>    | $\beta$ -CH <sub>3</sub> |
| 138 | =O             | $\alpha$ -OH                | H            | H             | $\alpha$ -O-Ac | $\alpha$ -CH <sub>3</sub> | H  | H             | H           | H, $\Delta^{24,25}$ | COOH               | -   | CH <sub>3</sub>    | $\beta$ -CH <sub>3</sub> |
| 139 | $\beta$ -OH    | $\beta$ -OH                 | =O           | H             | $\alpha$ -OH   | $\alpha$ -CH <sub>3</sub> | H  | H             | $\beta$ -OH | H, $\Delta^{24,25}$ | COOH               | -   | CH <sub>3</sub>    | $\beta$ -CH <sub>3</sub> |
| 140 | $\beta$ -OH    | H                           | =O           | H             | $\alpha$ -OH   | $\alpha$ -CH <sub>3</sub> | H  | H             | $\beta$ -OH | H, $\Delta^{24,25}$ | COOH               | -   | CH <sub>3</sub>    | $\beta$ -CH <sub>3</sub> |
| 141 | =O             | $\beta$ -OH                 | =O           | H             | $\alpha$ -OH   | $\alpha$ -CH <sub>3</sub> | H  | H             | H           | H, $\Delta^{24,25}$ | CHO                | -   | CH <sub>3</sub>    | $\beta$ -CH <sub>3</sub> |
| 142 | =O             | H                           | =O           | H             | $\alpha$ -OH   | $\alpha$ -CH <sub>3</sub> | H  | H             | $\beta$ -OH | H, $\Delta^{24,25}$ | COOH               | -   | CH <sub>3</sub>    | $\beta$ -CH <sub>3</sub> |
| 143 | $\alpha$ -O-Ac | $\alpha$ -OH                | H            | H             | $\alpha$ -O-Ac | $\beta$ -CH <sub>3</sub>  | H  | H             | H           | H, $\Delta^{24,25}$ | COOH               | -   | CH <sub>3</sub>    | $\beta$ -CH <sub>3</sub> |
| 144 | $\alpha$ -O-Ac | $\alpha$ -OH                | H            | H             | $\alpha$ -O-Ac | $\beta$ -CH <sub>3</sub>  | H  | $\xi$ -O-Ac   | H           | H, $\Delta^{24,25}$ | COOH               | -   | CH <sub>3</sub>    | $\beta$ -CH <sub>3</sub> |
| 145 | $\alpha$ -O-Ac | $\alpha$ -O-Ac              | H            | H             | $\alpha$ -OH   | $\beta$ -CH <sub>3</sub>  | H  | $\xi$ -O-Ac   | H           | H, $\Delta^{24,25}$ | COOH               | -   | CH <sub>3</sub>    | $\beta$ -CH <sub>3</sub> |
| 146 | $\alpha$ -O-Ac | $\alpha$ -O-CH <sub>3</sub> | H            | H             | H              | $\beta$ -CH <sub>3</sub>  | H  | $\xi$ -O-Ac   | H           | H, $\Delta^{24,25}$ | COOH               | -   | CH <sub>3</sub>    | $\beta$ -CH <sub>3</sub> |
| 147 | $\alpha$ -O-Ac | $\alpha$ -O-CH <sub>3</sub> | H            | H             | $\alpha$ -OH   | $\beta$ -CH <sub>3</sub>  | H  | $\xi$ -O-Ac   | H           | H, $\Delta^{24,25}$ | COOH               | -   | CH <sub>3</sub>    | $\beta$ -CH <sub>3</sub> |
| 148 | $\alpha$ -O-Ac | $\alpha$ -OH                | H            | H             | $\alpha$ -OH   | $\beta$ -CH <sub>3</sub>  | H  | $\xi$ -O-Ac   | H           | H, $\Delta^{24,25}$ | COOH               | -   | CH <sub>3</sub>    | $\beta$ -CH <sub>3</sub> |
| 149 | $\alpha$ -OH   | $\alpha$ -O-CH <sub>3</sub> | H            | H             | H              | $\beta$ -CH <sub>3</sub>  | H  | $\xi$ -O-Ac   | H           | H, $\Delta^{24,25}$ | COOH               | -   | CH <sub>3</sub>    | $\beta$ -CH <sub>3</sub> |
| 150 | $\alpha$ -O-Ac | $\alpha$ -OH                | H            | H             | H              | $\alpha$ -CH <sub>3</sub> | H  | $\beta$ -O-Ac | H           | H, $\Delta^{24,25}$ | COOH               | -   | CH <sub>3</sub>    | $\beta$ -CH <sub>3</sub> |
| 151 | $\beta$ -O-Ac  | =O                          | H            | H             | H              | $\alpha$ -CH <sub>3</sub> | H  | $\beta$ -O-Ac | H           | H, $\Delta^{24,25}$ | COOH               | -   | CH <sub>3</sub>    | $\beta$ -CH <sub>3</sub> |
| 152 | $\beta$ -OH    | =O                          | H            | H             | H              | $\alpha$ -CH <sub>3</sub> | H  | $\beta$ -O-Ac | H           | H, $\Delta^{24,25}$ | COOH               | -   | CH <sub>3</sub>    | $\beta$ -CH <sub>3</sub> |
| 153 | =O             | $\alpha$ -OH                | H            | H             | $\alpha$ -O-Ac | $\alpha$ -CH <sub>3</sub> | H  | $\beta$ -O-Ac | H           | H, $\Delta^{24,25}$ | COOH               | -   | CH <sub>3</sub>    | $\beta$ -CH <sub>3</sub> |
| 154 | =O             | $\alpha$ -OH                | H            | H             | H              | $\alpha$ -CH <sub>3</sub> | H  | $\beta$ -O-Ac | H           | H, $\Delta^{24,25}$ | COOH               | -   | CH <sub>3</sub>    | $\beta$ -CH <sub>3</sub> |
| 155 | =O             | $\alpha$ -O-CH <sub>3</sub> | H            | H             | H              | $\alpha$ -CH <sub>3</sub> | H  | $\beta$ -O-Ac | H           | H, $\Delta^{24,25}$ | COOH               | -   | CH <sub>3</sub>    | $\beta$ -CH <sub>3</sub> |
| 156 | $\alpha$ -O-Ac | $\alpha$ -OH                | H            | H             | $\alpha$ -O-Ac | $\alpha$ -CH <sub>3</sub> | H  | $\beta$ -O-Ac | H           | H, $\Delta^{24,25}$ | COOH               | -   | CH <sub>3</sub>    | $\beta$ -CH <sub>3</sub> |
| 157 | $\alpha$ -O-Ac | $\alpha$ -O-CH <sub>3</sub> | H            | H             | $\alpha$ -O-Ac | $\alpha$ -CH <sub>3</sub> | H  | $\beta$ -O-Ac | H           | H, $\Delta^{24,25}$ | COOH               | -   | CH <sub>3</sub>    | $\beta$ -CH <sub>3</sub> |
| 158 | =O             | H                           | H            | H             | $\alpha$ -O-Ac | $\alpha$ -CH <sub>3</sub> | H  | $\beta$ -O-Ac | H           | H, $\Delta^{24,25}$ | COOH               | -   | CH <sub>3</sub>    | $\beta$ -CH <sub>3</sub> |
| 159 | $\beta$ -O-Ac  | H                           | H            | H             | $\alpha$ -O-Ac | $\alpha$ -CH <sub>3</sub> | H  | $\beta$ -O-Ac | H           | H, $\Delta^{24,25}$ | COOH               | -   | CH <sub>3</sub>    | $\beta$ -CH <sub>3</sub> |
| 160 | $\beta$ -OH    | H                           | H            | H             | $\alpha$ -O-Ac | $\alpha$ -CH <sub>3</sub> | H  | $\beta$ -O-Ac | H           | H, $\Delta^{24,25}$ | COOH               | -   | CH <sub>3</sub>    | $\beta$ -CH <sub>3</sub> |
| 161 | =O             | H                           | H            | H             | $\alpha$ -OH   | $\alpha$ -CH <sub>3</sub> | H  | H             | H           | H, $\Delta^{24,25}$ | COOH               | -   | CH <sub>3</sub>    | $\beta$ -CH <sub>3</sub> |
| 162 | =O             | $\alpha$ -OH                | H            | H             | $\alpha$ -OH   | $\alpha$ -CH <sub>3</sub> | H  | H             | H           | H, $\Delta^{24,25}$ | COOH               | -   | CH <sub>3</sub>    | $\beta$ -CH <sub>3</sub> |
| 163 | $\beta$ -O-Ac  | $\alpha$ -OH                | H            | H             | H              | $\alpha$ -CH <sub>3</sub> | H  | H             | H           | H, $\Delta^{24,25}$ | COOH               | -   | CH <sub>3</sub>    | $\beta$ -CH <sub>3</sub> |
| 164 | $\beta$ -O-Ac  | $\alpha$ -OH                | H            | H             | $\alpha$ -O-Ac | $\alpha$ -CH <sub>3</sub> | H  | H             | H           | H, $\Delta^{24,25}$ | COOH               | -   | CH <sub>3</sub>    | $\beta$ -CH <sub>3</sub> |
| 165 | $\beta$ -O-Ac  | $\alpha$ -OH                | H            | H             | $\alpha$ -O-Ac | $\alpha$ -CH <sub>3</sub> | H  | $\beta$ -O-Ac | H           | H, $\Delta^{24,25}$ | COOH               | -   | CH <sub>3</sub>    | $\beta$ -CH <sub>3</sub> |
| 166 | $\beta$ -OH    | =O                          | $\alpha$ -OH | H             | H              | $\alpha$ -CH <sub>3</sub> | H  | H             | H           | H, $\Delta^{24,25}$ | CH <sub>2</sub> OH | -   | CH <sub>2</sub> OH | $\beta$ -CH <sub>3</sub> |



| Cpd | R1             | R2                          | R3           | R4            | R5             | R6                                       | R7        | R8            | R9                  | R10                 | R11                               | R12 | R13                | R14                                                                                 |
|-----|----------------|-----------------------------|--------------|---------------|----------------|------------------------------------------|-----------|---------------|---------------------|---------------------|-----------------------------------|-----|--------------------|-------------------------------------------------------------------------------------|
| 167 | $\beta$ -OH    | =O                          | H            | $\beta$ -OH   | =O             | $\alpha$ -CH <sub>3</sub>                | H         | H             | H                   | H, $\Delta^{24,25}$ | COOH                              | -   | CH <sub>3</sub>    |  |
| 168 | $\beta$ -OH    | =O                          | H            | $\beta$ -O-Ac | =O             | $\alpha$ -CH <sub>3</sub>                | H         | H             | H                   | H, $\Delta^{24,25}$ | COOH                              | -   | CH <sub>3</sub>    | $\beta$ -CH <sub>3</sub>                                                            |
| 169 | =O             | =O                          | $\alpha$ -OH | H             | H              | $\alpha$ -CH <sub>3</sub>                | H         | H             | H                   | H, $\Delta^{24,25}$ | CHO                               | -   | CH <sub>3</sub>    | $\beta$ -CH <sub>3</sub>                                                            |
| 170 | $\beta$ -OH    | H                           | H            | H             | H              | $\alpha$ -COOH                           | H         | H             | H                   | H, $\Delta^{24,25}$ | CH <sub>2</sub> OH                | -   | CH <sub>3</sub>    | $\beta$ -CH <sub>3</sub>                                                            |
| 171 | $\alpha$ -O-Ac | H                           | H            | H             | H              | CH <sub>2</sub> O- $\beta$ -D-xylosyl    | H         | H             | H                   | H, $\Delta^{24,25}$ | CH <sub>3</sub>                   | -   | CH <sub>3</sub>    | $\beta$ -CH <sub>3</sub>                                                            |
| 172 | $\alpha$ -O-Ac | H                           | H            | H             | H              | $\alpha$ -COOH                           | H         | H             | H                   | H, $\Delta^{24,25}$ | CH <sub>3</sub>                   | -   | CH <sub>3</sub>    | $\beta$ -CH <sub>3</sub>                                                            |
| 173 | =O             | H                           | H            | H             | H              | $\alpha$ -COO- $\beta$ -D-glucopyranosyl | H         | H             | H                   | H, $\Delta^{24,25}$ | CH <sub>3</sub>                   | -   | CH <sub>3</sub>    | $\beta$ -CH <sub>3</sub>                                                            |
| 174 | $\alpha$ -O-Ac | H                           | H            | H             | H              | $\alpha$ -COOH                           | H         | H             | H                   | H, $\Delta^{24,25}$ | CH <sub>3</sub>                   | -   | CH <sub>3</sub>    | $\beta$ -CH <sub>3</sub>                                                            |
| 175 | =O             | H                           | H            | H             | H              | $\alpha$ -COOH                           | H         | H             | H                   | H, $\Delta^{24,25}$ | CH <sub>3</sub>                   | -   | CH <sub>3</sub>    | $\beta$ -CH <sub>3</sub>                                                            |
| 176 | $\beta$ -OH    | H                           | H            | H             | H              | $\alpha$ -COOH                           | H         | H             | H                   | H, $\Delta^{24,25}$ | CH <sub>3</sub>                   | -   | CH <sub>3</sub>    | $\beta$ -CH <sub>3</sub>                                                            |
| 177 | =O             | $\beta$ -OH                 | =O           | $\beta$ -OH   | =O             | $\alpha$ -CH <sub>3</sub>                | H         | H             | H                   | H, $\Delta^{24,25}$ | COOH                              | -   | CH <sub>3</sub>    | $\beta$ -CH <sub>2</sub> OH                                                         |
| 178 | =O             | $\beta$ -OH                 | =O           | $\beta$ -OH   | $\alpha$ -OH   | $\alpha$ -CH <sub>3</sub>                | H         | H             | H                   | H, $\Delta^{24,25}$ | COOH                              | -   | CH <sub>3</sub>    | $\beta$ -CH <sub>2</sub> OH                                                         |
| 179 | =O             | $\alpha$ -OH                | =O           | $\beta$ -OH   | $\alpha$ -OH   | $\alpha$ -CH <sub>3</sub>                | H         | H             | H                   | H, $\Delta^{24,25}$ | COOH                              | -   | CH <sub>3</sub>    | $\beta$ -CH <sub>2</sub> OH                                                         |
| 180 | =O             | =O                          | =O           | $\beta$ -OH   | $\alpha$ -OH   | $\alpha$ -CH <sub>3</sub>                | H         | H             | H                   | H, $\Delta^{24,25}$ | COOH                              | -   | CH <sub>3</sub>    | $\beta$ -CH <sub>2</sub> OH                                                         |
| 181 | =O             | $\beta$ -OH                 | =O           | $\beta$ -O-Ac | =O             | $\alpha$ -CH <sub>3</sub>                | H         | H             | H                   | H, $\Delta^{24,25}$ | COOH                              | -   | CH <sub>3</sub>    | $\beta$ -CH <sub>2</sub> OH                                                         |
| 182 | =O             | $\alpha$ -OH                | =O           | $\beta$ -O-Ac | $\alpha$ -OH   | $\alpha$ -CH <sub>3</sub>                | H         | H             | H                   | H, $\Delta^{24,25}$ | COOH                              | -   | CH <sub>3</sub>    | $\beta$ -CH <sub>2</sub> OH                                                         |
| 183 | =O             | =O                          | =O           | $\beta$ -O-Ac | $\alpha$ -OH   | $\alpha$ -CH <sub>3</sub>                | H         | H             | H                   | H, $\Delta^{24,25}$ | COOH                              | -   | CH <sub>3</sub>    | $\beta$ -CH <sub>2</sub> OH                                                         |
| 184 | =O             | =O                          | =O           | $\beta$ -O-Ac | =O             | $\alpha$ -CH <sub>3</sub>                | H         | H             | H                   | H, $\Delta^{24,25}$ | COOH                              | -   | CH <sub>3</sub>    | $\beta$ -CH <sub>2</sub> OH                                                         |
| 185 | =O             | H                           | =O           | $\beta$ -O-Ac | $\alpha$ -OH   | $\alpha$ -CH <sub>3</sub>                | H         | H             | H                   | H, $\Delta^{24,25}$ | COOH                              | -   | CH <sub>3</sub>    | $\beta$ -CH <sub>2</sub> OH                                                         |
| 186 | =O             | $\beta$ -OH                 | =O           | $\beta$ -O-Ac | =O             | $\alpha$ -CH <sub>3</sub>                | H         | H             | H                   | H, $\Delta^{24,25}$ | COOCH <sub>3</sub>                | -   | CH <sub>3</sub>    | $\beta$ -CH <sub>2</sub> OH                                                         |
| 187 | =O             | =O                          | =O           | $\beta$ -OH   | =O             | $\alpha$ -CH <sub>3</sub>                | H         | H             | H                   | H, $\Delta^{24,25}$ | COOH                              | -   | CH <sub>3</sub>    | $\beta$ -CH <sub>2</sub> OH                                                         |
| 188 | =O             | H                           | =O           | $\beta$ -OH   | $\alpha$ -OH   | $\alpha$ -CH <sub>3</sub>                | H         | H             | H                   | H, $\Delta^{24,25}$ | COOH                              | -   | CH <sub>3</sub>    | $\beta$ -CH <sub>2</sub> OH                                                         |
| 189 | =O             | $\beta$ -OH                 | =O           | H             | $\alpha$ -OH   | $\alpha$ -CH <sub>3</sub>                | H         | H             | H                   | H, $\Delta^{24,25}$ | COOH                              | -   | CH <sub>3</sub>    | $\beta$ -CH <sub>2</sub> OH                                                         |
| 190 | =O             | =O                          | =O           | H             | =O             | $\alpha$ -CH <sub>3</sub>                | H         | H             | H                   | H, $\Delta^{24,25}$ | COOH                              | -   | CH <sub>3</sub>    | $\beta$ -CH <sub>2</sub> OH                                                         |
| 191 | =O             | H                           | =O           | H             | $\alpha$ -OH   | $\alpha$ -CH <sub>3</sub>                | H         | H             | H                   | H, $\Delta^{24,25}$ | COOH                              | -   | CH <sub>3</sub>    | $\beta$ -CH <sub>2</sub> OH                                                         |
| 192 | =O             | H                           | =O           | $\beta$ -OH   | $\alpha$ -OH   | $\alpha$ -CH <sub>3</sub>                | H         | H             | H                   | H, $\Delta^{24,25}$ | COOH                              | -   | CH <sub>3</sub>    | $\beta$ -CH <sub>2</sub> OH                                                         |
| 193 | =O             | $\alpha$ -OH                | H            | H             | $\alpha$ -OH   | $\alpha$ -CH <sub>3</sub>                | H         | H             | H                   | H, $\Delta^{24,25}$ | CH <sub>2</sub> OH                | -   | CH <sub>3</sub>    | $\beta$ -CH <sub>3</sub>                                                            |
| 194 | =O             | $\alpha$ -OH                | H            | H             | $\alpha$ -OH   | $\alpha$ -CH <sub>3</sub>                | H         | H             | H                   | H, $\Delta^{24,25}$ | CH <sub>2</sub> OH                | -   | CH <sub>2</sub> OH | $\beta$ -CH <sub>3</sub>                                                            |
| 195 | =O             | =O                          | H            | H             | H              | $\alpha$ -CH <sub>3</sub>                | H         | H             | H                   | H, $\Delta^{24,25}$ | COOH                              | -   | CH <sub>3</sub>    | $\beta$ -CH <sub>3</sub>                                                            |
| 196 | =O             | =O                          | =O           | H             | $\beta$ -OH    | $\alpha$ -CH <sub>3</sub>                | H         | H             | H                   | H, $\Delta^{24,25}$ | COOH                              | -   | CH <sub>3</sub>    | $\beta$ -CH <sub>3</sub>                                                            |
| 197 | =O             | =O                          | $\alpha$ -OH | H             | H              | $\alpha$ -CH <sub>3</sub>                | H         | H             | H                   | H, $\Delta^{24,25}$ | COOH                              | -   | CH <sub>3</sub>    | $\beta$ -CH <sub>3</sub>                                                            |
| 198 | =O             | =O                          | H            | H             | H              | $\alpha$ -CH <sub>2</sub> OH             | H         | H             | H                   | H, $\Delta^{24,25}$ | CH <sub>2</sub> OH                | -   | CH <sub>3</sub>    | $\beta$ -CH <sub>3</sub>                                                            |
| 199 | =O             | =O                          | =O           | H             | $\beta$ -OH    | CH <sub>2</sub> Cl                       | $\xi$ -OH | H             | H                   | H, $\Delta^{24,25}$ | COOH                              | -   | CH <sub>3</sub>    | CH <sub>2</sub> OH                                                                  |
| 200 | =O             | =O                          | =O           | H             | $\beta$ -OH    | CH <sub>3</sub>                          | $\xi$ -OH | H             | H                   | H, $\Delta^{24,25}$ | COOH                              | -   | CH <sub>3</sub>    | $\beta$ -CH <sub>2</sub> OH                                                         |
| 201 | =O             | =O                          | =O           | H             | $\beta$ -OH    | CH <sub>3</sub>                          | $\xi$ -OH | H             | H                   | H, $\Delta^{24,25}$ | COOH                              | -   | CH <sub>3</sub>    | $\beta$ -CH <sub>3</sub>                                                            |
| 202 | $\beta$ -OH    | =O                          | =O           | H             | $\beta$ -OH    | CH <sub>3</sub>                          | $\xi$ -OH | H             | H                   | H, $\Delta^{24,25}$ | COOH                              | -   | CH <sub>3</sub>    | $\beta$ -CH <sub>2</sub> OH                                                         |
| 203 | =O             | =O                          | =O           | H             | =O             | CH <sub>3</sub>                          | $\xi$ -OH | H             | H                   | H, $\Delta^{24,25}$ | COOH                              | -   | CH <sub>3</sub>    | CH <sub>3</sub>                                                                     |
| 204 | $\beta$ -OH    | =O                          | H            | H             | H              | $\beta$ -CH <sub>3</sub>                 | H         | H             | H                   | H, $\Delta^{24,25}$ | CH <sub>2</sub> OH                | -   | CH <sub>2</sub> OH | $\beta$ -CH <sub>3</sub>                                                            |
| 205 | =O             | $\beta$ -CH <sub>3</sub>    | H            | H             | $\alpha$ -OH   | $\beta$ -CH <sub>3</sub>                 | H         | H             | H                   | H, $\Delta^{24,25}$ | CH <sub>2</sub> OH                | -   | CH <sub>2</sub> OH | $\beta$ -CH <sub>3</sub>                                                            |
| 206 | =O             | =O                          | H            | H             | H              | $\alpha$ -CH <sub>3</sub>                | H         | H             | H                   | H, $\Delta^{24,25}$ | CH <sub>2</sub> OH                | -   | CH <sub>2</sub> OH | $\beta$ -CH <sub>3</sub>                                                            |
| 207 | $\beta$ -O-Ac  | H                           | H            | H             | $\alpha$ -O-Ac | $\alpha$ -CH <sub>3</sub>                | H         | H             | H                   | H, $\Delta^{24,25}$ | COOH                              | -   | CH <sub>3</sub>    | $\beta$ -CH <sub>3</sub>                                                            |
| 208 | $\alpha$ -O-Ac | =O                          | =O           | H             | $\alpha$ -O-Ac | $\alpha$ -CH <sub>3</sub>                | H         | $\beta$ -O-Ac | H                   | H, $\Delta^{24,25}$ | COOH                              | -   | CH <sub>3</sub>    | $\beta$ -CH <sub>3</sub>                                                            |
| 209 | $\alpha$ -O-Ac | =O                          | =O           | H             | $\alpha$ -OH   | $\alpha$ -CH <sub>3</sub>                | H         | $\beta$ -O-Ac | H                   | H, $\Delta^{24,25}$ | COOH                              | -   | CH <sub>3</sub>    | $\beta$ -CH <sub>3</sub>                                                            |
| 210 | =O             | =O                          | H            | H             | H              | $\alpha$ -CH <sub>3</sub>                | H         | $\beta$ -O-Ac | H                   | H, $\Delta^{24,25}$ | COOH                              | -   | CH <sub>3</sub>    | $\beta$ -CH <sub>3</sub>                                                            |
| 211 | $\beta$ -O-Ac  | =O                          | H            | H             | H              | $\alpha$ -CH <sub>3</sub>                | H         | $\beta$ -O-Ac | H                   | H, $\Delta^{24,25}$ | COOH                              | -   | CH <sub>3</sub>    | $\beta$ -CH <sub>3</sub>                                                            |
| 212 | $\beta$ -OH    | =O                          | H            | H             | H              | $\alpha$ -COOH                           | H         | =O            | H                   | H, $\Delta^{24,25}$ | CH <sub>3</sub>                   | -   | CH <sub>3</sub>    | $\beta$ -CH <sub>3</sub>                                                            |
| 213 | =O             | $\alpha$ -O-Ac              | H            | H             | H              | $\alpha$ -OH                             | H         | H             | H                   | H, $\Delta^{24,25}$ | COOH                              | -   | CH <sub>3</sub>    | $\beta$ -CH <sub>3</sub>                                                            |
| 214 | $\beta$ -OH    | H                           | H            | H             | H              | $\alpha$ -CH <sub>3</sub>                | H         | OH            | H                   | H, $\Delta^{24,25}$ | CH <sub>2</sub> OH                | -   | CH <sub>3</sub>    | $\beta$ -CH <sub>3</sub>                                                            |
| 215 | $\beta$ -OH    | H                           | H            | H             | H              | $\alpha$ -CH <sub>3</sub>                | H         | $\beta$ -O-Ac | H                   | H, $\Delta^{24,25}$ | COOH                              | -   | CH <sub>3</sub>    | $\beta$ -CH <sub>3</sub>                                                            |
| 216 | $\alpha$ -OH   | =O                          | =O           | H             | H              | $\alpha$ -CH <sub>3</sub>                | H         | $\beta$ -O-Ac | H                   | H, $\Delta^{24,25}$ | COOH                              | -   | CH <sub>3</sub>    | $\beta$ -CH <sub>3</sub>                                                            |
| 217 | $\beta$ -OH    | =O                          | $\alpha$ -OH | H             | H              | $\alpha$ -CH <sub>3</sub>                | H         | H             | H                   | H, $\Delta^{24,25}$ | CH <sub>2</sub> OH                | -   | CH <sub>3</sub>    | $\beta$ -CH <sub>3</sub>                                                            |
| 218 | =O             | $\alpha$ -OH                | H            | H             | H              | $\alpha$ -CH <sub>3</sub>                | H         | H             | H                   | H, $\Delta^{24,25}$ | COOH                              | -   | CH <sub>3</sub>    | $\beta$ -CH <sub>3</sub>                                                            |
| 219 | =O             | $\alpha$ -O-CH <sub>3</sub> | H            | H             | H              | $\alpha$ -CH <sub>3</sub>                | H         | H             | H                   | H, $\Delta^{24,25}$ | COOH                              | -   | CH <sub>3</sub>    | $\beta$ -CH <sub>3</sub>                                                            |
| 220 | $\beta$ -O-Ac  | $\alpha$ -O-CH <sub>3</sub> | H            | H             | H              | $\alpha$ -CH <sub>3</sub>                | H         | H             | $\beta$ -O-Ac       | H, $\Delta^{24,25}$ | COOH                              | -   | CH <sub>3</sub>    | $\beta$ -CH <sub>3</sub>                                                            |
| 221 | $\beta$ -O-Ac  | $\alpha$ -O-CH <sub>3</sub> | H            | H             | $\alpha$ -O-Ac | $\alpha$ -CH <sub>3</sub>                | H         | H             | $\beta$ -O-Ac       | H, $\Delta^{24,25}$ | COOH                              | -   | CH <sub>3</sub>    | $\beta$ -CH <sub>3</sub>                                                            |
| 222 | $\beta$ -O-Ac  | $\alpha$ -O-CH <sub>3</sub> | H            | H             | $\alpha$ -O-Ac | $\alpha$ -CH <sub>3</sub>                | H         | H             | H                   | H, $\Delta^{24,25}$ | COOH                              | -   | CH <sub>3</sub>    | $\beta$ -CH <sub>3</sub>                                                            |
| 223 | =O             | $\beta$ -OH                 | H            | H             | H              | $\alpha$ -CH <sub>3</sub>                | H         | H             | H                   | $\alpha$ -OH        | H <sub>2</sub> , $\Delta^{25,26}$ | -   | CH <sub>3</sub>    | $\beta$ -CH <sub>3</sub>                                                            |
| 224 | =O             | =O                          | H            | H             | H              | $\alpha$ -CH <sub>3</sub>                | H         | H             | H                   | $\alpha$ -OH        | H <sub>2</sub> , $\Delta^{25,26}$ | -   | CH <sub>3</sub>    | $\beta$ -CH <sub>3</sub>                                                            |
| 225 | =O             | H                           | H            | H             | H              | $\alpha$ -CH <sub>3</sub>                | H         | H             | H                   | CH <sub>3</sub>     | H <sub>2</sub> , $\Delta^{25,26}$ | -   | CH <sub>3</sub>    | $\beta$ -CH <sub>3</sub>                                                            |
| 226 | $\alpha$ -O-Ac | H                           | H            | H             | H              | $\alpha$ -COOH                           | H         | H             | H                   | CH <sub>3</sub>     | H <sub>2</sub> , $\Delta^{25,26}$ | -   | CH <sub>3</sub>    | $\beta$ -CH <sub>3</sub>                                                            |
| 227 | $\alpha$ -O-Ac | H                           | H            | H             | H              | $\alpha$ -COO- $\beta$ -D-xylosyl        | H         | H             | H, $\Delta^{23,24}$ | CH <sub>3</sub>     | H <sub>2</sub> , $\Delta^{25,26}$ | -   | CH <sub>3</sub>    | $\beta$ -CH <sub>3</sub>                                                            |
| 228 | $\alpha$ -O-Ac | =O                          | H            | H             | H              | $\alpha$ -COOH                           | H         | H             | H                   | =CH <sub>2</sub>    | CH <sub>3</sub>                   | H   | CH <sub>3</sub>    | $\beta$ -CH <sub>3</sub>                                                            |
| 229 | =O             | =O                          | =O           | H             | =O             | CH <sub>3</sub> , $\Delta^{17,20}$       | -         | H             | =O                  | H                   | COOH                              | H   | CH <sub>3</sub>    | $\beta$ -CH <sub>3</sub>                                                            |
| 230 | $\beta$ -OH    | $\beta$ -OH                 | =O           | H             | $\beta$ -OH    | CH <sub>3</sub> , $\Delta^{17,20}$       | -         | H             | =O                  | H                   | CH <sub>3</sub>                   | H   | COOCH <sub>3</sub> | $\beta$ -CH <sub>3</sub>                                                            |
| 231 | =O             | =O                          | =O           | $\beta$ -O-Ac | =O             | CH <sub>3</sub> , $\Delta^{17,20}$       | -         | H             | =O                  | H                   | CH <sub>3</sub>                   | H   | COOH               | $\beta$ -CH <sub>3</sub>                                                            |



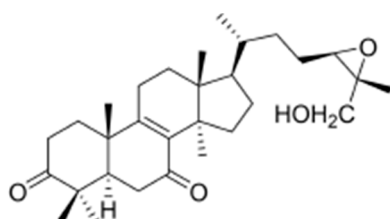

| Cpd | R1           | R2                        |
|-----|--------------|---------------------------|
| 235 | $\alpha$ -OH | $\beta$ -CH <sub>3</sub>  |
| 236 | =O           | $\alpha$ -CH <sub>3</sub> |

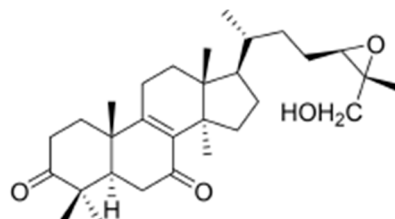

| Cpd | R1           | R2                        |
|-----|--------------|---------------------------|
| 235 | $\alpha$ -OH | $\beta$ -CH <sub>3</sub>  |
| 236 | =O           | $\alpha$ -CH <sub>3</sub> |

Figure S15 Structures of compounds 232-234      Figure S16 Structures of compounds 235-236

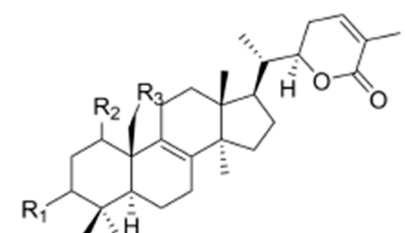

| Cpd | R1          | R2          | R3              |
|-----|-------------|-------------|-----------------|
| 237 | $\beta$ -OH | H           | OAc             |
| 238 | =O          | H           | H               |
| 239 | $\beta$ -OH | H           | CH <sub>3</sub> |
| 240 | $\beta$ -OH | $\beta$ -OH | CH <sub>3</sub> |

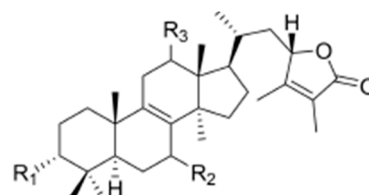

| Cpd | R1 | R2 | R3          |
|-----|----|----|-------------|
| 241 |    | H  | $\beta$ -OH |
| 242 |    | =O | $\beta$ -OH |
| 243 | H  | H  | $\beta$ -OH |
| 244 | OH | H  | H           |

Figure S16 Structures of compounds 237-240      Figure S17 Structures of compounds 241-244

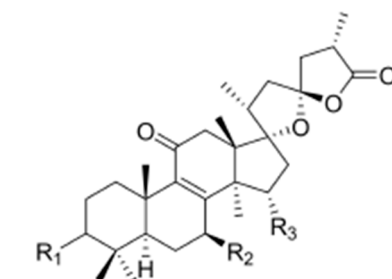

| Cpd | R1          | R2          | R3           |
|-----|-------------|-------------|--------------|
| 245 | =O          | H           | H            |
| 246 | =O          | OH          | OH           |
| 247 | =O          | H           | OAc          |
| 248 | =O          | OAc         | OH           |
| 249 | $\beta$ -OH | $\beta$ -OH | $\alpha$ -OH |

Figure S18 Structures of compounds 245-249



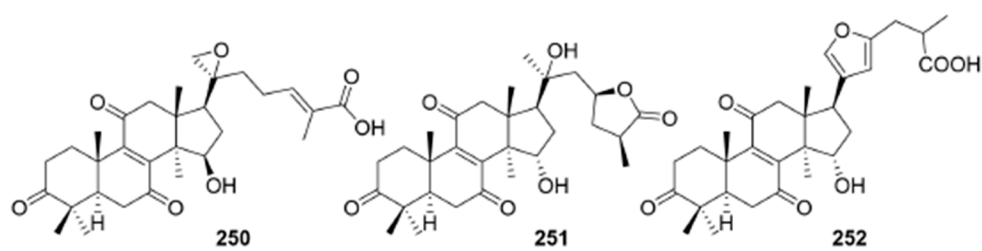

Figure S19 Structures of compounds 250-252

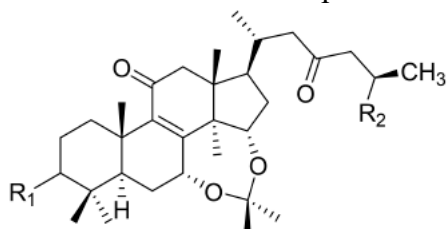

| Cpd | R1          | R2                 |
|-----|-------------|--------------------|
| 253 | $\beta$ -OH | COOH               |
| 254 | =O          | COOCH <sub>3</sub> |

Figure S20 Structures of compounds 253-254

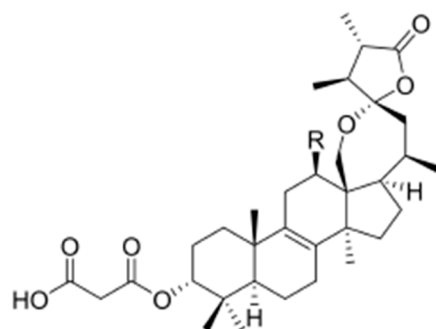

| Cpd | R  |
|-----|----|
| 255 | OH |
| 256 | H  |

Figure S21 Structures of compounds 255-256



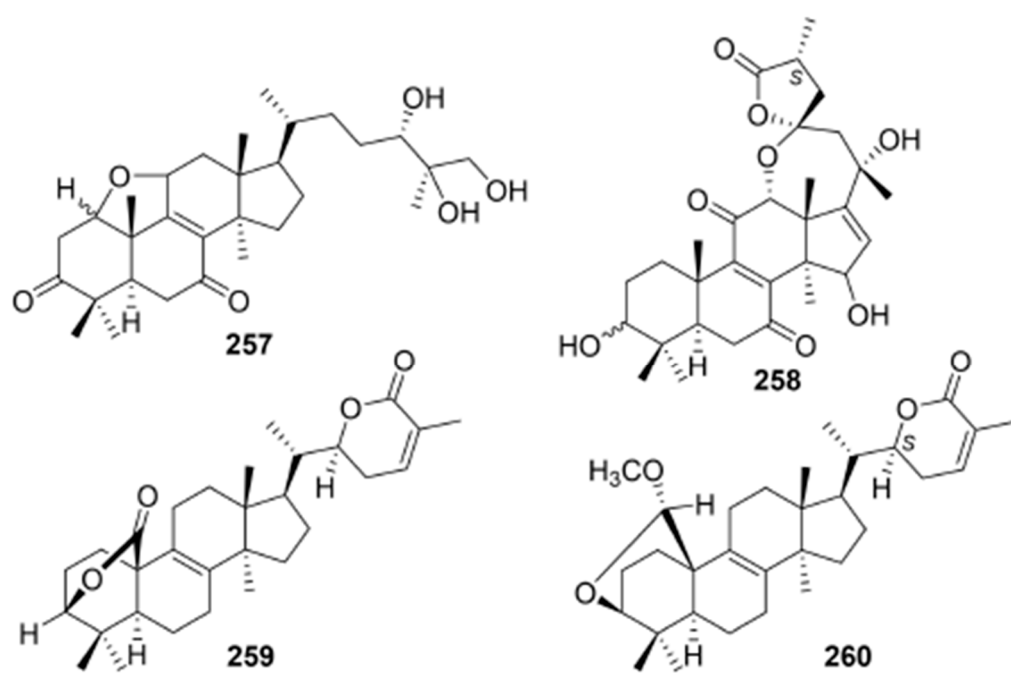

Figure S22 Structures of compounds 257-260

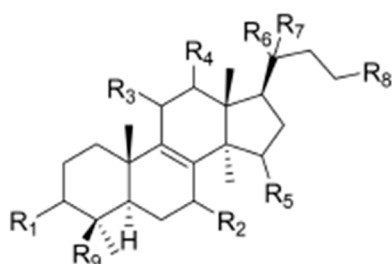

Figure S23 Chemical structure of compound 261-301  
Table S15 Chemical Structures of compounds 261-301



| Cpd | R1             | R2          | R3 | R4            | R5           | R6                        | R7               | R8                 | R9                 |
|-----|----------------|-------------|----|---------------|--------------|---------------------------|------------------|--------------------|--------------------|
| 261 | $\beta$ -OH    | $\beta$ -OH | =O | H             | =O           | $\alpha$ -CH <sub>3</sub> | H                | COOBu              | CH <sub>3</sub>    |
| 262 | =O             | $\beta$ -OH | =O | H             | =O           | $\alpha$ -CH <sub>3</sub> | H                | COOBu              | CH <sub>3</sub>    |
| 263 | $\beta$ -OH    | $\beta$ -OH | =O | H             | =O           | =CH <sub>2</sub>          | $\Delta^{20,21}$ | COOH               | CH <sub>3</sub>    |
| 264 | =O             | $\beta$ -OH | =O | H             | =O           | $\beta$ -CH <sub>3</sub>  | $\xi$ -OH        | COOH               | CH <sub>3</sub>    |
| 265 | =O             | =O          | =O | $\beta$ -O-Ac | =O           | $\beta$ -CH <sub>3</sub>  | H                | COOCH <sub>3</sub> | CH <sub>3</sub>    |
| 266 | =O             | $\beta$ -OH | =O | H             | =O           | =CH <sub>2</sub>          | $\Delta^{20,21}$ | COOH               | CH <sub>3</sub>    |
| 267 | =O             | $\beta$ -OH | =O | H             | =O           | =CH <sub>2</sub>          | $\Delta^{20,21}$ | COOCH <sub>3</sub> | CH <sub>3</sub>    |
| 268 | $\beta$ -OH    | $\beta$ -OH | =O | H             | =O           | $\alpha$ -CH <sub>3</sub> | H                | COOH               | CH <sub>3</sub>    |
| 269 | =O             | =O          | =O | $\beta$ -O-Ac | =O           | $\beta$ -CH <sub>3</sub>  | H                | COOH               | CH <sub>3</sub>    |
| 270 | $\beta$ -OH    | =O          | =O | $\beta$ -O-Ac | =O           | $\beta$ -CH <sub>3</sub>  | H                | COOCH <sub>3</sub> | CH <sub>3</sub>    |
| 271 | =O             | =O          | =O | H             | =O           | $\beta$ -CH <sub>3</sub>  | H                | COOCH <sub>3</sub> | CH <sub>3</sub>    |
| 272 | =O             | OH          | =O | H             | =O           | $\alpha$ -CH <sub>3</sub> | H                | COOEt              | CH <sub>3</sub>    |
| 273 | $\beta$ -O-CHO | $\beta$ -OH | =O | OH            | =O           | $\beta$ -CH <sub>3</sub>  | H                | COOH               | CH <sub>3</sub>    |
| 274 | =O             | $\beta$ -OH | =O | H             | =O           | $\beta$ -CH <sub>3</sub>  | H                | COOH               | CH <sub>3</sub>    |
| 275 | =O             | $\beta$ -OH | =O | $\beta$ -OH   | =O           | $\beta$ -CH <sub>3</sub>  | H                | COOH               | CH <sub>3</sub>    |
| 276 | $\beta$ -OH    | $\beta$ -OH | =O | $\beta$ -OH   | =O           | $\beta$ -CH <sub>3</sub>  | H                | COOH               | CH <sub>3</sub>    |
| 277 | =O             | =O          | H  | H             | H            | $\alpha$ -CH <sub>3</sub> | H                | COOH               | CH <sub>3</sub>    |
| 278 | $\beta$ -OH    | $\beta$ -OH | =O | $\beta$ -O-Ac | =O           | $\alpha$ -CH <sub>3</sub> | H                | COOH               | CH <sub>3</sub>    |
| 279 | $\beta$ -OH    | $\beta$ -OH | =O | $\beta$ -O-Ac | =O           | $\alpha$ -CH <sub>3</sub> | H                | COOCH <sub>3</sub> | CH <sub>3</sub>    |
| 280 | =O             | $\beta$ -OH | =O | H             | $\alpha$ -OH | $\alpha$ -CH <sub>3</sub> | H                | COOCH <sub>3</sub> | CH <sub>3</sub>    |
| 281 | $\beta$ -OH    | =O          | =O | H             | =O           | $\alpha$ -CH <sub>3</sub> | H                | COOH               | CH <sub>3</sub>    |
| 282 | =O             | =O          | =O | $\beta$ -O-Ac | =O           | $\beta$ -CH <sub>3</sub>  | H                | COOCH <sub>3</sub> | CH <sub>3</sub>    |
| 283 | $\beta$ -OH    | =O          | =O | $\beta$ -O-Ac | =O           | $\beta$ -CH <sub>3</sub>  | H                | COOCH <sub>3</sub> | CH <sub>3</sub>    |
| 284 | $\beta$ -OH    | $\beta$ -OH | =O | H             | =O           | $\alpha$ -CH <sub>3</sub> | H                | COOCH <sub>3</sub> | CH <sub>3</sub>    |
| 285 | =O             | $\beta$ -OH | =O | $\beta$ -OH   | =O           | $\alpha$ -CH <sub>3</sub> | H                | COOBu              | CH <sub>3</sub>    |
| 286 | =O             | $\beta$ -OH | =O | H             | =O           | $\alpha$ -CH <sub>3</sub> | H                | COOCH <sub>3</sub> | CH <sub>3</sub>    |
| 287 | =O             | =O          | =O | $\beta$ -O-Ac | =O           | $\alpha$ -CH <sub>3</sub> | H                | COOH               | CH <sub>3</sub>    |
| 288 | =O             | =O          | =O | $\beta$ -O-Ac | =O           | $\beta$ -CH <sub>3</sub>  | $\xi$ -OH        | COOH               | CH <sub>3</sub>    |
| 289 | =O             | =O          | =O | H             | =O           | $\beta$ -CH <sub>3</sub>  | $\xi$ -OH        | COOH               | CH <sub>3</sub>    |
| 290 | $\beta$ -OH    | =O          | =O | $\beta$ -O-Ac | =O           | $\beta$ -CH <sub>3</sub>  | $\xi$ -OH        | COOH               | CH <sub>3</sub>    |
| 291 | $\beta$ -OH    | $\beta$ -OH | =O | H             | =O           | $\beta$ -CH <sub>3</sub>  | $\xi$ -OH        | COOH               | CH <sub>3</sub>    |
| 292 | $\beta$ -OH    | $\beta$ -OH | =O | $\beta$ -O-Ac | =O           | $\beta$ -CH <sub>3</sub>  | $\xi$ -OH        | COOH               | CH <sub>3</sub>    |
| 293 | =O             | =O          | =O | H             | =O           | $\alpha$ -CH <sub>3</sub> | H                | COOH               | CH <sub>3</sub>    |
| 294 | $\beta$ -OH    | $\beta$ -OH | =O | H             | =O           | $\alpha$ -CH <sub>3</sub> | H                | COOCH <sub>3</sub> | CH <sub>3</sub>    |
| 295 | $\beta$ -OH    | =O          | =O | $\beta$ -O-Ac | =O           | $\alpha$ -CH <sub>3</sub> | H                | COOH               | CH <sub>3</sub>    |
| 296 | =O             | $\beta$ -OH | =O | H             | =O           | $\alpha$ -CH <sub>3</sub> | H                | COOH               | CH <sub>3</sub>    |
| 297 | $\beta$ -OH    | $\beta$ -OH | =O | H             | =O           | $\beta$ -CH <sub>3</sub>  | H                | CH <sub>3</sub>    | CH <sub>2</sub> OH |
| 298 | $\beta$ -OH    | =O          | =O | H             | =O           | $\beta$ -CH <sub>3</sub>  | H                | CH <sub>3</sub>    | CH <sub>2</sub> OH |
| 299 | $\beta$ -OH    | =O          | =O | H             | =O           | $\beta$ -CH <sub>3</sub>  | H                | CH <sub>3</sub>    | CH <sub>2</sub> OH |
| 300 | $\beta$ -OH    | $\beta$ -OH | =O | H             | =O           | $\alpha$ -CH <sub>3</sub> | H                | CH <sub>3</sub>    | CH <sub>2</sub> OH |
| 301 | =O             | =O          | =O | H             | =O           | =CH <sub>2</sub>          | $\Delta^{20,21}$ | COOCH <sub>3</sub> | CH <sub>3</sub>    |



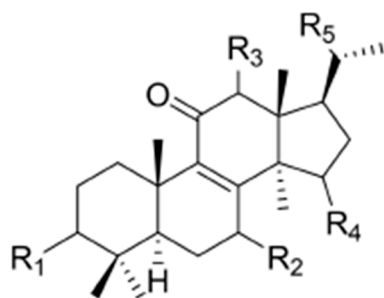

| Cpd | R1          | R2          | R3                 | R4           | R5                 |
|-----|-------------|-------------|--------------------|--------------|--------------------|
| 302 | OH          | OH          | H                  | =O           | =O                 |
| 303 | OH          | OH          | H                  | =O           | OH                 |
| 304 | $\beta$ -OH | $\beta$ -OH | H                  | $\alpha$ -OH | CH <sub>2</sub> OH |
| 305 | OH          | $\beta$ -OH | COOCH <sub>3</sub> | =O           | =O                 |
| 306 | OH          | =O          | COOCH <sub>3</sub> | =O           | =O                 |
| 307 | OAc         | =O          | H                  | $\alpha$ -OH | =O                 |

Figure S24 Structures of compounds 302-307

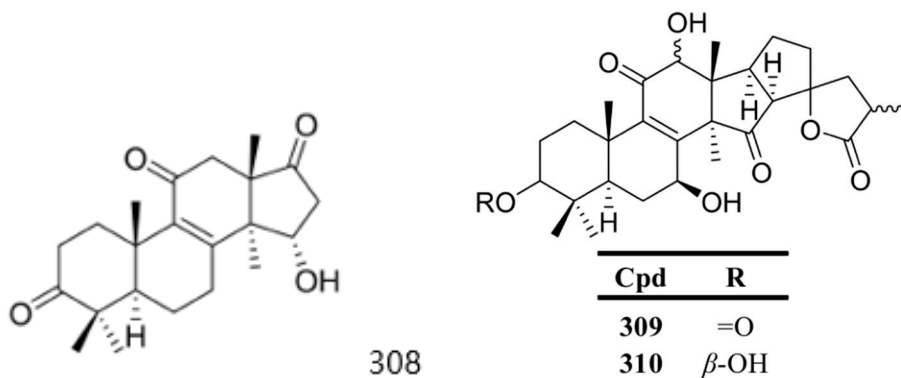

Figure S25 Structures of compounds 309-310

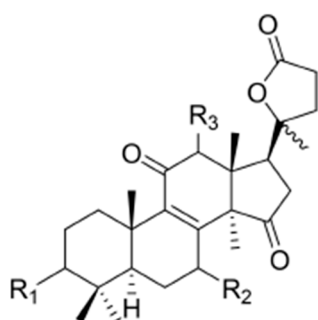

| Cpd | R1          | R2          | R3            |
|-----|-------------|-------------|---------------|
| 311 | =O          | $\beta$ -OH | $\alpha$ -OH  |
| 312 | =O          | $\beta$ -OH | H             |
| 313 | =O          | =O          | H             |
| 314 | =O          | =O          | $\beta$ -O-Ac |
| 315 | $\beta$ -OH | $\beta$ -OH | $\beta$ -OH   |
| 316 | $\beta$ -OH | $\beta$ -OH | =O            |
| 317 | $\beta$ -OH | $\beta$ -OH | H             |

Figure S26 Structures of compounds 311-317



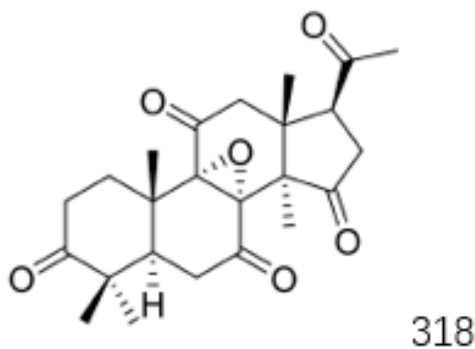

Figure S27 Structures of compound 318

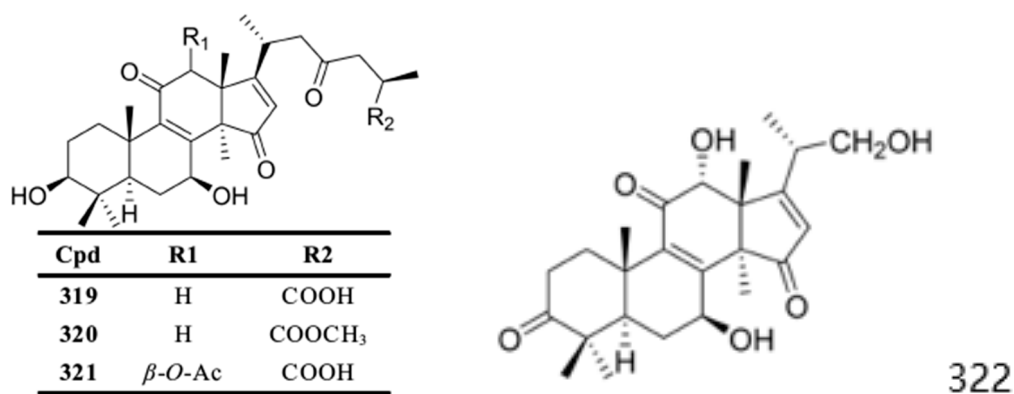

Figure S28 Structures of compounds 319-322

| Cpd | R1             | R2             | R3           | R4                        | R5            | R6 | R7                  | R8                 | R9                 | R10 |
|-----|----------------|----------------|--------------|---------------------------|---------------|----|---------------------|--------------------|--------------------|-----|
| 323 | =O             | H              | H            | $\beta$ -CH <sub>3</sub>  | H             | H  | H, $\Delta^{24,25}$ | CHO                | CH <sub>3</sub>    | -   |
| 324 | =O             | H              | H            | $\beta$ -CH <sub>3</sub>  | H             | H  | H, $\Delta^{24,25}$ | CH <sub>2</sub> OH | CH <sub>3</sub>    | -   |
| 325 | =O             | $\alpha$ -OH   | H            | $\beta$ -CH <sub>3</sub>  | H             | H  | H, $\Delta^{24,25}$ | COOH               | CH <sub>3</sub>    | -   |
| 326 | $\alpha$ -OH   | H              | $\alpha$ -OH | $\alpha$ -COOH            | H             | H  | H, $\Delta^{24,25}$ | CH <sub>3</sub>    | CH <sub>3</sub>    | -   |
| 327 | $\alpha$ -OH   | H              | $\alpha$ -OH | $\alpha$ -COOH            | H             | H  | H, $\Delta^{24,25}$ | CH <sub>2</sub> OH | CH <sub>3</sub>    | -   |
| 328 | =O             | H              | H            | $\alpha$ -CH <sub>3</sub> | H             | H  | H, $\Delta^{24,25}$ | COOH               | CH <sub>3</sub>    | -   |
| 329 | =O             | H              | H            | $\beta$ -CH <sub>3</sub>  | H             | H  | H, $\Delta^{24,25}$ | COOH               | CH <sub>3</sub>    | -   |
| 330 | =O             | $\alpha$ -OH   | H            | $\alpha$ -CH <sub>3</sub> | H             | H  | H, $\Delta^{24,25}$ | CH <sub>2</sub> OH | CH <sub>3</sub>    | -   |
| 331 | $\alpha$ -O-Ac | $\alpha$ -O-Ac | H            | $\beta$ -CH <sub>3</sub>  | H             | H  | H, $\Delta^{24,25}$ | COOH               | CH <sub>3</sub>    | -   |
| 332 | $\beta$ -O-Ac  | $\alpha$ -OH   | H            | $\beta$ -CH <sub>3</sub>  | H             | H  | H, $\Delta^{24,25}$ | COOH               | CH <sub>3</sub>    | -   |
| 333 | =O             | H              | H            | $\alpha$ -CH <sub>3</sub> | H             | H  | H, $\Delta^{24,25}$ | CH <sub>2</sub> OH | CH <sub>3</sub>    | -   |
| 334 | $\beta$ -OH    | H              | H            | $\alpha$ -CH <sub>3</sub> | H             | H  | H, $\Delta^{24,25}$ | CH <sub>2</sub> OH | CH <sub>3</sub>    | -   |
| 335 | $\beta$ -OH    | H              | H            | $\alpha$ -CH <sub>3</sub> | H             | H  | H, $\Delta^{24,25}$ | CH <sub>2</sub> OH | CH <sub>2</sub> OH | -   |
| 336 | $\beta$ -O-Ac  | $\alpha$ -O-Ac | H            | $\beta$ -CH <sub>3</sub>  | H             | H  | H, $\Delta^{24,25}$ | COOH               | CH <sub>3</sub>    | -   |
| 337 | =O             | H              | =O           | $\beta$ -CH <sub>3</sub>  | H             | H  | H, $\Delta^{24,25}$ | CH <sub>2</sub> OH | CH <sub>2</sub> OH | -   |
| 338 | $\beta$ -OH    | H              | H            | $\beta$ -CH <sub>3</sub>  | H             | H  | H, $\Delta^{24,25}$ | CH <sub>2</sub> OH | CH <sub>3</sub>    | -   |
| 339 | $\alpha$ -O-Ac | $\alpha$ -OH   | H            | $\beta$ -CH <sub>3</sub>  | $\beta$ -O-Ac | H  | H, $\Delta^{24,25}$ | COOH               | CH <sub>3</sub>    | -   |
| 340 | =O             | $\alpha$ -OH   | H            | $\alpha$ -CH <sub>3</sub> | H             | H  | H, $\Delta^{24,25}$ | CH <sub>2</sub> OH | CH <sub>2</sub> OH | -   |
| 341 | $\alpha$ -O-Ac | $\alpha$ -O-Ac | H            | $\alpha$ -CH <sub>3</sub> | $\beta$ -O-Ac | H  | H, $\Delta^{24,25}$ | COOH               | CH <sub>3</sub>    | -   |



| Cpd | R1             | R2             | R3           | R4                                       | R5                  | R6                  | R7                  | R8                         | R9                    | R10                        |
|-----|----------------|----------------|--------------|------------------------------------------|---------------------|---------------------|---------------------|----------------------------|-----------------------|----------------------------|
| 342 | $\alpha$ -OH   | H              | H            | $\alpha$ -CH <sub>3</sub>                | $\beta$ -O-Ac       | H                   | H, $\Delta^{24,25}$ | COOH                       | CH <sub>3</sub>       | -                          |
| 343 | $\alpha$ -O-Ac | H              | H            | $\alpha$ -CH <sub>3</sub>                | $\beta$ -O-Ac       | H                   | H, $\Delta^{24,25}$ | COOH                       | CH <sub>3</sub>       | -                          |
| 344 | =O             | H              | H            | $\alpha$ -CH <sub>3</sub>                | $\beta$ -O-Ac       | H                   | H, $\Delta^{24,25}$ | COOH                       | CH <sub>3</sub>       | -                          |
| 345 | $\beta$ -O-Ac  | $\alpha$ -O-Ac | H            | $\beta$ -CH <sub>3</sub>                 | $\beta$ -O-Ac       | H                   | H, $\Delta^{24,25}$ | COOH                       | CH <sub>3</sub>       | -                          |
| 346 | $\alpha$ -OH   | $\alpha$ -O-Ac | H            | $\beta$ -CH <sub>3</sub>                 | H                   | =O                  | H, $\Delta^{24,25}$ | COOH                       | CH <sub>3</sub>       | -                          |
| 347 | $\alpha$ -O-Ac | $\alpha$ -O-Ac | H            | $\beta$ -CH <sub>3</sub>                 | H                   | =O                  | H, $\Delta^{24,25}$ | COOH                       | CH <sub>3</sub>       | -                          |
| 348 | $\alpha$ -O-Ac | $\alpha$ -OH   | H            | $\beta$ -CH <sub>3</sub>                 | H                   | =O                  | H, $\Delta^{24,25}$ | COOH                       | CH <sub>3</sub>       | -                          |
| 349 | $\alpha$ -O-Ac | $\alpha$ -OH   | H            | $\beta$ -CH <sub>3</sub>                 | H                   | H                   | H, $\Delta^{24,25}$ | COOH                       | CH <sub>3</sub>       | -                          |
| 350 | $\beta$ -OH    | $\alpha$ -O-Ac | H            | $\beta$ -CH <sub>3</sub>                 | H                   | H                   | H, $\Delta^{24,25}$ | COOH                       | CH <sub>3</sub>       | -                          |
| 351 | $\beta$ -O-Ac  | $\alpha$ -OH   | H            | $\beta$ -CH <sub>3</sub>                 | H                   | H                   | H, $\Delta^{24,25}$ | COOH                       | CH <sub>3</sub>       | -                          |
| 352 | =O             | $\alpha$ -O-Ac | H            | $\beta$ -CH <sub>3</sub>                 | H                   | H                   | H, $\Delta^{24,25}$ | COOH                       | CH <sub>3</sub>       | -                          |
| 353 | =O             | $\alpha$ -O-Ac | H            | $\alpha$ -CH <sub>3</sub>                | $\beta$ -O-Ac       | H                   | H, $\Delta^{24,25}$ | COOH                       | CH <sub>3</sub>       | -                          |
| 354 | $\alpha$ -OH   | $\alpha$ -O-Ac | H            | $\alpha$ -CH <sub>3</sub>                | $\beta$ -O-Ac       | H                   | H, $\Delta^{24,25}$ | COOH                       | CH <sub>3</sub>       | -                          |
| 355 | $\alpha$ -O-Ac | $\alpha$ -OH   | H            | $\alpha$ -CH <sub>3</sub>                | $\beta$ -O-Ac       | H                   | H, $\Delta^{24,25}$ | COOH                       | CH <sub>3</sub>       | -                          |
| 356 | =O             | $\alpha$ -OH   | H            | $\alpha$ -CH <sub>3</sub>                | H                   | OH                  | H, $\Delta^{24,25}$ | COOH                       | CH <sub>3</sub>       | -                          |
| 357 | $\beta$ -OH    | $\alpha$ -OH   | H            | $\alpha$ -CH <sub>3</sub>                | H                   | H                   | H, $\Delta^{24,25}$ | CH <sub>2</sub> OH         | CH <sub>2</sub> OH    | -                          |
| 358 | $\beta$ -OH    | H              | H            | $\alpha$ -CH <sub>3</sub>                | H                   | H                   | H, $\Delta^{24,25}$ | CHO                        | CH <sub>3</sub>       | -                          |
| 359 | =O             | H              | H            | $\beta$ -CH <sub>3</sub>                 | H                   | H                   | H, $\Delta^{24,25}$ | CH <sub>2</sub> OH         | CH <sub>2</sub> OH    | -                          |
| 360 | =O             | H              | H            | $\alpha$ -CH <sub>3</sub>                | =O                  | H                   | H, $\Delta^{24,25}$ | CH <sub>2</sub> OH         | CH <sub>2</sub> OH    | -                          |
| 361 | =O             | H              | H            | $\alpha$ -CH <sub>3</sub>                | =O                  | H                   | H, $\Delta^{24,25}$ | CH <sub>2</sub> OH         | CH <sub>3</sub>       | -                          |
| 362 | $\alpha$ -O-Ac | $\alpha$ -OH   | H            | $\beta$ -CH <sub>3</sub>                 | $\beta$ -O-Ac       | H                   | H, $\Delta^{24,25}$ | COOH                       | CH <sub>3</sub>       | -                          |
| 363 | $\beta$ -OH    | $\alpha$ -O-Ac | H            | $\beta$ -CH <sub>3</sub>                 | $\beta$ -O-Ac       | H                   | H, $\Delta^{24,25}$ | COOH                       | CH <sub>3</sub>       | -                          |
| 364 | $\beta$ -O-Ac  | $\alpha$ -O-Ac | H            | $\alpha$ -CH <sub>3</sub>                | $\beta$ -O-Ac       | H                   | H, $\Delta^{24,25}$ | COOH                       | CH <sub>3</sub>       | -                          |
| 365 | =O             | H              | $\alpha$ -OH | $\alpha$ -COOH                           | H                   | H                   | H, $\Delta^{24,25}$ | CH <sub>3</sub>            | CH <sub>3</sub>       | -                          |
| 366 | =O             | $\alpha$ -OH   | H            | $\alpha$ -CH <sub>3</sub> ( $\beta$ -OH) | H                   | H                   | H, $\Delta^{24,25}$ | COOH                       | CH <sub>3</sub>       | -                          |
| 367 | $\beta$ -OH    | H              | H            | $\alpha$ -OH( $\beta$ -CH <sub>3</sub> ) | H                   | H                   | H, $\Delta^{24,25}$ | COOH                       | CH <sub>3</sub>       | -                          |
| 368 | $\alpha$ -OH   | $\alpha$ -OH   | H            | CH <sub>3</sub>                          | $\alpha$ -OH        | H                   | H, $\Delta^{24,25}$ | COOH                       | CH <sub>3</sub>       | -                          |
| 369 | $\beta$ -OH    | $\alpha$ -OH   | H            | $\alpha$ -CH <sub>3</sub> ( $\beta$ -OH) | $\beta$ -OH         | H                   | H, $\Delta^{24,25}$ | COOH                       | CH <sub>3</sub>       | -                          |
| 370 | $\alpha$ -O-Ac | $\alpha$ -O-Ac | H            | CH <sub>3</sub>                          | $\alpha$ -OH        | H                   | H, $\Delta^{24,25}$ | COOH                       | CH <sub>3</sub>       | -                          |
| 371 | $\beta$ -O-Ac  | $\alpha$ -O-Ac | H            | CH <sub>3</sub>                          | $\alpha$ -OH        | H                   | H, $\Delta^{24,25}$ | COOH                       | CH <sub>3</sub>       | -                          |
| 372 | $\alpha$ -OH   | $\alpha$ -OH   | H            | CH <sub>3</sub>                          | $\beta$ -O-Ac       | H                   | H, $\Delta^{24,25}$ | COOH                       | CH <sub>3</sub>       | -                          |
| 373 | $\beta$ -OH    | $\alpha$ -OH   | H            | CH <sub>3</sub>                          | $\beta$ -O-Ac       | H                   | H, $\Delta^{24,25}$ | COOH                       | CH <sub>3</sub>       | -                          |
| 374 | =O             | $\alpha$ -OH   | H            | $\alpha$ -CH <sub>3</sub>                | H                   | H                   | H, $\Delta^{24,25}$ | COOH                       | CH <sub>3</sub>       | -                          |
| 375 | $\alpha$ -OH   | $\alpha$ -OH   | H            | $\beta$ -CH <sub>3</sub>                 | H                   | H                   | H, $\Delta^{24,25}$ | COOH                       | CH <sub>3</sub>       | -                          |
| 376 | $\beta$ -OH    | $\alpha$ -OH   | H            | $\beta$ -CH <sub>3</sub>                 | H                   | H                   | H, $\Delta^{24,25}$ | COOH                       | CH <sub>3</sub>       | -                          |
| 377 | $\alpha$ -O-Ac | $\alpha$ -O-Ac | H            | $\beta$ -CH <sub>3</sub>                 | H                   | H                   | H, $\Delta^{24,25}$ | COOH                       | CH <sub>3</sub>       | -                          |
| 378 | =O             | H              | H            | $\alpha$ -CH <sub>3</sub>                | $\beta$ -OH         | H                   | H, $\Delta^{24,25}$ | COOH                       | CH <sub>3</sub>       | -                          |
| 379 | =O             | $\alpha$ -OH   | H            | $\alpha$ -CH <sub>3</sub>                | H                   | H                   | H, $\Delta^{24,25}$ | CH <sub>2</sub> OH         | CH <sub>3</sub>       | -                          |
| 380 | $\beta$ -OH    | H              | H            | $\alpha$ -CH <sub>3</sub>                | H                   | H                   | H, $\Delta^{24,25}$ | COOH                       | CH <sub>3</sub>       | -                          |
| 381 | $\beta$ -O-Ac  | H              | H            | $\alpha$ -CH <sub>3</sub>                | H                   | H                   | H, $\Delta^{24,25}$ | COOH                       | CH <sub>3</sub>       | -                          |
| 382 | $\beta$ -O-Ac  | H              | H            | $\alpha$ -CH <sub>3</sub>                | $\beta$ -O-Ac       | H                   | H, $\Delta^{24,25}$ | COOH                       | CH <sub>3</sub>       | -                          |
| 383 | $\beta$ -O-Ac  | H              | H            | $\alpha$ -CH <sub>3</sub>                | $\beta$ -O-Ac       | H                   | H, $\Delta^{24,25}$ | COOH                       | CH <sub>3</sub>       | -                          |
| 384 | =O             | $\alpha$ -O-Ac | H            | $\alpha$ -CH <sub>3</sub>                | H                   | H                   | $\alpha$ -OH        | $\beta$ -OH                | CH <sub>3</sub>       | CH <sub>2</sub> OH         |
| 385 | =O             | H              | H            | $\alpha$ -CH <sub>3</sub>                | H                   | H                   | $\alpha$ -OH        | $\beta$ -O-CH <sub>3</sub> | CH <sub>3</sub>       | CH <sub>2</sub> OH         |
| 386 | $\beta$ -OH    | $\alpha$ -OH   | H            | $\alpha$ -CH <sub>3</sub>                | H, $\Delta^{22,23}$ | H, $\Delta^{22,23}$ | H, $\Delta^{24,25}$ | COOH                       | CH <sub>3</sub>       | -                          |
| 387 | $\beta$ -OH    | $\alpha$ -OH   | H            | $\alpha$ -CH <sub>3</sub>                | H, $\Delta^{20,22}$ | =O                  | H                   | COOH                       | CH <sub>3</sub>       | -                          |
| 388 | =O             | H              | H            | $\alpha$ -CH <sub>3</sub>                | H                   | H                   | $\alpha$ -OH        | CH <sub>3</sub>            | CH <sub>2</sub> OH    | OH                         |
| 389 | $\beta$ -OH    | H              | H            | $\alpha$ -CH <sub>3</sub>                | H                   | H                   | $\alpha$ -OH        | CH <sub>3</sub>            | CH <sub>2</sub> OH    | $\beta$ -O-CH <sub>3</sub> |
| 390 | $\beta$ -O-Ac  | H              | H            | $\alpha$ -CH <sub>3</sub>                | H                   | H                   | OAc                 | CH <sub>3</sub>            | CH <sub>2</sub> -O-Ac | OH                         |
| 391 | $\beta$ -OH    | H              | H            | $\alpha$ -CH <sub>3</sub>                | H                   | H                   | $\alpha$ -OH        | CH <sub>3</sub>            | CH <sub>3</sub>       | OH                         |
| 392 | =O             | H              | H            | $\beta$ -CH <sub>3</sub>                 | H                   | H                   | $\alpha$ -OH        | CH <sub>3</sub>            | CH <sub>2</sub> OH    | H                          |
| 393 | $\beta$ -OH    | H              | H            | $\alpha$ -CH <sub>3</sub>                | H                   | H                   | OH                  | CH <sub>3</sub>            | CH <sub>2</sub> OH    | OH                         |
| 394 | =O             | H              | H            | $\alpha$ -CH <sub>3</sub>                | H                   | H                   | OH                  | CH <sub>3</sub>            | CH <sub>3</sub>       | OH                         |
| 395 | $\beta$ -OH    | $\alpha$ -O-Ac | H            | $\beta$ -CH <sub>3</sub>                 | H                   | H                   | H                   | CH <sub>3</sub>            | COOH                  | H                          |

Figure S29 Structures of compound 261-301  
Table S16 Structures of compounds 261-301







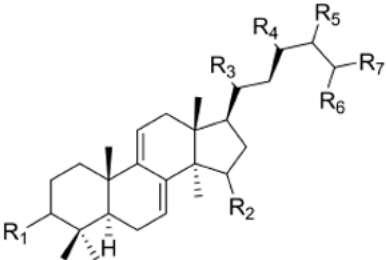

| Cpd | R1             | R2             | R3                        | R4                  | R5                  | R6                  | R7                 |
|-----|----------------|----------------|---------------------------|---------------------|---------------------|---------------------|--------------------|
| 411 | $\beta$ -OH    | H              | $\alpha$ -CH <sub>3</sub> | H                   | H, $\Delta^{24,25}$ | H, $\Delta^{24,25}$ | CHO                |
| 412 | =O             | H              | $\beta$ -CH <sub>3</sub>  | H                   | H, $\Delta^{24,25}$ | H, $\Delta^{24,25}$ | CHO                |
| 413 | =O             | H              | $\beta$ -CH <sub>3</sub>  | H                   | H, $\Delta^{24,25}$ | H, $\Delta^{24,25}$ | CH <sub>2</sub> OH |
| 414 | =O             | $\alpha$ -OH   | $\alpha$ -CH <sub>3</sub> | H                   | H, $\Delta^{24,25}$ | H, $\Delta^{24,25}$ | COOH               |
| 415 | $\alpha$ -OH   | $\alpha$ -OH   | $\beta$ -CH <sub>3</sub>  | H                   | H, $\Delta^{24,25}$ | H, $\Delta^{24,25}$ | COOH               |
| 416 | $\beta$ -OH    | $\alpha$ -OH   | $\beta$ -CH <sub>3</sub>  | H                   | H, $\Delta^{24,25}$ | H, $\Delta^{24,25}$ | COOH               |
| 417 | $\alpha$ -O-Ac | $\alpha$ -O-Ac | $\beta$ -CH <sub>3</sub>  | H                   | H, $\Delta^{24,25}$ | H, $\Delta^{24,25}$ | COOH               |
| 418 | =O             | $\alpha$ -OH   | $\alpha$ -CH <sub>3</sub> | H                   | H, $\Delta^{24,25}$ | H, $\Delta^{24,25}$ | COOH               |
| 419 | =O             | $\alpha$ -OH   | $\alpha$ -CH <sub>3</sub> | H                   | H, $\Delta^{24,25}$ | H, $\Delta^{24,25}$ | CH <sub>2</sub> OH |
| 420 | $\beta$ -OH    | H              | $\alpha$ -CH <sub>3</sub> | H                   | H, $\Delta^{24,25}$ | H, $\Delta^{24,25}$ | COOH               |
| 421 | =O             | H              | $\alpha$ -CH <sub>3</sub> | H                   | H, $\Delta^{24,25}$ | CH <sub>2</sub> OH  | CH <sub>3</sub>    |
| 422 | $\beta$ -OH    | H              | $\alpha$ -CH <sub>3</sub> | H, $\Delta^{23,24}$ | H, $\Delta^{24,25}$ | =O                  | CH <sub>3</sub>    |

Figure S34 Structures of compounds 411-422

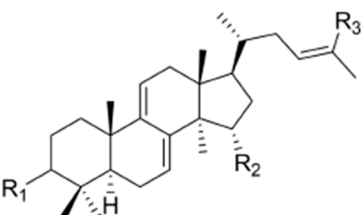


| Cpd | R1           | R2 | R3                 |
|-----|--------------|----|--------------------|
| 423 | $\alpha$ -OH | H  | COOH               |
| 424 | =O           | H  | CH <sub>2</sub> OH |
| 425 | $\beta$ -OH  | H  | COOH               |

| Cpd | R1 | R2           |
|-----|----|--------------|
| 426 | =O | H            |
| 427 | =O | $\alpha$ -OH |

Figure S35 Structures of compounds 423-427

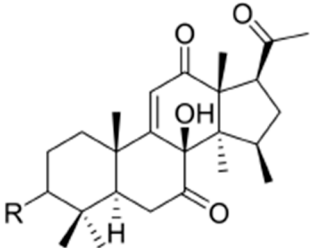


| Cpd | R           |
|-----|-------------|
| 428 | $\beta$ -OH |
| 429 | =O          |

| Cpd | R1          | R2          |
|-----|-------------|-------------|
| 430 | =O          | =O          |
| 431 | $\beta$ -OH | $\beta$ -OH |

Figure S36 Structures of compounds 428-431



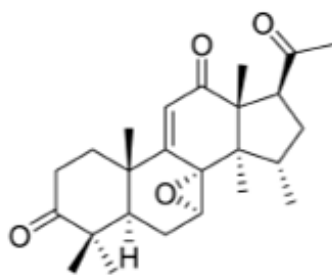

432

Figure S37 Structures of compound 432

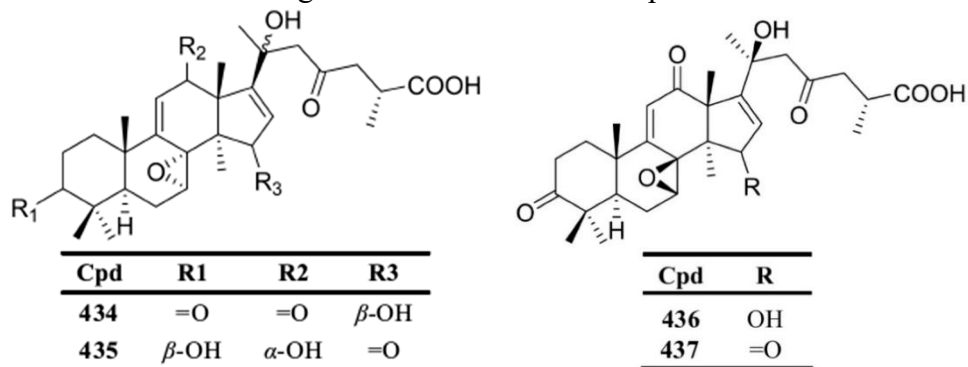

Figure S38 Structures of compounds 434-437

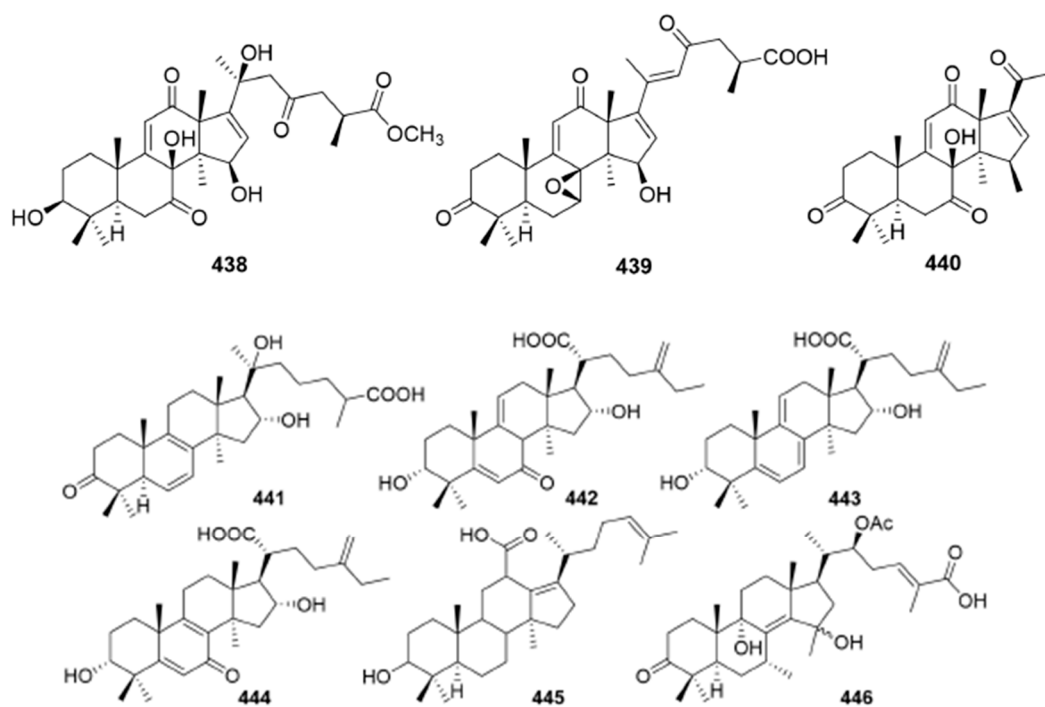

Figure S39 Structures of compounds 438-446







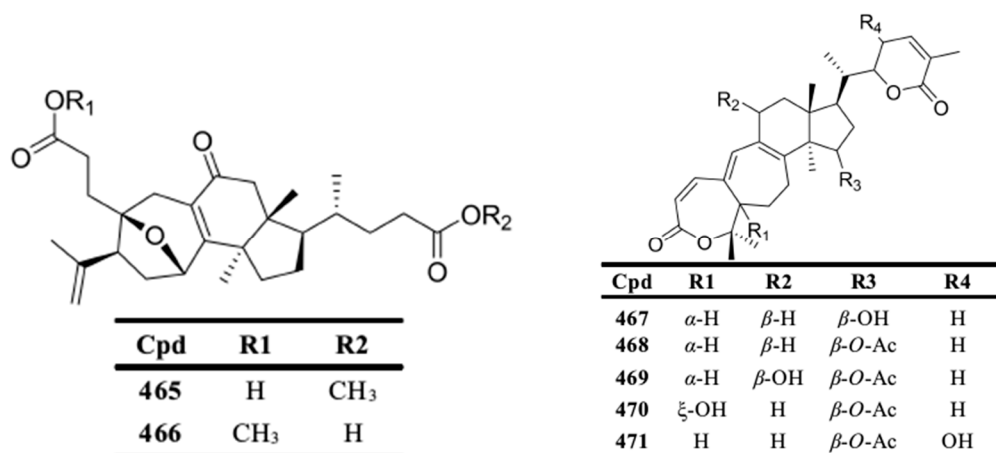

Figure S44 Structures of compounds 465-471

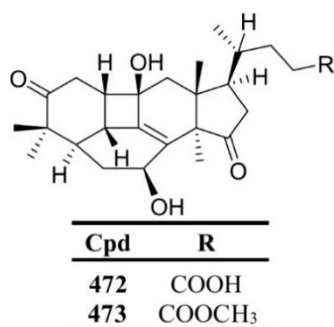

Figure S45 Structures of compounds 472-473

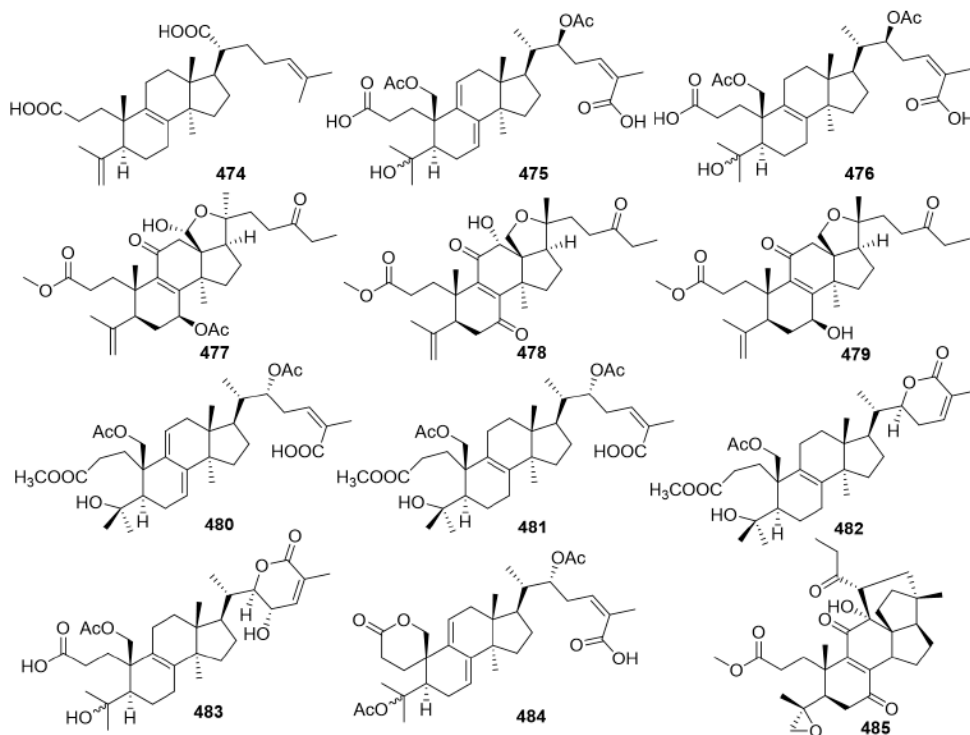

Figure S46 Structures of compounds 474-485



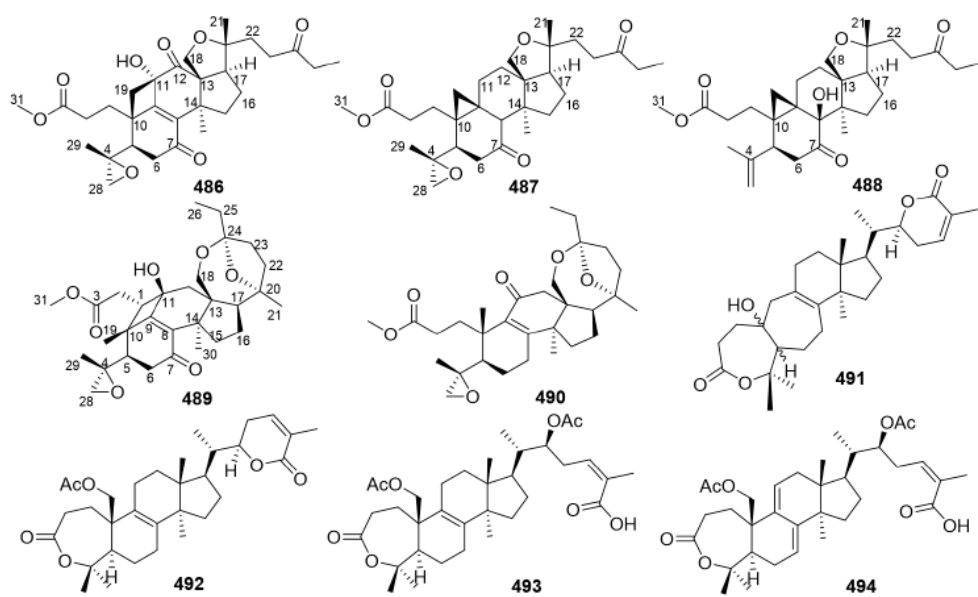

Figure S47 Structures of compounds 486-494

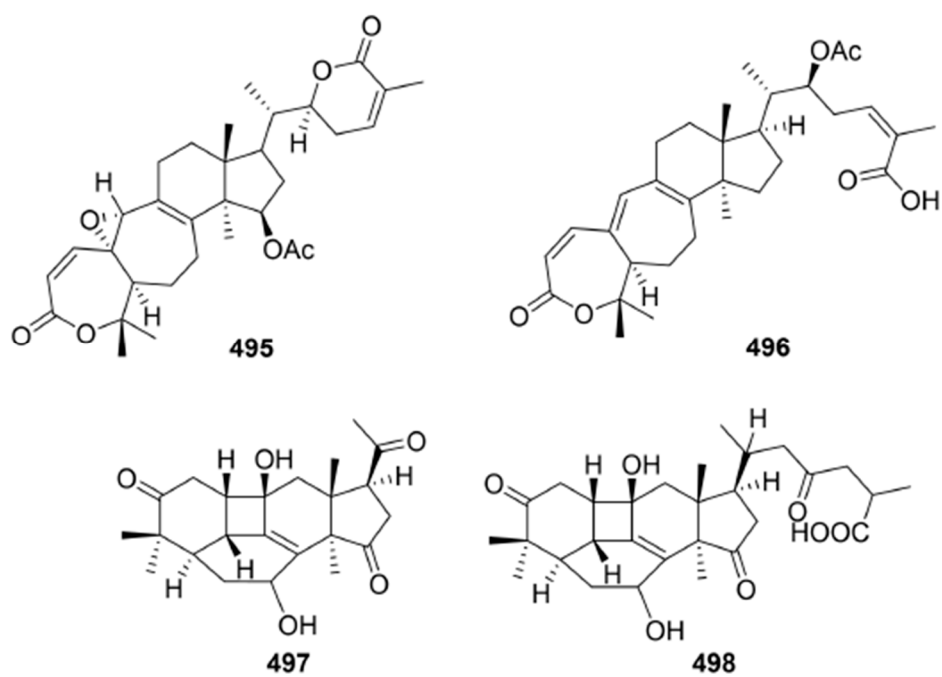

Figure S48 Structures of compounds 495-498



Table S17 Chemical Structures of compounds 1-21

| cpd | name                                 | structure                                                                            |
|-----|--------------------------------------|--------------------------------------------------------------------------------------|
| 1   | Isolarch alcohol                     | 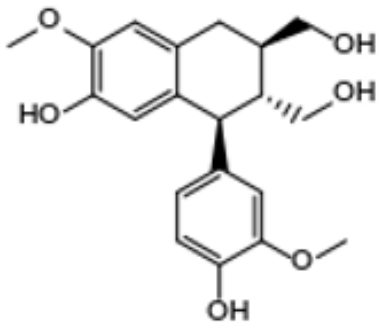   |
| 2   | Dihydrodehydrodic<br>Onifery alcohol |    |
| 3   | Bitter neool                         |  |
| 4   | Vanillil                             |  |
| 5   | 2,3-Dichloroquinoxaline              |  |



| cpd | name                                                                      | structure                                                                            |
|-----|---------------------------------------------------------------------------|--------------------------------------------------------------------------------------|
| 6   | 1,5-Dicaffeoylquinine<br>sour                                             | 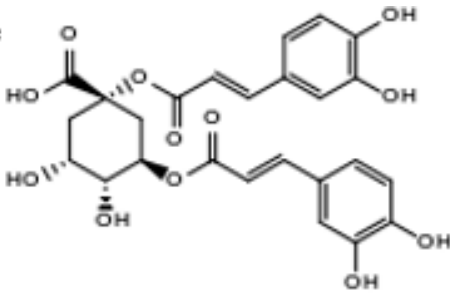   |
| 7   | Protocatechin                                                             |     |
| 8   | 3-carboxy-6,7-dihydroxy-<br>1-(3',4'-<br>dihydroxyphenyl)-<br>naphthalene |    |
| 9   | Ethyl caffeate                                                            |  |
| 10  | 5,6,7-<br>Trimethoxyincense<br>Legumin                                    |   |
| 11  | Emodin-1-O-grapes<br>glycoside                                            |  |



| cpd | name                                   | structure                                                                            |
|-----|----------------------------------------|--------------------------------------------------------------------------------------|
| 12  | p-Coumaric acid                        | 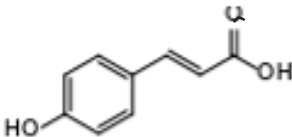   |
| 13* | Dipterin                               |     |
| 14* | methyl 3,5-dihydroxy-4-methoxybenzoate |     |
| 15  | Isazinepidine                          |    |
| 16  | (-)-Syringol resin                     |  |
| 17  | (+)-Syringin                           |  |



| cpd | name               | structure                                                                            |
|-----|--------------------|--------------------------------------------------------------------------------------|
| 18  | Trans-caffeic acid | 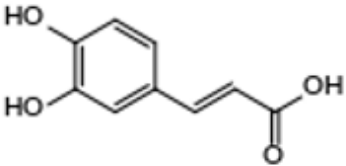   |
| 19  | Emodin             |    |
| 20  | vanillic acid      |    |
| 21  | Methyl caffeate    |  |



*Albizia julibrissin* durazz bark

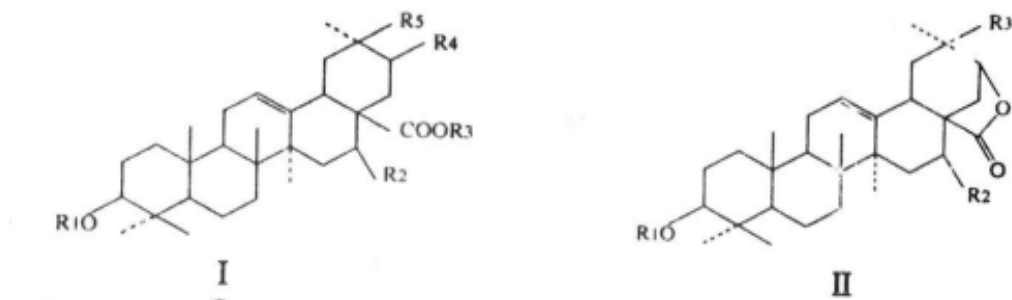

Figure S49 Chemical structure of compounds 1-41

Table S18 Chemical Structures of compounds 1-41

| cpd | Name                        | Mother nucleus | Substituents                                                                                                                                                                                                                                                                                                                                 |
|-----|-----------------------------|----------------|----------------------------------------------------------------------------------------------------------------------------------------------------------------------------------------------------------------------------------------------------------------------------------------------------------------------------------------------|
| 1   | Julibroside J <sub>1</sub>  | I              | $R_1 : \text{xyl} \xrightarrow{2} \text{ara} \xrightarrow{6} \text{gle} : R_2 : \text{OH} : R_3 : \text{gle} \xrightarrow{3} (\text{araf} \xrightarrow{4}) \text{-tha} \xrightarrow{2} \text{gle} : R_4 : \text{qui} \xrightarrow{6} \text{B}(\text{6S}) \xrightarrow{4} \text{qui} \xrightarrow{6} \text{A}(\text{6S}) : R_5 : \text{CH}_3$ |
| 2   | Julibroside J <sub>2</sub>  | I              | $R_1, R_2, R_3, R_5 \text{ 同 } J_1 : R_4 : \text{A}(\text{6S}) \xrightarrow{4} \text{qui} \xrightarrow{6} \text{A}(\text{6S})$                                                                                                                                                                                                               |
| 3   | Julibroside J <sub>3</sub>  | I              | $R_1 : \text{xyl} \xrightarrow{2} \text{ara} \xrightarrow{6} 2\text{-acetamido-2-deoxy-gle} : R_2, R_3, R_4, R_5 \text{ 同 } J_1$                                                                                                                                                                                                             |
| 4   | Julibroside J <sub>4</sub>  | I              | $R_1 : \text{xyl} \xrightarrow{2} \text{fuc} \xrightarrow{6} \text{gle} : R_2, R_3, R_5 \text{ 同 } J_1 : R_4 : \text{qui} \xrightarrow{6} \text{B}(\text{6S}) \xrightarrow{4} \text{qui} \xrightarrow{6} \text{B}(\text{6S})$                                                                                                                |
| 5   | Julibroside J <sub>5</sub>  | I              | $R_1, R_2, R_3, R_5 \text{ 同 } J_4 : R_4 : \text{qui} \xrightarrow{6} \text{B}(\text{6R}) \xrightarrow{4} \text{qui} \xrightarrow{6} \text{A}(\text{6S})$                                                                                                                                                                                    |
| 6   | Julibroside J <sub>6</sub>  | I              | $R_1, R_2, R_3, R_5 \text{ 同 } J_3 : R_4 \text{ 同 } J_2$                                                                                                                                                                                                                                                                                     |
| 7   | Julibroside J <sub>7</sub>  | I              | $R_1, R_2, R_3, R_5 \text{ 同 } J_1 : R_4 : \text{A}(\text{6S}) \xrightarrow{3} \text{qui} \xrightarrow{6} \text{A}(\text{6S})$                                                                                                                                                                                                               |
| 8   | Julibroside J <sub>8</sub>  | I              | $R_1, R_2, R_3, R_5 \text{ 同 } J_4 : R_4 : \text{qui} \xrightarrow{6} \text{B}(\text{6S}) \xrightarrow{4} \text{qui} \xrightarrow{6} \text{A}(\text{6S})$                                                                                                                                                                                    |
| 9   | Julibroside J <sub>9</sub>  | I              | $R_1, R_2, R_3, R_5 \text{ 同 } J_1 : R_4 : \text{qui} \xrightarrow{6} \text{B}(\text{6S}) \xrightarrow{4} \text{qui} \xrightarrow{6} \text{A}(\text{6R})$                                                                                                                                                                                    |
| 10  | Julibroside J <sub>10</sub> | I              | $R_1, R_2, R_3, R_5 \text{ 同 } J_1 : R_4 : \text{qui} \xrightarrow{6} \text{B}(\text{6R}) \xrightarrow{2} \text{qui} \xrightarrow{6} \text{A}(\text{6S})$                                                                                                                                                                                    |
| 11  | Julibroside J <sub>11</sub> | I              | $R_1, R_2, R_3, R_5 \text{ 同 } J_4 : R_4 : \text{qui} \xrightarrow{6} \text{B}(\text{6S}) \xrightarrow{2} \text{qui} \xrightarrow{6} \text{A}(\text{6S})$                                                                                                                                                                                    |
| 12  | Julibroside J <sub>12</sub> | I              | $R_1 : \text{xyl} \xrightarrow{2} \text{fuc} \xrightarrow{6} 2\text{-acetamido-2-deoxy-gle} : R_2, R_3, R_5 \text{ 同 } J_1 : R_4 : \text{qui} \xrightarrow{6} \text{B}(\text{6R}) \xrightarrow{4} \text{qui} \xrightarrow{6} \text{A}(\text{6S})$                                                                                            |
| 13  | Julibroside J <sub>13</sub> | I              | $R_1, R_2, R_3, R_5 \text{ 同 } J_{12} : R_4 : \text{qui} \xrightarrow{6} \text{B}(\text{6S}) \xrightarrow{4} \text{qui} \xrightarrow{6} \text{A}(\text{6S})$                                                                                                                                                                                 |
| 14  | Julibroside J <sub>14</sub> | I              | $R_1, R_2, R_3, R_5 \text{ 同 } J_1 : R_4 : \text{qui} \xrightarrow{6} \text{B}(\text{6R}) \xrightarrow{4} \text{qui} \xrightarrow{6} \text{B}(\text{6S})$                                                                                                                                                                                    |
| 15  | Julibroside J <sub>15</sub> | I              | $R_1, R_2, R_3, R_5 \text{ 同 } J_4 : R_4 : \text{qui} \xrightarrow{6} \text{B}(\text{6S}) \xrightarrow{4} \text{qui} \xrightarrow{6} \text{B}(\text{6S})$                                                                                                                                                                                    |
| 16  | Julibroside J <sub>20</sub> | I              | $R_1, R_2, R_3, R_5 \text{ 同 } J_1 : R_4 : \text{xyl} \xrightarrow{6} \text{A}(\text{6S})$                                                                                                                                                                                                                                                   |
| 17  | Julibroside J <sub>22</sub> | I              | $R_1, R_2, R_3, R_5 \text{ 同 } J_1 : R_4 : \text{qui} \xrightarrow{6} \text{A}(\text{6S})$                                                                                                                                                                                                                                                   |
| 18  | Julibroside J <sub>23</sub> | I              | $R_1, R_2, R_3, R_5 \text{ 同 } J_4 : R_4 : \text{xyl} \xrightarrow{6} \text{B}(\text{6R}) \xrightarrow{4} \text{qui} \xrightarrow{6} \text{A}(\text{6S})$                                                                                                                                                                                    |
| 19  | Julibroside J <sub>24</sub> | I              | $R_1, R_2, R_3, R_5 \text{ 同 } J_1 : R_4 : \text{A}(\text{6S}) \xrightarrow{3} \text{xyl} \xrightarrow{6} \text{A}(\text{6S})$                                                                                                                                                                                                               |
| 20  | Julibroside J <sub>25</sub> | I              | $R_1, R_2, R_3, R_5 \text{ 同 } J_3 : R_4 : \text{qui} \xrightarrow{6} \text{A}(\text{6S})$                                                                                                                                                                                                                                                   |
| 21  | Julibroside J <sub>26</sub> | I              | $R_1, R_2, R_3, R_5 \text{ 同 } J_1 : R_4 : \text{qui} \xrightarrow{6} \text{A}(\text{6S})$                                                                                                                                                                                                                                                   |
| 22  | Julibroside J <sub>27</sub> | I              | $R_1, R_2, R_3, R_5 \text{ 同 } J_1 : R_4 : \text{同 } J_2$                                                                                                                                                                                                                                                                                    |
| 23  | Julibroside J <sub>28</sub> | I              | $R_1, R_2, R_3, R_5 \text{ 同 } J_{12} : R_4 : \text{同 } J_{14}$                                                                                                                                                                                                                                                                              |



| cpd | Name                                        | Mother nucleus | Substituents                                                                                                                                                                                                                         |
|-----|---------------------------------------------|----------------|--------------------------------------------------------------------------------------------------------------------------------------------------------------------------------------------------------------------------------------|
| 24  | Julibroside J I                             | I              | $R_1 : \text{xyl} \xrightarrow{2} \text{fuc} \xrightarrow{6} (\text{gle} \xrightarrow{2})\text{-gle} ; R_2, R_3, R_5 \text{ 同 } J_1 ; R_4 : \text{qui} \xrightarrow{6} \text{B} \xrightarrow{4} \text{qui} \xrightarrow{6} \text{B}$ |
| 25  | Julibroside J II                            | I              | $R_1, R_2, R_3, R_5 \text{ 同 } J_4 ; R_4 : \text{同 } J \text{ I}$                                                                                                                                                                    |
| 26  | Julibroside J III                           | I              | $R_1, R_2, R_3, R_5 \text{ 同 } J_{12} ; R_4 : \text{同 } J \text{ I}$                                                                                                                                                                 |
| 27  | Prosapogenin1                               | I              | $R_1, R_2, R_5 \text{ 同 } J_4 ; R_3 : \text{H} ; R_4 : \text{OH}$                                                                                                                                                                    |
| 28  | Prosapogenin2                               | I              | $R_1, R_2, R_5 \text{ 同 } J_3 ; R_3 : \text{H} ; R_4 : \text{OH}$                                                                                                                                                                    |
| 29  | Prosapogenin3                               | II             | $R_1 : \text{xyl} \xrightarrow{2} \text{ara} \xrightarrow{6} \text{gle} ; R_2 : \text{OH} ; R_3 : \text{CH}_3$                                                                                                                       |
| 30  | Prosapogenin4                               | II             | $R_1 : \text{xyl} \xrightarrow{2} \text{ara} \xrightarrow{6} 2\text{-acetamido-2-deoxy-gle} ; R_2 : \text{OH} ; R_3 : \text{CH}_3$                                                                                                   |
| 31  | Prosapogenin5 (Julibroside A <sub>1</sub> ) | II             | $R_1 : \text{xyl} \xrightarrow{2} \text{fuc} \xrightarrow{6} (\text{gle} \xrightarrow{2})\text{-gle} ; R_2 : \text{OH} ; R_3 : \text{CH}_3$                                                                                          |
| 32  | Prosapogenin6 (Julibroside A <sub>2</sub> ) | II             | $R_1 : \text{xyl} \xrightarrow{6} \text{fuc} \xrightarrow{6} \text{gle} ; R_2 : \text{OH} ; R_3 : \text{CH}_3$                                                                                                                       |
| 33  | Prosapogenin7 (Julibroside A <sub>3</sub> ) | II             | $R_1 : \text{xyl} \xrightarrow{2} \text{fuc} \xrightarrow{6} 2\text{-acetamido-2-deoxy-gle} ; R_2 : \text{OH} ; R_3 : \text{CH}_3$                                                                                                   |
| 34  | Prosapogenin8                               | I              | $R_1, R_2, R_3, R_5 \text{ 同 } J \text{ I} ; R_4 : \text{qui} \xrightarrow{6} \text{B}$                                                                                                                                              |
| 35  | Prosapogenin9                               | I              | $R_1, R_2, R_3, R_5 \text{ 同 } J_4 ; R_4 : \text{qui} \xrightarrow{6} \text{B}$                                                                                                                                                      |
| 36  | Prosapogenin10                              | I              | $R_1, R_2, R_3, R_5 \text{ 同 } J_4 ; R_4 : \text{qui} \xrightarrow{6} \text{A}$                                                                                                                                                      |
| 37  | Prosapogenin11                              | I              | $R_1, R_3, R_5 \text{ 同 } J_4 ; R_2 : \text{H} ; R_4 : \text{qui} \xrightarrow{6} \text{B}$                                                                                                                                          |
| 38  | Prosapogenin12                              | I              | $R_1, R_3, R_5 \text{ 同 } J_1 ; R_2 : \text{H} ; R_4 : \text{qui} \xrightarrow{6} \text{B}$                                                                                                                                          |
| 39  | Julibroside A <sub>4</sub>                  | II             | $R_1 : \text{gle} \xrightarrow{4} \text{gle} ; R_2 : \text{-O-gle} ; R_3 : \text{CH}_3$                                                                                                                                              |
| 40  | Julibroside B <sub>1</sub>                  | II             | $R_1 : \text{gle} \xrightarrow{4} \text{gle} ; R_2 : \text{-O-gle} ; R_3 : \text{CH}_2 \text{ OH}$                                                                                                                                   |
| 41  | Julibroside C <sub>1</sub>                  | II             | $R_1 : \text{xyl} \xrightarrow{2} \text{fuc} \xrightarrow{6} (\text{gle} \xrightarrow{2})\text{-gle} ; R_2 : \text{OH} ; R_3 : \text{COOH}$                                                                                          |



*Polygala tenuifolia* willd

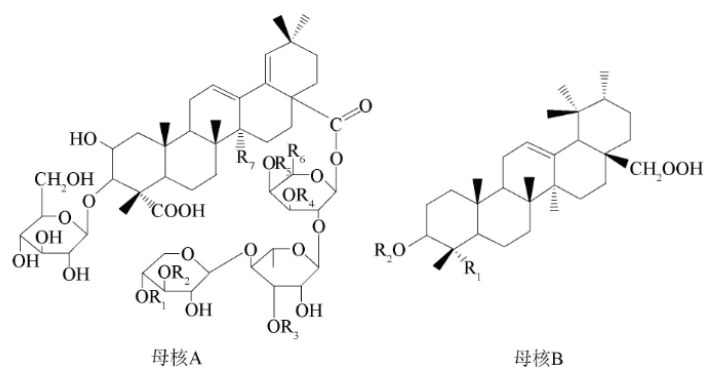

Figure S50 Chemical structure of compounds 1-38

Table S19 Chemical Structures of compounds 1-38



| cpd | name                    | Substituents   |        |     |     |        |                   |                 |                    |
|-----|-------------------------|----------------|--------|-----|-----|--------|-------------------|-----------------|--------------------|
|     |                         | Mother nucleus | R1     | R2  | R3  | R4     | R5                | R6              | R7                 |
| 1   | Onjisaponin A           | A              | Gal    | H   | Api | Rha    | a                 | CH <sub>3</sub> | CH <sub>2</sub> OH |
| 2   | Onjisaponin B           | A              | Gal    | H   | H   | Rha    | a                 | CH <sub>3</sub> | CH <sub>2</sub> OH |
| 3   | Onjisaponin E           | A              | Gal    | H   | H   | H      | b                 | CH <sub>3</sub> | CH <sub>2</sub> OH |
| 4   | Onjisaponin F           | A              | H      | Ara | Api | H      | b                 | CH <sub>3</sub> | CH <sub>2</sub> OH |
| 5   | Onjisaponin G           | A              | H      | H   | Api | H      | b                 | CH <sub>3</sub> | CH <sub>2</sub> OH |
| 6   | Onjisaponin J           | A              | H      | Ara | e   | Rha    | a                 | COOH            | CH <sub>3</sub>    |
| 7   | Onjisaponin L           | A              | Gal    | H   | e   | Rha    | a                 | COOH            | CH <sub>3</sub>    |
| 8   | Onjisaponin O           | A              | Gal    | H   | H   | Rha    | b                 | COOH            | CH <sub>3</sub>    |
| 9   | Onjisaponin R           | A              | Gal    | H   | Api | H      | b                 | COOH            | CH <sub>3</sub>    |
| 10  | Onjisaponin S           | A              | H      | Ara | Api | Rha    | b                 | COOH            | CH <sub>3</sub>    |
| 11  | Onjisaponin T           | A              | H      | Ara | Api | Glc6Od | b                 | COOH            | CH <sub>3</sub>    |
| 12  | Onjisaponin V           | A              | Gal    | H   | e   | b      | H                 | COOH            | CH <sub>3</sub>    |
| 13  | Onjisaponin W           | A              | H      | Ara | e   | b      | H                 | COOH            | CH <sub>3</sub>    |
| 14  | Onjisaponin X           | A              | H      | Ara | e   | Gal    | b                 | COOH            | CH <sub>3</sub>    |
| 15  | Onjisaponin Y           | A              | H      | H   | H   | Rha    | a                 | COOH            | CH <sub>3</sub>    |
| 16  | Onjisaponin Z           | A              | H      | H   | H   | Rha    | a                 | COOH            | CH <sub>3</sub>    |
| 17  | Onjisaponin Vg          | A              | Gal    | H   | e   | H      | b                 | COOH            | CH <sub>3</sub>    |
| 18  | Onjisaponin Pg          | A              | Gal    | H   | e   | H      | H                 | COOH            | CH <sub>3</sub>    |
| 19  | Onjisaponin Gg          | A              | H      | H   | e   | H      | b                 | COOH            | CH <sub>3</sub>    |
| 20  | Onjisaponin Fg          | A              | H      | Ara | e   | H      | b                 | COOH            | CH <sub>3</sub>    |
| 21  | Onjisaponin Qg          | A              | Gal    | H   | e   | Rha    | H                 | COOH            | CH <sub>3</sub>    |
| 22  | Onjisaponin Ng          | A              | H      | H   | e   | Rha    | a                 | COOH            | CH <sub>3</sub>    |
| 23  | Onjisaponin Sg          | A              | H      | Ara | e   | Rha    | b                 | COOH            | CH <sub>3</sub>    |
| 24  | Onjisaponin Ug          | A              | H      | Ara | e   | Glc    | b                 | COOH            | CH <sub>3</sub>    |
| 25  | Onjisaponin Tg          | A              | H      | Ara | e   | Glc6Od | b                 | COOH            | CH <sub>3</sub>    |
| 26  | Onjisaponin Wg          | A              | Gal    | Ara | Api | b      | H                 | COOH            | CH <sub>3</sub>    |
| 27  | <i>E</i> -onjisaponin H | A              | H      | H   | Api | Rha    | a                 | CH <sub>3</sub> | CH <sub>2</sub> OH |
| 28  | <i>Z</i> -onjisaponin H | A              | H      | H   | Api | Rha    | k                 | CH <sub>3</sub> | CH <sub>2</sub> OH |
| 29  | Sibricasaponins A       | B              | COOH   | g   | -   | -      | -                 | -               | -                  |
| 30  | Sibricasaponins B       | B              | H      | m   | -   | -      | -                 | -               | -                  |
| 31  | Sibricasaponins C       | B              | H      | n   | -   | -      | -                 | -               | -                  |
| 32  | Sibricasaponins E       | A              | Gal    | H   | H   | x      | COCH <sub>3</sub> | CH <sub>3</sub> | -                  |
| 33  | Tenuioflisaponin A      | A              | Gal6Oy | H   | Api | Api    | MC                | CH <sub>3</sub> | CH <sub>2</sub> OH |
| 34  | Tenuioflisaponin B      | A              | Gal6Oh | H   | Api | Api    | MC                | CH <sub>3</sub> | CH <sub>2</sub> OH |
| 35  | Polygalasaponin X XVIII | A              | H      | H   | H   | H      | H                 | CH <sub>3</sub> | CH <sub>2</sub> OH |
| 36  | Polygalasaponin X XII   | A              | H      | H   | H   | H      | H                 | CH <sub>3</sub> | CH <sub>2</sub> OH |
| 37  | Senegin III             | A              | Gal    | H   | H   | Rha    | MC                | CH <sub>3</sub> | CH <sub>2</sub> OH |
| 38  | Senegin IV              | A              | Gal    | H   | Api | Rha    | MC                | CH <sub>3</sub> | CH <sub>2</sub> OH |

注: a-(*E*)-4-methoxy cinanamoyl; b-(*E*)-3,4,5-trimethoxy cinnamoyl; e-3-hydroxy-3-methyl-5-pentanoic acid ester-5-β-D-apiofur-anosyl; g-D-glucopyranuronic acid; k-(*Z*)-4-methoxy cinnamoyl; m-α-D-xyl4SO<sub>3</sub>H; n-β-D-xyl-5SO<sub>3</sub>H; x-D-api ose; y-4-oxide-2-hydroxy-pentanoic acid ester-6-β-D-gal; h-2-hydroxy-4-methyl-pentanoic acid ester-6-β-D-gal; MC-p-methoxycinnamoyl; Api-β-D-apiofuranosyl



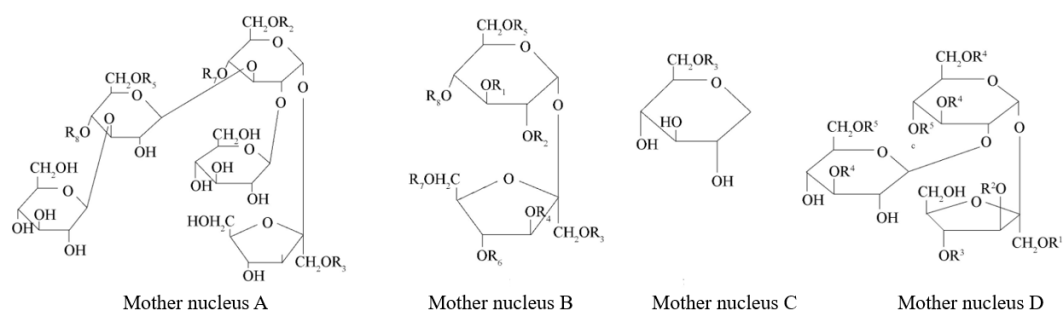

Figure S51 Chemical structure of compounds 39-69  
 Table S20 Chemical Structures of compounds 39-69



| cpd | name                   | Mother nucleus | Substituents |    |   |    |    |    |    |    |
|-----|------------------------|----------------|--------------|----|---|----|----|----|----|----|
|     |                        |                | R1           | R2 | R | R4 | R5 | R6 | R7 | R8 |
| 39  | Tenuifolioses A        | A              | -            | a  | e | b  | a  | -  | i  | a  |
| 40  | Tenuifolioses B        | A              | -            | H  | e | b  | a  | -  | i  | a  |
| 41  | Tenuifolioses C        | A              | -            | H  | e | b  | a  | -  | i  | H  |
| 42  | Tenuifolioses D        | A              | -            | a  | e | b  | a  | -  | i  | H  |
| 43  | Tenuifolioses E        | A              | -            | a  | e | b  | a  | -  | i  | H  |
| 44  | Tenuifolioses F        | A              | -            | a  | e | b  | a  | -  | m  | a  |
| 45  | Tenuifolioses G        | A              | -            | a  | e | b  | a  | -  | m  | H  |
| 46  | Tenuifolioses H        | A              | -            | a  | e | b  | a  | -  | e  | a  |
| 47  | Tenuifolioses I        | A              | -            | a  | e | b  | a  | -  | e  | H  |
| 48  | Tenuifolioses J        | A              | -            | H  | e | b  | a  | -  | e  | a  |
| 49  | Tenuifolioses K        | A              | -            | H  | e | b  | a  | -  | e  | H  |
| 50  | Tenuifolioses L        | A              | -            | a  | e | b  | a  | -  | n  | a  |
| 51  | Tenuifolioses M        | A              | -            | a  | e | b  | a  | -  | n  | H  |
| 52  | Tenuifolioses N        | A              | -            | a  | i | b  | a  | -  | i  | a  |
| 53  | Tenuifolioses O        | A              | -            | H  | i | b  | a  | -  | i  | a  |
| 54  | Tenuifolioses P        | A              | -            | H  | i | b  | a  | -  | i  | H  |
| 55  | Tenuifolioses Q        | A              | -            | H  | e | b  | a  | -  | n  | a  |
| 56  | Tenuifoliside A        | B              | H            | H  | H | l  | g  | H  | H  | H  |
| 57  | Tenuifoliside B        | B              | H            | H  | H | j  | g  | H  | H  | H  |
| 58  | Tenuifoliside C        | B              | H            | H  | H | j  | j  | H  | H  | H  |
| 59  | Tenuifoliside D        | C              | -            | -  | l | -  | -  | -  | -  | -  |
| 60  | Tenuifoliside E        | B              | H            | a  | H | h  | a  | H  | H  | a  |
| 61  | Sibiricose A1          | B              | H            | H  | H | H  | j  | H  | H  | H  |
| 62  | Sibiricose A2          | B              | H            | H  | H | H  | l  | H  | H  | H  |
| 63  | Sibiricose A3          | B              | H            | H  | H | g  | H  | H  | H  | H  |
| 64  | Sibiricose A4          | B              | H            | H  | H | j  | H  | H  | H  | j  |
| 65  | Sibiricose A5          | B              | H            | H  | H | i  | H  | H  | H  | H  |
| 66  | Sibiricose A6          | B              | H            | H  | H | j  | H  | H  | H  | H  |
| 67  | Sibiricose A7          | C              | -            | -  | x | -  | -  | -  | -  | -  |
| 68  | 3,6'-Disinapoylsucrose | B              | H            | H  | H | j  | j  | H  | H  | H  |
| 69  | Polygalatenosides B    | D              | b            | -  | - | -  | -  | -  | -  | -  |

注: a-acetyl; b-benzoyl; d-p-methylbenzoyl; e-(E)-p-coumaroyl; g-p-hydroxybenzoyl; j-(E)-sinapoy; i-(E)-feruloyl; f-benzoyl; k-3,4-dimethoxycinnamoyl; l-(E)-3,4,5-trimethoxycinnamoyl; m-4-O- $\alpha$ -L-rhamnopyranosyl-(E)-feruloyl; n-4-O- $\alpha$ -L-rhamnopyranosyl-(E)-p-coumaroyl; p-3,4-dimethoxycinnamoyl; q-cinnamoyl; x-4-hydroxy-3,5-dimethoxycinnamoyl



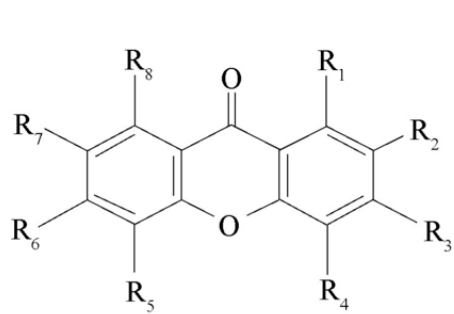

Mother nucleus A

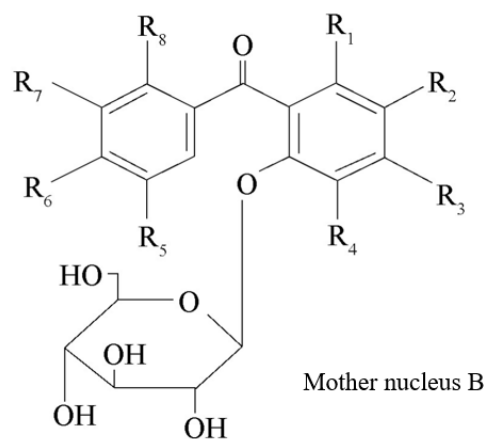

Mother nucleus B

Figure S52 Chemical structure of compounds 70-107

Table S21 Chemical Structures of compounds 70-107



| cpd | name                            | Mother<br>nucleus | Substituents |                    |                     |    |     |            |     |     |
|-----|---------------------------------|-------------------|--------------|--------------------|---------------------|----|-----|------------|-----|-----|
|     |                                 |                   | R1           | R2                 | R                   | R4 | R5  | R6         | R7  | R8  |
| 70  | lancerin                        | A                 | H            | H                  | OH                  | H  | H   | OH         | Glc | H   |
| 71  | onjixanthone I                  | A                 | OMe          | OMe                | OMe                 | H  | H   | H          | OH  | H   |
| 72  | onjixanthone II                 | A                 | OH           | OMe                | OH                  | H  | H   | OH         | OMe | H   |
| 73  | polygalaxanthone III            | A                 | OH           | Glc6-1Api          | OH                  | H  | H   | OH         | OMe | H   |
| 74  | polygalaxanthone IV             | A                 | OH           | H                  | OMe                 | -  | -   | OGlc2-1Rha | OMe | H   |
| 75  | polygalaxanthone V              | A                 | OH           | H                  | OH                  | -  | -   | OGlc2-1Rha | OMe | H   |
| 76  | Polygalaxanthone VI             | A                 | OMe          | OMe                | OMe                 | -  | -   | OGlc       | OMe | H   |
| 77  | polygalaxanthone VII            | A                 | OH           | OMe                | Glc2-1              | OH | OMe | H          | H   | H   |
| 78  | sibiriphenone A                 | B                 | OH           | H                  | OH                  | H  | H   | OH         | OMe | H   |
| 79  | sibiricaxanthone A              | A                 | OH           | Glc6-1Api          | OH                  | H  | H   | H          | OH  | H   |
| 80  | sibiricaxanthone B              | A                 | OH           | Glc2-1Rha          | OH                  | H  | H   | H          | OH  | H   |
| 81  | 1,2,3-trimethoxy-7-hydrA        |                   | OMe          | OMe                | OMe                 | H  | H   | H          | OH  | H   |
| 82  | 1,3,6-trihydroxy-2,7-dirA       |                   | OH           | OMe                | OH                  | H  | H   | OH         | OMe | H   |
| 83  | 1,2,7-trimethoxy-3-hydrA        |                   | OMe          | OMe                | OH                  | H  | H   | H          | OMe | H   |
| 84  | 1,2,3,7-tetramethoxyxanA        |                   | OMe          | OMe                | OMe                 | H  | H   | H          | OMe | H   |
| 85  | 1,7-dihydroxy-3-methoxyA        |                   | OH           | H                  | OMe                 | H  | H   | H          | OH  | H   |
| 86  | 1,7-dihydroxy-2,3-dimeA         |                   | OH           | OMe                | OMe                 | H  | H   | H          | OH  | H   |
| 87  | 1,7-dihydroxy-2,3-methA         |                   | OMe          | OCH <sub>2</sub> O | OCH <sub>2</sub> CH |    | H   | H          | H   | OMe |
| 88  | 1,7-dihydroxy-2,3-di-mA         |                   | OH           | OCH <sub>2</sub> O | OCH <sub>2</sub> CH |    | H   | H          | OH  | H   |
| 89  | 6-hydroxy-2,3,6,7-tetrarA       |                   | H            | OMe                | OMe                 | H  | H   | OMe        | OMe | H   |
| 90  | 6-hydroxy-1,2,3,7-tetrarA       |                   | OMe          | OMe                | OMe                 | H  | H   | OGlc       | OMe | H   |
| 91  | 1,7-dihydroxyxanthone A         |                   | OH           | H                  | H                   | H  | H   | H          | OH  | H   |
| 92  | 1,7-dimethoxyxanthone A         |                   | OMe          | H                  | H                   | H  | H   | H          | OMe | H   |
| 93  | 1-hydroxy-3,7-dimethoxyA        |                   | OH           | H                  | OMe                 | H  | H   | H          | OMe | H   |
| 94  | 1-hydroxy-3,6,7-trimethA        |                   | OH           | H                  | OMe                 | H  | H   | OMe        | OMe | H   |
| 95  | 6,8-dihydroxy-1,2,4-trinA       |                   | OMe          | OMe                | H                   | OH | H   | H          | H   | OH  |
| 96  | 6,8-dihydroxy-1,2,3-trinA       |                   | OMe          | OMe                | OMe                 | H  | H   | H          | H   | OH  |
| 97  | 1,2,3,6,7-pentamethoxyxanA      |                   | OMe          | OMe                | OMe                 | H  | H   | OMe        | OMe | H   |
| 98  | 1,3,7-trihydroxyxanthoneA       |                   | OH           | H                  | OH                  | H  | H   | H          | OH  | H   |
| 99  | 1,6,7-trihydroxy-2,3-dirA       |                   | OH           | OMe                | OMe                 | H  | H   | OH         | OH  | H   |
| 100 | 3-hydroxy-2,8-dimethoxyA        |                   | H            | OMe                | OH                  | H  | H   | H          | H   | OMe |
| 101 | 7-hydroxy-1,2,3-trimethA        |                   | OMe          | OMe                | OMe                 | H  | H   | H          | OH  | H   |
| 102 | 3-hydroxy-1,2,7-trimethA        |                   | OMe          | OMe                | OH                  | H  | H   | H          | OMe | H   |
| 103 | 2,3,8-trimethoxyxanthoneA       |                   | H            | OMe                | OMe                 | H  | H   | H          | H   | OMe |
| 104 | 1,3,6,7-tetramethoxyxanA        |                   | OMe          | H                  | OMe                 | H  | H   | OMe        | OMe | H   |
| 105 | 1,3,7-trimethoxyxanthoneA       |                   | OMe          | H                  | OMe                 | H  | H   | H          | OMe | H   |
| 106 | 7- <i>O</i> -methylmangiferin A | A                 | OH           | Glc                | OH                  | H  | H   | OH         | OMe | H   |
| 107 | euxanthone                      | A                 | OH           | H                  | H                   | H  | H   | H          | OH  | H   |



*Albizia julibrissin* durazz bark

Table S22 Chemical Structures of compounds 1-10

| Cpd | Name                                   |
|-----|----------------------------------------|
| 1   | Quercitrin                             |
| 2   | Kaempferol                             |
| 3   | Quercetin                              |
| 4   | Kaempferol-3-O- $\alpha$ -L-rhamnoside |
| 5   | Luteolin                               |
| 6   | Isorhamnetin                           |
| 7   | Isoquercetin                           |
| 8   | Rutin                                  |
| 9   | Myricetin                              |
| 10  | adanthifolioside A                     |

Figure S53 Chemical structure of compounds 1-10

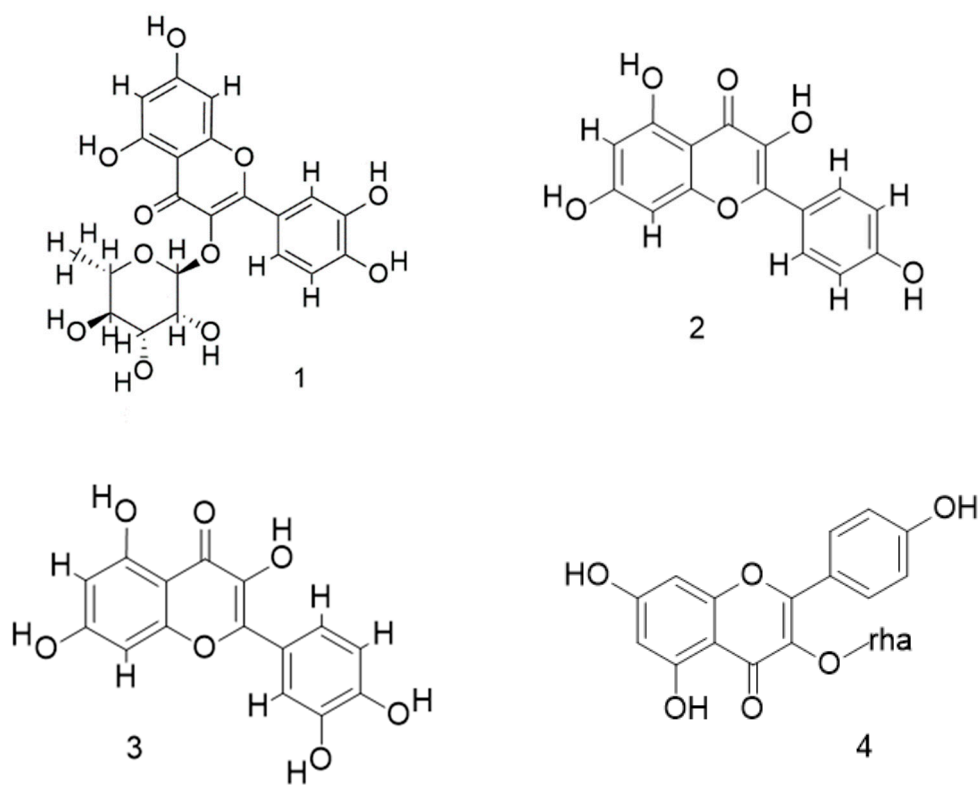



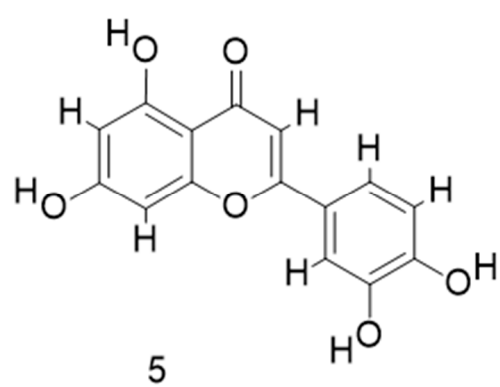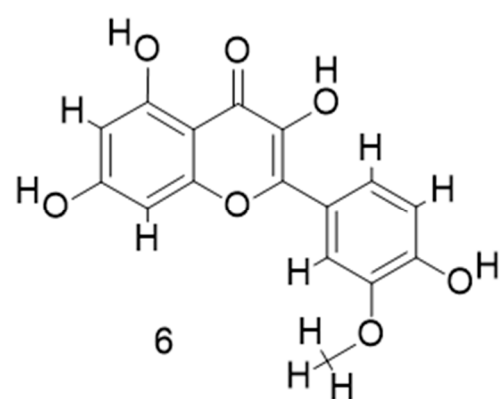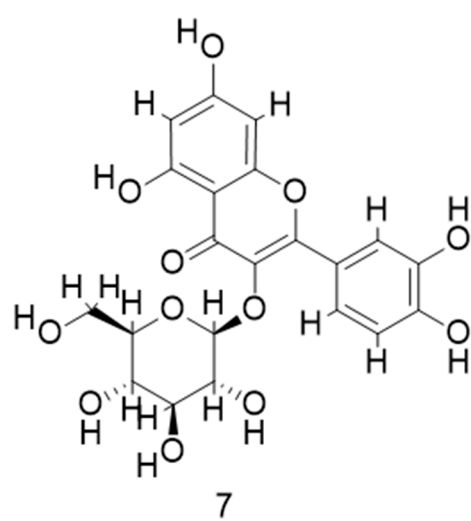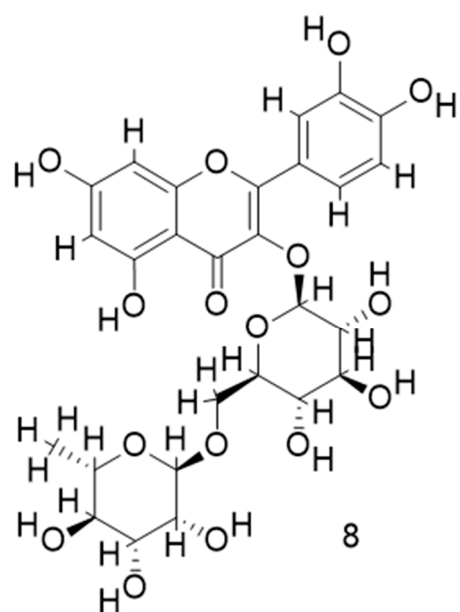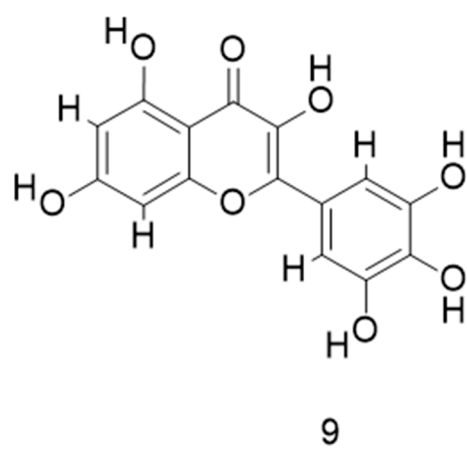



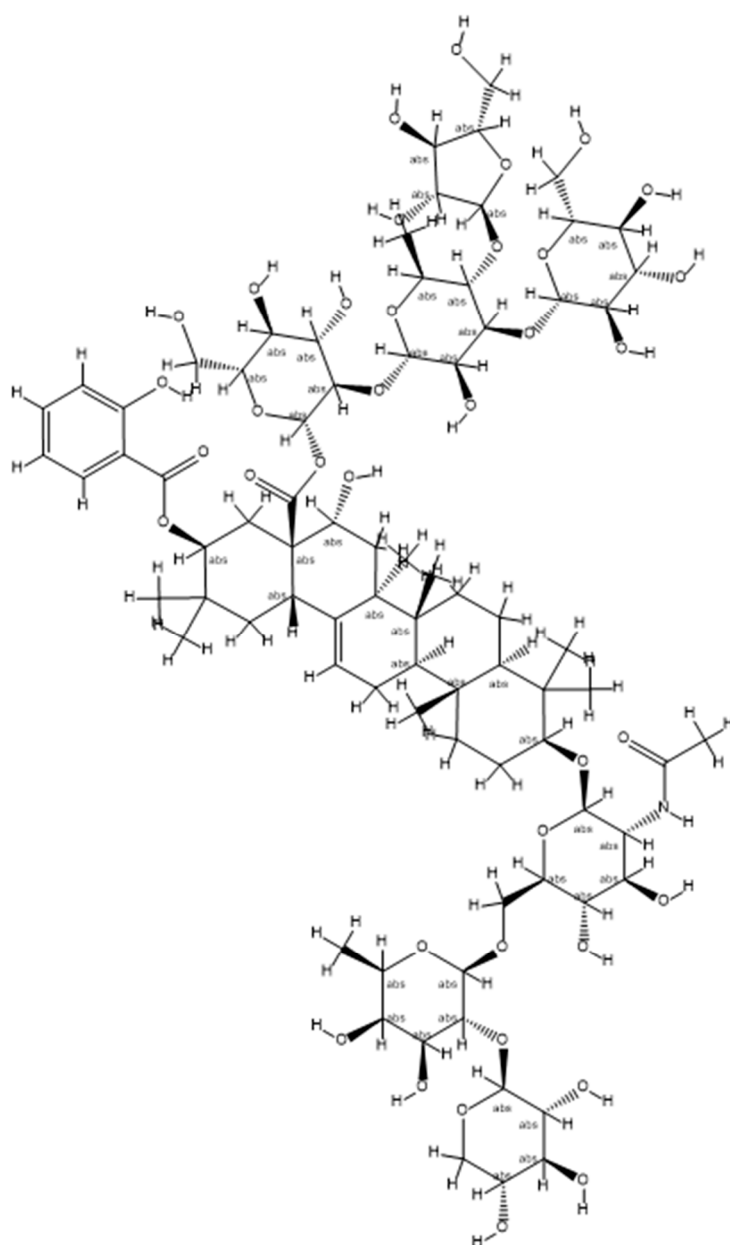

10

# *Apocynum Venetum*

Table S23 Chemical composition of *Apocynum Venetum*

| NO | compound                            | NO | compound                     |
|----|-------------------------------------|----|------------------------------|
| 1  | Quercetin                           | 27 | Acetylated hypericin         |
| 2  | Kaempferol                          | 28 | Neoisorutin                  |
| 3  | Isorhamnetin                        | 29 | 4'-o-methylquercetin         |
| 4  | Quercetin 3-O-(6"-acetyl-glucoside) | 30 | Quercetin-3-O-β-D-glucoside  |
| 5  | Rutin                               | 31 | kaempferol-3-O-β-D-glucoside |



|    |                                                             |    |                                                                                           |
|----|-------------------------------------------------------------|----|-------------------------------------------------------------------------------------------|
| 6  | Isoquercetin                                                | 32 | Quercetin-3-O- $\beta$ -D-glucopyranyl(2 $\rightarrow$ 1)-O- $\beta$ -D-grapea pyranoside |
| 7  | Quercetin 3-O-malonylglucoside                              | 33 | (+)-Catechin                                                                              |
| 8  | Quercetin-3-O-Sophoroside                                   | 34 | (-)-Epicatechin                                                                           |
| 9  | Trifolin                                                    | 35 | (-)-Epigallocatechin                                                                      |
| 10 | kaempferol-3-O-(6''-O-acetyl)- $\beta$ -D-glucopyranoside   | 36 | apocyninA                                                                                 |
| 11 | quercetin-3-O- (6''-O acetyl) - $\beta$ -D-glucopyranoside  | 37 | apocynin B                                                                                |
| 12 | quercetin-3-O- (6''-O-acetyl) - $\beta$ -D-galactopyranosid | 38 | apocynin D                                                                                |
| 13 | kaempferol-7-O- $\alpha$ -L-rhamnopyranoside                | 39 | Trans-2-Penten-1-Ol                                                                       |
| 14 | 2''-Acetylhyperin                                           | 40 | 4,4-Dimethyl-2-cyclopenten-1-one                                                          |
| 15 | Quercetin-3-O-beta-D-glucosylgalactoside                    | 41 | Methylcyclohexane                                                                         |
| 16 | Amentoflavone                                               | 42 | 2-Methyldihydro-3(2H)-furanone                                                            |
| 17 | Quercetin 3-glucoside                                       | 43 | 1,2,5,5-Tetramethyl-1,3-cyclopentadiene                                                   |
| 18 | Quercetin-3-O-glucuronic acid                               | 44 | n-3-Hexenol                                                                               |
| 19 | Quercetin-3-O-(6''-O-malonyl)-galactoside                   | 45 | p-Xylene                                                                                  |
| 20 | Quercetin 3-O-(6''-O-malonyl)- $\beta$ -D-glucoside         | 46 | 1,3,5-Octatriene                                                                          |
| 21 | kaempferol-3-O-(6''-O-malonyl)-glucoside                    | 47 | 2-Furanmethanol                                                                           |
| 22 | kaempferol-3-O-(6''-O-acetyl)-glucoside                     | 48 | 1,3,5,7-Cyclotetraoctene                                                                  |
| 23 | kaempferol-3-rutinoside                                     | 49 | 2-Acetylfuran                                                                             |
| 24 | Quercetin-3- $\beta$ -D-glucopyranoside                     | 50 | 4-Ethylphenol                                                                             |
| 25 | Baimaside                                                   | 51 | 3,5-Dimethylphenol                                                                        |
| 26 | Astragalin                                                  |    |                                                                                           |

---



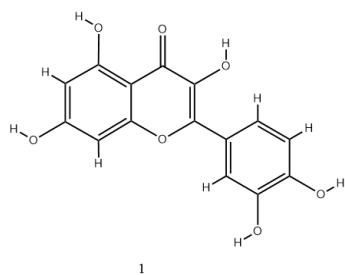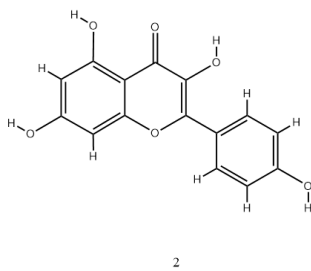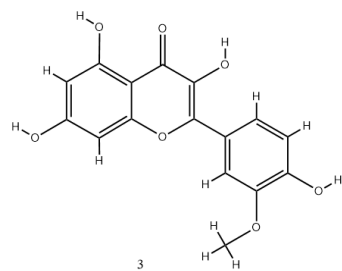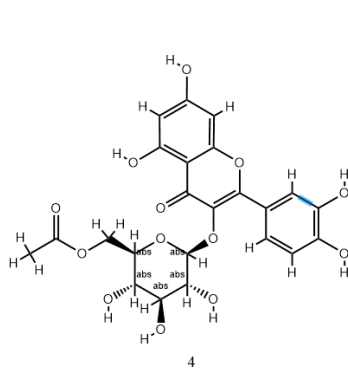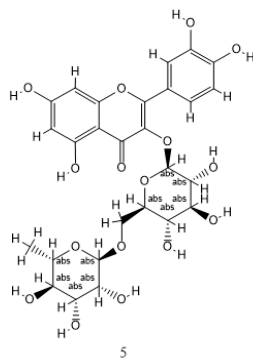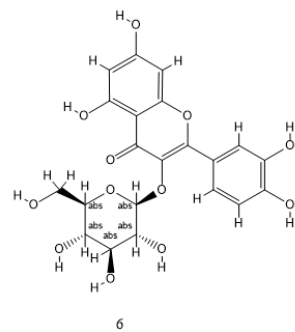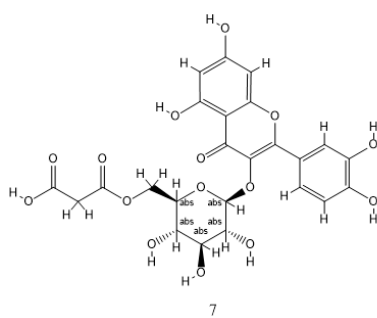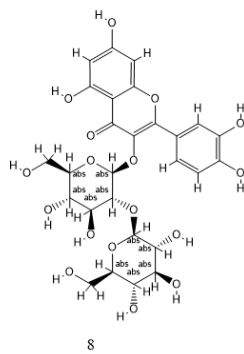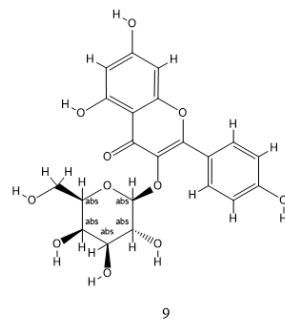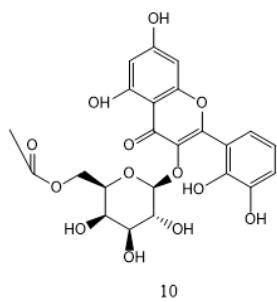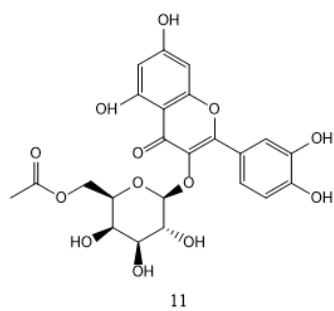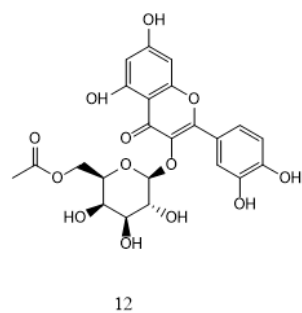



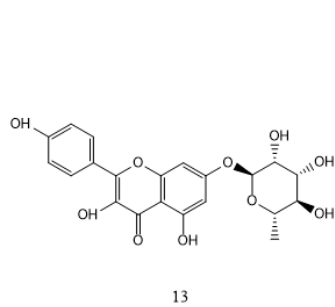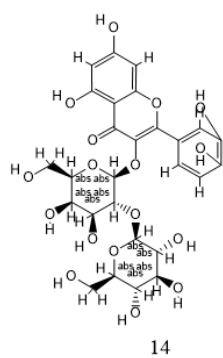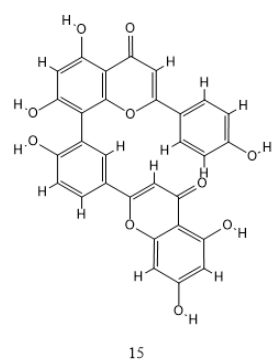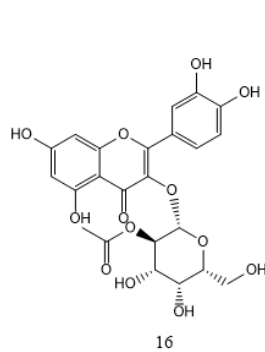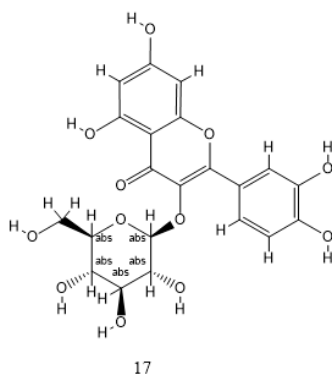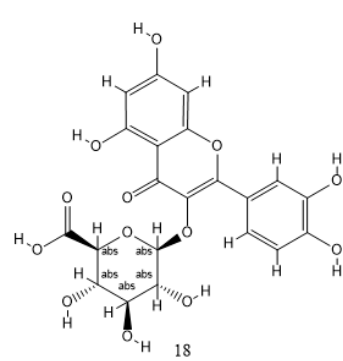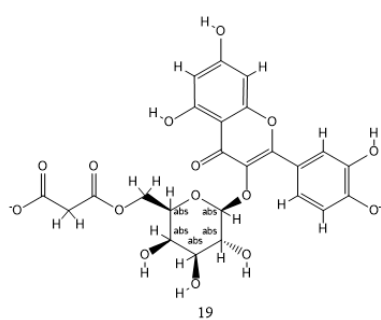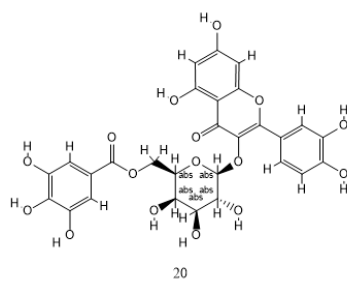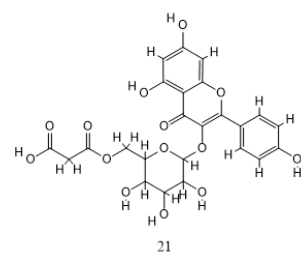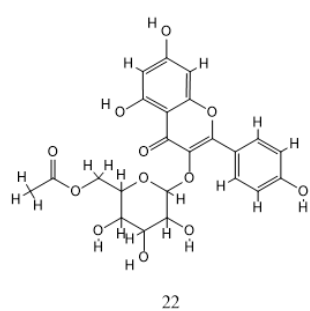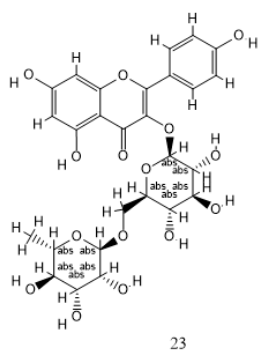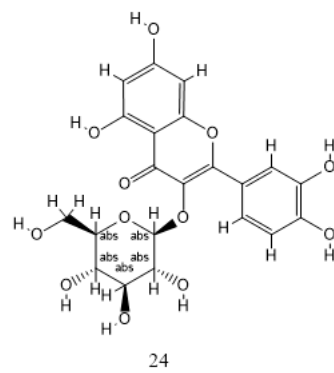



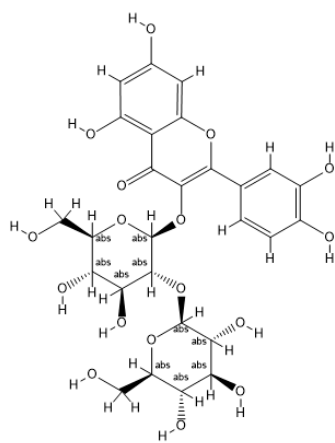

25

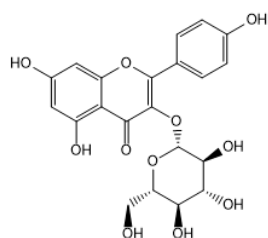

26

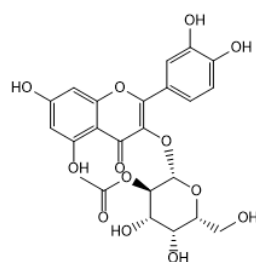

27

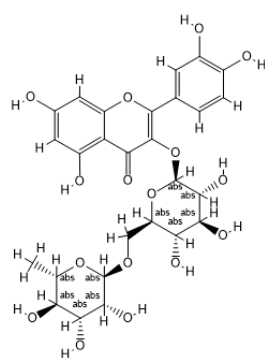

28

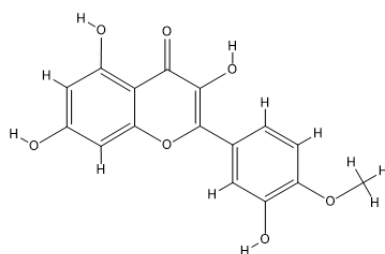

29

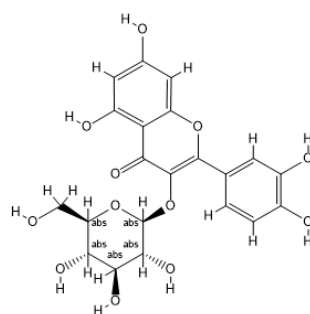

30

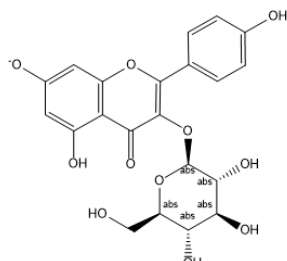

31

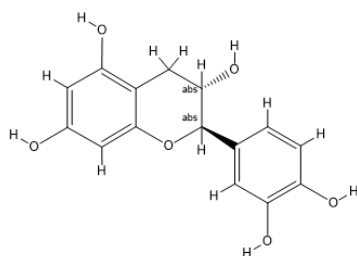

32

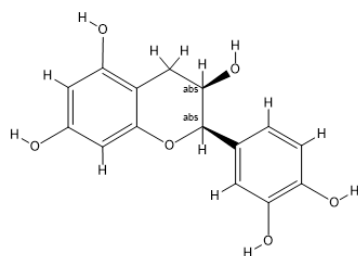

33

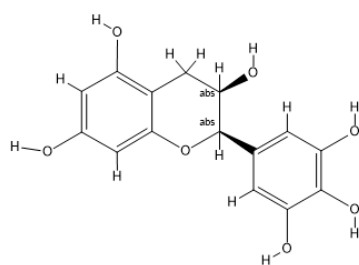

34

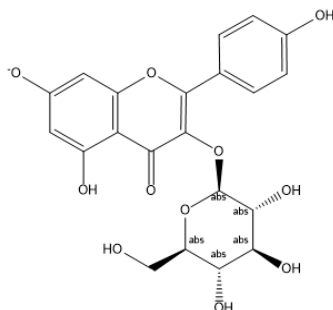

35

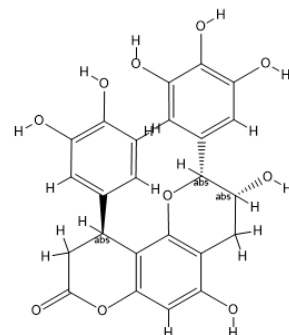

36



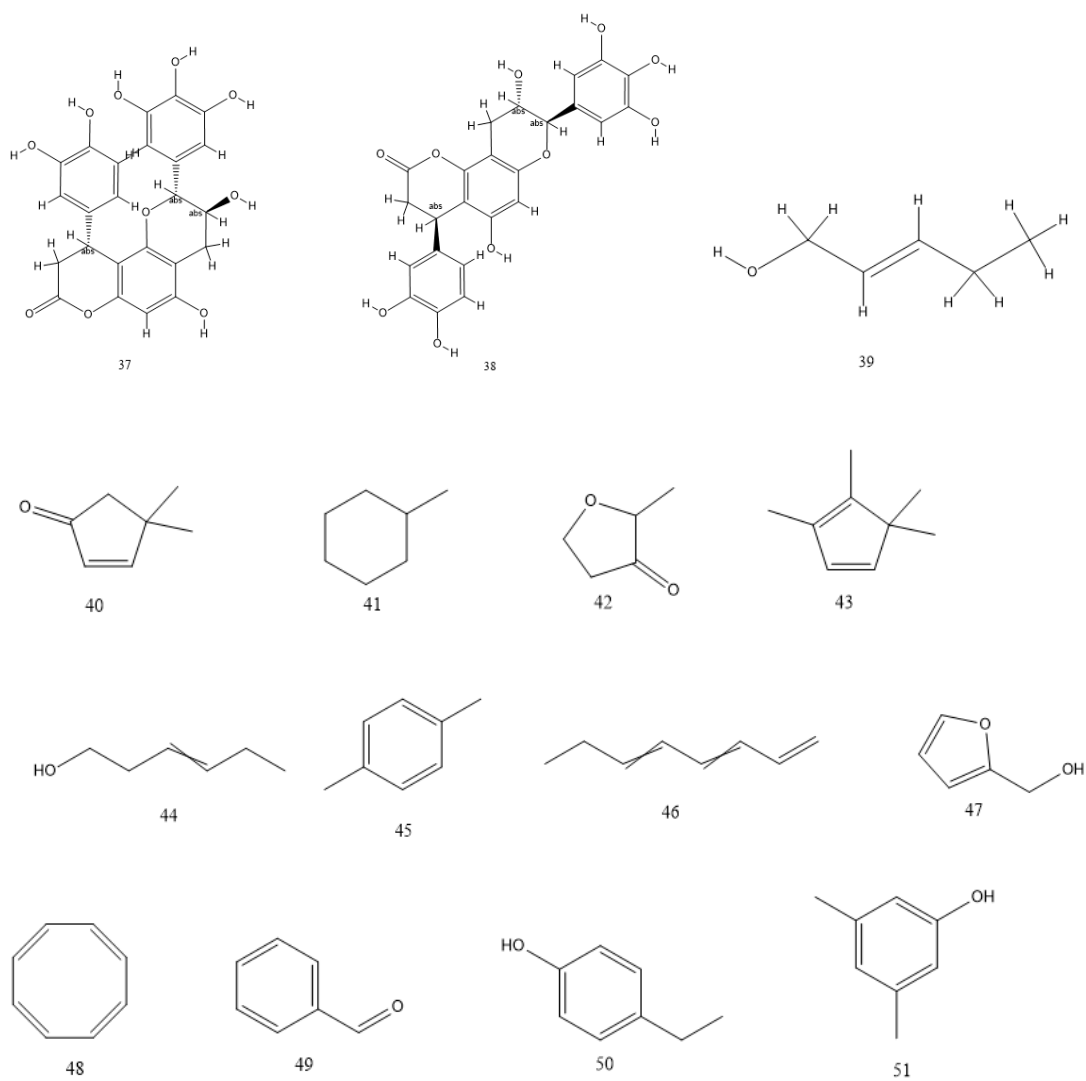

Figure S54. The structures of *Apocynum Venetum*



Table S24 Chemical composition of *Platycladus orientalis* franco

| NO. | compound              | NO. | compound                 |
|-----|-----------------------|-----|--------------------------|
| 1   | pimisolid             | 11  | Methyl 10-undecylenate   |
| 2   | a-cedrol              | 12  | Methyl 9-oxonanoate      |
| 3   | platydiol             | 13  | Methyl 10-oxodecanoate   |
| 4   | (+)-catechin          | 14  | Methyl 11-oxoundecanoate |
| 5   | (-)-Epicatechin       | 15  | Methyl tetradecanoate    |
| 6   | Methyl heptanoate     | 16  | Methyl 2-eicosenoate     |
| 7   | Methyl 4-octenoate    | 17  | Methyl eicosanate        |
| 8   | Methyl octanoate      | 18  | linoleic acid            |
| 9   | Methyl nonanoate      | 19  | linolenic acid           |
| 10  | Methyl 8-oxooctanoate | 20  | arachidonic acid         |

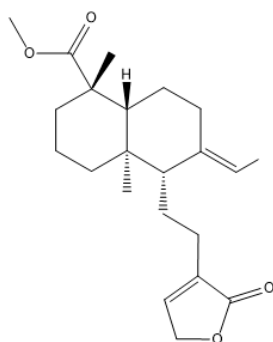

1

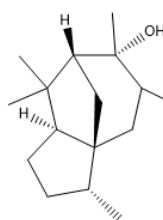

2

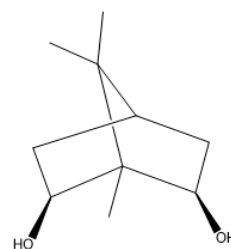

3

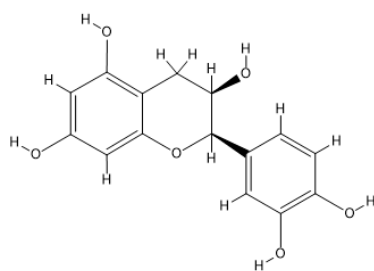

4

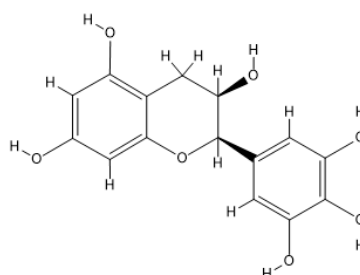

5

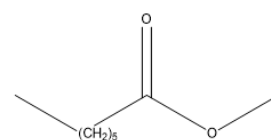

6



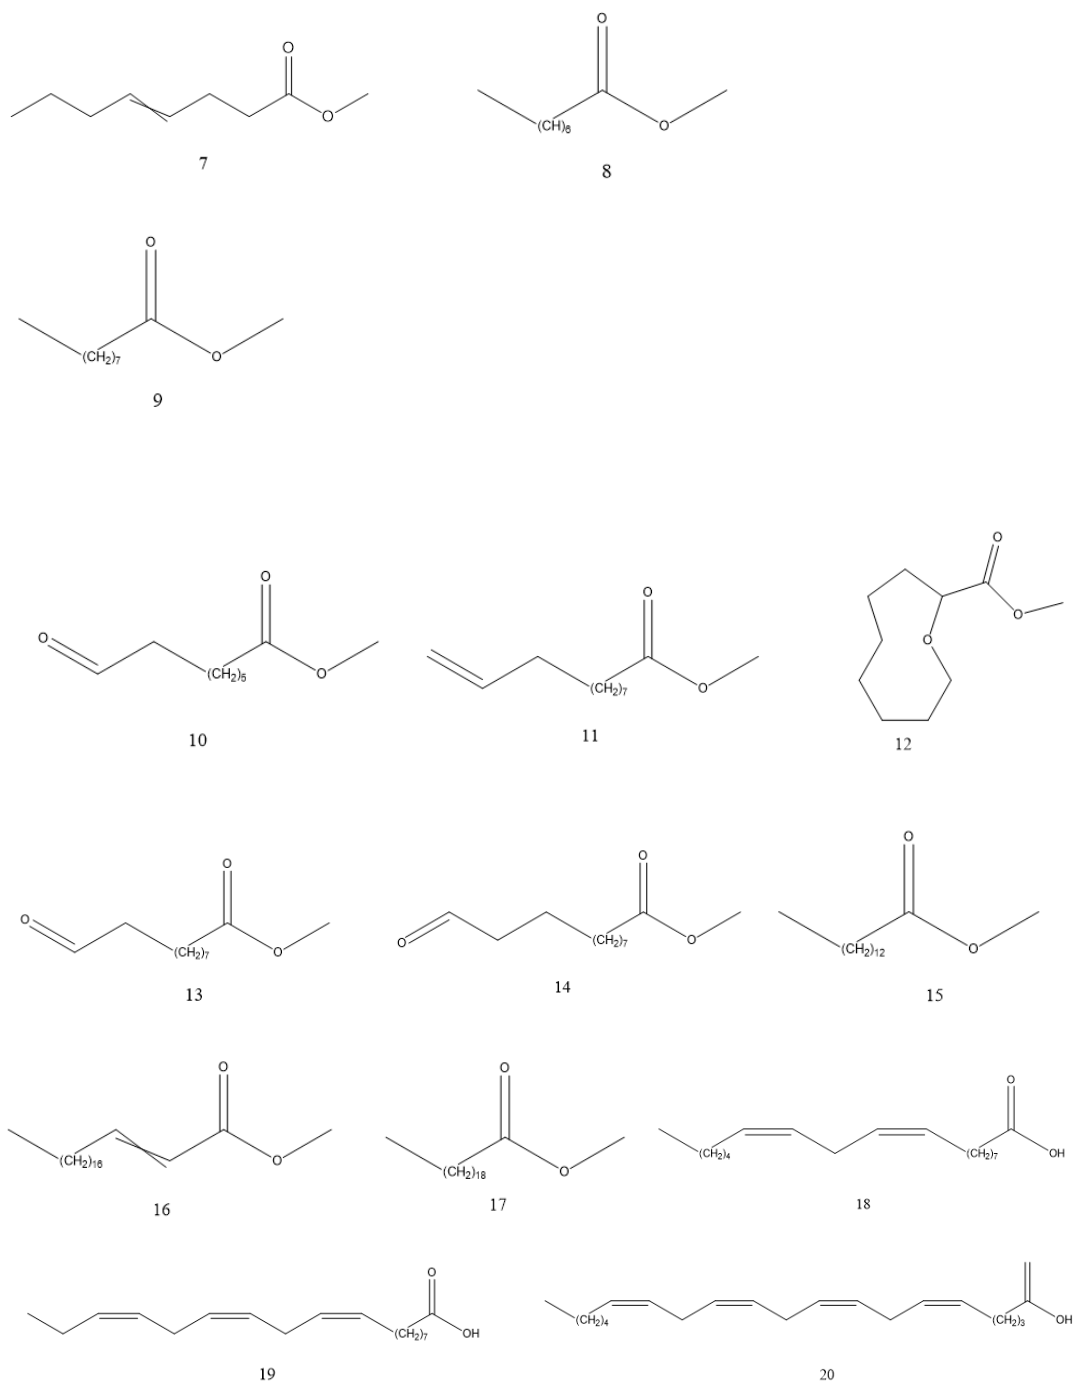

Figure S55. The structures of *Platycladus orientalis* franco

*Polygonum multiflorum* thumb

Table S25 Chemical composition of *Polygonum multiflorum* thumb

| NO.      | compound                       | NO.       | compound                                                       |
|----------|--------------------------------|-----------|----------------------------------------------------------------|
| <b>1</b> | 2,5-dimethyl-7-hydroxychromone | <b>30</b> | 2,5-dimethyl-7-hydroxychromone-7-O- $\beta$ -D-glucopyranoside |
| <b>2</b> | emodin                         | <b>31</b> | noreugenin                                                     |



|           |                                                              |           |                                            |
|-----------|--------------------------------------------------------------|-----------|--------------------------------------------|
| <b>3</b>  | catechin                                                     | <b>32</b> | protocatechuicacid                         |
| <b>4</b>  | physcion-8-O- $\beta$ -D-glucopyranoside                     | <b>33</b> | methylgallate                              |
| <b>5</b>  | torachrysone-8-O- $\beta$ -D-glucopyranoside                 | <b>34</b> | quercetin-3-O- $\beta$ -D-glucopyranoside  |
| <b>6</b>  | emodin-8-O- $\beta$ -D-glucopyranoside                       | <b>35</b> | noreugenin-7-O- $\beta$ -D-glucopyranoside |
| <b>7</b>  | 2,3,5,4-tetrahydroxystilbene-2-O- $\beta$ -D-glucopyranoside | <b>36</b> | 2,5-dimethyl-7-hydroxychromone             |
| <b>8</b>  | W-Hydroxyemodin                                              | <b>37</b> | kaempferol                                 |
| <b>9</b>  | Aloe emodin                                                  | <b>38</b> | genistin                                   |
| <b>10</b> | Emodin-5-O-xyloside                                          | <b>39</b> | hyperin                                    |
| <b>11</b> | Emodin-1-O- $\beta$ -D-glucose                               | <b>40</b> | caffeicacid                                |
| <b>12</b> | Emodin-8-O- (6'-O-malonyl)- $\beta$ -D-glucoside             | <b>41</b> | dodecane                                   |
| <b>13</b> | Emodin methyl ether-8-O- $\beta$ -D-gentiandiglycoside       | <b>42</b> | tridecane                                  |
| <b>14</b> | Palmarula anthrone A                                         | <b>43</b> | tetradecane                                |
| <b>15</b> | 3,6-Dimethoxy-2,5,7,8-tetrahydroxynaphthoquinone             | <b>44</b> | daucosterol                                |
| <b>16</b> | Quercetin                                                    | <b>45</b> | $\beta$ -sitosterol                        |
| <b>17</b> | Luteolin-3-O-xyloside                                        | <b>46</b> | Stilbene glycosides                        |
| <b>18</b> | Apigenin                                                     | <b>47</b> | Stilbene-O-dihexanoside                    |
| <b>19</b> | Luteolin                                                     | <b>48</b> | Stilbene glucoside                         |
| <b>20</b> | Vitex                                                        | <b>49</b> | coumaric acids                             |
| <b>21</b> | Apigenin-7-glucoside                                         | <b>50</b> | Galic acid-3-O-glucoside                   |
| <b>22</b> | Rutin                                                        | <b>51</b> | Protocornflower B5                         |
| <b>23</b> | Viosterin                                                    | <b>52</b> | Diisobutyl phthalate                       |
| <b>24</b> | Piperin                                                      | <b>53</b> | Dibutyl phthalate                          |
| <b>25</b> | Epicatechins                                                 | <b>54</b> | hexanal                                    |
| <b>26</b> | Epicatechin-3-O-gallate                                      | <b>55</b> | 6,10,14-Trimethyl-2-pentadecanone          |
| <b>27</b> | Catechin-5-O- $\beta$ -D-glucoside                           | <b>56</b> | Butyl butyrate                             |
| <b>28</b> | Kaempferol-3- $\beta$ -D-glucoside                           | <b>57</b> | Nonanaldehyde                              |
| <b>29</b> | 2-(2'-hydroxypropyl)-5-carboxymethyl-7-hydroxychromone       |           |                                            |

---



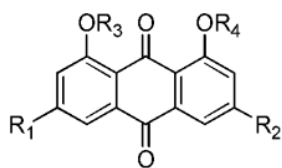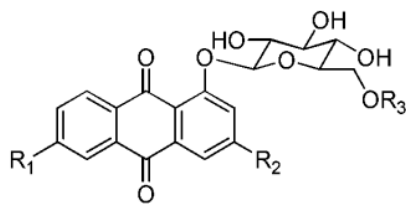

- 1**  $R_1=CH_3$   $R_2=OH$   $R_3=H$   $R_4=H$   
**2**  $R_1=CH_3$   $R_2=OCH_3$   $R_3=H$   $R_4=H$   
**3**  $R_1=CH_2OH$   $R_2=OH$   $R_3=H$   $R_4=H$   
**4**  $R_1=CH_3$   $R_2=H$   $R_3=H$   $R_4=H$   
**5**  $R_1=CH_2OH$   $R_2=H$   $R_3=H$   $R_4=H$   
**6**  $R_1=COOH$   $R_2=H$   $R_3=H$   $R_4=H$   
**7**  $R_1=CH_3$   $R_2=H$   $R_3=H$   $R_4=Glc$   
**8**  $R_1=CH_3$   $R_2=OH$   $R_3=Glc$   $R_4=H$   
**11**  $R_1=CH_3$   $R_2=OH$   $R_3=H$   $R_4=CH_3$

- 9**  $R_1=H$   $R_2=OCH_3$   $R_3=H$   
**12**  $R_1=CH_3$   $R_2=OH$   $R_3=malonyl$   
**13**  $R_1=CH_3$   $R_2=OH$   $R_3=Glc$

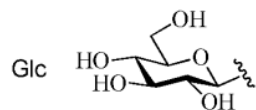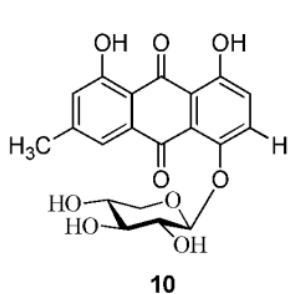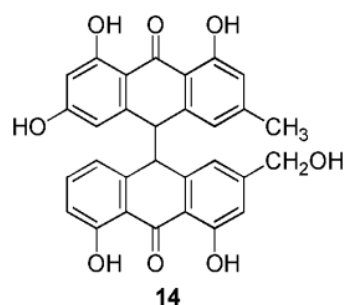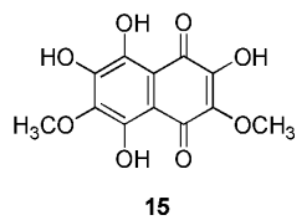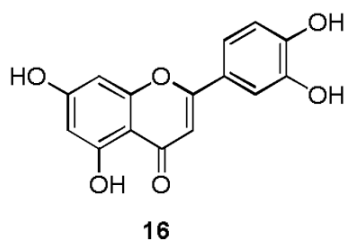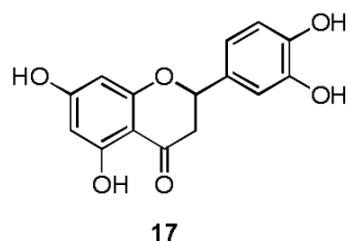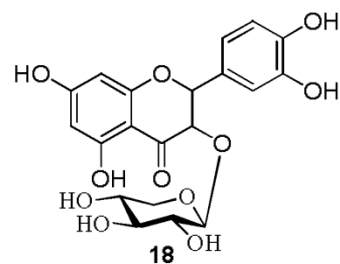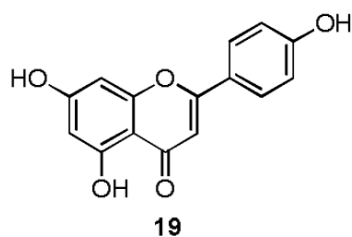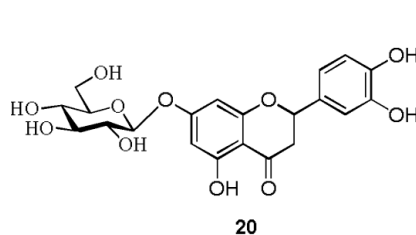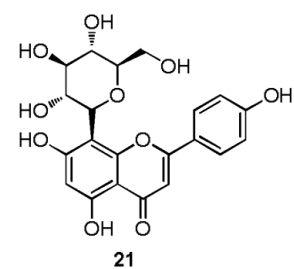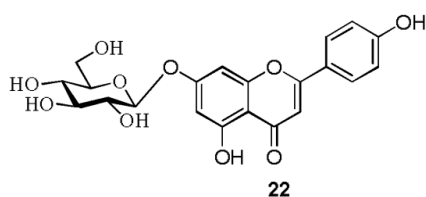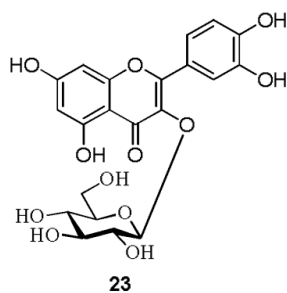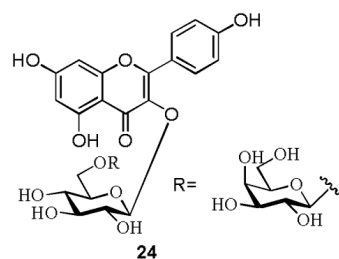



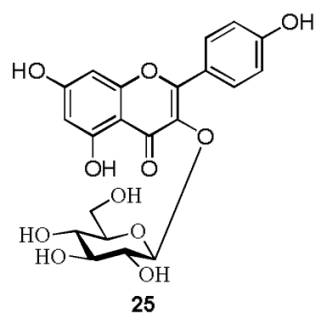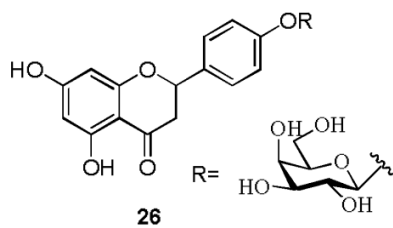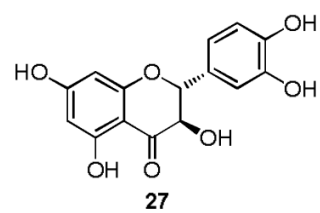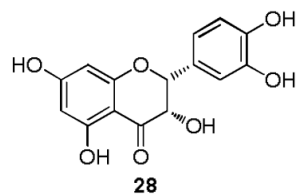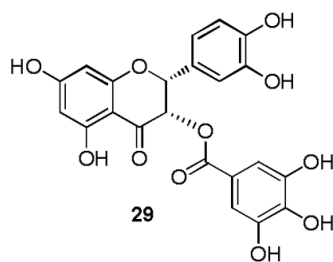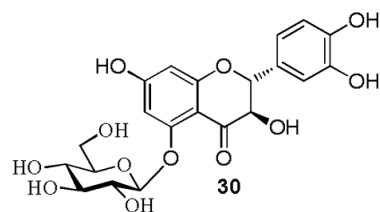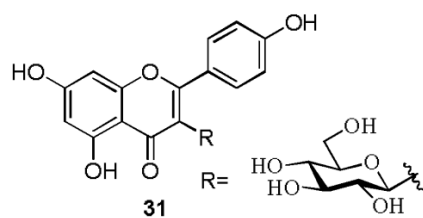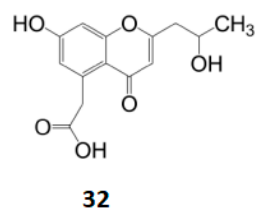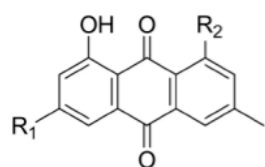

| compound | R <sub>1</sub>   | R <sub>2</sub> |
|----------|------------------|----------------|
| 33       | OH               | OH             |
| 34       | OCH <sub>3</sub> | H              |
| 35       | OCH <sub>3</sub> | OGlc           |
| 36       | OH               | OGlc           |

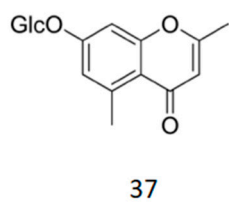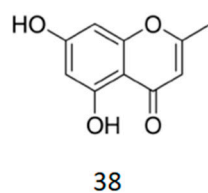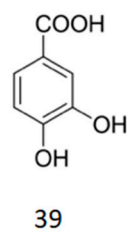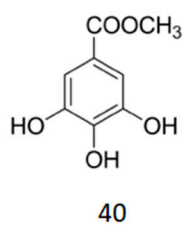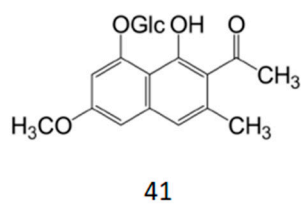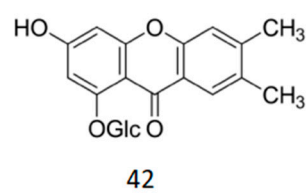



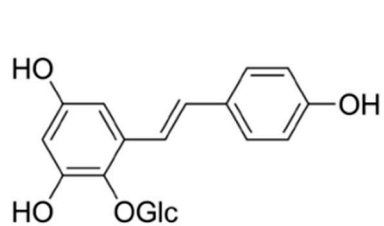

43

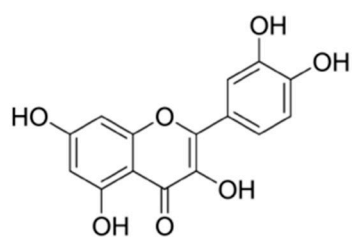

44

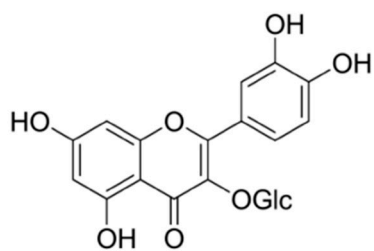

45

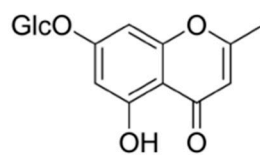

46

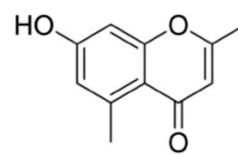

47

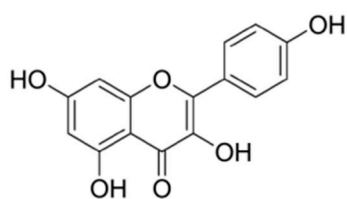

48

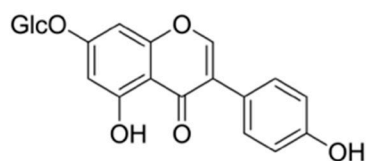

49

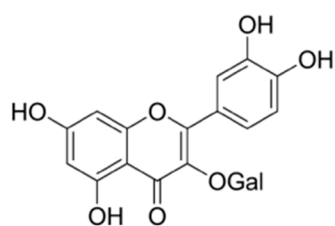

50

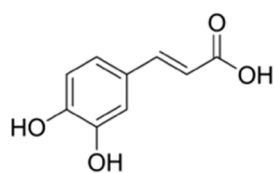

51

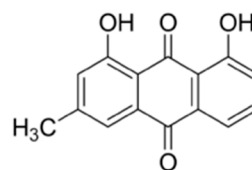

52

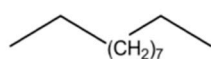

53

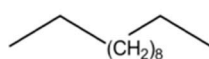

54

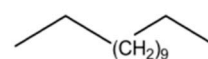

55



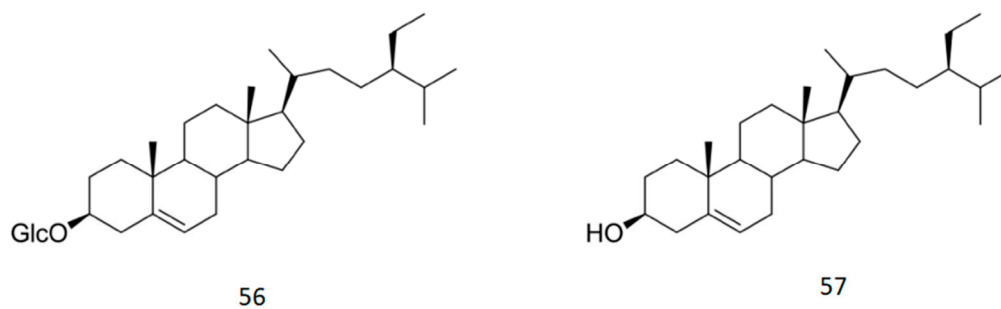

Figure S56.The structures of *Polygonum multiflorum* thumb

*Nelumbo nucifera* gaertn

Table S26 Chemical composition of *Nelumbo nucifera* gaertn

| NO. | compound                                                                  | NO | compound                              |
|-----|---------------------------------------------------------------------------|----|---------------------------------------|
| 1   | Luteolin 6-C-glucoside-8-C-glucoside                                      | 63 | O-Nornuciferine                       |
| 2   | Apigenin 6-C-glucoside-8-C-glucoside                                      | 64 | Roemerine                             |
| 3   | Luteolin 6-C-pentoside-8-C-glucoside                                      | 65 | Nuciferine                            |
| 4   | Chrysoeriol (Diosmetin) 6-C-pentoside (hexoside)-8-C-hexoside (pentoside) | 66 | Anonaine                              |
| 5   | Luteolin 6-C-pentoside-8-C-glucoside                                      | 67 | Coclaurine-5'-O-pentoside             |
| 6   | Apigenin 6-C-glucoside-8-C-polyxylosidase                                 | 68 | Oxidation-Nuciferine                  |
| 7   | Luteolin 6-C-glucoside-8-C-pentoside                                      | 69 | Lotusine 4' -O-glucoside              |
| 8   | Schaftoside                                                               | 70 | Norcocalurine 4' -O-glucoside         |
| 9   | Isoorientin                                                               | 71 | N-methylnorcoclaurine 7-O-glucoside   |
| 10  | Apigenin 6-C-polyxylosidase-8-C-glucoside                                 | 72 | N-methylnorcoclaurine 4' -O-glucoside |
| 11  | Luteolin 6-C- rhamnoside-8-C-pentoside                                    | 73 | Isolotusine 4'-O-glucoside            |
| 12  | Orientin                                                                  | 74 | Norcocalurine 6-O-glucoside           |



|    |                                                                              |     |                                                                           |
|----|------------------------------------------------------------------------------|-----|---------------------------------------------------------------------------|
| 13 | Isoschaftoside                                                               | 75  | N-methylcoclaurine 7-O-glucoside or<br>N-methylcoclaurine 4' -O-glucoside |
| 14 | Luteolin 6-C-pentoside-8-C-rhamnoside                                        | 76  | Norcoclaurine                                                             |
| 15 | Chrysoeriol (Diosmetin) 6-C-pentoside<br>(hexoside)-8-C-hexoside (pentoside) | 77  | N-methylnorcoclaurine                                                     |
| 16 | Quercetin 3-O-rhamnoside-glucoside                                           | 78  | Lotusine                                                                  |
| 17 | Chrysoeriol (Diosmetin) 6-C-pentoside<br>(hexoside)-8-C-hexoside (pentoside) | 79  | Isolotusine 4'-O-glucoside                                                |
| 18 | Quercetin 3-O-rhamnopyranosyl-<br>(1→6)-<br>glucopyranoside (rutin)          | 80  | Nornuciferidine                                                           |
| 19 | Isovitexin                                                                   | 81  | Norisoliensinine                                                          |
| 20 | Quercetin 3-O-galactoside                                                    | 82  | N-methylisococlaurine                                                     |
| 21 | Quercetin 3-O-glucuronide                                                    | 83  | Coclaurine                                                                |
| 22 | Quercetin 3-O-glucoside                                                      | 84  | 6-hydroxylnorisoliensinine                                                |
| 23 | Kaempferol 7-O-galactoside                                                   | 85  | N-methylcoclaurine                                                        |
| 24 | Diosmetin 6-C-glucoside                                                      | 86  | N-norisoliensinine                                                        |
| 25 | Luteolin 7-O-rutinoside                                                      | 87  | Liensinine                                                                |
| 26 | Kaempferol 3-O-<br>robinobiosideC27H30O15                                    | 88  | 4-methyl-N-methylcoclaurine                                               |
| 27 | Isorhamnetin 3-O-neohesperidoside                                            | 89  | Isoliensinine                                                             |
| 28 | Isorhamnetin 3-O-rutinoside                                                  | 90  | 3-hydroxylisoliensine                                                     |
| 29 | Isorhamnetin 3-O-galatoside                                                  | 91  | 6-demethyl-4' -methyl-N-<br>methylcoclaurine                              |
| 30 | Isorhamnetin 3-O-glucoside                                                   | 92  | Neferine                                                                  |
| 31 | Kaempferol 7-O-glucoside                                                     | 93  | Armepavine                                                                |
| 32 | Diosmetin (Chrysoeriol) 6,8-di-C-<br>glucoside                               | 94  | 3-hydroxylneferine                                                        |
| 33 | Diosmetin 8-C-glucoside                                                      | 95  | Nuciferine                                                                |
| 34 | Diosmetin 7-O-rutinoside                                                     | 96  | Quercetin 3-O-glucosyl -(1 → 2) -<br>glucoside                            |
| 35 | Chrysoeriol 7-O-glucoside                                                    | 97  | Luteolin 6, 8-di-C-glucosides                                             |
| 36 | Kaempferol                                                                   | 98  | Luteolin 6-C-pentoside-8-C-glucoside                                      |
| 37 | Quercetin                                                                    | 99  | Apigenin 6, 8-di-C-glucoside<br>(Vicenin-2)                               |
| 38 | Diosmetin                                                                    | 100 | Kaempferol 3-O-neohesperidosides 7-<br>O glucoside                        |
| 39 | Norcoclaurine-4'-O-glucoside                                                 | 101 | Luteolin 6-C-glucoside (Isoorientin)                                      |
| 40 | N-methylhigenamine                                                           | 102 | Luteolin 8-C-glucoside (Orientin)                                         |
| 41 | Norcoclaurine-6-O-glucoside                                                  | 103 | Apigenin 6-C-glucoside-8-C-<br>rhamnoside<br>(Violanthin)                 |
| 42 | Norcoclaurine                                                                | 104 | Quercetin 3-O-galactoside<br>(Hyperoside)                                 |



|    |                                            |     |                                                |
|----|--------------------------------------------|-----|------------------------------------------------|
| 43 | Argemexirine                               | 105 | Hesperitin 7-O-rutinoside<br>(Hesperidine)     |
| 44 | Lotusine                                   | 106 | Apigenin-6-C-glucoside (Isovitexin)            |
| 45 | Nornuciferidine                            | 107 | Apigenin 6-C-rhamnoside-8-C-<br>glucoside      |
| 46 | Norisoliensinine                           | 108 | 5,7,3',4',5'-pentahydroxyflavone<br>(Tricetin) |
| 47 | N-methylisococlaurine                      | 109 | Quercetin 3-O-glucoside<br>(Isoquercitrin)     |
| 48 | Isococlaurine                              | 110 | Apigenin-8-C-glucoside (Vitexin)               |
| 49 | N-methylcoclaurine                         | 111 | Luteolin                                       |
| 50 | 6-Hydroxynorisoliensinine                  | 112 | Quercetin 3-O-glucuronide<br>(Querciturone)    |
| 51 | Pronuciferine                              | 113 | Kaempferol-3-O-rutinoside<br>(Nicotiflorin)    |
| 52 | Thalifoline                                | 114 | Quercetin                                      |
| 53 | Armepavine                                 | 115 | Kaempferol                                     |
| 54 | Liensinine                                 | 116 | Kaempferol 7-O-neohesperidoside                |
| 55 | 6-demethy-4'-methyl-N-<br>methylcoclaurine | 117 | Isorhamnetin                                   |
| 56 | Coclaurine                                 | 118 | Isorhamnetin 3-O-neohesperidoside              |
| 57 | Isoliensinine                              | 119 | Apigenin-7-O-neohesperidoside<br>(Rhoifolin)   |
| 58 | N-Nornuciferine                            | 120 | Naringenin                                     |
| 59 | N-nor-O-methylarmepavine                   | 121 | Diosmetin                                      |
| 60 | Neferine                                   | 122 | Diosmetin 7-O-neohesperidoside<br>(Neodiosmin) |
| 61 | Nornuciferidine                            | 123 | Kaempferol 3-O-galactoside (Trifolin)          |
| 62 | Isococlaurine-5'-O-pentoside               | 124 | Kaempferol 3-O-glucoside<br>(Astragalin)       |

---

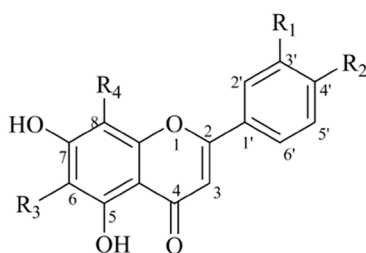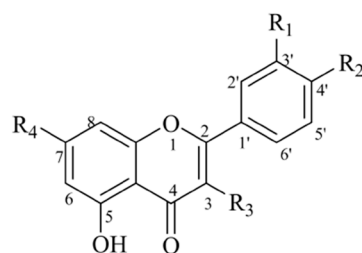



- 1  $R_1=R_2=OH$ ,  $R_3=R_4=Glc$
- 2  $R_1=H$ ,  $R_2=OH$ ,  $R_3=R_4=Glc$
- 3  $R_1=R_2=OH$ ,  $R_3=Glc$ ,  $R_4=Pen$
- 4  $R_1=O-CH_3$ ,  $R_2=OH$ ,  $R_3=Pen$ ,  $R_4=Hex$
- 5  $R_1=R_2=OH$ ,  $R_3=Glc$ ,  $R_4=Pen$
- 6  $R_1=H$ ,  $R_2=OH$ ,  $R_3=Glc$ ,  $R_4=Xyl$
- 7  $R_1=R_2=OH$ ,  $R_3=Pen$ ,  $R_4=Glc$
- 8  $R_1=H$ ,  $R_2=OH$ ,  $R_3=Glc$ ,  $R_4=Ara$
- 9  $R_1=R_2=OH$ ,  $R_3=Glc$ ,  $R_4=H$
- 10  $R_1=R_2=OH$ ,  $R_3=Xyl$ ,  $R_4=Glc$
- 11  $R_1=R_2=OH$ ,  $R_3=Rhm$ ,  $R_4=Pen$
- 12  $R_1=R_2=OH$ ,  $R_3=H$ ,  $R_4=Glc$
- 13  $R_1=H$ ,  $R_2=OH$ ,  $R_3=Ara$ ,  $R_4=Ara$
- 14  $R_1=R_2=OH$ ,  $R_3=Pen$ ,  $R_4=Rhm$
- 15  $R_1=O-CH_3$ ,  $R_2=OH$ ,  $R_3=Hex$ ,  $R_4=Pen$
- 17  $R_1=O-CH_3$ ,  $R_2=OH$ ,  $R_3=Hex$ ,  $R_4=Pen$
- 19  $R_1=H$ ,  $R_2=OH$ ,  $R_3=Glc$ ,  $R_4=H$
- 24  $R_1=OH$ ,  $R_2=OCH_3$ ,  $R_3=O-Glc$ ,  $R_4=H$
- 32  $R_1/R_2=O-CH_3$ ,  $R_1/R_2=OH$ ,  $R_3=R_4=Glc$
- 33  $R_1=OH$ ,  $R_2=OCH_3$ ,  $R_3=H$ ,  $R_4=Glc$

- 16  $R_1=R_2=OH$ ,  $R_3=O-Rhm-Glc$ ,  $R_4=OH$
- 18  $R_1=R_2=OH$ ,  $R_3=O-Rhm-(1 \rightarrow 6)-Glc$ ,  $R_4=OH$
- 20  $R_1=R_2=OH$ ,  $R_3=O-Gal$ ,  $R_4=OH$
- 21  $R_1=R_2=OH$ ,  $R_3=O-Gln$ ,  $R_4=OH$
- 22  $R_1=R_2=OH$ ,  $R_3=O-Glc$ ,  $R_4=OH$
- 23  $R_1=H$ ,  $R_2=OH$ ,  $R_3=OH$ ,  $R_4=O-Gal$
- 25  $R_1=R_2=OH$ ,  $R_3=H$ ,  $R_4=O-Rut$
- 26  $R_1=H$ ,  $R_2=OH$ ,  $R_3=O-Rob$ ,  $R_4=OH$
- 27  $R_1=OCH_3$ ,  $R_2=OH$ ,  $R_3=O-Neo$ ,  $R_4=OH$
- 28  $R_1=OCH_3$ ,  $R_2=OH$ ,  $R_3=O-Rut$ ,  $R_4=OH$
- 29  $R_1=OCH_3$ ,  $R_2=OH$ ,  $R_3=O-Gal$ ,  $R_4=OH$
- 30  $R_1=OCH_3$ ,  $R_2=OH$ ,  $R_3=O-Glc$ ,  $R_4=OH$
- 31  $R_1=H$ ,  $R_2=OH$ ,  $R_3=OH$ ,  $R_4=O-Glc$
- 34  $R_1=OH$ ,  $R_2=OCH_3$ ,  $R_3=H$ ,  $R_4=O-Rut$
- 35  $R_1=OCH_3$ ,  $R_2=OH$ ,  $R_3=H$ ,  $R_4=O-Glc$
- 36  $R_1=H$ ,  $R_2=OH$ ,  $R_3=OH$ ,  $R_4=OH$
- 37  $R_1=OH$ ,  $R_2=OH$ ,  $R_3=OH$ ,  $R_4=OH$
- 38  $R_1=OH$ ,  $R_2=O-CH_3$ ,  $R_3=H$ ,  $R_4=OH$

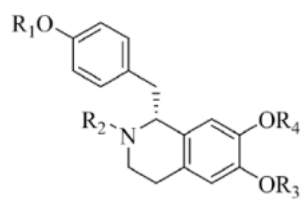

**S1**

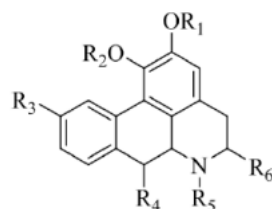

**S2**



| S1        | R <sub>1</sub>  | R <sub>2</sub>  | R <sub>3</sub>  | R <sub>4</sub>  | S2        | R <sub>1</sub>                                  | R <sub>2</sub>  | R <sub>3</sub>    | R <sub>4</sub> | R <sub>5</sub>  | R <sub>6</sub> |
|-----------|-----------------|-----------------|-----------------|-----------------|-----------|-------------------------------------------------|-----------------|-------------------|----------------|-----------------|----------------|
| <b>39</b> | Glc             | H               | H               | H               | <b>45</b> | CH <sub>3</sub>                                 | CH <sub>3</sub> | H                 | OH             | H               | H              |
| <b>40</b> | H               | CH <sub>3</sub> | H               | H               | <b>58</b> | CH <sub>3</sub>                                 | CH <sub>3</sub> | H                 | H              | H               | H              |
| <b>41</b> | H               | H               | Glc             | H               | <b>61</b> | H                                               | CH <sub>3</sub> | O-CH <sub>3</sub> | H              | H               | H              |
| <b>42</b> | H               | H               | H               | H               | <b>63</b> | H                                               | CH <sub>3</sub> | H                 | H              | CH <sub>3</sub> | H              |
| <b>43</b> | CH <sub>3</sub> | H               | H               | H               | <b>64</b> | R <sub>1</sub> +R <sub>2</sub> =CH <sub>2</sub> |                 | H                 | H              | CH <sub>3</sub> | H              |
| <b>47</b> | H               | CH <sub>3</sub> | CH <sub>3</sub> | H               | <b>65</b> | CH <sub>3</sub>                                 | CH <sub>3</sub> | H                 | H              | CH <sub>3</sub> | H              |
| <b>48</b> | H               | H               | H               | CH <sub>3</sub> | <b>66</b> | R <sub>1</sub> +R <sub>2</sub> =CH <sub>2</sub> |                 | H                 | H              | H               | H              |
| <b>49</b> | H               | CH <sub>3</sub> | H               | CH <sub>3</sub> | <b>68</b> | CH <sub>3</sub>                                 | CH <sub>3</sub> | H                 | H              | CH <sub>3</sub> | OH             |
| <b>53</b> | H               | CH <sub>3</sub> | CH <sub>3</sub> | CH <sub>3</sub> |           |                                                 |                 |                   |                |                 |                |
| <b>55</b> | CH <sub>3</sub> | CH <sub>3</sub> | H               | H               |           |                                                 |                 |                   |                |                 |                |
| <b>56</b> | H               | H               | CH <sub>3</sub> | H               |           |                                                 |                 |                   |                |                 |                |
| <b>59</b> | CH <sub>3</sub> | H               | CH <sub>3</sub> | CH <sub>3</sub> |           |                                                 |                 |                   |                |                 |                |

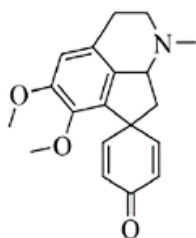

**51**

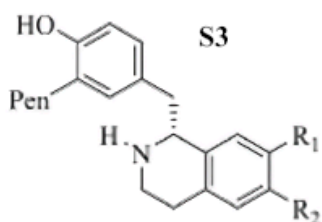

S3  
**62** OH OCH<sub>3</sub>

**67** OCH<sub>3</sub> OH

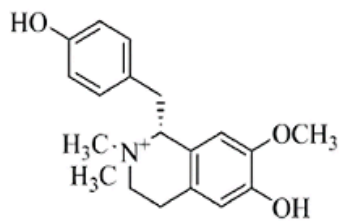

**44**

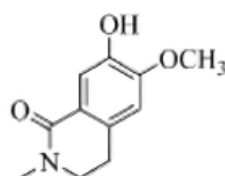

**52**

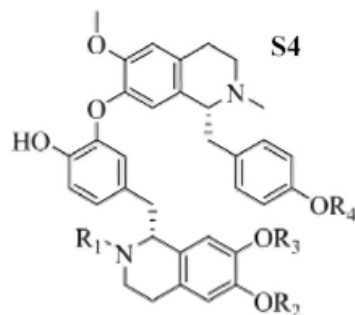

S4  
**46** CH<sub>3</sub> CH<sub>3</sub> H H  
**50** H H CH<sub>3</sub> CH<sub>3</sub>  
**54** CH<sub>3</sub> CH<sub>3</sub> CH<sub>3</sub> H  
**57** CH<sub>3</sub> CH<sub>3</sub> H CH<sub>3</sub>  
**60** CH<sub>3</sub> CH<sub>3</sub> CH<sub>3</sub> CH<sub>3</sub>



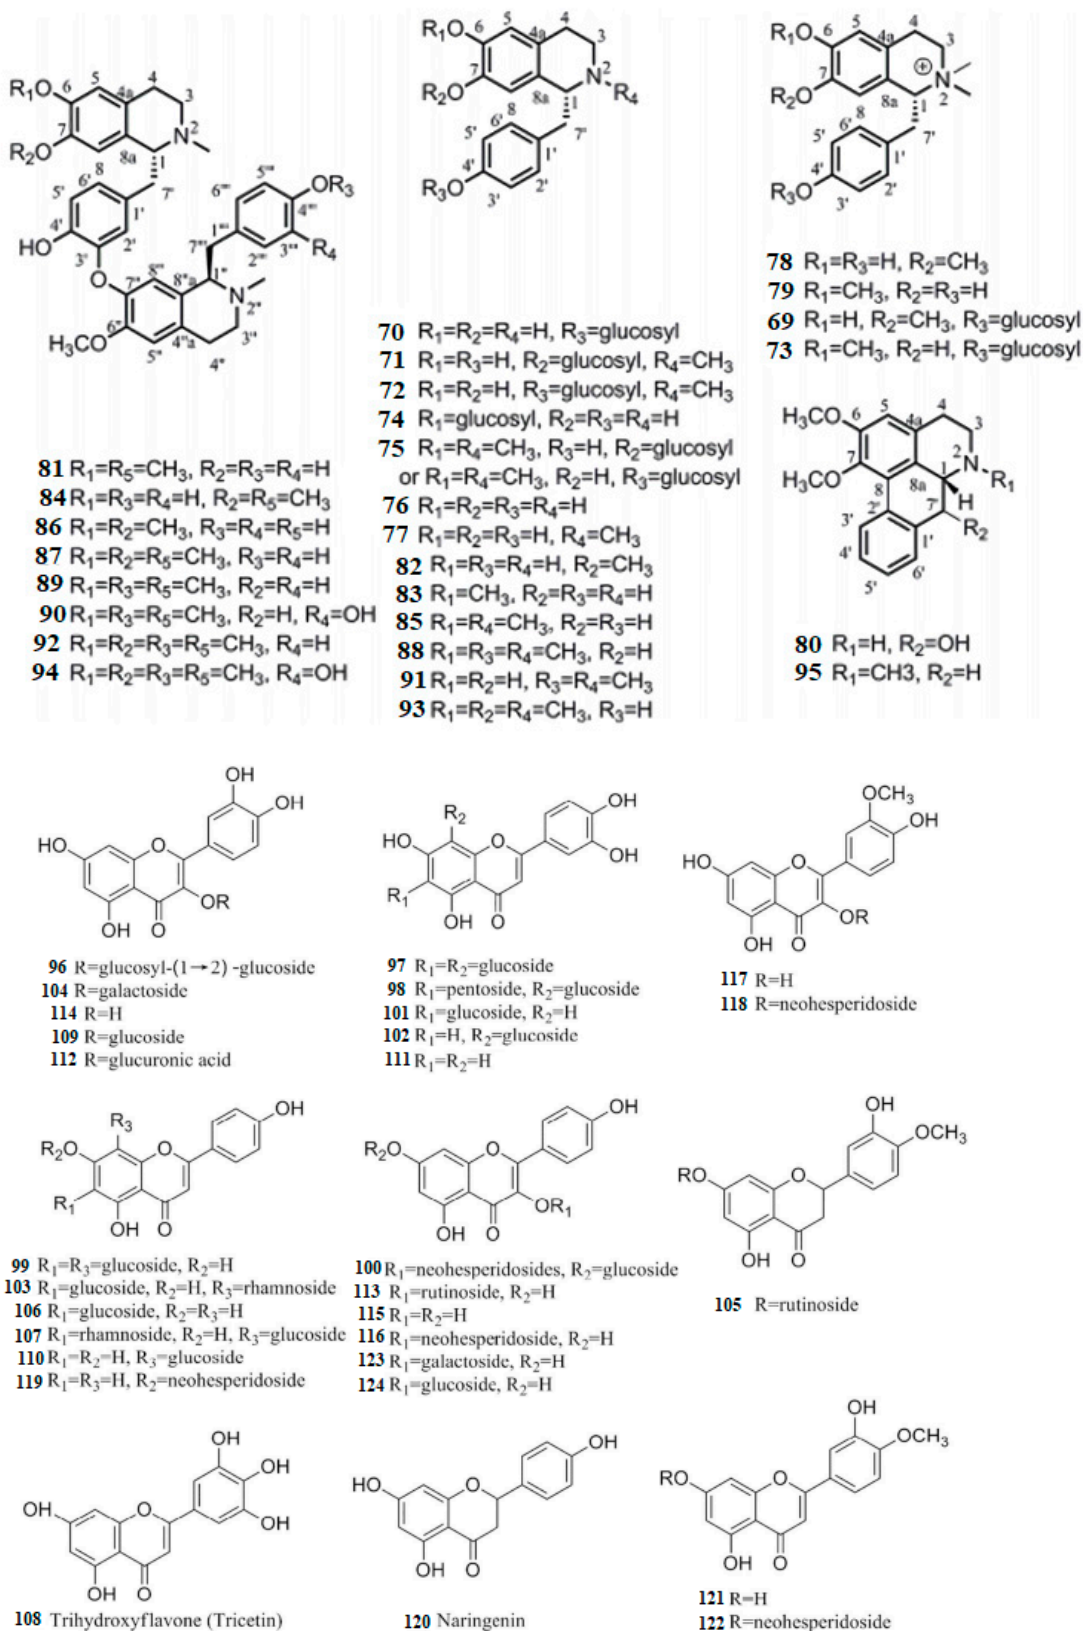

Figure S57. The chemical structures of *Nelumbo nucifera* Gaertn
